# Supplementary material for: Progressive mechanical and structural changes in anterior cerebral arteries with Alzheimer’s disease
Source: Alzheimers Res Ther. 2023 Oct 27;15:185. doi: 10.1186/s13195-023-01331-5 (PMC10605786; doi:10.1186/s13195-023-01331-5)
Supplement: Supplementary file 2 — Additional file 2. [file 13195_2023_1331_MOESM2_ESM.csv]

Protein Group	Protein ID	Protein Accession	Peptide	Unique	-10lgP	Mass	Length	ppm	m/z	z	RT	Area 3399_01	Area 3399_02	Area 3399_03	Area 3484_02	Area 3484_03	Area 3849_01	Area 3849_02	Area 3849_03	Area 4312_01	Area 4312_02	Area 4312_03	Area 4371_01	Area 4371_02	Area 4371_03	Area 4406_01	Area 4406_02	Area 4406_03	Area 4484_01	Area 4484_02	Area 4484_03	Area 5289_01	Area 5289_03	Area 6313_01	Area 6313_02	Area 6313_03	Area 6401_01	Area 6401_02	Area 6401_03	Area 6474_01	Area 6474_02	Fraction	Scan	Source File	#Feature	#Feature 3399_01	#Feature 3399_02	#Feature 3399_03	#Feature 3484_02
4	3	P21333|FLNA_HUMAN	K.LQVEPAVDTSGVQC(+57.02)YGPGIEGQGVFR.E	Y	121.75	2762.3333	26	-1.4	921.7838	3	51.90	2.5154E7	1.9677E7	2.2107E7	2.2203E7	2.4147E7	1.5292E6	1.2559E6	1.1375E6				8.5143E6	8.9667E6	6.367E6	2.3318E7	2.1725E7	1.6555E7	8.9352E6	9.8093E6	8.2405E6	1.3419E7	1.5293E7	7.1422E6	6.6895E6	7.2381E6	2.9743E7	3.0121E7	3.1602E7	2.3565E7	2.3336E7	12	F12:17079	4371_01.raw	46	2	2	2	2
4	3	P21333|FLNA_HUMAN	R.EEGPYEVEVTYDGVPVPGSPFPLEAVAPTKPSK.V	Y	97.31	3484.7288	33	0.8	1162.5845	3	61.77	3.5942E7	5.2561E6	3.2029E7	6.2003E7	6.6108E7	0	2.9244E5	0	4.2466E7	4.5896E7	4.0122E7	9.6777E6	2.0459E6	4.3788E6	2.3989E7	1.9965E7	2.0372E7	4.3633E7	3.7457E7	4.2717E7	4.7897E7	5.5538E7	1.1341E7	1.0206E7	9.3848E6	3.342E7	3.3243E7	3.1876E7	3.7062E7	3.6975E7	17	F17:20991	4406_03.raw	61	2	1	2	3
4	3	P21333|FLNA_HUMAN	R.FGGEHVPNSPFQVTALAGDQPSVQPPLR.S	Y	92.66	2944.4832	28	1.7	982.5033	3	53.09	2.1972E7	1.9683E7	1.6298E7	2.8995E7	3.0131E7				8.2288E6	8.2828E6	8.6246E6	9.501E6	8.1363E6	7.3799E6	2.0236E6	2.1477E6	1.4546E6	2.4079E7	2.0944E7	2.3508E7	4.229E7	5.2994E7	7.355E6	6.2446E6	6.9124E6	1.6531E7	1.6477E7	1.5275E7	1.6165E7	1.4719E7	2	F2:17796	3399_02.raw	27	1	1	1	1
4	3	P21333|FLNA_HUMAN	K.GQHVPGSPFQFTVGPLGEGGAHK.V	N	89.74	2303.1445	23	1.0	576.7940	4	46.43	4.4408E7	4.2851E7	4.2642E7	8.6418E7	8.2042E7	1.4448E7	1.1753E7	1.327E7	6.3671E7	5.9353E7	5.8712E7	2.0173E7	1.8663E7	1.646E7	7.7134E7	5.8804E7	6.5087E7	7.896E7	7.88E7	7.2056E7	3.3104E7	3.5645E7	3.1108E7	3.1653E7	3.0208E7	6.5555E7	6.3932E7	6.1222E7	3.8576E7	4.6387E7	2	F2:15515	3399_02.raw	60	2	2	2	2
4	3	P21333|FLNA_HUMAN	K.FNEEHIPDSPFVVPVASPSGDAR.R	Y	88.81	2466.1814	23	2.8	823.0701	3	50.46	6.1309E7	4.9525E7	5.6736E7	8.1737E7	9.0216E7				5.4146E7	5.6644E7	5.9064E7	1.7996E7	1.9511E7	1.6606E7	1.8494E7	1.6836E7	1.3487E7	1.0478E8	1.1056E8	1.0733E8	1.1038E8	1.1541E8	2.0905E7	1.8628E7	1.8826E7	9.5226E7	1.0167E8	9.9096E7	5.9461E7	5.9254E7	2	F2:17008	3399_02.raw	36	1	1	1	1
4	3	P21333|FLNA_HUMAN	R.ALGALVDSC(+57.02)APGLC(+57.02)PDWDSWDASKPVTNAR.E	Y	86.29	3228.4968	30	-0.3	808.1312	4	56.74	1.2385E6	0	8.3551E5		9.207E5																					0	7.2516E5	0			26	F26:18895	6401_01.raw	4	1	0	1	0
4	3	P21333|FLNA_HUMAN	K.VGSAADIPINISETDLSLLTATVVPPSGR.E	Y	86.08	2892.5444	29	1.2	965.1899	3	74.43	4.2638E7	3.8334E7	3.8431E7	5.8214E7	5.4419E7				1.9633E7	1.8721E7	1.6787E7	4.8322E6	4.453E6	4.4124E6	3.8167E6	2.7551E6	3.057E6	2.4832E7	2.1932E7	2.2599E7	5.4719E7	6.8814E7	1.5664E7	1.4684E7	1.3705E7	1.8499E7	3.9141E7	3.7781E7	2.3439E7	2.41E7	2	F2:24884	3399_02.raw	75	4	3	3	4
4	3	P21333|FLNA_HUMAN	K.GLVEPVDVVDNADGTQTVNYVPSR.E	Y	84.96	2543.2502	24	1.3	1272.6340	2	47.68	5.7167E7	5.644E7	5.4794E7	5.97E7	6.371E7				9.7602E6	1.2239E7	9.3583E6	2.6461E7	2.4899E7	2.6507E7		8.6922E5	1.4804E6	7.625E7	7.4718E7	7.4465E7	9.9782E7	1.3002E8	3.1505E7	2.9042E7	3.0935E7	9.2608E7	9.5825E7	8.4803E7	6.1923E7	6.6806E7	2	F2:15967	3399_02.raw	49	2	2	2	2
4	3	P21333|FLNA_HUMAN	K.YTPVQQGPVGVNVTYGGDPIPK.S	Y	84.51	2285.1692	22	7.1	1143.6000	2	44.06	9.5286E6	9.146E6	0	4.0949E7	1.967E7							0	0					2.4966E7		2.6068E7	1.7472E7	1.9925E7	4.5106E6	5.0437E6	5.0564E6	4.8729E7	4.6919E7	4.4435E7	1.1667E7	2.2132E7	26	F26:14688	6401_01.raw	21	1	1	0	2
4	3	P21333|FLNA_HUMAN	R.SAGQGEVLVYVEDPAGHQEEAK.V	Y	82.20	2312.0920	22	1.2	1157.0547	2	39.87	2.8318E7	2.7424E7	3.1222E7	4.9839E7	5.5047E7	1.376E7	1.5579E7	1.4081E7	6.1589E7	6.1435E7	6.2529E7	1.6413E7	1.2787E7	1.2457E7	1.0792E8	8.9595E7	8.7561E7	1.3152E8	1.2848E8	1.3114E8	4.9399E7	6.9513E7	1.097E7	1.0757E7	1.1437E7	5.6795E7	5.6064E7	5.6589E7	7.2703E7	7.3121E7	17	F17:13517	4406_03.raw	41	1	1	1	1
4	3	P21333|FLNA_HUMAN	K.THIQDNHDGTYTVAYVPDVTGR.Y	Y	80.23	2458.1514	22	6.8	820.3966	3	35.76		5.7469E6	6.553E6	1.7761E7	2.3663E7				1.1539E7	1.2788E7			3.0114E6					2.302E7	2.5825E7	2.8053E7	2.0438E7	2.7936E7				1.6875E7	3.2448E6	1.5382E7	6.4891E6	4.9207E6	28	F28:11700	6401_03.raw	23	0	1	1	1
4	3	P21333|FLNA_HUMAN	V.SYVPTEPGDYNINILFADTHIPGSPFK.A	Y	78.70	2991.4653	27	2.4	998.1648	3	68.71				5.2309E5	4.3761E5					0	4.0781E5				2.333E6	1.0214E6	1.1457E6														15	F15:23498	4406_01.raw	6	0	0	0	1
4	3	P21333|FLNA_HUMAN	Y.DGVPVPGSPFPLEAVAPTKPSK.V	Y	78.34	2189.1731	22	1.4	730.7327	3	52.28	1.7989E6	1.7562E6	1.8431E6	4.8875E6	5.9769E6	8.3905E6	9.8947E6	8.776E6	1.0313E7	1.0935E7	1.0196E7	6.554E5	7.5258E5	8.7626E5	1.6792E7	1.3103E7	1.2383E7	1.3055E7	1.1458E7	1.2766E7	1.4714E6	9.7395E5	7.9626E5	3.7144E5	5.3517E5	1.5126E6	1.5288E6	1.2959E6	7.1526E6	6.9124E6	7	F7:17331	3849_02.raw	30	1	1	1	1
4	3	P21333|FLNA_HUMAN	K.SADFVVEAIGDDVGTLGFSVEGPSQAK.I	Y	77.80	2694.3022	27	-2.6	899.1057	3	69.63	5.9778E5	5.3767E5	5.333E5	5.4306E6	1.3989E6				0	0	0				0	3.9228E4	1.6587E5	1.0096E6	8.1784E5	8.3058E5	5.3188E6	6.0468E6	2.38E5		4.4648E4	2.0189E6	1.4641E5	4.6543E5	1.2658E6	5.5562E5	5	F5:23350	3484_03_r.raw	29	2	2	1	2
4	3	P21333|FLNA_HUMAN	R.VGEPGHGGDPGLVSAYGAGLEGGVTGNPAEFVVNTSNAGAGALSVTIDGPSK.V	Y	76.73	4806.3369	52	-5.0	1202.5854	4	63.93				0	0																										4	F4:21462	3484_02.raw	0	0	0	0	0
4	3	P21333|FLNA_HUMAN	V.TYDGVPVPGSPFPLEAVAPTKPSK.V	Y	74.94	2453.2842	24	0.9	818.7694	3	54.16				6.7134E5	0	3.2843E6	4.0458E6	3.389E6	5.3207E6	4.6524E6	5.2913E6				1.4473E7	1.3806E7	1.3049E7	2.7271E6	2.2147E6	2.701E6									1.1803E6		17	F17:18504	4406_03.raw	14	0	0	0	1
4	3	P21333|FLNA_HUMAN	K.DGSC(+57.02)SVEYIPYEAGTYSLNVTYGGHQVPGSPFK.V	Y	74.76	3578.6299	33	5.4	1193.8904	3	57.06	5.3895E5	0	0	0																						0	0				1	F1:19184	3399_01.raw	1	1	0	0	0
4	3	P21333|FLNA_HUMAN	R.SPYTVTVGQAC(+57.02)NPSAC(+57.02)R.A	Y	74.21	1866.8352	17	2.1	934.4268	2	30.75		2.3314E6	2.6749E6	3.1988E6	0		2.3404E6	1.764E6				5.0503E6	4.0563E6	4.956E6	3.8517E7	3.2498E7	3.845E7	2.0801E6	2.5655E6	2.5834E6			1.6951E6	2.4712E6	2.109E6	1.2218E7	1.3423E7	1.39E7	1.9253E7	1.9113E7	12	F12:9726	4371_01.raw	31	0	1	1	1
4	3	P21333|FLNA_HUMAN	K.VHSPSGALEEC(+57.02)YVTEIDQDK.Y	Y	73.80	2276.0266	20	2.3	1139.0232	2	40.03	2.9769E7	2.4809E7	2.6748E7	4.9738E7	5.2993E7	1.852E7	1.9049E7	1.6258E7	1.7191E6	1.2259E6	1.4346E6	1.1359E7	1.0859E7	9.6281E6	9.1459E7	6.8887E7	6.6631E7	5.3068E7	5.0577E7	5.3728E7	3.1692E7	3.9963E7	8.1496E6	8.7198E6	8.4638E6	4.8944E7	5.0101E7	4.9127E7	5.0537E7	5.1163E7	18	F18:13169	4484_01.raw	35	1	1	1	1
4	3	P21333|FLNA_HUMAN	K.VEYTPYEEGLHSVDVTYDGSPVPSSPFQVPVTEGC(+57.02)DPSR.V	Y	72.92	4295.9482	39	0.1	1432.9901	3	56.85	7.0647E6	6.522E6	6.3038E6	1.2184E7	9.2716E6							0	0	1.6429E6	3.9549E6	1.6285E6	0	1.1583E6	0	9.4035E5	5.0706E6	4.215E6	0	0	0	1.5622E7	1.5948E7	1.4723E7	1.1984E7	8.5024E6	1	F1:19153	3399_01.raw	28	1	2	2	2
4	3	P21333|FLNA_HUMAN	K.ASGPGLNTTGVPASLPVEFTIDAK.D	Y	72.91	2341.2166	24	1.8	1171.6177	2	58.13	4.3432E7	4.2844E7	4.2035E7	3.2649E7	3.9076E7				2.8791E6	4.7128E6	4.8479E6	9.1929E6	8.2733E6	7.6374E6	8.9611E5	5.3925E5	5.0205E5	2.6294E7	2.0811E7	2.2278E7	8.1172E7	9.7231E7	2.5538E7	2.3135E7	2.3957E7	2.7343E7	3.0081E7	2.3447E7	1.3341E7	1.5121E7	2	F2:19514	3399_02.raw	51	2	2	2	2
4	3	P21333|FLNA_HUMAN	I.NISETDLSLLTATVVPPSGR.E	Y	71.94	2069.1003	20	2.1	1035.5596	2	60.99	1.3783E6	1.4013E6	1.2018E6	1.1493E7	1.3111E7	9.607E5	8.5478E5	1.0963E6	1.9385E7	2.054E7	1.6024E7				2.0642E7	1.7007E7	2.0247E7	1.04E7	8.5212E6	9.8495E6	8.229E5	1.659E6	0	6.3884E5	4.9178E5	1.8933E6	2.4234E6	2.2875E6	6.7523E6	6.8052E6	17	F17:20795	4406_03.raw	46	2	2	1	2
4	3	P21333|FLNA_HUMAN	K.DAGEGLLAVQITDPEGKPK.K	Y	71.43	1937.0105	19	1.1	969.5135	2	45.01	7.8223E7	6.9485E7	6.6867E7	7.138E7	7.8198E7	2.7182E6	2.2265E6	2.141E6	8.2011E7	7.5924E7	7.559E7	3.1667E7	3.1473E7	2.7879E7	4.148E7	3.5467E7	3.3796E7	1.1249E8	1.117E8	1.1311E8	8.7406E7	1.2192E8	5.1338E7	5.1998E7	4.8827E7	6.7242E7	6.1548E7	6.1294E7	5.9248E7	6.3886E7	18	F18:14848	4484_01.raw	63	2	2	2	2
4	3	P21333|FLNA_HUMAN	K.SPFSVAVSPSLDLSK.I	Y	70.48	1532.8086	15	0.9	767.4122	2	50.23	6.7169E7	5.4599E7	6.2222E7	9.5346E7	1.1456E8	2.2818E7	2.1096E7	1.8595E7	7.1593E7	6.715E7	7.6684E7	2.7284E7	2.6627E7	2.214E7	7.6044E7	5.9714E7	5.4267E7	1.3717E8	1.2253E8	1.245E8	1.1159E8	1.2656E8	3.8116E7	3.9397E7	3.6651E7	1.1267E8	1.1809E8	1.1664E8	5.7669E7	6.2688E7	24	F24:16357	6313_02.raw	58	2	2	2	2
4	3	P21333|FLNA_HUMAN	R.EGPYSISVLYGDEEVPR.S	Y	70.24	1908.9104	17	1.1	955.4636	2	50.15	3.7598E7	3.0925E7	3.6346E7	4.977E7	5.6551E7		0		2.4548E7	2.3047E7	2.4956E7	1.8065E7	1.7459E7	1.4312E7	1.9681E7	1.4496E7	1.3899E7	6.3242E7	5.4882E7	5.6318E7	5.329E7	6.2595E7	2.1826E7	2.265E7	2.1601E7	4.6731E7	4.721E7	4.6182E7	3.4594E7	3.5689E7	2	F2:16812	3399_02.raw	55	2	2	2	2
4	3	P21333|FLNA_HUMAN	R.DVDIIDHHDNTYTVK.Y	Y	70.20	1783.8376	15	0.5	892.9265	2	31.31	4.8603E7	4.35E7	5.126E7	1.0582E8	9.5349E7	5.0285E7	4.9148E7	4.2514E7	7.9691E7	9.0712E7	8.8129E7	2.5861E7	2.5058E7	2.2764E7	1.8877E8	1.6975E8	1.7546E8	1.7034E8	2.1242E8	1.9124E8	6.8008E7	1.0106E8	2.4343E7	2.3023E7	2.3422E7	9.8678E7	1.0615E8	9.2106E7	8.5076E7	9.3373E7	17	F17:10323	4406_03.raw	67	2	2	2	2
4	3	P21333|FLNA_HUMAN	R.EAGAGGLAIAVEGPSK.A	Y	70.06	1425.7463	16	1.4	713.8815	2	35.94	6.8291E7	6.249E7	6.5498E7	8.988E7	9.2956E7	1.45E7	1.6433E7	1.5071E7	9.0894E7	9.22E7	9.8874E7	2.9349E7	3.271E7	3.1078E7	1.1359E8	8.9273E7	1.0079E8	1.577E8	1.6718E8	1.7584E8	8.3476E7	1.1251E8	5.5709E7	5.4563E7	5.3347E7	9.3973E7	9.0885E7	8.682E7	6.1416E7	6.6297E7	11	F11:12072	4312_03.raw	30	1	1	1	1
4	3	P21333|FLNA_HUMAN	K.VTAQGPGLEPSGNIANK.T	Y	70.06	1651.8529	17	1.0	826.9346	2	26.72	6.9137E7	6.0031E7	7.0658E7	9.2169E7	9.4188E7	5.8465E7	5.5722E7	5.3053E7	9.209E7	9.6387E7	8.9185E7	4.7281E7	4.4981E7	4.2309E7	1.6685E8	1.5603E8	1.575E8	1.6553E8	1.6953E8	1.6212E8	7.3755E7	1.0575E8	6.2623E7	6.0214E7	6.3078E7	9.8945E7	9.9948E7	1.0031E8	8.4961E7	8.7914E7	24	F24:8168	6313_02.raw	61	2	2	2	2
4	3	P21333|FLNA_HUMAN	R.YWPQEAGEYAVHVLC(+57.02)NSEDIR.L	Y	69.94	2535.1489	21	0.8	846.0576	3	59.77	4.743E6	3.6893E6	3.4617E6	7.1169E6	7.8781E6							6.4106E5		8.1959E5							1.7627E6	2.1295E6	0			8.1136E6	7.5867E6	8.0474E6	4.4176E6	3.6316E6	2	F2:20053	3399_02.raw	14	1	1	1	1
4	3	P21333|FLNA_HUMAN	K.DAGEGGLSLAIEGPSK.A	Y	69.78	1499.7467	16	0.8	750.8812	2	41.56	5.8734E7	5.3752E7	5.6475E7	7.189E7	8.0056E7	1.847E7	1.7282E7	1.7488E7	7.7946E7	7.9771E7	8.2684E7	2.5E7	2.5775E7	2.4694E7	1.0399E8	9.4043E7	8.7959E7	1.4573E8	1.413E8	1.4853E8	7.9774E7	1.083E8	3.8749E7	3.8979E7	3.9818E7	7.3313E7	7.8838E7	7.3255E7	5.7329E7	5.7753E7	24	F24:13419	6313_02.raw	39	1	1	1	2
4	3	P21333|FLNA_HUMAN	R.VANPSGNLTETYVQDR.G	Y	68.69	1762.8485	16	0.7	882.4322	2	31.73	6.0569E7	9.8064E7	7.132E7	1.3186E8	1.2347E8	7.1637E6			5.0706E7	4.6266E7	5.1428E7	4.4037E7	4.4367E7	4.0265E7	8.9167E7	8.2078E7	7.6021E7	1.6107E8	1.6208E8	1.6699E8	1.037E8	1.2529E8	5.7474E7	5.1686E7	6.6683E7	1.3524E8	1.3358E8	1.2613E8	5.928E7	6.2258E7	26	F26:10150	6401_01.raw	48	1	2	1	2
4	3	P21333|FLNA_HUMAN	K.DGSC(+57.02)GVAYVVQEPGDYEVSVK.F	Y	68.63	2257.0208	21	0.7	1129.5184	2	44.63	1.4432E7	1.2425E7	1.3225E7	1.2259E7	1.2452E7													5.164E6	2.4134E6	4.9272E6	9.4387E6	1.1594E7	2.8989E6		2.6119E6	1.3779E7	1.3036E7	1.4274E7	4.7462E6	5.3616E6	18	F18:14754	4484_01.raw	31	2	2	2	2
4	3	P21333|FLNA_HUMAN	K.LQVEP(+15.99)AVDTSGVQC(+57.02)YGPGIEGQGVFR.E	Y	68.58	2778.3281	26	-2.0	927.1148	3	50.46				9.6458E5								0			0		0				5.494E5	7.1322E5				2.1069E6	1.7676E6	1.8893E6	1.7247E6	1.5119E6	28	F28:16785	6401_03.raw	8	0	0	0	1
4	3	P21333|FLNA_HUMAN	K.ATC(+57.02)APQHGAPGPGPADASK.V	Y	68.52	1788.8213	19	-0.5	597.2808	3	15.52	9.7623E6	8.3055E6	1.0666E7	8.6908E6	8.3183E6	6.1879E6	5.9583E6	6.2693E6				3.0509E6	2.5189E6	2.7143E6	6.7403E6	5.6492E6	5.0923E6	9.3607E6	8.7754E6	1.002E7	4.6929E6	6.1172E6		1.8752E6	2.2543E6	1.2932E7	1.4584E7	1.2107E7	2.3447E6		17	F17:3992	4406_03.raw	25	1	1	1	1
4	3	P21333|FLNA_HUMAN	R.LVSN(+.98)HSLHETSSVFVDSLTK.A	Y	68.50	2200.1011	20	2.6	734.3762	3	43.15	6.7715E6	1.4084E7	1.3368E7	2.1329E7	2.0134E7				1.139E7	1.0735E7	1.1755E7							2.4161E7	2.4332E7	2.5153E7	2.4091E7	3.2103E7				2.2658E7	2.3016E7	2.2008E7	5.9897E6	7.9395E6	26	F26:14373	6401_01.raw	35	1	2	2	2
4	3	P21333|FLNA_HUMAN	K.DNGNGTYSC(+57.02)SYVPR.K	Y	68.40	1588.6576	14	0.8	795.3367	2	26.76												2.6521E6	3.0639E6	2.5922E6				2.3254E6		2.1212E6					1.4E6	3.8493E6	4.5671E6	3.9925E6	3.365E6	2.5248E6	18	F18:8296	4484_01.raw	11	0	0	0	0
4	3	P21333|FLNA_HUMAN	V.DVVDNADGTQTVNYVPSR.E	Y	68.13	1948.9126	18	0.9	975.4645	2	32.31																		6.3562E6	1.4504E7	1.5079E7									2.8733E6	1.816E6	18	F18:10437	4484_01.raw	7	0	0	0	0
4	3	P21333|FLNA_HUMAN	V.SAYGAGLEGGVTGNPAEFVVNTSNAGAGALSVTIDGPSK.V	Y	67.76	3634.7749	39	4.2	1212.6040	3	62.89										0																					10	F10:21195	4312_02.raw	0	0	0	0	0
4	3	P21333|FLNA_HUMAN	R.VQVQDNEGC(+57.02)PVEALVK.D	Y	67.27	1783.8774	16	1.4	892.9472	2	38.90	1.8904E7	1.6055E7	1.8139E7	1.5917E7	1.4976E7	5.6798E6	4.9611E6	3.8799E6				1.5124E7	1.3667E7	1.3582E7	6.5336E7	5.7514E7	5.3222E7	1.4179E7	1.4424E7	1.455E7	6.4966E6	1.0547E7	8.4309E6	8.8067E6	9.5711E6	2.6938E7	2.4788E7	3.1852E7	2.2212E7	1.9634E7	24	F24:12539	6313_02.raw	33	1	1	1	1
4	3	P21333|FLNA_HUMAN	R.N(+.98)GHVGISFVPK.E	Y	67.26	1154.6084	11	-0.9	385.8764	3	36.37	2.0294E7	1.8129E7	2.0018E7	4.3951E7	4.6859E7	3.7322E5		1.0344E6	2.9545E7	2.96E7	3.1112E7	3.5392E6	4.6832E6	4.3526E6	3.5506E7	3.0551E7	3.185E7	5.5407E7	6.1381E7	5.9621E7	3.3438E7	4.2095E7	8.1213E6	7.9459E6	8.1901E6	3.7724E7	3.5494E7	3.4229E7	2.8132E7	2.9078E7	24	F24:11625	6313_02.raw	91	3	3	3	4
4	3	P21333|FLNA_HUMAN	R.VANPSGN(+.98)LTETYVQDR.G	Y	67.12	1763.8325	16	7.1	882.9298	2	33.36										0								2.2821E6	0	3.257E6											20	F20:10826	4484_03.raw	2	0	0	0	0
4	3	P21333|FLNA_HUMAN	R.GAGTGGLGLAVEGPSEAK.M	Y	67.05	1569.7998	18	1.5	785.9083	2	35.50	5.6982E7	5.0228E7	5.6522E7	8.3563E7	8.8191E7	2.1715E7	2.4035E7	2.1698E7	6.503E7	6.3292E7	7.1739E7	3.6273E7	4.2167E7	3.67E7	1.4446E8	1.293E8	1.2835E8	1.6806E8	1.7045E8	1.8814E8	7.0506E7	9.9925E7	4.2253E7	3.9926E7	3.9354E7	1.0657E8	1.0251E8	9.7072E7	9.5628E7	1.0326E8	20	F20:11670	4484_03.raw	30	1	1	1	1
4	3	P21333|FLNA_HUMAN	K.THEAEIVEGENHTYC(+57.02)IR.F	Y	66.52	2056.9272	17	1.2	686.6505	3	27.80				2.3797E6	2.4947E6	1.979E6	1.71E6	1.6349E6					1.5299E6		2.6819E7	1.9036E7	2.0818E7	3.2542E6	3.311E6	1.3591E6						7.5428E6	2.8834E6	7.2275E6	2.0525E6	3.1801E6	26	F26:8782	6401_01.raw	25	0	0	0	1
4	3	P21333|FLNA_HUMAN	K.AFGPGLQGGSAGSPAR.F	Y	66.29	1428.7109	16	1.9	715.3641	2	27.31	8.7455E7	7.6237E7	8.61E7	8.3673E7	7.7678E7	1.6163E7	1.5825E7	1.6721E7	6.3193E7	6.4531E7	6.601E7	5.4514E7	5.7852E7	5.2621E7	2.9414E7	2.7343E7	2.8141E7	9.0971E7	1.0519E8	1.0749E8	8.6655E7	1.1908E8	4.2196E7	4.1859E7	4.4915E7	1.1926E8	1.0925E8	1.0752E8	5.07E6	4.5609E6	24	F24:8401	6313_02.raw	36	2	2	2	1
4	3	P21333|FLNA_HUMAN	K.YGGPYHIGGSPFK.A	Y	66.19	1378.6670	13	1.3	690.3417	2	34.57	2.5711E7	2.334E7	2.6671E7	7.2421E7	7.1873E7	2.4981E7	2.4035E7	2.5646E7	2.786E7	3.5019E7	3.7032E7	8.8416E6	9.9151E6	8.7833E6	5.7247E7	5.1945E7	5.1296E7	8.5764E7	9.9333E7	9.4153E7	3.2431E7	4.7051E7	1.1132E7	9.6484E6	9.8363E6	5.835E7	5.5956E7	5.4731E7	1.7802E7	1.8047E7	26	F26:11267	6401_01.raw	47	1	1	1	2
4	3	P21333|FLNA_HUMAN	R.TFSVWYVPEVTGTHK.V	Y	65.41	1749.8726	15	6.5	875.9492	2	52.92	1.5215E7	1.2529E7	1.2615E7	2.4217E7	2.7662E7	4.5778E6	3.9938E6	4.6211E6	1.4058E7	1.3778E7	1.4963E7	2.6129E6	2.7585E6	3.0283E6	1.7417E7	1.9388E7	1.7597E7	3.5314E7	3.1806E7	3.2868E7	1.5849E7	1.907E7		3.8122E6	4.2256E6	2.0415E7	2.0969E7	1.97E7	1.3624E7	1.2442E7	17	F17:18052	4406_03.raw	46	2	1	1	2
4	3	P21333|FLNA_HUMAN	V.VEAIGDDVGTLGFSVEGPSQAK.I	Y	65.22	2175.0696	22	1.5	1088.5437	2	51.38									1.011E6	7.4348E5					3.1719E6	3.5712E6	3.2268E6														15	F15:17711	4406_01.raw	8	0	0	0	0
4	3	P21333|FLNA_HUMAN	R.AGQSAAGAAPGGGVDTR.D	Y	64.55	1441.6909	17	0.5	721.8531	2	15.81	2.4356E7	2.4198E7	2.5552E7	2.1888E7	2.1685E7	9.4512E6	1.0182E7	1.0624E7	1.66E7	1.7773E7	1.8257E7	2.1667E7	2.1787E7	2.0386E7	7.9176E6	8.6596E6	8.5108E6	8.7293E7	9.099E7	8.7351E7	3.6728E7	5.2881E7	1.3433E7	1.2658E7	1.2923E7	2.6158E7	2.6207E7	2.3534E7	1.4116E7	1.3191E7	24	F24:4207	6313_02.raw	35	1	1	1	1
4	3	P21333|FLNA_HUMAN	K.TGVAVNKPAEFTVDAK.H	Y	64.48	1645.8674	16	1.2	823.9420	2	31.72	7.1513E7	6.8407E7	7.2528E7	9.7501E7	9.702E7	2.5355E6	2.0319E6		4.4628E7	5.5975E7	4.9065E7	4.0208E7	4.4224E7	3.944E7	7.383E7	6.6993E7	6.3178E7	1.5813E8	1.6805E8	1.7686E8	8.9331E7	1.2649E8	5.6846E7	5.3981E7	5.3718E7	1.268E8	1.3029E8	1.2218E8	1.2754E8	1.3548E8	16	F16:10452	4406_02.raw	54	2	2	2	2
4	3	P21333|FLNA_HUMAN	R.VHGPGIQSGTTNKPNK.F	Y	64.41	1633.8536	16	0.2	545.6252	3	14.59	3.7481E7	3.1357E7	3.767E7	5.1534E7	4.8965E7	1.1032E7	1.0365E7	1.3189E7	3.9817E7	4.593E7	4.51E7	2.5824E7	2.1883E7	2.5775E7	1.4393E8	1.2993E8	1.1577E8	1.1173E8	1.2327E8	1.2218E8	3.3318E7	5.348E7	2.0584E7	1.9256E7	1.8261E7	7.0656E7	7.8307E7	7.1417E7	4.8572E7	4.6663E7	17	F17:3611	4406_03.raw	66	2	2	2	2
4	3	P21333|FLNA_HUMAN	E.EGPYEVEVTYDGVPVPGSPFPLEAVAPTKPSK.V	Y	64.38	3355.6863	32	1.0	1119.5704	3	60.46																										3.0505E5	0	0	0	4.3496E5	26	F26:20127	6401_01.raw	2	0	0	0	0
4	3	P21333|FLNA_HUMAN	R.GAGSYTIM(+15.99)VLFADQATPTSPIR.V	Y	64.37	2311.1519	22	2.6	771.3932	3	58.65		1.9636E5		2.643E6	2.2964E6				1.7148E6	1.5452E6	1.6176E6				1.7091E6		2.4728E6	1.1626E6	1.6225E6	1.1249E6	1.1676E6	1.5555E6				2.5174E6	2.8381E6	2.6759E6	1.2108E6	1.4709E6	4	F4:19641	3484_02.raw	18	0	1	0	1
4	3	P21333|FLNA_HUMAN	R.LVSNHSLHETSSVFVDSLTK.A	Y	63.74	2199.1172	20	2.1	734.0479	3	40.21	7.385E6	4.9867E6	6.0283E6	1.7988E7	1.8383E7				4.0979E6									1.7061E7	1.5857E7	1.7083E7	1.9584E7	2.3653E7				1.5264E7	8.7121E6	6.8779E6			5	F5:13412	3484_03_r.raw	22	1	1	1	2
4	3	P21333|FLNA_HUMAN	K.HTAM(+15.99)VSWGGVSIPNSPFR.V	Y	63.71	1957.9469	18	1.4	653.6572	3	51.07				2.4729E6	3.3159E6													1.8791E6	1.5997E6	2.2401E6		9.511E5				1.4587E6	4.0845E6	2.6228E6	4.9745E5	6.8165E5	18	F18:16900	4484_01.raw	12	0	0	0	1
4	3	P21333|FLNA_HUMAN	A.IGDDVGTLGFSVEGPSQAK.I	Y	63.66	1875.9214	19	2.7	938.9705	2	47.24						0			1.3824E7	1.3324E7	1.1348E7				3.3089E7	2.6708E7	2.6385E7		2.3976E6	2.0852E6										1.1354E6	16	F16:16132	4406_02.raw	15	0	0	0	0
4	3	P21333|FLNA_HUMAN	R.ANLPQSFQVDTSK.A	Y	63.63	1433.7151	13	0.1	717.8649	2	35.39	8.3749E7	7.6068E7	7.8459E7	6.7456E7	6.3735E7						1.0852E7	4.7533E7	4.7858E7	3.9865E7	6.4834E6	7.3389E6	6.0548E6	7.7657E7	9.3186E7	9.2216E7	9.1193E7	1.279E8	4.0987E7	4.1478E7	3.803E7	1.1952E8	1.2088E8	1.1784E8	1.054E7	1.1421E7	12	F12:11493	4371_01.raw	28	1	1	1	1
4	3	P21333|FLNA_HUMAN	K.GQHVPGSPFQFTVGPLGEGGAHK(+114.04).V	N	63.34	2417.1875	23	1.4	605.3050	4	46.27											9.3053E6												4.6969E6	2.0927E7	2.18E7						24	F24:14885	6313_02.raw	4	0	0	0	0
4	3	P21333|FLNA_HUMAN	S.C(+57.02)GVAYVVQEPGDYEVSVK.F	Y	63.28	1997.9404	18	1.4	999.9789	2	42.59				0																3.4877E5							6.2795E5	0	4.8817E5		20	F20:14123	4484_03.raw	3	0	0	0	0
4	3	P21333|FLNA_HUMAN	R.AEAGVPAEFSIWTR.E	Y	62.88	1532.7623	14	0.9	511.9285	3	54.14	5.9821E7	5.8154E7	5.2332E7	5.8991E7	6.9639E7	1.0802E7	8.6101E6	8.4063E6	6.063E7	5.791E7	6.2904E7	1.4501E7	1.5606E7	1.5421E7	2.2795E7	1.8559E7	1.9515E7	6.095E7	5.554E7	5.7533E7	6.1544E7	8.3185E7	2.3515E7	2.3891E7	2.1914E7	7.352E7	7.2419E7	6.6435E7	5.73E6	5.9743E6	2	F2:18119	3399_02.raw	52	2	2	2	2
4	3	P21333|FLNA_HUMAN	V.TYDGSPVPSSPFQVPVTEGC(+57.02)DPSR.V	Y	61.74	2578.1646	24	0.7	1290.0905	2	49.09															1.1614E7	1.1093E7	1.1579E7														15	F15:16960	4406_01.raw	6	0	0	0	0
4	3	P21333|FLNA_HUMAN	K.YNEQHVPGSPFTAR.V	Y	61.73	1601.7587	14	1.9	534.9279	3	28.27	5.2356E7	5.0187E7	4.9147E7	1.0801E8	9.9448E7	1.565E7	1.2945E7	1.1014E7	5.6952E7	4.9749E7	5.0405E7	2.6592E7	2.2571E7	2.2301E7	8.4708E7	7.1652E7	7.4463E7	1.2381E8	1.3338E8	1.3437E8	7.4194E7	8.7133E7	2.3853E7	2.0375E7	2.1568E7	1.0726E8	1.061E8	1.0071E8	3.0526E7	3.04E7	2	F2:9128	3399_02.raw	46	1	1	1	2
4	3	P21333|FLNA_HUMAN	K.IVGPSGAAVPC(+57.02)K.V	Y	61.54	1154.6117	12	-1.6	578.3122	2	24.40	4.9076E7	4.8219E7	5.2558E7	7.0176E7	7.3561E7	4.3795E7	4.0612E7	3.8217E7				3.7717E7	4.5005E7	3.829E7	1.663E8	1.5222E8	1.5132E8	3.7944E7	3.6478E7	3.5654E7	3.4285E7	5.1425E7	3.3663E7	2.9638E7	2.8119E7	1.0882E8	1.0601E8	1.0031E8	4.9549E7	4.9187E7	7	F7:7604	3849_02.raw	27	1	1	1	1
4	3	P21333|FLNA_HUMAN	K.VGSAADIPIN(+.98)ISETDLSLLTATVVPPSGR.E	Y	61.08	2893.5283	29	5.8	724.3936	4	74.63																			0								0				27	F27:24919	6401_02.raw	0	0	0	0	0
4	3	P21333|FLNA_HUMAN	K.VPVHDVTDASK.V	Y	60.91	1166.5931	11	0.0	389.8716	3	16.24	4.9496E7	4.3014E7	4.9496E7	1.0715E8	1.0464E8	7.3637E6	6.4153E6	0	6.0769E7	6.3201E7	6.6647E7	6.6738E6	8.4291E6	6.6909E6	1.5336E8	1.4864E8	1.4739E8	1.3122E8	1.4075E8	1.1965E8	5.7576E7	6.658E7	3.066E7	2.618E7	2.6117E7	9.4743E7	1.0155E8	9.9527E7	9.3739E7	8.8593E7	16	F16:4287	4406_02.raw	53	2	2	2	2
4	3	P21333|FLNA_HUMAN	E.ISIQDM(+15.99)TAQVTSPSGK.T	Y	60.88	1677.8243	16	0.1	839.9196	2	29.49																		1.4546E6	1.5286E6	1.2713E6											18	F18:9403	4484_01.raw	3	0	0	0	0
4	3	P21333|FLNA_HUMAN	Y.NEQHVPGSPFTAR.V	Y	60.81	1438.6953	13	0.9	480.5728	3	26.57				1.0134E7	9.835E6		1.9232E6		7.6469E6	8.5059E6	7.9615E6				7.2821E7	5.9759E7	6.1589E7	2.4048E7	2.4933E7	2.5714E7			3.6317E6	3.5025E6	3.1609E6		3.91E6	3.5397E6	3.5692E7	4.0219E7	17	F17:8497	4406_03.raw	27	0	0	0	1
4	3	P21333|FLNA_HUMAN	V.NTSNAGAGALSVTIDGPSK.V	Y	60.74	1758.8748	19	-0.8	880.4440	2	36.14											1.5476E6				3.849E6	4.0136E6															15	F15:12272	4406_01.raw	3	0	0	0	0
4	3	P21333|FLNA_HUMAN	V.TALAGDQPSVQPPLR.S	Y	60.52	1548.8259	15	0.9	775.4209	2	33.71	3.432E6		3.971E6	1.5777E7	1.6274E7	4.8165E6	4.6178E6	4.3092E6	4.0786E7	4.0038E7	4.226E7			1.4474E6	3.1723E7	2.0288E7	2.3049E7	2.0809E7	2.1778E7	2.2768E7	3.5419E6	4.6189E6	1.7317E6	1.4312E6		4.5702E6	3.8221E6	4.1571E6			18	F18:10804	4484_01.raw	36	1	0	1	2
4	3	P21333|FLNA_HUMAN	E.GPYSISVLYGDEEVPR.S	Y	60.51	1779.8679	16	2.7	890.9436	2	49.17																3.6721E5	0	4.2294E5								5.6649E6	5.7803E6	5.6095E6	5.1418E6	3.8648E6	29	F29:16218	6474_01.raw	7	0	0	0	0
4	3	P21333|FLNA_HUMAN	R.TGVELGKPTHFTVNAK.A	Y	60.50	1697.9100	16	1.4	849.9635	2	29.47	7.1392E7	5.8734E7	6.5415E7	1.1996E8	9.1185E7	1.6391E7	1.4454E7	1.5005E7	6.6573E7	6.9505E7	6.9903E7	2.9488E7	3.2685E7	2.8955E7	4.6791E7	3.9366E7	3.8149E7	1.471E8	1.6918E8	1.5908E8	8.4112E7	1.2212E8	3.9946E7	3.7299E7	3.4844E7	1.193E8	1.1979E8	1.1369E8	9.2131E7	9.5175E7	20	F20:9313	4484_03.raw	71	2	2	2	3
4	3	P21333|FLNA_HUMAN	V.RFGGEHVPNS(+203.08)P(+15.99)FQVTALAGDQPSVQPPLR.S	Y	60.37	3319.6584	29	1.1	1107.5613	3	55.53																		0		0											20	F20:18486	4484_03.raw	0	0	0	0	0
4	3	P21333|FLNA_HUMAN	V.SYLPVLPGDYSILVK.Y	Y	59.89	1662.9232	15	-0.6	832.4684	2	63.62	1.5548E6	1.2294E6	1.2649E6	7.1975E6	8.4165E6	1.034E6	2.7561E6	1.9298E6	1.8492E7	1.6705E7	1.634E7		0		1.1033E7	9.3618E6	8.1677E6	4.7466E6	3.9636E6	4.3676E6	6.6355E5	6.8268E5	3.5613E5	2.7459E5	3.2748E5	1.5346E6	0	1.4269E6	2.0498E6	1.9214E6	17	F17:21612	4406_03.raw	29	1	1	1	2
4	3	P21333|FLNA_HUMAN	Y.DGSPVPSSPFQVPVTEGC(+57.02)DPSR.V	Y	59.67	2314.0535	22	1.2	1158.0354	2	48.04				1.2505E6											3.0157E6	7.404E6	2.4079E6												3.299E6	3.6903E6	15	F15:16623	4406_01.raw	8	0	0	0	1
4	3	P21333|FLNA_HUMAN	R.APSVANVGSHC(+57.02)DLSLK.I	Y	59.54	1653.8145	16	-1.5	552.2780	3	32.31	1.1348E7	1.0333E7	1.1508E7	1.2649E7	1.2903E7							4.4258E6	3.6045E6	3.6402E6	1.2589E7	9.4495E6	1.0664E7	3.6842E6	4.9231E6	4.3418E6				2.5606E6	3.0579E6	8.6285E6	8.6264E6	9.2797E6	4.1439E6	4.2135E6	17	F17:10729	4406_03.raw	21	1	1	1	1
4	3	P21333|FLNA_HUMAN	A.VDTSGVQC(+57.02)YGPGIEGQGVFR.E	Y	59.31	2124.9897	20	3.3	1063.5056	2	44.81															2.9258E6	2.7806E6	3.5278E6														17	F17:15355	4406_03.raw	3	0	0	0	0
4	3	P21333|FLNA_HUMAN	T.ALAGDQPSVQPPLR.S	Y	59.28	1447.7783	14	2.4	724.8982	2	33.18	4.3743E6	3.7321E6	3.4886E6	1.9745E7	1.9975E7	1.3067E7	1.1723E7	1.1891E7	5.89E7	6.3851E7	6.8632E7				7.2775E7	6.3766E7	6.7007E7	2.8911E7	2.8886E7	2.9328E7	2.6919E6	3.789E6				3.1291E6	2.9605E6	2.6319E6	4.579E6	4.5338E6	15	F15:11192	4406_01.raw	31	1	1	1	2
4	3	P21333|FLNA_HUMAN	K.FNGTHIPGSPFK.I	Y	58.82	1300.6564	12	0.8	651.3360	2	35.68	2.697E7	2.5197E7	2.8835E7	6.5286E7	6.566E7	2.7106E7	2.2831E7	2.4356E7	4.0807E7	4.3894E7	4.6591E7	7.2552E6	7.3297E6	7.3879E6	5.6678E7	5.4902E7	5.1116E7	5.3305E7	6.482E7	6.1994E7	3.1763E7	4.2728E7	8.8277E6	9.12E6	8.649E6	5.0047E7	4.744E7	4.6827E7	1.6062E7	1.6459E7	16	F16:11977	4406_02.raw	53	2	2	2	2
4	3	P21333|FLNA_HUMAN	K.VNQPASFAVSLNGAK.G	Y	58.73	1501.7888	15	1.7	751.9030	2	38.39	3.9499E7	3.7608E7	4.0573E7	1.9371E7	2.2199E7							1.4557E7	1.1205E7	1.3069E7				4.1697E7	3.9315E7	3.911E7	4.8929E7	6.7248E7	3.5992E7	3.3504E7	3.2981E7	6.1822E7	6.4936E7	6.1449E7	7.6939E6	5.6377E6	24	F24:12289	6313_02.raw	33	1	2	2	1
4	3	P21333|FLNA_HUMAN	T.VGQAC(+57.02)NPSAC(+57.02)R.A	Y	58.73	1218.5233	11	-0.4	610.2687	2	14.48															1.2556E6	1.7359E6	1.7349E6														17	F17:3592	4406_03.raw	3	0	0	0	0
4	3	P21333|FLNA_HUMAN	P.GVVGPAEADIDFDIIR.N	Y	58.62	1685.8624	16	2.6	843.9407	2	58.19															8.7719E5	4.1517E5	3.2121E5												1.0958E6	8.7968E5	16	F16:19807	4406_02.raw	5	0	0	0	0
4	3	P21333|FLNA_HUMAN	K.C(+57.02)APGVVGPAEADIDFDIIR.N	Y	58.62	2013.9829	19	0.3	1007.9990	2	68.90	1.3921E6			1.9672E5	2.7906E5										1.5615E6	3.0011E5	3.7932E5	0		9.4843E4						6.8205E5			1.5533E5	4.1424E5	15	F15:23600	4406_01.raw	11	1	0	0	1
4	3	P21333|FLNA_HUMAN	A.NPSGNLTETYVQDR.G	Y	58.39	1592.7430	14	0.0	797.3788	2	29.53				2.198E6											1.0866E7	8.9071E6	9.5868E6	6.6484E6	7.2815E6	7.9718E6									1.5118E7	1.487E7	16	F16:9652	4406_02.raw	9	0	0	0	1
4	3	P21333|FLNA_HUMAN	K.ASGPGLN(+.98)TTGVPASLPVEFTIDAK.D	Y	58.14	2342.2004	24	8.2	781.7472	3	58.82	5.2673E5	0	1.1698E6	9.6864E5	1.0401E6																0	1.9437E6	0	4.7462E5		0		6.6832E5		0	1	F1:19855	3399_01.raw	7	1	0	1	1
4	3	P21333|FLNA_HUMAN	S.AADIPINISETDLSLLTATVVPPSGR.E	Y	57.88	2649.4224	26	-0.3	884.1478	3	72.98	1.8837E5	1.2049E5	2.1363E5	1.4103E6	6.6359E5				3.3706E5	8.9278E5	1.2685E6	0	6.8888E4		2.1159E6	1.002E6	8.1066E5	9.5261E5	1.0061E6	9.3435E5	2.3839E5	1.6637E5	3.0329E5	0	4.4058E5	1.3343E6	1.2997E6	8.4248E5	1.0628E6	1.1545E6	15	F15:24934	4406_01.raw	27	1	1	1	1
4	3	P21333|FLNA_HUMAN	K.YGGQPVPNFPSK.L	Y	57.87	1289.6404	12	0.1	645.8275	2	31.02	2.3708E7	2.3845E7	2.5558E7	3.8843E7	3.6836E7		0	6.2826E6	4.9745E7		5.185E7	1.6577E7	2.5458E7	0	8.5883E7	7.3876E7	7.5896E7	4.1396E7	4.0522E7	4.2215E7	0	0	0		0	2.9968E7	2.9046E7	2.4451E7	0	0	11	F11:10244	4312_03.raw	19	1	1	1	1
4	3	P21333|FLNA_HUMAN	R.ENGVYLIDVK.F	Y	57.39	1148.6077	10	-0.1	575.3110	2	42.34	2.7701E7	2.5068E7	2.5994E7	3.8265E7	4.0737E7	6.9338E6	7.3129E6	5.8506E6	5.8022E7	5.6409E7	5.7424E7	8.0185E6	8.236E6	7.2878E6	5.4834E7	5.4345E7	5.7697E7	3.5439E7	3.4829E7	3.7073E7	2.5865E7	3.2878E7	1.5444E7	1.5018E7	1.4688E7	2.7383E7	2.8278E7	2.731E7	1.9711E7	2.0373E7	17	F17:14436	4406_03.raw	30	1	1	1	1
4	3	P21333|FLNA_HUMAN	V.ANPSGNLTETYVQDR.G	Y	57.32	1663.7802	15	-0.5	832.8970	2	30.33				9.9764E5											1.5165E7	1.3729E7	1.3805E7	1.2091E7	1.2098E7	1.2914E7									1.5142E7	1.4265E7	16	F16:10006	4406_02.raw	9	0	0	0	1
4	3	P21333|FLNA_HUMAN	I.GDDVGTLGFSVEGPSQAK.I	Y	57.30	1762.8373	18	0.3	882.4261	2	43.70															3.7439E6	3.3358E6	4.1245E6														16	F16:14904	4406_02.raw	4	0	0	0	0
4	3	P21333|FLNA_HUMAN	A.HVVPC(+57.02)FDASK.V	Y	57.22	1158.5492	10	-1.3	580.2811	2	25.01					2.2829E6		0								3.1535E7	3.0181E7	3.0313E7	3.2112E6	3.8948E6	4.0239E6						1.1245E6			7.2348E6	7.134E6	17	F17:7909	4406_03.raw	10	0	0	0	0
4	3	P21333|FLNA_HUMAN	E.AIGDDVGTLGFSVEGPSQAK.I	Y	56.76	1946.9585	20	1.8	974.4883	2	48.23						1.6228E5		0	6.0275E5		5.2254E5				1.3391E6	8.7397E5			9.4609E5												9	F9:16320	4312_01.raw	6	0	0	0	0
4	3	P21333|FLNA_HUMAN	V.DC(+57.02)AEAGQGDVSIGIK.C	Y	56.72	1518.6984	15	9.4	760.3636	2	32.68															2.2786E6	0	2.611E7														15	F15:11000	4406_01.raw	2	0	0	0	0
4	3	P21333|FLNA_HUMAN	T.SLRPFDLVIPFTIK.K	Y	56.69	1644.9602	14	3.4	549.3292	3	69.27				0	2.1816E6				4.3995E5		0				2.4868E5	6.5665E6	5.9478E5	1.708E5										1.1053E5			17	F17:23519	4406_03.raw	9	0	0	0	0
4	3	P21333|FLNA_HUMAN	K.LDVQFSGLTK.G	Y	56.69	1106.5972	10	1.2	554.3065	2	41.50	6.9896E7	6.3605E7	6.5482E7	5.6989E7	6.8431E7	1.9882E7	1.6597E7	1.6406E7	7.221E7	6.9289E7	7.6861E7	2.7137E7	2.7952E7	2.6399E7	1.3654E7	1.1565E7	1.2862E7	6.3816E7	6.084E7	6.4828E7	8.6293E7	1.1344E8	3.5969E7	3.5259E7	3.4411E7	8.9982E7	9.878E7	9.2827E7	7.5278E6	7.6109E6	24	F24:13502	6313_02.raw	30	1	1	1	1
4	3	P21333|FLNA_HUMAN	K.VEPGLGADNSVVR.F	Y	56.60	1311.6782	13	2.4	656.8480	2	28.07	9.0653E7	8.7255E7	9.1653E7	1.3257E8	1.3313E8	7.6653E7	7.1909E7	6.691E7	1.4045E8	1.4078E8	1.4393E8	6.9121E7	7.2994E7	6.6811E7	2.5837E8	2.2369E8	2.2898E8	1.8606E8	2.243E8	2.2294E8	1.1505E8	1.524E8	7.6316E7	7.051E7	7.1999E7	1.7474E8	1.6043E8	1.667E8	6.6792E7	7.0457E7	24	F24:8734	6313_02.raw	30	1	1	1	1
4	3	P21333|FLNA_HUMAN	K.AHVVPC(+57.02)FDASK.V	Y	56.59	1229.5863	11	1.0	410.8698	3	25.68	1.4471E7	1.1985E7	1.3747E7	1.083E7	1.0553E7	3.6969E6	3.4227E6	3.6786E6				6.0738E6	6.8143E6	6.3383E6	8.8978E6	6.0293E6	7.1362E6	5.4291E6	5.3797E6	5.7035E6	5.5319E6	6.9142E6	2.8273E6	2.3752E6	2.0098E6	1.6825E7	1.753E7	1.6944E7		2.0617E6	18	F18:7874	4484_01.raw	26	1	1	1	1
4	3	P21333|FLNA_HUMAN	F.GGEHVPN(+.98)S(+203.08)PFQVTALAGDQPSVQPPLR.S	Y	56.38	3001.4780	27	9.1	1001.5091	3	54.19	1.6175E7	3.0055E6	2.3553E6	2.9864E6	1.004E6					0	0	0	5.1988E5							3.2996E6	2.1857E7	5.0259E6	4.1745E5	0	1.6492E6	2.7594E6	1.8828E6	0			20	F20:18086	4484_03.raw	15	2	1	1	1
4	3	P21333|FLNA_HUMAN	V.TYGGHQVPGSPFK.V	Y	56.36	1373.6727	13	4.1	687.8464	2	27.90							0	0	1.0361E7	1.1067E7	1.0084E7				2.9627E7	3.1184E7	3.0567E7	2.9978E6		2.946E6											17	F17:9008	4406_03.raw	11	0	0	0	0
4	3	P21333|FLNA_HUMAN	Y.GGPYHIGGSPFK.A	Y	56.20	1215.6036	12	0.6	608.8094	2	31.62															1.5135E7	1.4308E7	1.465E7	1.2848E6		2.3843E6									3.7808E6		16	F16:10395	4406_02.raw	6	0	0	0	0
4	3	P21333|FLNA_HUMAN	V.TAQGPGLEPSGNIANK.T	Y	56.19	1552.7845	16	0.1	777.3997	2	25.90						4.727E6	5.6394E6	4.9104E6							1.9178E7	1.7083E7	1.682E7	7.4139E6	7.7563E6	8.0373E6									5.6512E6	5.5219E6	17	F17:8145	4406_03.raw	11	0	0	0	0
4	3	P21333|FLNA_HUMAN	K.ETGEHLVHVK.K	Y	55.99	1147.5985	10	2.9	574.8082	2	16.72	1.9076E7	1.6547E7	1.7511E7	2.8957E7	3.0799E7	1.1985E7	1.1664E7	1.1991E7	2.4233E7	2.5833E7	2.6587E7	8.8928E6	9.3061E6	7.5537E6	6.3177E7	6.2207E7	5.8825E7	7.1554E7	8.1707E7	6.8953E7	2.8602E7	3.5772E7	6.3085E6	5.4957E6	6.2791E6	3.1592E7	3.6013E7	3.3156E7	1.2343E7	1.2005E7	17	F17:4452	4406_03.raw	51	2	2	1	2
4	3	P21333|FLNA_HUMAN	R.ALGALVDSC(+57.02)APGLC(+57.02)PDWDSWDASKPV.T	Y	55.91	2786.2681	26	-0.3	929.7631	3	63.45															1.8836E6	1.372E6															15	F15:21757	4406_01.raw	2	0	0	0	0
4	3	P21333|FLNA_HUMAN	A.FGPGLQGGSAGSPAR.F	Y	55.63	1357.6738	15	2.5	679.8459	2	25.98				2.6945E7	2.8879E7	5.9131E6	6.1628E6	5.0956E6	1.6309E7	1.6378E7	1.7517E7				9.7726E7	9.7539E7	1.0558E8	7.2691E7	7.5522E7	7.7714E7	2.3623E6	3.2205E6	1.7142E7	1.8641E7	1.6752E7	1.129E7	1.0376E7	1.032E7	5.916E7	6.5558E7	24	F24:7915	6313_02.raw	25	0	0	0	1
4	3	P21333|FLNA_HUMAN	K.DAGEGLLAVQITDPEGK.P	Y	55.61	1711.8628	17	2.2	856.9406	2	49.66									2.6044E6	2.8189E6	2.9212E6					2.1552E6	2.0163E6	4.1079E6	3.5706E6	3.2333E6						2.0498E6	2.1526E6		2.2785E6	1.9722E6	11	F11:16841	4312_03.raw	12	0	0	0	0
4	3	P21333|FLNA_HUMAN	K.VYGPGVAK.T	Y	55.31	789.4385	8	0.0	395.7265	2	16.75	4.1647E7	4.464E7	4.655E7	4.6566E7	5.189E7	2.6279E7	2.7474E7	2.4175E7	2.1771E7	2.1842E7	2.3186E7	3.4723E7	3.517E7	2.7987E7	3.1736E7	2.6881E7	2.887E7	6.7123E7	6.8712E7	6.7737E7	4.7328E7	6.4947E7	2.3031E7	2.298E7	2.1252E7	6.4143E7	6.9665E7	6.6453E7	9.1238E6	8.3759E6	24	F24:4424	6313_02.raw	30	1	1	1	1
4	3	P21333|FLNA_HUMAN	K.THIQDNHDGTYTV.A	Y	55.15	1499.6641	13	0.7	750.8398	2	21.50					2.893E6	3.7961E6	4.5483E6	4.4839E6	1.4711E7	1.5265E7	1.5674E7				6.118E7	5.563E7	5.0702E7	6.9691E6	6.5662E6	6.591E6											17	F17:6400	4406_03.raw	16	0	0	0	0
4	3	P21333|FLNA_HUMAN	R.NDNDTFTVK.Y	N	55.15	1052.4774	9	-1.2	527.2454	2	22.83	2.4578E7	2.3816E7	2.6063E7	5.7824E7	5.991E7	2.133E7	1.8777E7	1.8403E7	7.7112E7	7.6301E7	7.7239E7	3.0119E7	3.1819E7	2.6624E7	1.8914E8	1.7731E8	1.7788E8	1.039E8	1.0965E8	1.1054E8	3.0692E7	4.5589E7	2.3871E7	2.1818E7	2.1119E7	4.6159E7	4.9553E7	4.3332E7	1.2544E8	8.3026E7	16	F16:6976	4406_02.raw	31	1	1	1	1
4	3	P21333|FLNA_HUMAN	V.AYVVQEPGDYEVSVK.F	Y	55.06	1681.8198	15	2.4	841.9192	2	38.19				3.8215E6	3.2348E6	1.0489E7	1.0365E7	1.1189E7	1.3399E7	1.2768E7	1.1941E7				5.3192E7	4.6364E7	4.8049E7	8.3739E6	9.5802E6	9.4745E6									3.4018E6	2.7437E6	16	F16:12962	4406_02.raw	19	0	0	0	1
4	3	P21333|FLNA_HUMAN	V.TSLRPFDLVIPFTIK.K	Y	54.85	1746.0079	15	1.7	583.0109	3	67.75									1.1322E7	1.0633E7	0				2.4612E6																11	F11:22895	4312_03.raw	3	0	0	0	0
4	3	P21333|FLNA_HUMAN	K.THIQDN(+.98)HDGTYTVAYVPDVTGR.Y	Y	54.69	2459.1353	22	6.1	820.7241	3	35.72	8.097E5			3.8824E6														4.5325E6								2.9845E6		2.3014E6			4	F4:11852	3484_02.raw	5	1	0	0	1
4	3	P21333|FLNA_HUMAN	K.SSFTVDC(+57.02)SK.A	Y	54.48	1029.4437	9	1.4	515.7299	2	20.67	1.1851E7	1.1187E7	1.2575E7	1.9677E7	1.882E7	1.1461E7	1.1311E7	1.1137E7							2.7531E7	3.019E7	2.883E7	3.0868E7	2.932E7	2.9287E7	7.0568E6	9.7062E6	8.2459E6	6.9528E6	7.8659E6	3.0307E7	3.1353E7	3.0989E7	6.8462E6	6.7161E6	16	F16:6097	4406_02.raw	24	1	1	1	1
4	3	P21333|FLNA_HUMAN	I.VGPSGAAVPC(+57.02)K.V	Y	54.45	1041.5277	11	0.2	521.7712	2	19.02				3.6416E6	5.0934E6			4.4282E6							6.9371E7	5.9258E7	6.5018E7	5.0189E6	4.9778E6	5.3745E6			4.1223E6	4.1325E6	3.7826E6				4.1579E7	3.8616E7	16	F16:5400	4406_02.raw	14	0	0	0	1
4	3	P21333|FLNA_HUMAN	R.AWGPGLEGGVVGK.S	Y	54.11	1225.6455	13	-0.2	613.8299	2	38.59	9.2347E7	6.7988E7	8.5784E7	8.8445E7	9.8415E7	2.7033E7	2.6296E7	2.3209E7	4.6029E7	4.7877E7	4.6198E7	5.4581E7	5.531E7	4.7136E7	4.2111E7	3.5079E7	3.4448E7	1.1206E8	1.1602E8	1.2342E8	7.5308E7	1.1512E8	4.9484E7	4.7223E7	4.4662E7	1.3748E8	1.3476E8	1.2895E8	1.285E7	1.5316E7	1	F1:12933	3399_01.raw	30	1	1	1	1
4	3	P21333|FLNA_HUMAN	Y.TPVQQGPVGVNVTYGGDPIPK.S	Y	54.08	2122.1057	21	2.3	1062.0626	2	41.81					2.422E5														6.5427E5										5.5821E6	2.8916E6	29	F29:13704	6474_01.raw	5	0	0	0	0
4	3	P21333|FLNA_HUMAN	K.VTVLFAGQHIAK.S	Y	54.05	1282.7397	12	-1.4	428.5866	3	36.23	1.7092E7	1.4888E7	1.5296E7	2.8941E7	2.8804E7	9.1389E6	9.1053E6	8.1412E6	1.712E7	1.739E7	1.9477E7	2.7474E6	3.9386E6	2.2156E6	3.3447E7	2.9604E7	2.9085E7	3.7396E7	3.4429E7	3.9592E7	1.981E7	2.6272E7	5.5591E6	4.2528E6	5.185E6	2.3075E7	2.3293E7	2.4453E7	1.3911E7	1.4775E7	16	F16:12166	4406_02.raw	54	2	2	2	2
4	3	P21333|FLNA_HUMAN	R.NGHVGISFVPK.E	Y	54.01	1153.6244	11	-1.3	385.5482	3	31.20	9.2381E6	8.9851E6	9.8391E6	1.6225E7	1.7008E7			1.0099E6	7.5511E6	6.7639E6	7.959E6	3.9739E6	3.3727E6	3.4969E6	9.8417E6	6.5301E6	7.904E6	2.1776E7	2.3939E7	2.2956E7	1.2373E7	1.666E7				1.8248E7	1.8761E7	1.961E7	1.0095E7	1.1137E7	26	F26:10090	6401_01.raw	25	1	1	1	1
4	3	P21333|FLNA_HUMAN	T.SGVQC(+57.02)YGPGIEGQGVFR.E	Y	53.95	1809.8468	17	2.1	905.9326	2	42.13															0		3.3401E6														15	F15:14549	4406_01.raw	1	0	0	0	0
4	3	P21333|FLNA_HUMAN	V.EPGLGADNSVVR.F	Y	53.92	1212.6099	12	2.5	607.3137	2	26.84				1.4759E7	1.5572E7										9.864E7	8.9007E7	8.8536E7	5.4591E7	5.4753E7	5.4473E7						0	0	0	8.5649E7	9.5172E7	17	F17:8558	4406_03.raw	10	0	0	0	1
4	3	P21333|FLNA_HUMAN	K.AGNNM(+15.99)LLVGVHGPR.T	Y	53.89	1449.7511	14	-0.7	484.2573	3	29.66		1.3075E6	1.4204E6	1.0335E7	9.2505E6		1.0322E6	1.1453E6	3.5931E6	3.6728E6	3.739E6				7.4056E6	5.5218E6	6.1845E6	1.1751E7	1.4563E7	1.3387E7	4.0212E6	6.2872E6				6.1314E6	5.2438E6	5.7761E6			18	F18:9397	4484_01.raw	20	0	1	1	1
4	3	P21333|FLNA_HUMAN	K.LPQLPITN(+.98)FSR.D	Y	53.83	1285.7030	11	-0.3	643.8586	2	52.16	1.8949E6	1.6177E6	1.9299E6	1.5461E6	2.1964E6					9.7159E5	1.0445E6			1.4549E6				1.3614E6	9.5509E5		2.3179E6	2.7132E6				2.3486E6	2.8743E6	2.6644E6	1.0568E6		5	F5:17516	3484_03_r.raw	16	1	1	1	1
4	3	P21333|FLNA_HUMAN	K.N(+.98)GQHVASSPIPVVI.S	Y	53.75	1417.7565	14	2.4	709.8872	2	51.73				9.2402E5	1.0125E6														2.0411E6	2.357E6											20	F20:17245	4484_03.raw	4	0	0	0	1
4	3	P21333|FLNA_HUMAN	C.YGPGIEGQGVFR.E	Y	53.75	1278.6356	12	2.1	640.3264	2	38.53				1.0495E6				0	1.7351E6	1.8378E6	1.8783E6				1.2616E7	1.0726E7	1.0938E7	1.2849E6	1.625E6	1.472E6						1.3565E6	1.1608E6	9.9371E5		2.0494E6	16	F16:13066	4406_02.raw	14	0	0	0	1
4	3	P21333|FLNA_HUMAN	V.TFAGVPIPR.S	Y	53.69	956.5443	9	2.1	479.2804	2	40.66						4.5011E6	4.1238E6	4.5276E6	5.0798E6	5.1937E6	5.6273E6				1.4926E7	1.4257E7	1.3116E7	1.4616E6	0												7	F7:13489	3849_02.raw	10	0	0	0	0
4	3	P21333|FLNA_HUMAN	A.LAGDQPSVQPPLR.S	Y	53.62	1376.7412	13	3.4	689.3802	2	30.98									8.5758E6	8.4202E6	8.1575E6				2.2693E7	2.0673E7	2.0529E7	7.3523E6	7.2617E6	6.7823E6											15	F15:10315	4406_01.raw	9	0	0	0	0
4	3	P21333|FLNA_HUMAN	K.SPFEVYVDK.S	Y	53.61	1082.5283	9	1.8	542.2724	2	36.88	4.2371E7	3.7637E7	4.2102E7	7.5785E7	6.9945E7		1.3152E7	1.3934E7	6.9674E7	6.908E7	7.0857E7	2.4062E7	2.4063E7		1.5536E8	1.2751E8	1.2749E8	1.3122E8	1.4202E8	1.3558E8	5.7207E7	7.2691E7	2.8032E7	2.8321E7	2.817E7	7.9396E7	7.0098E7	7.3786E7	9.7394E7	1.0027E8	28	F28:12086	6401_03.raw	28	1	1	1	1
4	3	P21333|FLNA_HUMAN	V.HGPGIQSGTTNKPNK.F	Y	53.61	1534.7852	15	0.7	512.6027	3	13.41						5.8092E6	2.7102E6	2.5817E6							4.766E6	7.5682E5															7	F7:3234	3849_02.raw	6	0	0	0	0
4	3	P21333|FLNA_HUMAN	S.AADIPIN(+.98)ISETDLSLLTATVVPPSGR.E	Y	53.51	2650.4065	26	4.3	884.4799	3	71.71																								0							24	F24:23541	6313_02.raw	0	0	0	0	0
4	3	P21333|FLNA_HUMAN	D.AGEGLLAVQITDPEGKPK.K	Y	53.49	1821.9835	18	2.0	608.3363	3	42.24																										5.6692E6	6.4795E6	5.5895E6	1.9273E6	1.9187E6	26	F26:13998	6401_01.raw	5	0	0	0	0
4	3	P21333|FLNA_HUMAN	L.VYVEDPAGHQEEAK.V	Y	53.30	1570.7263	14	1.0	524.5833	3	19.87						1.0279E7	6.1843E6	1.0296E7							2.1886E7	1.9463E7	2.3166E7	4.6682E6	5.1165E6	4.4207E6										1.925E6	7	F7:5781	3849_02.raw	12	0	0	0	0
4	3	P21333|FLNA_HUMAN	V.TVGQAC(+57.02)NPSAC(+57.02)R.A	Y	53.18	1319.5710	12	-2.0	660.7915	2	15.24															7.9511E6	8.0546E6															16	F16:3874	4406_02.raw	2	0	0	0	0
4	3	P21333|FLNA_HUMAN	R.EATTEFSVDAR.A	Y	53.14	1224.5623	11	2.1	613.2897	2	27.78	4.5323E7	4.1779E7	4.6384E7	5.8202E7	5.2786E7				2.9913E7	3.2098E7	3.2128E7	2.6487E7	2.8231E7	2.6394E7	2.2855E7	2.0354E7	1.9774E7	9.3229E7	1.0635E8	1.0726E8	6.2433E7	8.3883E7	2.8309E7	2.6284E7	2.6045E7	2.8376E7	2.7836E7	2.5876E7	1.4214E7	1.4997E7	18	F18:8721	4484_01.raw	27	1	1	1	1
4	3	P21333|FLNA_HUMAN	D.AGEGGLSLAIEGPSK.A	Y	52.99	1384.7197	15	2.4	693.3688	2	40.43															9.7454E6	1.0041E7	7.2832E6	6.0878E6	4.698E6	6.7474E6						2.8419E7	2.7933E7	2.5372E7	1.6994E7	1.7339E7	16	F16:13783	4406_02.raw	11	0	0	0	0
4	3	P21333|FLNA_HUMAN	V.PVHDVTDASK.V	Y	52.93	1067.5247	10	0.5	534.7699	2	16.36	1.833E6		1.6521E6	6.6993E6								2.1557E6	1.9962E6	2.0406E6		1.248E7	1.3123E7	8.6374E6	8.5497E6			2.7454E6		1.2142E6		5.8029E6	5.6089E6	5.0274E6	4.167E6	4.2212E6	17	F17:4363	4406_03.raw	17	1	0	1	1
4	3	P21333|FLNA_HUMAN	E.NGVYLIDVK.F	Y	52.90	1019.5651	9	0.2	510.7899	2	40.79															6.3278E6	5.8192E6	6.0255E6												3.506E6	3.3177E6	29	F29:13282	6474_01.raw	5	0	0	0	0
4	3	P21333|FLNA_HUMAN	R.APS(+79.97)VANVGSHC(+57.02)DLSLK.I	Y	52.86	1733.7808	16	-0.6	578.9338	3	33.58				4.8093E6	4.7832E6										1.0525E7	3.7299E6	1.0552E7										4.0886E6	4.0237E6			4	F4:11032	3484_02.raw	8	0	0	0	1
4	3	P21333|FLNA_HUMAN	F.NGTHIPGSPFK.I	Y	52.59	1153.5880	11	1.4	577.8021	2	28.78				3.2887E6	3.3548E6										4.5777E7	3.3985E7	4.1616E7	3.2796E6	3.5202E6	5.5381E6									1.4364E7	1.4233E7	16	F16:9374	4406_02.raw	16	0	0	0	1
4	3	P21333|FLNA_HUMAN	R.LRN(+.98)GHVGISFVPK.E	Y	52.59	1423.7936	13	0.3	356.9558	4	33.17			8.7951E5															8.1465E5			1.7691E6	2.1295E6									3	F3:10993	3399_03.raw	4	0	0	1	0
4	3	P21333|FLNA_HUMAN	Y.VVQEPGDYEVSVK.F	Y	52.44	1447.7195	13	1.8	724.8683	2	30.44															2.6898E7	2.416E7	2.1793E7	5.5579E6	6.3362E6	5.7844E6											16	F16:9986	4406_02.raw	6	0	0	0	0
4	3	P21333|FLNA_HUMAN	M.VSWGGVSIPNSPFR.V	Y	52.20	1501.7677	14	4.3	751.8943	2	55.42		0		1.4099E6	0					1.4031E6																0					5	F5:18609	3484_03_r.raw	2	0	0	0	1
4	3	P21333|FLNA_HUMAN	A.WGPGLEGGVVGK.S	Y	52.12	1154.6084	12	1.0	578.3121	2	39.12				2.9052E7	2.4889E7	1.4711E7	1.4213E7	1.5901E7	1.2218E7	1.19E7	1.2949E7		2.3587E6	2.1755E6	7.9508E7	7.5227E7	8.0696E7	7.2828E7	7.6608E7	7.4935E7			1.3578E7	1.3279E7	1.2702E7	1.5525E7	1.5475E7	1.4925E7	7.8057E7	8.0384E7	16	F16:13234	4406_02.raw	24	0	0	0	1
4	3	P21333|FLNA_HUMAN	R.FGGEHVPNSPFQVT.A	Y	52.01	1514.7153	14	1.6	758.3661	2	42.45				4.7203E6	4.3019E6		3.2283E6		1.1078E7	9.0659E6	9.4506E6				2.254E7	1.7495E7	1.6764E7	7.3201E6	5.9538E6	6.9534E6											11	F11:14364	4312_03.raw	12	0	0	0	1
4	3	P21333|FLNA_HUMAN	R.IANLQTDLSDGLR.L	Y	51.98	1414.7416	13	1.9	708.3794	2	43.10	2.9467E7	2.5636E7	2.7153E7	2.8429E7	3.2196E7	8.1017E6	7.1783E6	6.7628E6	5.6004E7	5.493E7	5.4411E7	1.5477E7	1.4465E7	1.366E7	2.3964E7	2.0946E7	2.0341E7	2.8656E7	2.7339E7	2.7641E7	4.0508E7	5.0963E7	1.0333E7	1.0316E7	1.0516E7	3.0979E7	3.0151E7	2.9486E7	4.5511E6	4.5491E6	24	F24:14008	6313_02.raw	30	1	1	1	1
4	3	P21333|FLNA_HUMAN	N.LPQSFQVDTSK.A	Y	51.96	1248.6350	11	1.9	625.3260	2	30.68																		0	0										0	0	29	F29:9670	6474_01.raw	0	0	0	0	0
4	3	P21333|FLNA_HUMAN	I.SETDLSLLTATVVPPSGR.E	Y	51.90	1841.9734	18	4.7	921.9983	2	55.70															4.6461E5																15	F15:19234	4406_01.raw	1	0	0	0	0
4	3	P21333|FLNA_HUMAN	E.AGAGGLAIAVEGPSK.A	Y	51.90	1296.7037	15	2.2	649.3606	2	34.92				2.5456E6	2.3337E6	1.0456E6	9.1693E5								1.4193E7	1.2605E7	1.1887E7	6.5043E6	7.3782E6	7.3888E6			2.3199E6	1.8757E6	2.0515E6	1.7882E7	1.7885E7	1.792E7	2.2126E7	2.2732E7	26	F26:11413	6401_01.raw	18	0	0	0	1
4	3	P21333|FLNA_HUMAN	S.YLPVLPGDYSILVK.Y	Y	51.73	1575.8911	14	2.1	788.9545	2	62.13									6.1357E5	1.2938E6	7.9756E5				4.7009E6	5.8592E5	3.5191E6												8.4436E5		15	F15:21338	4406_01.raw	7	0	0	0	0
4	3	P21333|FLNA_HUMAN	R.DAPQDFHPDR.V	Y	51.63	1196.5210	10	0.1	399.8477	3	19.02	3.6919E7	3.348E7	3.5849E7	5.124E7	5.2045E7	1.7011E7	1.8279E7	2.2838E7	3.7713E7	3.6572E7	4.0018E7				5.8014E7	4.9996E7	5.248E7	1.2689E8	1.2124E8	1.2183E8	5.4802E7	7.1608E7				4.0693E7	4.2464E7	3.9264E7	2.6164E7	2.4214E7	16	F16:5517	4406_02.raw	25	1	1	1	1
4	3	P21333|FLNA_HUMAN	K.LPQLPITNFSR.D	Y	51.29	1284.7190	11	2.0	643.3680	2	50.61	9.274E7	7.6062E7	8.2614E7	8.3192E7	9.9694E7				2.9865E7	3.0349E7	3.0867E7	3.0053E7	3.3549E7	2.915E7				9.1483E7	9.2861E7	9.3806E7	1.4171E8	1.4897E8	5.6555E7	5.3345E7	5.3655E7	1.1285E8	1.1678E8	1.1829E8	4.7252E7	4.7809E7	24	F24:16462	6313_02.raw	25	1	1	2	1
4	3	P21333|FLNA_HUMAN	V.WYVPEVTGTHK.V	Y	51.17	1315.6560	11	2.3	439.5603	3	37.61						5.7587E6	1.0945E6	7.4226E6							2.6924E7	2.2079E7	2.5481E7														15	F15:12940	4406_01.raw	10	0	0	0	0
4	3	P21333|FLNA_HUMAN	C.APGVVGPAEADIDFDIIR.N	Y	51.12	1853.9523	18	3.0	927.9862	2	58.90															4.2886E5	1.5278E5	0			0									1.5515E5		15	F15:20275	4406_01.raw	3	0	0	0	0
4	3	P21333|FLNA_HUMAN	K.GTVEPQLEAR.G	Y	50.88	1098.5669	10	2.2	550.2919	2	22.68	6.98E7	6.2736E7	7.4924E7	9.3493E7	9.894E7	8.3126E7	7.6649E7	6.5261E7	1.0587E8	1.0071E8	1.1293E8	6.279E7	6.5444E7	5.0693E7	2.5294E8	2.2914E8	2.1361E8	2.1531E8	2.1116E8	2.0936E8	9.9617E7	1.4066E8	6.0101E7	5.813E7	5.3597E7	1.2542E8	1.354E8	1.375E8	8.424E7	8.5342E7	24	F24:6786	6313_02.raw	30	1	1	1	1
4	3	P21333|FLNA_HUMAN	K.VNQPASFAVSLN(+.98)GAK.G	Y	50.65	1502.7728	15	1.4	752.3948	2	40.22	1.7833E6	1.3982E6	2.1104E6															2.9869E6	2.3311E6		3.5866E6	3.8895E6	1.2512E6	1.4143E6	9.0392E5	3.0968E6	3.159E6	2.8042E6			22	F22:13439	5289_03_r.raw	13	1	1	1	0
4	3	P21333|FLNA_HUMAN	R.TPC(+57.02)EEILVK.H	Y	50.56	1087.5583	9	3.0	544.7881	2	29.51	2.2977E7	1.7532E7	2.1917E7	3.7194E7	3.9593E7	1.248E7	1.7464E7	1.6315E7				1.1691E7				1.244E8		5.3768E7			1.0777E7	1.5778E7				4.0613E7	3.6141E7	4.0127E7			3	F3:9604	3399_03.raw	16	1	1	1	1
4	3	P21333|FLNA_HUMAN	Y.TVTVGQAC(+57.02)NPSAC(+57.02)R.A	Y	50.56	1519.6871	14	2.3	760.8526	2	20.73															4.2823E6	4.7164E6	5.0506E6														16	F16:6046	4406_02.raw	3	0	0	0	0
4	3	P21333|FLNA_HUMAN	E.AGVPAEFSIWTR.E	N	50.44	1332.6826	12	1.2	667.3494	2	54.03			3.1943E5	2.8514E6	3.0009E6	2.6153E5	0	2.7859E5	2.2344E6	2.3342E6	2.1763E6				6.1633E6	5.7522E6	4.9639E6	4.7579E6	3.8016E6	4.4621E6			1.9103E6	1.8905E6	1.4793E6	1.7244E6	1.985E6	1.8447E6	3.1183E6	3.2295E6	15	F15:18578	4406_01.raw	22	0	0	1	1
4	3	P21333|FLNA_HUMAN	G.AGTGGLGLAVEGPSEAK.M	Y	50.35	1512.7783	17	2.2	757.3981	2	35.11																		0											1.0947E7	7.5576E6	29	F29:11230	6474_01.raw	2	0	0	0	0
4	3	P21333|FLNA_HUMAN	K.IPEISIQDMTAQVTSP(+15.99)SGK.T	Y	50.31	2017.0038	19	4.7	1009.5139	2	41.56				2.8049E6	2.5594E6										2.9552E6	3.1219E6	3.119E6	2.7066E6	2.6409E6	3.2476E6						1.4641E6	1.291E6				16	F16:14144	4406_02.raw	10	0	0	0	1
4	3	P21333|FLNA_HUMAN	K.GLVEPVDVVDNADGTQTV.N	Y	50.15	1826.8898	18	1.3	914.4533	2	50.80					1.3255E7				1.9805E7	1.8008E7	2.0327E7	1.2632E6			3.5641E7	2.6017E7	2.7415E7	2.9514E7	2.6835E7	2.5742E7									2.3255E7	2.5032E7	17	F17:17398	4406_03.raw	13	0	0	0	0
4	3	P21333|FLNA_HUMAN	G.GPYHIGGSPFK.A	Y	50.13	1158.5822	11	0.4	387.2015	3	31.78															6.1658E6	5.2261E6	5.2746E6												3.462E6		17	F17:10505	4406_03.raw	4	0	0	0	0
4	3	P21333|FLNA_HUMAN	T.VDC(+57.02)AEAGQGDVSIGIK.C	Y	49.94	1617.7668	16	3.2	809.8932	2	33.15																2.0858E6	1.8256E6														16	F16:11017	4406_02.raw	2	0	0	0	0
4	3	P21333|FLNA_HUMAN	A.GVPAEFSIWTR.E	N	49.73	1261.6455	11	1.8	631.8312	2	51.43				1.253E6	1.6742E6				1.2135E6	1.3118E6	1.0201E6				7.7393E6	5.9646E6	5.9722E6	1.9331E6	1.5902E6	1.7658E6			0		0	5.974E5	0	5.3652E5	4.3127E6	4.1845E6	17	F17:17573	4406_03.raw	20	0	0	0	1
4	3	P21333|FLNA_HUMAN	R.TFSVWYVPEVTGTHK(+114.04).V	Y	49.65	1863.9155	15	-0.3	622.3123	3	51.15		5.5749E6	3.5918E6							1.2931E7	0												7.3531E6	6.7538E6	6.3929E6						25	F25:16418	6313_03.raw	6	0	1	1	0
4	3	P21333|FLNA_HUMAN	K.VHSP(+15.99)SGALEEC(+57.02)YVTEIDQDK.Y	Y	49.63	2292.0215	20	2.4	765.0163	3	37.54				1.7294E6															2.1371E6			1.4845E6									19	F19:12429	4484_02.raw	3	0	0	0	1
4	3	P21333|FLNA_HUMAN	K.IPEISIQDM(+15.99)TAQVTSPSGK.T	Y	49.59	2017.0038	19	0.5	1009.5097	2	40.42									9.5639E5																						9	F9:13613	4312_01.raw	1	0	0	0	0
4	3	P21333|FLNA_HUMAN	P.FSVAVSPSLDLSK.I	Y	49.57	1348.7238	13	2.8	675.3710	2	46.66				4.5644E5	3.9127E5													1.4645E6	1.5758E6	1.3821E6						9.3941E5	6.9156E5	8.3395E5	3.4094E6	4.1658E6	26	F26:15533	6401_01.raw	10	0	0	0	1
4	3	P21333|FLNA_HUMAN	R.AEFTVETR.S	Y	49.57	951.4661	8	1.6	476.7411	2	25.20	5.3982E7	5.2809E7	5.9143E7	8.5219E7	8.9446E7	6.5787E7	5.8682E7	5.9193E7	9.9018E7	1.0129E8	1.0593E8	4.4108E7	4.1439E7	3.4193E7	1.292E8	1.2318E8	1.148E8	1.3407E8	1.4851E8	1.4396E8	7.6558E7	9.9905E7	3.4262E7	3.2388E7	2.9703E7	9.6257E7	9.3354E7	8.7671E7	3.3087E7	3.5224E7	15	F15:7981	4406_01.raw	31	1	1	1	1
4	3	P21333|FLNA_HUMAN	T.FSVWYVPEVTGTHK.V	Y	49.53	1648.8250	14	0.3	550.6158	3	51.46															9.8109E5	6.9984E5													1.0711E6	1.1669E6	15	F15:17761	4406_01.raw	4	0	0	0	0
4	3	P21333|FLNA_HUMAN	K.VAQPTITDNK.D	Y	49.41	1085.5717	10	0.2	543.7932	2	17.83	6.7962E7	7.2025E7	0	1.0699E8	1.1151E8	6.0081E7		5.4272E7	9.2495E7	9.8297E7	8.8719E7	4.8665E7	4.2572E7	4.9273E7		7.8234E7	8.5103E7	1.4604E8	1.5574E8	1.468E8	8.7648E7	1.192E8	5.7927E7	5.46E7	5.3066E7	1.0746E8	1.2168E8	1.1762E8		1.5391E7	24	F24:4871	6313_02.raw	26	1	1	0	1
4	3	P21333|FLNA_HUMAN	M.DC(+57.02)QEC(+57.02)PEGYR.V	Y	49.28	1312.4812	10	1.2	657.2487	2	17.95															7.8048E6	7.0388E6	6.7185E6														15	F15:4990	4406_01.raw	3	0	0	0	0
4	3	P21333|FLNA_HUMAN	G.VPAEFSIWTR.E	N	49.23	1204.6240	10	1.3	603.3201	2	51.01				2.1431E6	1.7823E6				1.079E6	1.2526E6	1.338E6				1.9655E7	1.38E7	1.2738E7	3.5569E6	3.0702E6	3.2724E6			1.3999E6	1.7464E6	1.4885E6				6.6013E6	6.494E6	15	F15:17638	4406_01.raw	16	0	0	0	1
4	3	P21333|FLNA_HUMAN	R.YAPSEAGLHEM(+15.99)DIR.Y	Y	49.21	1603.7300	14	1.7	802.8737	2	25.24				9.7012E6														1.6783E7	1.8417E7	1.7376E7	5.6985E6	7.2938E6									20	F20:7793	4484_03.raw	9	0	0	0	1
4	3	P21333|FLNA_HUMAN	V.HVTFAGVPIPR.S	Y	49.20	1192.6716	11	0.1	398.5645	3	40.53							1.9202E6	1.5702E6	2.4737E6						2.4148E7	1.1053E7	1.0077E7														16	F16:13849	4406_02.raw	7	0	0	0	0
4	3	P21333|FLNA_HUMAN	K.AEISC(+57.02)TDNQDGTC(+57.02)SV.S	Y	48.93	1655.6404	15	0.4	828.8278	2	25.49															1.0558E7	9.1176E6	9.1145E6														16	F16:7954	4406_02.raw	3	0	0	0	0
4	3	P21333|FLNA_HUMAN	A.EAGVPAEFSIWTR.E	N	48.91	1461.7252	13	0.7	731.8704	2	55.09				1.0464E7	1.1519E7				9.4326E6	9.3077E6	1.0354E7				2.6248E7	2.2121E7	2.1335E7	1.7077E7	1.6269E7	1.8103E7			4.6168E6	3.5118E6	4.0463E6	3.6983E6	3.3507E6	3.2554E6	9.6252E6	9.8402E6	15	F15:18907	4406_01.raw	19	0	0	0	1
4	3	P21333|FLNA_HUMAN	K.YTPVQQGPVGVN(+.98)VTYGGDPIPK.S	Y	48.90	2286.1531	22	10.0	763.0659	3	43.88	1.0762E7																				2.1288E7		7.9168E6		5.4607E6						1	F1:14823	3399_01.raw	4	1	0	0	0
4	3	P21333|FLNA_HUMAN	P.SGNLTETYVQDR.G	Y	48.81	1381.6473	12	2.3	691.8325	2	26.09															4.7742E6	4.7875E6	5.1178E6												9.4913E6	1.0372E7	29	F29:7948	6474_01.raw	5	0	0	0	0
4	3	P21333|FLNA_HUMAN	K.HNQRPTFR.Q	Y	48.79	1054.5420	8	-0.4	352.5211	3	13.73						1.615E7	1.5851E7	1.3519E7	8.5211E6	5.1918E6	2.0129E6	8.1924E6	8.6463E6	7.9301E6	5.8119E7	4.5554E7	3.5675E7	2.2646E7	1.7133E7	1.804E7									4.2618E6	3.8011E6	11	F11:3460	4312_03.raw	17	0	0	0	0
4	3	P21333|FLNA_HUMAN	R.LIALLEVLSQK.K	N	48.70	1225.7645	11	0.6	613.8899	2	67.39	2.134E6	3.1631E6	9.4288E5	7.3981E6	8.72E6	4.4905E5			6.2359E6	6.2426E6	2.5794E6	1.4792E6	1.5587E6		1.1338E6	4.8222E5	1.5137E6	6.8593E5	1.7933E6	0	2.4234E6	5.063E6			5.1333E5	0	2.2453E6	1.7226E6	1.1363E6	0	9	F9:22686	4312_01.raw	22	1	1	1	1
4	3	P21333|FLNA_HUMAN	A.SLPVEFTIDAK.D	Y	48.67	1218.6495	11	1.0	610.3326	2	46.98		1.5168E7	1.4595E7	2.9358E7	3.511E7	2.8112E6	2.8511E6	2.6534E6	4.905E7	4.4388E7	4.7865E7			9.108E6	3.1627E7	2.4997E7	2.42E7	3.6417E7	3.3601E7	3.3516E7	1.3653E7	1.7648E7				1.8861E7	1.8578E7	1.7978E7	1.7584E7	2.1962E7	11	F11:15933	4312_03.raw	24	0	1	1	1
4	3	P21333|FLNA_HUMAN	K.IEC(+57.02)DDKGDGSC(+57.02)DVR.Y	N	48.41	1624.6458	14	0.8	542.5563	3	14.22																										1.2332E6	1.1381E6	9.9207E5			27	F27:3620	6401_02.raw	3	0	0	0	0
4	3	P21333|FLNA_HUMAN	R.EEGPYEVEVTYDGVP(+15.99)VPGSPFPLEAVAPTKPSK.V	Y	48.40	3500.7236	33	7.4	876.1946	4	60.27			0		0																										5	F5:20229	3484_03_r.raw	0	0	0	0	0
4	3	P21333|FLNA_HUMAN	R.ALTQTGGPHVK.A	Y	48.30	1107.6036	11	0.4	554.8093	2	15.78	3.1808E7	2.8752E7	3.0171E7	3.7989E7	3.8706E7		2.1046E6	1.5195E6				3.8292E7	3.9155E7	3.8282E7			2.6223E6	8.6733E7	7.7214E7	7.6031E7	3.2756E7	4.3099E7				6.0991E7	6.5023E7	7.0442E7			20	F20:4095	4484_03.raw	26	1	1	1	1
4	3	P21333|FLNA_HUMAN	R.VGEPGHGGDPGLV.S	Y	48.19	1189.5728	13	1.1	595.7943	2	27.75						7.2131E7	6.4565E7	6.4581E7			2.3961E7				1.827E8	1.5079E8	1.7068E8	2.4792E7													7	F7:8822	3849_02.raw	8	0	0	0	0
4	3	P21333|FLNA_HUMAN	A.SSPIPVVISQSEIGDASR.V	Y	48.06	1840.9530	18	5.6	921.4889	2	46.57																		0					4.3356E5								23	F23:15254	6313_01.raw	1	0	0	0	0
4	3	P21333|FLNA_HUMAN	K.GLVEPVDVVDN(+.98)ADGTQTVNYVPSR.E	Y	48.04	2544.2344	24	3.8	849.0886	3	46.75	0																					1.7714E6						0			22	F22:15773	5289_03_r.raw	1	0	0	0	0
4	3	P21333|FLNA_HUMAN	W.GPGLEGGVVGK.S	Y	47.98	968.5291	11	0.5	485.2720	2	24.63									4.9599E6	5.5902E6	6.4156E6				2.2712E7	2.493E7	2.3039E7	8.8518E6	8.1585E6	8.0791E6									3.1896E7	3.0115E7	15	F15:7773	4406_01.raw	11	0	0	0	0
4	3	P21333|FLNA_HUMAN	S.LPVEFTIDAK.D	Y	47.61	1131.6176	10	1.5	566.8169	2	46.13				2.0928E6	2.5959E6				4.7123E6	4.6556E6	4.6915E6				1.2765E7	1.1875E7	1.2645E7	4.8205E6	4.8415E6	5.0245E6									8.1287E6	8.2937E6	16	F16:15777	4406_02.raw	13	0	0	0	1
4	3	P21333|FLNA_HUMAN	K.WGDEHIPGSPYR.V	Y	47.45	1412.6472	12	1.9	471.8906	3	33.39	1.0594E7	8.6735E6	1.0042E7	2.6158E7	2.616E7	8.7089E6	7.5453E6	8.2189E6	3.567E7	3.5623E7	3.8046E7				8.9059E7	8.8323E7	9.2017E7	2.6131E7	2.462E7	2.5765E7	1.4231E7	1.7389E7		4.5093E6		1.4614E7	1.3832E7	1.2997E7	1.5367E7	1.4561E7	7	F7:10882	3849_02.raw	28	1	1	1	1
4	3	P21333|FLNA_HUMAN	K.AEISC(+57.02)TDNQDGTC(+57.02)SVSYLPVLPGDYSILVK.Y	Y	47.32	3300.5530	30	3.6	1101.1956	3	64.98	4.2284E5	8.1626E5	5.6633E5		0																					7.1098E5					3	F3:21895	3399_03.raw	4	1	1	1	0
4	3	P21333|FLNA_HUMAN	A.ADIPINISETDLSLLTATVVPPSGR.E	Y	47.32	2578.3853	25	0.8	860.4697	3	71.53									2.9872E5	5.5342E5	6.2766E5				3.9564E5	2.5956E5	2.8956E5			2.3894E5						4.0815E5	3.8544E5	3.2824E5		2.7595E5	11	F11:24183	4312_03.raw	11	0	0	0	0
4	3	P21333|FLNA_HUMAN	F.ADTHIPGSPFK.A	Y	47.32	1168.5876	11	-1.1	390.5361	3	30.49	5.3609E6	5.0454E6	4.7326E6	1.2707E7	1.18E7	2.993E7	2.4496E7	2.6349E7	2.6252E7	2.7442E7	3.5193E7	1.7794E6	1.8134E6	1.7521E6	8.3638E7	7.0454E7	7.5117E7	1.5357E7	1.6287E7	1.3388E7	1.959E6	3.0934E6	2.5068E6	2.4259E6	2.5811E6	2.111E6	2.482E6	1.9585E6	1.0299E7	1.0228E7	16	F16:10024	4406_02.raw	39	1	1	1	1
4	3	P21333|FLNA_HUMAN	K.YTPVQQGPVGVNV.T	Y	47.08	1356.7037	13	2.3	679.3607	2	40.81						6.237E6	6.2389E6	6.4133E6							1.1806E7	7.3323E6															6	F6:13521	3849_01.raw	5	0	0	0	0
4	3	P21333|FLNA_HUMAN	V.YVEDPAGHQEEAK.V	Y	47.05	1471.6578	13	0.0	491.5599	3	15.51															6.9965E6	7.3338E6	6.4889E6														16	F16:3983	4406_02.raw	3	0	0	0	0
4	3	P21333|FLNA_HUMAN	F.SVAVSPSLDLSK.I	Y	47.02	1201.6554	12	1.8	601.8361	2	35.34	3.7941E6	2.9231E6	3.738E6	8.9992E6	8.724E6	1.5925E7	1.6869E7	1.472E7	1.1878E7	1.2172E7	1.4296E7	3.2311E6	4.4791E6	3.2527E6	3.0219E7	2.6976E7	2.653E7	2.0413E7	1.9293E7	2.4091E7	2.4223E6	3.2734E6	4.6285E6	5.1881E6	3.9577E6	7.4352E6	7.3665E6	7.1607E6	2.4721E7	2.6286E7	29	F29:11384	6474_01.raw	30	1	1	1	1
4	3	P21333|FLNA_HUMAN	V.AYVPDVTGR.Y	Y	47.01	976.4977	9	-1.3	489.2555	2	28.20	7.7267E6	5.9463E6	7.8348E6	2.7019E7	2.7525E7	2.8967E7	2.3234E7	2.4148E7	1.0339E8	1.0587E8	1.0236E8	2.1603E6			9.3939E7	8.1063E7	7.956E7	2.1385E7	2.3956E7	2.3395E7	4.2534E6	5.946E6	3.2578E6	3.3929E6	2.7852E6	5.6661E6	5.9625E6	5.7128E6			7	F7:8930	3849_02.raw	26	1	1	1	1
4	3	P21333|FLNA_HUMAN	Y.LPVLPGDYSILVK.Y	Y	46.89	1412.8279	13	2.0	707.4226	2	58.17															1.7641E7	1.239E7	1.1317E7												2.8995E6	2.902E6	17	F17:19756	4406_03.raw	5	0	0	0	0
4	3	P21333|FLNA_HUMAN	Y.VEDPAGHQEEAK.V	Y	46.81	1308.5946	12	-0.2	655.3044	2	13.87						1.4415E7	1.0409E7	1.226E7							1.3161E7	1.0545E7	9.1927E6														16	F16:3335	4406_02.raw	12	0	0	0	0
4	3	P21333|FLNA_HUMAN	F.GPGLQGGSAGSPAR.F	Y	46.79	1210.6053	14	1.7	606.3110	2	16.47															1.3093E7	1.0746E7	1.9118E7	4.2559E6	6.8469E6	4.1851E6									1.3529E7	1.2607E7	30	F30:4434	6474_02.raw	10	0	0	0	0
4	3	P21333|FLNA_HUMAN	L.PVEFTIDAK.D	Y	46.76	1018.5334	9	1.7	510.2749	2	46.98									1.0804E6	9.9214E5	1.0125E6						5.8268E5	8.0053E5	7.7373E5	7.1769E5									3.6939E5	3.2989E5	11	F11:15921	4312_03.raw	9	0	0	0	0
4	3	P21333|FLNA_HUMAN	K.PAEFTVDAK.H	Y	46.72	976.4865	9	3.7	489.2523	2	25.06									1.2863E6	1.1688E6	1.091E6						2.7445E6	1.1457E6	1.733E6	7.9367E5						3.602E5		3.683E5			11	F11:7927	4312_03.raw	9	0	0	0	0
4	3	P21333|FLNA_HUMAN	I.ANLQTDLSDGLR.L	Y	46.57	1301.6575	12	1.8	651.8372	2	38.69				5.2029E6	4.5171E6	2.8462E6	2.9705E6	2.9378E6	1.1063E7	1.0101E7	1.0779E7		3.4069E5		8.7475E6	1.0115E7	1.0981E7	5.614E6	5.9737E6	6.1299E6			2.6811E6	2.7436E6	2.6219E6	2.5966E6	1.8181E6	2.1739E6	1.102E6	1.4566E6	15	F15:13234	4406_01.raw	23	0	0	0	1
4	3	P21333|FLNA_HUMAN	A.QGPGLEPSGNIANK.T	Y	46.47	1380.6997	14	1.7	691.3583	2	25.32																5.8917E6	5.1486E6	2.2129E6		2.654E6											17	F17:7994	4406_03.raw	4	0	0	0	0
4	3	P21333|FLNA_HUMAN	K.AEISFEDR.K	Y	46.43	965.4454	8	-0.1	483.7299	2	28.62	5.0936E7	4.6193E7	5.1694E7	6.7242E7	6.4859E7	2.0107E7	1.8135E7	1.7634E7	8.0736E7	8.3571E7	8.8868E7	3.4021E7	3.5107E7	3.2323E7	5.0774E7	4.4556E7	4.448E7	7.8136E7	8.684E7	8.715E7	6.8804E7	9.356E7	2.2083E7	1.9489E7	2.0589E7	7.9763E7	7.7117E7	7.3536E7			16	F16:9245	4406_02.raw	28	1	1	1	1
4	3	P21333|FLNA_HUMAN	L.GFSVEGPSQAK.I	Y	46.18	1105.5403	11	-0.6	553.7771	2	24.69													1.2478E6		1.3414E7	1.0458E7	1.9152E7	9.843E6	9.3971E6	7.708E6											20	F20:7527	4484_03.raw	7	0	0	0	0
4	3	P21333|FLNA_HUMAN	S.VLYGDEEVPR.S	Y	46.13	1175.5822	10	0.2	588.7985	2	29.63										1.747E6					2.0216E7	1.6477E7	1.6293E7		2.9979E6	3.5245E6									3.872E6	3.9354E6	15	F15:9809	4406_01.raw	8	0	0	0	0
4	3	P21333|FLNA_HUMAN	R.AYGPGIEP(+15.99)TGNMVK.K	Y	46.09	1448.6969	14	2.3	725.3574	2	26.38													4.0456E6	0	8.7843E6	6.3495E6	9.3578E6	1.2349E7	1.24E7	1.6002E7	4.9587E6	6.6937E6						7.3833E6	1.5911E6	2.35E6	20	F20:8188	4484_03.raw	12	0	0	0	0
4	3	P21333|FLNA_HUMAN	K.FN(+.98)EEHIPDSPFVVPVASPSGDAR.R	Y	46.07	2467.1655	23	9.5	1234.6018	2	50.79					5.8687E5					0									0												19	F19:16905	4484_02.raw	1	0	0	0	0
4	3	P21333|FLNA_HUMAN	A.AGAAPGGGVDTR.D	Y	45.96	1027.5046	12	0.3	514.7598	2	14.75							5.3458E6					7.5244E6	6.0739E6	6.429E6	2.5872E7	2.3373E7	2.4211E7	8.6591E6	8.2657E6	1.1581E7									1.7328E6	1.731E6	16	F16:3722	4406_02.raw	12	0	0	0	0
4	3	P21333|FLNA_HUMAN	R.LLGWIQNK.L	N	45.76	970.5600	8	0.7	486.2876	2	41.98	2.1627E7	2.0106E7	2.0023E7	2.1224E7	2.411E7	1.4264E7	1.0341E7	1.1037E7	2.1375E7	2.012E7	2.0893E7	6.4508E6	7.0945E6	6.2518E6	1.4177E7	1.084E7	1.1415E7	2.1976E7	2.2537E7	1.9147E7	2.0479E7	2.6753E7	7.5291E6	7.0014E6	7.7123E6	2.3859E7	2.5843E7	2.3188E7	3.8255E6	3.3133E6	24	F24:13631	6313_02.raw	30	1	1	1	1
4	3	P21333|FLNA_HUMAN	R.FGGEHVPN(+.98)SPFQVTALAGDQPSVQPPLR.S	Y	45.58	2945.4670	28	7.7	982.8372	3	52.99																	0									0					26	F26:17644	6401_01.raw	0	0	0	0	0
4	3	P21333|FLNA_HUMAN	Y.GGQPVPNFPSK.L	Y	45.46	1126.5770	11	3.2	564.2976	2	27.53									0		0				1.5675E7	1.5108E7	1.3406E7			0									8.1399E6	7.5378E6	29	F29:8533	6474_01.raw	5	0	0	0	0
4	3	P21333|FLNA_HUMAN	R.LSPFM(+15.99)ADIR.D	Y	45.30	1064.5325	9	2.2	533.2747	2	37.47		3.0794E6	3.0868E6		1.989E6			2.7336E5				1.7443E6	1.5561E6	1.2184E6				2.13E6	1.9521E6	2.0446E6	7.1661E6	8.8217E6		4.9811E5	3.4126E5	4.676E6	4.6197E6	3.9841E6			28	F28:12264	6401_03.raw	17	0	1	1	0
4	3	P21333|FLNA_HUMAN	V.NVTYGGDPIPK.S	Y	45.06	1159.5873	11	1.0	580.8015	2	28.92						1.6695E7	1.4282E7	1.1406E7	9.1506E6	8.3124E6	9.3055E6				6.3948E7	5.251E7	5.2211E7	1.0415E7	9.5886E6	1.176E7									0		17	F17:9397	4406_03.raw	12	0	0	0	0
4	3	P21333|FLNA_HUMAN	K.VEYTPYEEGLHSVDV.T	Y	44.93	1735.7941	15	1.7	868.9058	2	46.01										4.5711E6	4.0812E6				1.3859E7	1.1562E7	1.2694E7														16	F16:15735	4406_02.raw	5	0	0	0	0
4	3	P21333|FLNA_HUMAN	D.APQDFHPDR.V	Y	44.81	1081.4940	9	0.6	361.5055	3	16.56				1.0431E7	1.0019E7	6.4689E6	7.0657E6	5.9899E6	1.9077E6	0	2.2207E6	5.9233E6	5.4198E6	5.1199E6	5.4527E7	5.1618E7	4.8281E7	2.3311E7	2.2582E7	2.1867E7	6.3216E5	1.256E6	4.6528E6	4.3006E6	4.8005E6	4.9146E7	4.9824E7	4.6328E7	4.801E7	4.4922E7	17	F17:4491	4406_03.raw	26	0	0	0	1
4	3	P21333|FLNA_HUMAN	R.TGVELGKPTHFTV.N	Y	44.77	1384.7350	13	0.0	462.5856	3	38.59						1.5923E7	1.4673E7	1.4876E7	9.5862E6		8.2498E6				4.3551E7	3.325E7	3.5459E7		1.179E7	1.17E7											7	F7:12749	3849_02.raw	10	0	0	0	0
4	3	P21333|FLNA_HUMAN	K.PGAPLRPK.L	Y	44.72	834.5075	8	-0.1	418.2610	2	16.46	6.3201E6	6.2878E6	7.7869E6	5.3126E6	6.0017E6	4.3422E6	4.8815E6	6.2087E6	2.4385E6	2.6132E6	2.3487E6	6.2334E6	6.647E6	3.8004E6		2.1643E5		6.0546E6	5.7827E6	5.4463E6	6.3072E6	7.7033E6	3.1817E6	3.2378E6	2.615E6	9.3045E6	9.5638E6	1.016E7			19	F19:4392	4484_02.raw	28	1	1	1	1
4	3	P21333|FLNA_HUMAN	Y.SISVLYGDEEVPR.S	Y	44.68	1462.7303	13	1.3	732.3734	2	40.67												6.5306E5			2.0311E6		2.1471E6												3.6975E6	3.3074E6	29	F29:13280	6474_01.raw	5	0	0	0	0
4	3	P21333|FLNA_HUMAN	E.TGEHLVHVK.K	Y	44.66	1018.5560	9	0.6	510.2856	2	15.44															1.6572E6	2.4958E6	2.5087E6												6.4282E5	3.9705E5	15	F15:4025	4406_01.raw	7	0	0	0	0
4	3	P21333|FLNA_HUMAN	P.AEADIDFDIIR.N	Y	44.62	1276.6299	11	2.5	639.3238	2	50.36																													1.1606E6	1.1635E6	29	F29:16586	6474_01.raw	2	0	0	0	0
4	3	P21333|FLNA_HUMAN	L.DVQFSGLTK.G	Y	44.59	993.5131	9	0.3	497.7640	2	33.90	1.8274E6	1.6523E6		3.8334E7	3.7403E7	1.8238E7	1.6331E7	1.6737E7	3.5381E7	3.7605E7	3.8967E7	2.9436E6	2.3239E6	2.567E6	1.4413E8	1.3392E8	1.2052E8	9.0184E7	1.0089E8	9.7014E7	0	2.7068E6	2.41E7	2.2328E7	2.0865E7	1.2883E7	1.1196E7	1.3465E7	9.491E7	9.7582E7	15	F15:11423	4406_01.raw	28	1	1	0	1
4	3	P21333|FLNA_HUMAN	V.VQEPGDYEVSVK.F	Y	44.56	1348.6510	12	2.3	675.3344	2	28.73															4.1383E7	3.4446E7	3.8331E7														16	F16:9353	4406_02.raw	3	0	0	0	0
4	3	P21333|FLNA_HUMAN	K.AGVAPLQVK.V	Y	44.47	881.5334	9	1.9	441.7748	2	25.97	9.3891E7	8.656E7	9.4373E7	8.1731E7	8.9574E7	1.7106E7	1.5993E7	1.4407E7	5.1438E7	5.3368E7	5.4928E7	5.8019E7	6.3124E7	5.1371E7	3.4804E7	3.2893E7	3.5029E7	1.0375E8	1.0686E8	1.1125E8	1.0543E8	1.4431E8	4.9924E7	5.2606E7	4.759E7	1.2606E8	1.2667E8	1.21E8	1.2532E7	1.3441E7	24	F24:7958	6313_02.raw	30	1	1	1	1
4	3	P21333|FLNA_HUMAN	R.LTVSSLQESGLK.V	Y	44.35	1260.6925	12	-0.6	631.3531	2	35.23																					4.5246E6	6.706E6				4.5518E6	4.248E6	3.5076E6			22	F22:11653	5289_03_r.raw	5	0	0	0	0
4	3	P21333|FLNA_HUMAN	K.FNEEHIPDSPF.V	Y	44.21	1330.5829	11	0.5	666.2991	2	44.72					2.1269E6	2.0109E7	1.6866E7	1.8297E7							1.2452E7	1.0952E7	1.0357E7	5.5032E6	5.3758E6	6.0623E6											19	F19:14828	4484_02.raw	10	0	0	0	0
4	3	P21333|FLNA_HUMAN	I.SVLYGDEEVPR.S	Y	44.20	1262.6143	11	0.9	632.3149	2	32.36				3.1292E6	2.7402E6	2.0529E6	0	1.769E6		0					4.0033E7	2.9939E7	3.4479E7	5.2042E6	8.8582E6	3.7657E6									3.9811E6	4.2128E6	17	F17:10784	4406_03.raw	12	0	0	0	1
4	3	P21333|FLNA_HUMAN	Q.SGTTNKPNK.F	Y	44.17	945.4879	9	0.4	473.7514	2	14.52					0					1.2681E6					4.1888E6	5.3052E6	4.7944E6	3.234E6	3.8203E6	3.3911E6				9.3164E5					1.4781E6	1.1344E6	20	F20:3637	4484_03.raw	10	0	0	0	0
4	3	P21333|FLNA_HUMAN	T.FAGVPIPR.S	Y	44.10	855.4966	8	-0.7	428.7553	2	38.71						2.1079E6	2.0824E6	2.0734E6	3.1281E6	2.7455E6					8.2752E6	6.6056E6	6.9089E6		1.3559E6												7	F7:12696	3849_02.raw	9	0	0	0	0
4	3	P21333|FLNA_HUMAN	S.WGGVSIPNSPFR.V	Y	43.99	1315.6672	12	0.7	658.8414	2	51.34															4.5505E6	3.9458E6	3.7847E6														15	F15:17708	4406_01.raw	3	0	0	0	0
4	3	P21333|FLNA_HUMAN	R.N(+.98)DNDTFTVK.Y	N	43.77	1053.4614	9	0.0	527.7380	2	27.13										2.4382E6					0	9.1138E6	8.0716E6														15	F15:8785	4406_01.raw	3	0	0	0	0
4	3	P21333|FLNA_HUMAN	A.DIPINISETDLSLLTATVVPPSGR.E	Y	43.63	2507.3481	24	3.4	836.7928	3	72.71				9.9241E4	1.2769E5				6.9496E5	0	4.1762E5																				9	F9:24470	4312_01.raw	4	0	0	0	1
4	3	P21333|FLNA_HUMAN	A.NLPQSFQVDTSK.A	Y	43.45	1362.6780	12	-1.2	682.3455	2	33.76															6.1379E6		4.5488E6	1.921E7	2.164E7	2.1463E7				1.7899E6					1.3732E7	1.6401E7	19	F19:10948	4484_02.raw	8	0	0	0	0
4	3	P21333|FLNA_HUMAN	E.AGQGDVSIGIK.C	N	43.40	1043.5610	11	2.0	522.7888	2	27.78									3.9043E6	4.0237E6	3.9421E6				1.4935E7	1.3578E7	1.3463E7	2.5854E6	2.9103E6												15	F15:9024	4406_01.raw	8	0	0	0	0
4	3	P21333|FLNA_HUMAN	V.TYGGDPIPK.S	N	43.36	946.4760	9	0.5	474.2455	2	23.71								0							0	0	0														17	F17:7319	4406_03.raw	0	0	0	0	0
4	3	P21333|FLNA_HUMAN	K.N(+.98)GQHVASSPIPVVISQSEIGDASR.V	Y	43.35	2448.2244	24	2.2	817.0839	3	46.57																						4.6094E5									22	F22:15662	5289_03_r.raw	1	0	0	0	0
4	3	P21333|FLNA_HUMAN	L.RN(+.98)GHVGISFVPK.E	Y	43.31	1310.7095	12	-0.1	437.9104	3	30.62																		1.853E6													18	F18:9745	4484_01.raw	1	0	0	0	0
4	3	P21333|FLNA_HUMAN	Y.GGHQVPGSPFK.V	Y	43.29	1109.5618	11	-0.8	370.8609	3	22.99															1.8193E7	1.6208E7	1.6136E7														17	F17:7009	4406_03.raw	6	0	0	0	0
4	3	P21333|FLNA_HUMAN	L.AGDQPSVQPPLR.S	Y	43.21	1263.6571	12	1.1	632.8365	2	26.45										1.0048E7									1.1005E7	1.0521E7											10	F10:8437	4312_02.raw	3	0	0	0	0
4	3	P21333|FLNA_HUMAN	Q.SAAGAAPGGGVDTR.D	Y	43.16	1185.5737	14	1.5	593.7950	2	15.15				3.0883E6	2.4616E6				4.4097E6								6.9399E6		7.7714E6									1.6936E6			9	F9:3986	4312_01.raw	6	0	0	0	1
4	3	P21333|FLNA_HUMAN	K.GEYTLVVK.W	Y	43.07	907.5015	8	-0.3	454.7579	2	31.03	3.3055E6	2.539E6		5.8928E6	6.3613E6	1.9115E6	2.6854E6	2.565E6	2.8114E7	2.6638E7	3.1394E7				4.9335E7	4.5369E7	3.7138E7		3.9244E6	3.9617E6	3.3157E6									3.8592E6	16	F16:10191	4406_02.raw	17	1	1	0	1
4	3	P21333|FLNA_HUMAN	E.ATTEFSVDAR.A	Y	42.91	1095.5197	10	1.3	548.7678	2	25.95																		1.7458E7	1.7572E7	1.7036E7			7.8473E6			5.8829E7	5.4262E7	5.4513E7	8.5783E6	9.6324E6	26	F26:8050	6401_01.raw	9	0	0	0	0
4	3	P21333|FLNA_HUMAN	F.ADQATPTSPIR.V	Y	42.88	1155.5884	11	0.2	578.8016	2	21.50						0	0	0	1.2494E7	0	1.4598E7				1.6707E7	1.5344E7	1.4752E7	0					0						0	0	17	F17:6347	4406_03.raw	5	0	0	0	0
4	3	P21333|FLNA_HUMAN	V.EAIGDDVGTLGFSVEGPSQAK.I	Y	42.87	2076.0010	21	2.2	1039.0100	2	49.58															7.3514E5																15	F15:17128	4406_01.raw	1	0	0	0	0
4	3	P21333|FLNA_HUMAN	K.FNEEHIPDSPFVVPV.A	Y	42.83	1724.8409	15	1.0	863.4286	2	60.00				1.7116E7	2.1194E7	1.3256E7		0	2.3787E7	2.6888E7	2.2797E7				8.198E7	6.3519E7	7.448E7	2.988E7	2.4448E7	2.8477E7						5.8985E6			1.1615E7	1.0984E7	10	F10:20197	4312_02.raw	15	0	0	0	1
4	3	P21333|FLNA_HUMAN	R.FGGEHVPNSPFQV.T	Y	42.69	1413.6677	13	1.0	707.8419	2	45.20		1.5885E6		8.6662E6	7.9505E6		5.6999E6	0	1.9169E7	1.7597E7	1.9672E7				4.1704E7	3.8654E7	3.8616E7			1.4835E7											9	F9:15235	4312_01.raw	11	0	1	0	1
4	3	P21333|FLNA_HUMAN	K.VGSAADIP(+15.99)INISETDLSLLTATVVPPSGR.E	Y	42.68	2908.5393	29	9.1	970.5292	3	74.27										0														0			0				10	F10:24999	4312_02.raw	0	0	0	0	0
4	3	P21333|FLNA_HUMAN	T.YGGDPIPK.S	N	42.61	845.4283	8	0.2	423.7215	2	22.11															3.1458E7	2.886E7	2.6863E7														15	F15:6723	4406_01.raw	3	0	0	0	0
4	3	P21333|FLNA_HUMAN	K.YGGDEIPFSPYR.V	Y	42.21	1399.6407	12	2.2	700.8292	2	44.05						1.7686E7	1.54E7		7.713E7	6.5081E7		1.8981E7				1.0251E8		6.386E7	6.0625E7	6.8145E7										3.9901E7	19	F19:14622	4484_02.raw	10	0	0	0	0
4	3	P21333|FLNA_HUMAN	K.TGVAVNKPAEFTV.D	Y	42.05	1331.7085	13	2.5	666.8632	2	39.03				3.3524E6	3.4636E6	3.7909E6	4.1689E6	3.3559E6	3.3182E6	3.2199E6	3.7813E6				2.2922E7	1.7259E7	1.8384E7	1.1585E7	1.2888E7	1.3483E7									3.3063E6	3.7957E6	15	F15:13419	4406_01.raw	16	0	0	0	1
4	3	P21333|FLNA_HUMAN	A.NLQTDLSDGLR.L	N	42.04	1230.6204	11	1.3	616.3182	2	40.51				0	0				1.4749E7	2.4025E7	1.5225E7				0	0	0	0	0	0					0				0	0	17	F17:13807	4406_03.raw	3	0	0	0	0
4	3	P21333|FLNA_HUMAN	R.VANPSGNLTETYVQDRG.D	Y	42.03	1819.8700	17	1.2	910.9434	2	31.81		1.275E7	1.4856E7																				2.3146E7	2.2257E7	2.1351E7						23	F23:10026	6313_01.raw	5	0	1	1	0
4	3	P21333|FLNA_HUMAN	K.N(+.98)GQHVASSPIPV.V	Y	41.99	1205.6040	12	0.7	603.8097	2	34.44				9.3995E6	7.8892E6	4.878E6	4.0528E6	4.7661E6										1.6571E7	1.9716E7	1.9307E7						3.477E6		3.5708E6	8.3668E6	9.0936E6	20	F20:11189	4484_03.raw	12	0	0	0	1
4	3	P21333|FLNA_HUMAN	A.PQDFHPDR.V	Y	41.95	1010.4570	8	1.5	506.2365	2	18.41				0					0								2.6154E6	1.7223E7	1.8383E7	1.6787E7									2.3948E6	1.2294E6	20	F20:5107	4484_03.raw	6	0	0	0	0
4	3	P21333|FLNA_HUMAN	V.GSAADIPINISETDLSLLTATVVPPSGR.E	Y	41.90	2793.4758	28	-0.3	932.1656	3	73.69									8.03E5	7.6784E5	8.4327E5																				9	F9:24760	4312_01.raw	3	0	0	0	0
4	3	P21333|FLNA_HUMAN	K.DKGEYTLVVK.W	Y	41.66	1150.6233	10	0.5	576.3192	2	28.39															5.1358E6		5.4864E6			3.0152E6											17	F17:9172	4406_03.raw	3	0	0	0	0
4	3	P21333|FLNA_HUMAN	K.LPQLPITNF.S	Y	41.48	1041.5858	9	0.7	521.8005	2	62.19	2.6296E6	2.3388E6	2.3961E6	5.1096E6	7.1798E6				2.6455E6	2.5291E6	2.6079E6							4.1538E6	2.8086E6	3.4913E6	2.3654E6		1.49E6	1.4519E6	1.1217E6		0	3.4376E6	4.3539E6	3.7907E6	4	F4:20883	3484_02.raw	18	1	1	1	1
4	3	P21333|FLNA_HUMAN	V.AQPTITDNK.D	Y	41.29	986.5032	9	0.7	494.2592	2	15.52						2.3578E6	2.392E6	0							2.3693E7	1.6308E7	2.0746E7	2.2449E6	2.1927E6	3.0056E6											17	F17:4003	4406_03.raw	8	0	0	0	0
4	3	P21333|FLNA_HUMAN	V.SVALEFLDR.E	N	41.17	1048.5553	9	2.3	525.2861	2	48.80						4.4143E5	9.561E5	6.4996E5	4.7977E6	4.9926E6	5.0599E6				1.3819E7	1.0806E7	1.0419E7	1.3542E6		1.1039E6									1.295E6	7.3915E5	16	F16:16658	4406_02.raw	13	0	0	0	0
4	3	P21333|FLNA_HUMAN	R.EEPC(+57.02)LLK.R	N	41.02	887.4422	7	0.4	444.7285	2	26.18	3.8007E7	3.5351E7	3.8365E7	5.8656E7	6.062E7	2.4248E7	2.4383E7	2.2777E7				2.1208E7	2.4287E7	2.0131E7	1.2394E8	1.0157E8	1.0648E8	4.1079E7	4.3886E7	4.4772E7	3.1751E7	4.4535E7	2.6219E7	2.4541E7	2.3964E7	5.6248E7	5.7852E7	5.4773E7	3.401E7	3.467E7	25	F25:7945	6313_03.raw	27	1	1	1	1
4	3	P21333|FLNA_HUMAN	K.LK(+114.04)PGAPLRPK.L	Y	40.95	1189.7295	10	1.0	397.5842	3	24.31	2.533E6	2.9372E6	2.9789E6						2.0265E6														8.2845E6	8.7806E6	7.751E6						3	F3:7662	3399_03.raw	7	1	1	1	0
4	3	P21333|FLNA_HUMAN	A.DTHIPGSPFK.A	Y	40.83	1097.5505	10	1.9	366.8582	3	30.66															2.0084E7	1.6889E7	1.5507E7	1.0652E6	1.1292E6										3.5801E6	4.5646E6	29	F29:9631	6474_01.raw	7	0	0	0	0
4	3	P21333|FLNA_HUMAN	R.TGVELGK(+114.04)PTHFTVNAK.A	Y	40.77	1811.9529	16	1.2	453.9960	4	28.80	1.6213E7	8.7368E6	1.0835E7	8.5157E6	0				6.8299E6	8.5874E6	1.529E7	5.7605E6		3.4451E6				5.09E6	9.8629E6	6.7909E6			3.9549E7	4.8742E7	5.4256E7	7.108E6	7.1948E6	5.7081E6			27	F27:9181	6401_02.raw	28	2	1	2	2
4	3	P21333|FLNA_HUMAN	K.VEPGLGADN(+.98)SVVR.F	Y	40.74	1312.6622	13	2.6	657.3401	2	30.91																	6.2848E5														17	F17:10184	4406_03.raw	1	0	0	0	0
4	3	P21333|FLNA_HUMAN	S.SFTVDC(+57.02)SK.A	N	40.72	942.4117	8	0.9	472.2136	2	20.59				3.8955E6	3.4119E6			1.8481E6							1.5908E7	1.6357E7	1.6286E7	8.8569E6	8.3021E6	8.8008E6						2.5606E6		2.2285E6	6.8014E6	5.9105E6	17	F17:6040	4406_03.raw	13	0	0	0	1
4	3	P21333|FLNA_HUMAN	F.N(+.98)GTHIPGSPFK.I	Y	40.41	1154.5720	11	1.3	385.8651	3	33.18															1.9785E7	1.6419E7	1.5126E7												3.0228E6		15	F15:11144	4406_01.raw	7	0	0	0	0
4	3	P21333|FLNA_HUMAN	V.DIIDHHDNTYTVK.Y	Y	40.33	1569.7423	13	1.5	524.2555	3	29.98				8.8146E5														1.2044E6													4	F4:9729	3484_02.raw	2	0	0	0	1
4	3	P21333|FLNA_HUMAN	T.GEHLVHVK.K	Y	40.30	917.5083	8	-1.0	459.7610	2	16.25		8.6757E5		1.7233E6												2.8303E6	3.3034E6		4.3832E6		1.4547E6	1.7266E6				1.4408E6	1.8869E6	1.7507E6		4.2421E5	19	F19:4345	4484_02.raw	11	0	1	0	1
4	3	P21333|FLNA_HUMAN	S.AAGAAPGGGVDTR.D	Y	40.25	1098.5417	13	0.3	550.2783	2	14.62					2.066E6							1.555E6			7.4595E6	7.3643E6											1.4797E6			1.8626E6	5	F5:3766	3484_03_r.raw	6	0	0	0	0
4	3	P21333|FLNA_HUMAN	F.DLVIPFTIK.K	Y	40.06	1044.6219	9	-0.7	523.3179	2	58.61									7.6423E5	7.575E5	8.7638E5				9.206E5	6.8303E5	6.7291E5														11	F11:19807	4312_03.raw	6	0	0	0	0
4	3	P21333|FLNA_HUMAN	A.SFAVSLNGAK.G	Y	39.96	992.5291	10	1.5	497.2725	2	33.05	2.5522E6	2.8134E6	2.0649E6		0							2.5896E6	2.7543E6	2.3434E6							0	2.8061E6		0		3.8218E6	3.7942E6	0			28	F28:10706	6401_03.raw	9	1	1	1	0
4	3	P21333|FLNA_HUMAN	E.PGLGADNSVVR.F	Y	39.90	1083.5673	11	-3.7	542.7889	2	29.36													9.9445E5							2.4279E6											13	F13:9167	4371_02.raw	2	0	0	0	0
4	3	P21333|FLNA_HUMAN	A.DIPIN(+.98)ISETDLSLLTATVVPPSGR.E	Y	39.72	2508.3323	24	8.7	837.1253	3	72.47									0																						9	F9:24383	4312_01.raw	0	0	0	0	0
4	3	P21333|FLNA_HUMAN	A.TTEFSVDAR.A	Y	39.50	1024.4825	9	0.7	513.2489	2	25.15				3.5851E6	3.3524E6										2.6977E7	2.4173E7	2.3747E7	1.2046E7	1.2446E7	1.2126E7			2.6866E6			5.435E6	5.5289E6	5.2639E6	4.2452E7	4.6432E7	30	F30:7687	6474_02.raw	14	0	0	0	1
4	3	P21333|FLNA_HUMAN	K.KGEITGEVR.M	N	39.46	987.5349	9	0.8	494.7751	2	15.45						2.0078E6	2.3741E6	2.2973E6																							7	F7:4007	3849_02.raw	3	0	0	0	0
4	3	P21333|FLNA_HUMAN	D.GSC(+57.02)GVAYVVQEPGDYEVSVK.F	Y	39.36	2141.9939	20	0.0	1072.0043	2	42.61																										1.1094E6					26	F26:14131	6401_01.raw	1	0	0	0	0
4	3	P21333|FLNA_HUMAN	Y.GGDEIPFSPYR.V	Y	39.24	1236.5774	11	0.3	619.2961	2	40.58				3.95E6					8.5198E6	7.4501E6	7.7455E6				1.8044E7	1.9358E7	2.0315E7		6.5088E6	6.3719E6											10	F10:13684	4312_02.raw	9	0	0	0	1
4	3	P21333|FLNA_HUMAN	R.ALTQTGGPHVK(+114.04).A	Y	39.18	1221.6465	11	-0.9	408.2224	3	15.24																								8.0792E6	7.2392E6						24	F24:3871	6313_02.raw	2	0	0	0	0
4	3	P21333|FLNA_HUMAN	K.GEITGEVR.M	N	38.91	859.4399	8	1.1	430.7277	2	17.24	5.3696E7	4.9113E7	5.7953E7	9.515E7	1.021E8	4.9967E7	4.8919E7	4.7612E7	7.8518E7	7.606E7	8.1025E7		4.0832E7		3.5372E8	3.2138E8	1.6257E8	1.583E8	1.3408E8	1.5494E8	6.2924E7	8.6595E7	4.6196E7	4.6871E7	3.6923E7	8.7133E7	9.8466E7		0	0	16	F16:4980	4406_02.raw	27	1	1	1	1
4	3	P21333|FLNA_HUMAN	K.LKPGAPLRPK.L	Y	38.84	1075.6865	10	1.0	359.5698	3	16.56	4.6787E7	4.3843E7	4.7107E7	3.4893E7	3.8243E7	3.7373E7	3.557E7	3.4352E7	2.0628E7	2.0317E7	2.1831E7	4.3967E7	3.7486E7	3.2997E7				4.2384E7	4.88E7	4.1091E7	4.353E7	6.032E7	1.9691E7	1.7801E7	1.7252E7	5.9635E7	6.7692E7	6.2219E7			20	F20:4483	4484_03.raw	25	1	1	1	1
4	3	P21333|FLNA_HUMAN	S.KLQVEPAVDT(+79.97)SGVQC(+57.02)YGPGIEGQGVFR.E	Y	38.75	2970.3945	27	-2.2	991.1366	3	53.33																		0													18	F18:17681	4484_01.raw	0	0	0	0	0
4	3	P21333|FLNA_HUMAN	T.VGPLGEGGAHK.V	N	38.72	1020.5352	11	-0.3	511.2747	2	16.59															9.5066E6	9.4917E6	9.2021E6														16	F16:4382	4406_02.raw	3	0	0	0	0
4	3	P21333|FLNA_HUMAN	R.FVPAEM(+15.99)GTHTVSVK.Y	Y	38.68	1517.7548	14	2.5	506.9268	3	23.93																8.9178E6															16	F16:7363	4406_02.raw	1	0	0	0	0
4	3	P21333|FLNA_HUMAN	G.LGLAVEGPSEAK.M	Y	38.61	1169.6292	12	0.1	585.8219	2	32.36															3.0488E6	3.6397E6	4.6234E6														16	F16:10751	4406_02.raw	3	0	0	0	0
4	3	P21333|FLNA_HUMAN	K.YNEQHVPGSPF.T	Y	38.60	1273.5728	11	1.8	637.7948	2	35.66					2.0178E6	6.1194E6	5.9671E6	6.02E6	2.3888E6	2.7513E6	2.3926E6				4.146E6	3.5634E6	3.4724E6	3.8213E6	4.0046E6	3.8783E6											17	F17:11974	4406_03.raw	13	0	0	0	0
4	3	P21333|FLNA_HUMAN	V.AVNKPAEFTVDAK.H	Y	38.53	1388.7300	13	-0.5	463.9170	3	25.54															1.2237E7	1.055E7	1.2094E7	3.9524E6	4.4317E6	4.2054E6											16	F16:8038	4406_02.raw	6	0	0	0	0
4	3	P21333|FLNA_HUMAN	S.VANVGSHC(+57.02)DLSLK.I	Y	38.50	1398.6925	13	2.1	467.2391	3	24.70																										4.0644E6	4.1928E6	3.2762E6			28	F28:7649	6401_03.raw	3	0	0	0	0
4	3	P21333|FLNA_HUMAN	L.TATVVPPSGR.E	Y	38.35	983.5400	10	-0.7	492.7769	2	18.39				3.8791E6		9.6555E6	9.3437E6	8.9878E6	7.7731E6	6.8792E6	8.1945E6				1.5824E7	1.5415E7	1.3888E7	7.1406E6	7.5762E6												16	F16:5140	4406_02.raw	12	0	0	0	1
4	3	P21333|FLNA_HUMAN	L.TQTGGPHVK.A	Y	38.32	923.4825	9	-1.2	462.7480	2	15.64	2.014E6	2.1623E6	0	0	0							2.6781E6		2.5672E6		2.0595E6	1.7452E6	5.6238E6	4.1772E6	5.9815E6	0	3.3945E6				3.6128E6	0	4.4074E6			18	F18:4047	4484_01.raw	12	1	1	0	0
4	3	P21333|FLNA_HUMAN	R.FIPRENGVYLIDVK.F	Y	38.02	1661.9141	14	1.1	554.9792	3	44.70																		2.0558E6	1.6496E6												18	F18:14774	4484_01.raw	2	0	0	0	0
4	3	P21333|FLNA_HUMAN	H.VVPC(+57.02)FDASK.V	Y	37.99	1021.4902	9	-0.6	511.7521	2	26.84															1.1791E7	5.419E6	6.9179E6												7.9607E6	2.3354E6	29	F29:8250	6474_01.raw	7	0	0	0	0
4	3	P21333|FLNA_HUMAN	A.EADIDFDIIR.N	Y	37.95	1205.5928	10	-0.5	603.8033	2	50.37																														1.2634E6	30	F30:16558	6474_02.raw	1	0	0	0	0
4	3	P21333|FLNA_HUMAN	P.VPSS(+203.08)P(+15.99)FQVPVTEGC(+57.02)DPSR.V	Y	37.87	2176.9946	18	-3.4	1089.5009	2	57.79													3.7841E5																		13	F13:19044	4371_02.raw	1	0	0	0	0
4	3	P21333|FLNA_HUMAN	K.IQQNTFTR.W	N	37.68	1006.5196	8	1.1	504.2676	2	18.56	3.351E7	3.2394E7	3.3211E7	3.3526E7	3.5194E7	3.139E7	2.9918E7	2.8122E7	3.935E7	3.7822E7	3.9083E7	2.6349E7	2.5931E7	2.0194E7				3.4327E7	3.4365E7	3.5393E7	3.3038E7	4.4875E7				4.7733E7	4.8261E7	4.575E7			20	F20:5168	4484_03.raw	22	1	1	1	1
4	3	P21333|FLNA_HUMAN	I.ALLEVLSQK.K	N	37.60	999.5964	9	1.8	500.8064	2	42.81						2.1029E6	1.5269E6	1.3658E6	1.7398E6	1.8192E6	1.6129E6				4.1181E6	3.1241E6	3.2085E6			4.7637E5											11	F11:14545	4312_03.raw	10	0	0	0	0
4	3	P21333|FLNA_HUMAN	K.FN(+.98)GTHIPGSPFK.I	Y	37.49	1301.6404	12	1.0	434.8878	3	39.53					8.7679E5					1.4893E6					1.9482E6		1.3439E6					1.572E6				1.0576E6					17	F17:13436	4406_03.raw	7	0	0	0	0
4	3	P21333|FLNA_HUMAN	A.DIDFDIIR.N	Y	37.43	1005.5131	8	-0.2	503.7637	2	51.99						3.8714E5	2.3371E5				5.4894E6				5.774E6	0	0	4.2904E5	5.0922E5	1.1854E6									4.0955E6	2.6799E6	29	F29:17119	6474_01.raw	10	0	0	0	0
4	3	P21333|FLNA_HUMAN	V.AVSPSLDLSK.I	Y	37.26	1015.5549	10	1.4	508.7855	2	30.93															4.7633E7	4.1913E7	4.3835E7														16	F16:10128	4406_02.raw	3	0	0	0	0
4	3	P21333|FLNA_HUMAN	D.LAEDAPWK.K	N	37.12	928.4654	8	0.7	465.2403	2	29.00				9.1462E6	7.7654E6	1.01E7	9.9682E6	1.0153E7				9.3889E6	9.0656E6	8.7283E6	1.8443E7	1.5591E7	1.537E7	1.0915E7	1.1327E7	1.1456E7	1.4048E6	2.0143E6	6.036E6	5.6748E6	5.4601E6	5.3634E7	5.2143E7	4.979E7	5.0333E6	5.9852E6	26	F26:9226	6401_01.raw	24	0	0	0	1
4	3	P21333|FLNA_HUMAN	V.TVLFAGQHIAK.S	Y	36.86	1183.6713	11	1.3	395.5649	3	29.66									1.5157E6	1.4065E6					7.4581E6	5.5688E6	7.1256E6												5.1954E6	5.9094E6	9	F9:9600	4312_01.raw	7	0	0	0	0
4	3	P21333|FLNA_HUMAN	K.AEGPGLSR.T	Y	36.80	785.4031	8	-0.4	393.7087	2	14.86	6.0728E6	6.4535E6	8.019E6	8.5969E6	1.0414E7	8.8296E7	5.089E7	5.3013E7	1.154E7	1.3206E7	9.0834E6	4.3953E7	3.5908E7	3.2776E7	5.7895E7	5.5097E7	5.0034E7	2.864E7	2.6023E7	3.3034E7	9.8272E6	1.3352E7	6.2448E6	7.0313E6	6.745E6	1.3073E7	1.4558E7	1.5211E7		1.8216E6	23	F23:3819	6313_01.raw	31	1	1	1	1
4	3	P21333|FLNA_HUMAN	F.VVPVASPSGDAR.R	Y	36.77	1153.6091	12	5.2	577.8148	2	19.72																			6.0842E6	5.4903E6											20	F20:5609	4484_03.raw	2	0	0	0	0
4	3	P21333|FLNA_HUMAN	R.AYGPGIEPTGNM(+15.99)VK.K	Y	36.73	1448.6969	14	1.5	725.3568	2	27.27																6.3495E6															16	F16:8648	4406_02.raw	1	0	0	0	0
4	3	P21333|FLNA_HUMAN	S.VWYVPEVTGTHK.V	Y	36.69	1414.7245	12	1.3	472.5827	3	40.97																	1.5636E6														17	F17:13987	4406_03.raw	1	0	0	0	0
4	3	P21333|FLNA_HUMAN	G.TVEPQLEAR.G	Y	36.66	1041.5454	9	0.1	521.7800	2	22.22				1.9676E7	1.9403E7			1.1927E7	2.0737E7	2.1397E7	2.3082E7				8.2426E7	7.0938E7	6.8722E7	5.1587E7	5.0912E7	5.293E7			7.8961E6		8.1076E6	1.1889E7	1.1221E7	9.188E6	4.1661E7	4.2916E7	29	F29:6561	6474_01.raw	19	0	0	0	1
4	3	P21333|FLNA_HUMAN	V.LPGDYSILVK.Y	N	36.58	1103.6226	10	3.4	552.8204	2	43.61															3.91E6	2.957E6	2.9376E6														15	F15:15064	4406_01.raw	3	0	0	0	0
4	3	P21333|FLNA_HUMAN	S.FTVDC(+57.02)SK.A	N	36.43	855.3796	7	-0.3	428.6970	2	18.16															6.9451E6	6.3923E6	6.8544E6												4.963E6	4.6919E6	29	F29:5029	6474_01.raw	5	0	0	0	0
4	3	P21333|FLNA_HUMAN	W.GGVSIPNSPFR.V	Y	36.04	1129.5880	11	0.6	565.8016	2	41.01									3.9594E6	3.5357E6	3.2356E6				1.0087E7	8.2151E6	8.2276E6		2.0041E6	1.9789E6									2.6651E6	2.1455E6	15	F15:14099	4406_01.raw	10	0	0	0	0
4	3	P21333|FLNA_HUMAN	K.YTPVQQGPVGVNVTY.G	Y	36.03	1620.8147	15	3.1	811.4172	2	43.96																		2.804E6	4.6518E6	2.7306E6											18	F18:14508	4484_01.raw	3	0	0	0	0
4	3	P21333|FLNA_HUMAN	N.LQTDLSDGLR.L	N	36.00	1116.5775	10	-3.1	559.2943	2	31.48																	1.4938E6												4.1021E5		29	F29:9972	6474_01.raw	2	0	0	0	0
4	3	P21333|FLNA_HUMAN	K.GQHVPGSPFQFT.V	N	35.99	1300.6200	12	0.4	651.3175	2	44.80						4.2024E6	3.2948E6																								7	F7:14921	3849_02.raw	2	0	0	0	0
4	3	P21333|FLNA_HUMAN	K.AEISFEDRK.D	Y	35.98	1093.5403	9	0.0	365.5207	3	21.27	1.3879E7					3.6051E6	3.4506E6	2.7699E6										4.234E6			1.0426E7	1.5088E7	1.1239E7	1.1595E7	1.0645E7	2.2126E7	1.6174E7	1.5409E7			24	F24:6178	6313_02.raw	14	1	0	0	0
4	3	P21333|FLNA_HUMAN	K.DQEFTVK.S	Y	35.91	865.4181	7	-0.2	433.7162	2	21.71	4.728E7	4.8235E7	5.4306E7	7.4933E7	8.2254E7	5.8694E7	5.466E7	5.0891E7	9.2022E7	8.9267E7	9.3754E7	3.8823E7	4.3138E7	3.5165E7	1.7806E8	1.6095E8	1.5785E8	1.6937E8	1.765E8	1.7932E8	6.3206E7	9.0896E7	5.1642E7	4.4342E7	4.4733E7	7.3559E7	7.8379E7	7.023E7	7.8475E7	8.3372E7	24	F24:6300	6313_02.raw	30	1	1	1	1
4	3	P21333|FLNA_HUMAN	K.VNQPASFAV.S	N	35.86	931.4763	9	-1.3	466.7448	2	37.07	6.642E6	5.9719E6	6.3697E6	1.7382E7	1.7296E7	3.6273E6			1.5946E7	1.6136E7	1.6215E7							2.4175E7	2.6021E7	2.3996E7	3.9591E6	4.7189E6	4.3521E6	4.169E6		1.0226E7	1.0104E7	1.0428E7	6.5127E6		5	F5:12363	3484_03_r.raw	20	1	1	1	1
4	3	P21333|FLNA_HUMAN	K.VTVLFAGQHIAK(+114.04).S	Y	35.72	1396.7826	12	1.1	466.6020	3	34.17	3.6229E6	3.5677E6	3.2423E6																				6.1701E6	5.647E6	5.6679E6						23	F23:10953	6313_01.raw	6	1	1	1	0
4	3	P21333|FLNA_HUMAN	R.AGGPGLER.A	N	35.59	755.3926	8	-2.7	378.7025	2	15.27						5.6009E6						3.4369E6	2.5286E6	2.1347E6																	12	F12:3919	4371_01.raw	4	0	0	0	0
4	3	P21333|FLNA_HUMAN	A.GEGGLSLAIEGPSK.A	Y	35.52	1313.6826	14	1.9	657.8499	2	38.92															1.9947E6															3.2982E6	30	F30:12697	6474_02.raw	2	0	0	0	0
4	3	P21333|FLNA_HUMAN	L.YGDEEVPR.S	Y	35.38	963.4297	8	-0.2	482.7220	2	19.34						8.1896E6	8.4676E6	7.9573E6							2.19E7	2.1444E7	2.1644E7												6.7947E6	6.6422E6	7	F7:5591	3849_02.raw	8	0	0	0	0
4	3	P21333|FLNA_HUMAN	S.SVFVDSLTK.A	Y	35.26	994.5335	9	1.7	498.2749	2	37.28									3.353E6		2.5978E6				1.0844E7	8.3616E6	9.6264E6	1.6902E6		2.5747E6									2.1985E6		16	F16:12613	4406_02.raw	8	0	0	0	0
4	3	P21333|FLNA_HUMAN	P.GLGADNSVVR.F	Y	35.22	986.5145	10	-0.5	494.2643	2	20.97															0	0	0												1.9842E7	2.2098E7	29	F29:6018	6474_01.raw	2	0	0	0	0
4	3	P21333|FLNA_HUMAN	V.VPVASPSGDAR.R	Y	35.07	1054.5406	11	4.0	528.2797	2	16.91															0	0	0														15	F15:4618	4406_01.raw	0	0	0	0	0
4	3	P21333|FLNA_HUMAN	K.VN(+.98)QPASFAVSLNGAK.G	Y	34.77	1502.7728	15	6.6	752.3986	2	38.53					2.9146E6																										5	F5:12917	3484_03_r.raw	1	0	0	0	0
4	3	P21333|FLNA_HUMAN	R.LLGWIQNKLPQLPITNFSR.D	Y	34.63	2237.2683	19	-0.2	746.7632	3	66.22																										3.7936E5		1.3642E6			26	F26:22073	6401_01.raw	2	0	0	0	0
4	3	P21333|FLNA_HUMAN	G.GEHVPNSPFQVT(+203.08)ALAGDQPSVQPPLR.S	Y	34.49	2943.4727	26	0.2	982.1650	3	54.70												0														0					12	F12:18066	4371_01.raw	0	0	0	0	0
4	3	P21333|FLNA_HUMAN	G.PGLQGGSAGSPAR.F	Y	34.43	1153.5840	13	3.0	577.8010	2	28.02																		1.4742E6													18	F18:8735	4484_01.raw	1	0	0	0	0
4	3	P21333|FLNA_HUMAN	L.SPFM(+15.99)ADIR.D	Y	34.42	951.4484	8	-2.0	476.7305	2	29.16					2.9357E6													7.1607E6	7.8818E6	7.9567E6										2.1889E6	18	F18:9148	4484_01.raw	5	0	0	0	0
4	3	P21333|FLNA_HUMAN	K.LPQLPITN(+.98)F.S	Y	34.10	1042.5698	9	-2.0	522.2911	2	62.71		0																													2	F2:21021	3399_02.raw	0	0	0	0	0
4	3	P21333|FLNA_HUMAN	K.AHEPTYFTV.D	Y	34.04	1063.4974	9	0.9	532.7565	2	40.36					1.9644E6	8.2374E6	7.3576E6	7.2092E6	4.0658E6	3.7414E6	5.6239E6				1.4008E7	1.2019E7	9.5556E6	4.8075E6	5.4373E6	5.0639E6											7	F7:13361	3849_02.raw	13	0	0	0	0
4	3	P21333|FLNA_HUMAN	R.LYSVSYLLK.D	Y	33.97	1084.6168	9	1.8	543.3167	2	48.62			2.2461E6		2.5683E6				4.1852E6		4.7824E6												9.7443E5								5	F5:16304	3484_03_r.raw	5	0	0	1	0
4	3	P21333|FLNA_HUMAN	K.TGVAVNKPAEFTVDA.K	Y	33.86	1517.7726	15	3.0	759.8959	2	37.08									4.3799E6	4.281E6	4.2722E6						3.958E6														11	F11:12502	4312_03.raw	4	0	0	0	0
4	3	P21333|FLNA_HUMAN	V.TITWGGQNIGR.S	Y	33.71	1201.6204	11	0.3	601.8176	2	36.12						4.412E6																									6	F6:11957	3849_01.raw	1	0	0	0	0
4	3	P21333|FLNA_HUMAN	R.LIALLEVLSQKK.M	Y	33.67	1353.8595	12	3.4	452.2953	3	60.33																		7.7943E5	4.904E5		3.0603E5						5.3994E5				18	F18:19995	4484_01.raw	4	0	0	0	0
4	3	P21333|FLNA_HUMAN	F.KVPVHDVTDASK.V	Y	33.49	1294.6881	12	1.5	432.5706	3	15.06																			1.4393E6												19	F19:3880	4484_02.raw	1	0	0	0	0
4	3	P21333|FLNA_HUMAN	T.YGGHQVPGSPFK.V	Y	33.41	1272.6251	12	-4.2	637.3171	2	26.73															2.3919E6		2.5229E6														17	F17:8478	4406_03.raw	2	0	0	0	0
4	3	P21333|FLNA_HUMAN	A.GDQPSVQPPLR.S	Y	33.37	1192.6200	11	-0.2	597.3171	2	27.26															4.3211E6	4.0458E6	4.4355E6														15	F15:8729	4406_01.raw	3	0	0	0	0
4	3	P21333|FLNA_HUMAN	I.QSGTTNKPNK.F	Y	33.35	1073.5465	10	2.4	537.7818	2	14.47															3.8521E6																15	F15:3626	4406_01.raw	1	0	0	0	0
4	3	P21333|FLNA_HUMAN	K.RAEFTVETR.S	Y	33.22	1107.5673	9	-0.5	554.7906	2	20.89						2.6788E6	2.7936E6											3.9346E6	0				2.4837E6			4.2394E6	5.2415E6	4.4706E6			18	F18:6040	4484_01.raw	7	0	0	0	0
4	3	P21333|FLNA_HUMAN	L.LGWIQNK.L	N	33.19	857.4760	7	-0.5	429.7451	2	32.20				1.0766E7	1.0749E7	4.2916E6	3.7158E6	3.764E6	7.3699E6	7.9827E6	8.1144E6				1.6717E7	1.4332E7	1.5431E7	7.6721E6	8.0474E6	8.3115E6			5.0408E6	5.184E6		2.4724E6	2.6597E6		4.6765E6	4.3121E6	17	F17:10644	4406_03.raw	20	0	0	0	1
4	3	P21333|FLNA_HUMAN	A.EFSIWTR.E	N	33.16	937.4658	7	-0.7	469.7398	2	45.41						1.6947E6	1.4514E6	1.3313E6							4.9755E6	4.7092E6	4.416E6												1.6635E6	1.9401E6	17	F17:15525	4406_03.raw	8	0	0	0	0
4	3	P21333|FLNA_HUMAN	A.GVAPLQVK.V	Y	33.15	810.4963	8	-0.3	406.2553	2	24.20				2.1214E7	2.3979E7	3.6267E6	3.3699E6	3.2309E6	1.2399E7	1.2795E7	1.2803E7				6.3357E7	5.4212E7	5.2938E7	4.7408E7	5.0735E7	4.8831E7			1.5758E7	1.4609E7	1.3952E7	9.8099E6	1.0799E7	1.0296E7	2.7141E7	2.9287E7	5	F5:7492	3484_03_r.raw	22	0	0	0	1
4	3	P21333|FLNA_HUMAN	Q.SFQVDTSK.A	Y	33.12	910.4396	8	0.6	456.2274	2	20.05				1.0492E7	1.1543E7					2.0059E7	1.9718E7	7.207E6	5.9387E6	5.4638E6	4.7719E7	4.4871E7	4.4592E7	2.3448E7	2.2041E7	2.2052E7			5.3881E6	5.7052E6	5.5165E6	7.1999E6	9.0943E6	7.7358E6	1.5079E7	1.4617E7	16	F16:5844	4406_02.raw	21	0	0	0	1
4	3	P21333|FLNA_HUMAN	R.TGVELGKPTHFTVN.A	Y	33.04	1498.7780	14	1.9	500.6009	3	32.89										5.028E6	4.357E6						1.5685E6														11	F11:10926	4312_03.raw	3	0	0	0	0
4	3	P21333|FLNA_HUMAN	T.GVELGKPTHFTVNAK.A	Y	32.99	1596.8623	15	2.0	533.2958	3	29.42																				2.8255E6											20	F20:9349	4484_03.raw	1	0	0	0	0
4	3	P21333|FLNA_HUMAN	L.AEDAPWK.K	N	32.92	815.3813	7	-1.8	408.6972	2	22.00															5.171E7	4.2322E7		1.0611E7		1.0526E7						5.2622E6			3.591E7	3.5378E7	29	F29:6428	6474_01.raw	7	0	0	0	0
4	3	P21333|FLNA_HUMAN	K.YNEQHVPGSPFTA.R	Y	32.84	1445.6575	13	1.9	723.8374	2	34.73																		5.4522E6	4.6478E6	4.1787E6											18	F18:11252	4484_01.raw	3	0	0	0	0
4	3	P21333|FLNA_HUMAN	L.TVSSLQESGLK.V	Y	32.79	1147.6084	11	0.3	574.8116	2	24.23																			2.7756E6	2.3787E6											19	F19:7348	4484_02.raw	2	0	0	0	0
4	3	P21333|FLNA_HUMAN	K.LVSIDSK.A	N	32.64	760.4330	7	2.5	381.2247	2	20.93			2.3167E7	2.9277E7											4.4391E7						2.9142E7										15	F15:6222	4406_01.raw	4	0	0	1	1
4	3	P21333|FLNA_HUMAN	A.EFTVETR.S	Y	32.59	880.4290	7	2.0	441.2227	2	23.63				1.6013E7	1.703E7		9.1064E6		1.4929E7	1.5608E7	1.6527E7				1.2209E8	1.0194E8	9.7718E7	4.6113E7	4.4372E7	4.557E7			6.2266E6	0	5.5318E6				5.0961E7	5.3123E7	16	F16:7165	4406_02.raw	16	0	0	0	1
4	3	P21333|FLNA_HUMAN	K.NGQHVASSPIPV.V	Y	32.53	1204.6200	12	1.4	603.3181	2	31.27																			1.5988E7										4.8452E6	4.4791E6	29	F29:9899	6474_01.raw	3	0	0	0	0
4	3	P21333|FLNA_HUMAN	A.YGPGIEPTGNM(+15.99)VK.K	Y	32.46	1377.6598	13	0.3	689.8374	2	25.55																			4.4049E6												19	F19:7852	4484_02.raw	1	0	0	0	0
4	3	P21333|FLNA_HUMAN	A.EISFEDR.K	Y	32.40	894.4083	7	1.0	448.2119	2	26.96				2.8076E7	2.8083E7	8.6524E6	7.6989E6	8.0825E6	2.4385E7	2.5539E7	2.6151E7	2.3076E6	2.1932E6	2.5232E6	1.2799E8	1.2547E8	1.2478E8	6.5459E7	6.783E7	6.7208E7			6.9592E6	6.6519E6	6.2982E6	1.0418E7	9.8697E6	1.0034E7	3.0845E7	3.4782E7	16	F16:8552	4406_02.raw	25	0	0	0	1
4	3	P21333|FLNA_HUMAN	T.TEFSVDAR.A	Y	32.10	923.4348	8	-0.6	462.7244	2	24.06															1.1813E7														1.6084E7	1.4991E7	29	F29:7225	6474_01.raw	3	0	0	0	0
4	3	P21333|FLNA_HUMAN	K.VEYTPYEEGLHSVDVTY.D	Y	32.04	1999.9050	17	0.2	1000.9600	2	48.03															3.8437E6	4.3234E6	4.096E6		3.4956E6	4.0542E6											19	F19:15963	4484_02.raw	5	0	0	0	0
4	3	P21333|FLNA_HUMAN	R.VHGPGIQSGTTN(+.98)KPNK.F	Y	32.01	1634.8376	16	3.2	409.7180	4	14.45				5.0272E5																											4	F4:3748	3484_02.raw	1	0	0	0	1
4	3	P21333|FLNA_HUMAN	R.DAPQDFHPDRV.K	Y	31.95	1295.5894	11	3.2	432.8718	3	26.69						5.884E6	5.1873E6	5.0458E6																							8	F8:8339	3849_03.raw	3	0	0	0	0
4	3	P21333|FLNA_HUMAN	T.AQGPGLEPSGNIANK.T	Y	31.76	1451.7368	15	2.8	726.8777	2	25.40															2.1769E6		2.267E6												1.1594E6		15	F15:8142	4406_01.raw	3	0	0	0	0
4	3	P21333|FLNA_HUMAN	R.SAGQGEVLVYVEDPAGHQEEAK(+114.04).V	Y	31.52	2426.1350	22	5.3	809.7233	3	38.11	1.364E6																	2.8059E6													18	F18:12494	4484_01.raw	2	1	0	0	0
4	3	P21333|FLNA_HUMAN	K.AHVVP(+15.99)C(+57.02)FDASK.V	Y	31.43	1245.5812	11	0.6	416.2012	3	24.53	1.3963E6																									0	2.7944E6				27	F27:7607	6401_02.raw	2	1	0	0	0
4	3	P21333|FLNA_HUMAN	F.GGEHVPNSPFQVT(+203.08)ALAGDQPSVQPPLR.S	Y	31.38	3000.4941	27	0.9	1001.1729	3	53.14	0																	0			0	0									18	F18:17619	4484_01.raw	0	0	0	0	0
4	3	P21333|FLNA_HUMAN	L.SVTIDGPSK.V	N	31.18	902.4709	9	1.1	452.2432	2	18.87									4.9268E6	5.761E6						1.4071E7	1.3515E7														16	F16:5360	4406_02.raw	4	0	0	0	0
4	3	P21333|FLNA_HUMAN	R.EEGPYEVEVTY.D	Y	31.16	1313.5663	11	1.0	657.7911	2	44.55						4.9229E6	3.0993E6	3.3672E6																							7	F7:14768	3849_02.raw	3	0	0	0	0
4	3	P21333|FLNA_HUMAN	L.SLAIEGPSK.A	Y	31.03	900.4916	9	0.9	451.2535	2	24.09															3.4805E7	3.2666E7	3.4691E7	1.6438E7	1.6524E7	1.547E7			5.3808E6	3.1121E6						7.9335E6	16	F16:7432	4406_02.raw	9	0	0	0	0
4	3	P21333|FLNA_HUMAN	A.LLEVLSQK.K	N	30.96	928.5593	8	3.4	465.2885	2	35.45															8.913E6														5.3028E6	5.8772E6	30	F30:11434	6474_02.raw	3	0	0	0	0
4	3	P21333|FLNA_HUMAN	V.NKPAEFTVDAK.H	Y	30.70	1218.6244	11	2.6	610.3210	2	21.65															0	0	0														16	F16:6460	4406_02.raw	0	0	0	0	0
4	3	P21333|FLNA_HUMAN	V.ALEFLDR.E	N	30.69	862.4548	7	0.8	432.2350	2	39.63					1.4789E6	3.0745E6	2.6891E6	2.5786E6	1.2042E7	1.279E7	1.271E7				4.4867E7	3.5478E7	3.4938E7	3.9233E6	3.1115E6	3.8353E6									3.3981E6	4.0762E6	20	F20:13065	4484_03.raw	15	0	0	0	0
4	3	P21333|FLNA_HUMAN	R.TGVELGKPTHF.T	Y	30.39	1184.6189	11	-0.1	395.8802	3	31.05				2.8607E6				1.3439E6	3.5025E6	3.8387E6	3.2162E6				0		6.4995E6		5.0729E6	4.0806E6								3.153E6	3.1236E6	3.4947E6	17	F17:10250	4406_03.raw	11	0	0	0	1
4	3	P21333|FLNA_HUMAN	Y.GDEEVPR.S	Y	30.39	800.3664	7	-2.2	401.1896	2	14.81						1.3276E7	1.406E7	1.2461E7							1.5978E7	1.2488E7	1.3235E7														7	F7:3785	3849_02.raw	6	0	0	0	0
4	3	P21333|FLNA_HUMAN	L.K(+114.04)PGAPLRPK.L	Y	30.39	1076.6454	9	0.1	359.8891	3	14.97																									7.0274E5						25	F25:3838	6313_03.raw	1	0	0	0	0
4	3	P21333|FLNA_HUMAN	T.VEPQLEAR.G	Y	30.24	940.4977	8	0.2	471.2563	2	19.88				6.3726E6	5.6589E6				4.2394E6						1.897E7	1.8255E7	1.7463E7	1.8646E7	1.7558E7	1.7552E7									1.7547E7	1.675E7	20	F20:5694	4484_03.raw	11	0	0	0	1
4	3	P21333|FLNA_HUMAN	A.SFAVSLN(+.98)GAK.G	Y	30.24	993.5131	10	-2.2	497.7627	2	33.82					3.7403E7						3.8967E7											1.1658E6				0					26	F26:10986	6401_01.raw	3	0	0	0	0
4	3	P21333|FLNA_HUMAN	P.AEFSIWTR.E	N	30.20	1008.5029	8	-0.6	505.2584	2	44.87																													1.8537E6	1.3786E6	29	F29:14709	6474_01.raw	2	0	0	0	0
4	3	P21333|FLNA_HUMAN	V.GPLGEGGAHK.V	N	29.92	921.4668	10	1.6	461.7414	2	16.72																	6.043E6														17	F17:4476	4406_03.raw	1	0	0	0	0
4	3	P21333|FLNA_HUMAN	P.VHDVTDASK.V	Y	29.73	970.4719	9	6.0	486.2462	2	16.29																0													0		16	F16:4285	4406_02.raw	0	0	0	0	0
4	3	P21333|FLNA_HUMAN	A.VSPSLDLSK.I	Y	29.59	944.5178	9	2.1	473.2672	2	28.14				5.8777E6	5.536E6	1.0577E7	9.1622E6	6.2337E6	1.5894E7	1.3467E7	1.5581E7			3.2102E6	4.4753E7	3.8429E7	3.8596E7	8.3658E6	9.9369E6	8.3178E6					2.349E6	5.929E6	5.6561E6	5.4539E6	8.0281E6		11	F11:9137	4312_03.raw	20	0	0	0	1
4	3	P21333|FLNA_HUMAN	E.C(+57.02)YVTEIDQDK.Y	Y	29.55	1269.5547	10	1.5	635.7856	2	27.27															1.8528E6	1.975E6															15	F15:8896	4406_01.raw	2	0	0	0	0
4	3	P21333|FLNA_HUMAN	L.AIAVEGPSK.A	Y	29.53	870.4810	9	0.3	436.2479	2	18.72															0	0	9.6403E6			0											16	F16:5278	4406_02.raw	1	0	0	0	0
4	3	P21333|FLNA_HUMAN	K.SADFVVEAIGDDVGTL.G	Y	29.49	1606.7726	16	6.5	804.3988	2	67.10										8.2018E5																					10	F10:22540	4312_02.raw	1	0	0	0	0
4	3	P21333|FLNA_HUMAN	G.HQVPGSPFK.V	Y	29.46	995.5188	9	0.5	498.7669	2	30.28															3.8472E6	3.7094E6															16	F16:9888	4406_02.raw	2	0	0	0	0
4	3	P21333|FLNA_HUMAN	R.TGVELGKPT.H	Y	29.40	900.4916	9	0.7	451.2534	2	22.37															7.843E7	7.6048E7	6.9109E7														17	F17:6771	4406_03.raw	3	0	0	0	0
4	3	P21333|FLNA_HUMAN	V.VDNADGTQTVNYVPSR.E	Y	29.37	1734.8173	16	2.2	868.4178	2	26.13																		1.4511E6													18	F18:8084	4484_01.raw	1	0	0	0	0
4	3	P21333|FLNA_HUMAN	Y.VPDVTGR.Y	Y	29.25	742.3973	7	-1.3	372.2054	2	17.30															5.5917E7	5.2414E7	5.0414E7														16	F16:4776	4406_02.raw	3	0	0	0	0
4	3	P21333|FLNA_HUMAN	S.FQVDTSK.A	Y	29.16	823.4076	7	-2.3	412.7101	2	18.72															7.5372E6																15	F15:5364	4406_01.raw	1	0	0	0	0
4	3	P21333|FLNA_HUMAN	R.SPYTVTVGQAC(+57.02)N(+.98)PSAC(+57.02)R.A	Y	29.11	1867.8192	17	9.1	623.6193	3	29.34					1.0019E6																										5	F5:9501	3484_03_r.raw	1	0	0	0	0
4	3	P21333|FLNA_HUMAN	S.IPNSPFR.V	Y	29.09	829.4446	7	-0.9	415.7292	2	29.24															2.2307E7	1.9877E7	1.916E7														17	F17:9548	4406_03.raw	3	0	0	0	0
4	3	P21333|FLNA_HUMAN	N.LTETYVQDR.G	Y	28.92	1123.5509	9	1.4	562.7835	2	22.17																	2.3094E6														17	F17:6744	4406_03.raw	1	0	0	0	0
4	3	P21333|FLNA_HUMAN	R.DVDIIDHHDNTYTV.K	Y	28.88	1655.7427	14	-0.7	828.8781	2	38.95								1.7154E6																							8	F8:12729	3849_03.raw	1	0	0	0	0
4	3	P21333|FLNA_HUMAN	R.VHGPGIQSGTTNKPN(+.98)K.F	Y	28.83	1634.8376	16	2.4	409.7177	4	14.55									9.5146E5																						9	F9:3735	4312_01.raw	1	0	0	0	0
4	3	P21333|FLNA_HUMAN	R.TGVELGKPTHFTVNAK(+114.04).A	Y	28.49	1811.9529	16	1.3	453.9961	4	30.18													9.1878E6										1.7814E7								13	F13:9433	4371_02.raw	2	0	0	0	0
4	3	P21333|FLNA_HUMAN	K.DGTVTVR.Y	N	28.36	746.3923	7	-0.9	374.2031	2	14.54										1.6153E5	1.2496E5																				10	F10:3689	4312_02.raw	2	0	0	0	0
4	3	P21333|FLNA_HUMAN	V.SPSLDLSK.I	Y	28.24	845.4494	8	-0.4	423.7318	2	25.63							3.6427E6								3.5312E7	3.4456E7	3.0245E7														17	F17:8119	4406_03.raw	4	0	0	0	0
4	3	P21333|FLNA_HUMAN	V.EFTIDAK.D	Y	28.22	822.4123	7	-1.0	412.2130	2	27.79			2.5371E6			8.5556E6			2.0178E7	2.2483E7	2.1997E7				5.314E7	4.5274E7	4.9624E7			1.5022E7											6	F6:8948	3849_01.raw	9	0	0	1	0
4	3	P21333|FLNA_HUMAN	D.GVPVP(+15.99)GS(+365.13)PFPLEAVAPTKPSK.V	Y	27.87	2455.2732	21	-4.5	819.4280	3	54.09							0																								7	F7:17929	3849_02.raw	0	0	0	0	0
4	3	P21333|FLNA_HUMAN	R.VSGQGLHEGHTFEPAEFIIDTR.D	Y	27.74	2439.1819	22	0.5	610.8030	4	47.53				0																											4	F4:15983	3484_02.raw	0	0	0	0	0
4	3	P21333|FLNA_HUMAN	S.PFS(+203.08)VAVSPSLDLSK.I	Y	27.45	1648.8560	14	-9.0	825.4278	2	58.94	0																														1	F1:19853	3399_01.raw	0	0	0	0	0
4	3	P21333|FLNA_HUMAN	C.SVEYIPYEAGTYSLNVTYGGHQVPGSPFK.V	Y	27.30	3159.5188	29	-0.6	1054.1796	3	54.96																										0					26	F26:18304	6401_01.raw	0	0	0	0	0
4	3	P21333|FLNA_HUMAN	R.TGVELGK.P	Y	27.12	702.3912	7	-1.7	352.2023	2	17.23												0			5.1923E7	4.3979E7															15	F15:5140	4406_01.raw	2	0	0	0	0
4	3	P21333|FLNA_HUMAN	V.QITDPEGKPK.K	Y	27.07	1111.5873	10	2.6	371.5373	3	14.54															0		0														15	F15:3661	4406_01.raw	0	0	0	0	0
4	3	P21333|FLNA_HUMAN	V.SWGGVSIPNSPFR.V	Y	27.02	1402.6993	13	0.3	702.3572	2	52.86															6.6318E6	6.3153E6															16	F16:18045	4406_02.raw	2	0	0	0	0
4	3	P21333|FLNA_HUMAN	E.ADIDFDIIR.N	Y	26.87	1076.5502	9	-3.7	539.2804	2	49.80										8.1078E5																					10	F10:16821	4312_02.raw	1	0	0	0	0
4	3	P21333|FLNA_HUMAN	K.DAGEGLLAV.Q	N	26.67	843.4338	9	0.0	422.7242	2	49.59					1.1531E6	2.6403E6																									6	F6:16562	3849_01.raw	2	0	0	0	0
4	3	P21333|FLNA_HUMAN	A.IAVEGPSK.A	N	26.54	799.4439	8	-0.3	400.7291	2	16.99															9.4521E6			3.4989E6		3.3809E6											20	F20:4605	4484_03.raw	3	0	0	0	0
4	3	P21333|FLNA_HUMAN	K.VGSAADIPINISETDLSLL.T	Y	26.43	1927.0149	19	3.6	964.5182	2	71.83										5.3916E5	1.2599E6																				10	F10:24199	4312_02.raw	2	0	0	0	0
4	3	P21333|FLNA_HUMAN	R.AEAGVPAEFSIW.T	Y	26.41	1275.6135	12	0.7	638.8145	2	64.33									1.9276E6	1.5769E6	1.635E6																				9	F9:21676	4312_01.raw	3	0	0	0	0
4	3	P21333|FLNA_HUMAN	V.PVPGSPFPLEAVAPTKPSK.V	Y	26.36	1918.0563	19	-8.8	960.0270	2	60.12	0																														1	F1:20246	3399_01.raw	0	0	0	0	0
4	3	P21333|FLNA_HUMAN	A.TVVPPSGR.E	Y	26.22	811.4552	8	-1.5	406.7343	2	15.74															5.2237E7	4.8892E7															15	F15:4089	4406_01.raw	2	0	0	0	0
4	3	P21333|FLNA_HUMAN	R.FGGEHVPNSPFQVTALAGDQPSVQPPL.R	Y	26.14	2788.3821	27	3.5	930.4712	3	60.13																														1.2143E6	30	F30:19895	6474_02.raw	1	0	0	0	0
4	3	P21333|FLNA_HUMAN	L.IALLEVLSQK.K	N	26.13	1112.6804	10	-0.4	557.3473	2	55.85				4.7181E5																											4	F4:18781	3484_02.raw	1	0	0	0	1
4	3	P21333|FLNA_HUMAN	V.SIPNSPFR.V	Y	26.08	916.4766	8	0.4	459.2458	2	31.54						5.4991E6																									6	F6:10256	3849_01.raw	1	0	0	0	0
4	3	P21333|FLNA_HUMAN	N.KPAEFTVDAK.H	Y	26.08	1104.5814	10	1.7	369.2017	3	21.04															7.5769E6																15	F15:6291	4406_01.raw	1	0	0	0	0
4	3	P21333|FLNA_HUMAN	R.DVDIIDHHDNTYTVK(+114.04).Y	Y	25.93	1897.8806	15	0.8	633.6346	3	29.05										1.2052E7									1.3356E7												10	F10:9384	4312_02.raw	2	0	0	0	0
4	3	P21333|FLNA_HUMAN	K.VGSAADIPI.N	Y	25.58	841.4545	9	0.0	421.7345	2	42.43						1.3573E7																									6	F6:14118	3849_01.raw	1	0	0	0	0
4	3	P21333|FLNA_HUMAN	A.TFTVNTK.D	Y	25.54	809.4283	7	0.3	405.7216	2	20.29															2.8968E7		2.7529E7														17	F17:5981	4406_03.raw	2	0	0	0	0
4	3	P21333|FLNA_HUMAN	G.HVGISFVPK.E	Y	25.30	982.5599	9	2.2	492.2883	2	31.31																													2.1444E6		29	F29:9945	6474_01.raw	1	0	0	0	0
4	3	P21333|FLNA_HUMAN	Y.APSEAGLHEM(+15.99)DIR.Y	Y	25.27	1440.6667	13	-1.0	481.2291	3	21.64																1.3649E6	1.4057E7														17	F17:6445	4406_03.raw	2	0	0	0	0
4	3	P21333|FLNA_HUMAN	K.GLVEPVDV.V	Y	25.10	826.4436	8	0.0	414.2291	2	43.20															2.4908E6																15	F15:14927	4406_01.raw	1	0	0	0	0
4	3	P21333|FLNA_HUMAN	S.VALEFLDR.E	N	24.96	961.5233	8	0.5	481.7691	2	45.12										4.719E5						8.2478E5															10	F10:15287	4312_02.raw	2	0	0	0	0
4	3	P21333|FLNA_HUMAN	R.VNVGAGSHPNK.V	Y	24.94	1078.5519	11	-0.6	360.5244	3	13.11																						1.7466E5					4.2422E5				27	F27:3229	6401_02.raw	2	0	0	0	0
4	3	P21333|FLNA_HUMAN	C.YVTEIDQDK.Y	Y	24.83	1109.5240	9	-0.7	555.7689	2	21.55																	5.0622E5														17	F17:6411	4406_03.raw	1	0	0	0	0
2	1	P08123|CO1A2_HUMAN	R.GSDGSVGPVGPAGPIGSAGPP(+15.99)GFP(+15.99)GAP(+15.99)GPK.G	Y	114.13	2588.2505	30	1.4	863.7587	3	41.64	1.5299E8	1.379E8	1.4916E8	1.0675E8	1.1848E8	1.1217E8	1.0376E8	1.0753E8	1.2508E8	1.2007E8	1.2533E8	3.0193E7	2.9462E7	2.5757E7	1.3928E7	1.2978E7		2.7091E7	2.4002E7	2.6014E7	1.4356E8	1.8577E8	2.3212E7	2.1606E7	2.0883E7	8.4382E7	9.4085E7	8.8285E7			9	F9:14101	4312_01.raw	51	2	2	2	2
2	1	P08123|CO1A2_HUMAN	K.GPSGEAGTAGPP(+15.99)GTP(+15.99)GPQGLLGAP(+15.99)GILGLP(+15.99)GSR.G	Y	110.06	2956.4888	33	2.1	1479.2548	2	54.32	8.8424E8	8.2453E8	7.638E8	5.5185E8	6.0159E8	3.4823E8	2.8632E8	2.8866E8	5.1298E8	4.8906E8	5.1559E8	4.5985E7	4.9793E7	4.297E7	2.1205E7	1.906E7	1.7058E7	5.9124E7	4.9197E7	5.2888E7	6.9225E8	8.8762E8	4.4382E7	4.3906E7	4.4788E7	3.3811E8	3.4167E8	3.2379E8	1.1341E7	1.2931E7	9	F9:18341	4312_01.raw	74	3	3	3	3
2	1	P08123|CO1A2_HUMAN	R.GSDGSVGPVGPAGPIGSAGPP(+15.99)GFPGAP(+15.99)GPK.G	Y	106.54	2572.2556	30	1.7	1287.1372	2	45.05	6.5273E7	5.2387E7	5.5526E7	3.8755E7	3.8838E7	4.7999E7	4.2889E7	4.0877E7	5.1209E7	4.5057E7	5.3824E7	6.8132E6	1.1382E7	4.3122E6				7.7388E6	7.7795E6	8.1392E6	6.0795E7	7.3624E7	4.9739E6	3.9341E6	4.7917E6	4.0782E7	4.0138E7	4.0533E7			7	F7:14879	3849_02.raw	42	2	2	2	2
2	1	P08123|CO1A2_HUMAN	R.GPP(+15.99)GAAGAP(+15.99)GPQGFQGPAGEP(+15.99)GEP(+15.99)GQTGPAGAR.G	Y	103.29	2958.3491	33	1.4	1480.1838	2	29.01	4.0429E8	5.6822E7	6.2201E7	2.5275E8	4.4349E7	2.9372E8	2.6132E8	2.4191E8	1.9536E7	2.7492E8	2.8692E8	4.8719E7	4.562E7	2.8937E6		2.8325E7		4.5741E7	5.4526E7	4.353E6	3.4329E8	3.9254E8				2.3212E8	2.4778E8	1.434E7		7.9204E6	7	F7:9265	3849_02.raw	49	3	2	2	2
2	1	P08123|CO1A2_HUMAN	R.GP(+15.99)PGAAGAP(+15.99)GPQGFQGPAGEP(+15.99)GEP(+15.99)GQTGPAGAR.G	Y	103.11	2958.3491	33	1.3	1480.1837	2	27.64	3.7509E8	3.7048E8	3.5723E8	2.6005E8	2.2204E8	2.7336E8	2.4042E8	2.0765E8	2.4474E8	2.3673E8	2.4689E8	4.8719E7	4.2624E7	3.7516E7	3.2533E7	2.8325E7	2.9098E7	4.2533E7	5.0829E7	4.8041E7	3.5116E8	3.6976E8	4.2037E7	4.0185E7	4.0436E7	1.9928E8	2.3417E8	2.2378E8	7.6941E6	7.9204E6	2	F2:8841	3399_02.raw	39	2	2	1	2
2	1	P08123|CO1A2_HUMAN	R.GSDGSVGPVGPAGPIGSAGPP(+15.99)GFP(+15.99)GAP(+15.99)GP(+15.99)K.G	Y	102.85	2604.2454	30	1.4	1303.1318	2	41.21	1.0418E8	1.0268E8	1.0105E8	2.8591E7	3.472E7	4.1309E7	4.4865E7	4.7987E7	4.6546E7	4.5295E7	3.1812E7		0			2.9245E6		0		0	4.6521E7	7.3356E7				2.8689E7	2.2679E7	2.9787E7			2	F2:13756	3399_02.raw	31	2	2	2	2
2	1	P08123|CO1A2_HUMAN	K.GEQGPP(+15.99)GPP(+15.99)GFQGLP(+15.99)GPSGPAGEVGKP(+15.99)GER.G	Y	102.55	2873.3579	30	0.7	958.7939	3	34.82	4.1911E8	4.0267E8	4.1447E8	5.6235E8	5.4506E8	5.4846E8	5.4335E8	5.3802E8							2.0507E7	1.8214E7	1.964E7	1.1334E8	1.1191E8	1.1745E8	6.351E8	8.3469E8				4.0098E8	4.347E8	4.1953E8	2.3521E7	2.3549E7	2	F2:11544	3399_02.raw	39	2	2	2	3
2	1	P08123|CO1A2_HUMAN	K.GHNGLQGLP(+15.99)GIAGHHGDQGAP(+15.99)GSVGPAGPR.G	Y	101.74	2799.3547	30	2.8	700.8479	4	30.22	4.8563E7	4.6284E7	4.9696E7	1.0516E8	1.0147E8	4.6814E7	4.7975E7	4.7967E7	4.2066E7	7.2539E7	6.9888E7	2.6648E6	2.8312E6	2.7857E6				7.2401E6	6.4841E6	7.2648E6	4.2578E7	5.9568E7				5.3392E7	5.0012E7	5.0071E7			7	F7:9694	3849_02.raw	40	2	2	2	3
2	1	P08123|CO1A2_HUMAN	K.GENGVVGPTGPVGAAGPAGPNGPP(+15.99)GPAGSR.G	Y	101.74	2566.2522	30	1.7	1284.1355	2	33.21	3.9079E8	3.5335E8	3.9324E8	2.8286E8	2.8585E8	2.263E8	1.9796E8	2.0064E8	3.7324E8	2.352E8	2.5489E8	3.9174E7	3.7158E7	3.0447E7	0	3.8739E6	1.5671E7	4.4773E7	4.6004E7	4.4278E7	2.4928E8	3.4082E8	3.6195E7	3.2398E7	3.0045E7	2.0843E8	3.1512E8	1.959E8			7	F7:10815	3849_02.raw	55	2	2	3	2
2	1	P08123|CO1A2_HUMAN	R.TGEVGAVGP(+15.99)PGFAGEKGP(+15.99)SGEAGTAGP(+15.99)PGTP(+15.99)GPQGLLGAP(+15.99)GILGLP(+15.99)GSR.G	Y	96.14	4442.1987	49	-1.1	1481.7385	3	55.08			2.6091E6	7.8624E7		3.4911E7	6.9844E6	3.3158E7	5.03E7	0	8.3054E6									0	1.2584E7									0	20	F20:18332	4484_03.raw	9	0	0	1	1
2	1	P08123|CO1A2_HUMAN	R.GAP(+15.99)GAVGAP(+15.99)GPAGATGDRGEAGAAGPAGPAGPR.G	Y	94.72	2726.3120	33	2.1	682.5867	4	22.19	9.0854E8	8.5356E8	9.473E8	3.4284E8	3.4569E8	4.5121E7	4.0799E8	3.9678E8	3.667E8	3.7842E8	3.757E8	7.9637E7	8.5865E7	6.9955E7	4.3715E7	3.5122E7	3.3675E7	5.7039E6	9.2594E7	9.0841E7	6.4279E8	8.5401E8	1.0854E8	1.0755E8	1.0199E8	3.9299E8	3.6716E8	3.5309E8			2	F2:6798	3399_02.raw	59	3	3	3	2
2	1	P08123|CO1A2_HUMAN	R.GPSGPP(+15.99)GP(+15.99)DGNKGEP(+15.99)GVVGAVGTAGPSGPSGLP(+15.99)GER.G	Y	94.53	3228.5281	36	2.5	1077.1860	3	33.55	6.8259E7	7.5154E7	8.5576E7	1.3746E7	1.8053E7	8.2765E6	1.7952E7	5.442E6	7.2926E6	8.8254E6											2.6437E7	9.558E7				1.4819E7	1.4967E7				7	F7:10904	3849_02.raw	18	2	2	2	1
2	1	P08123|CO1A2_HUMAN	R.GEVGLP(+15.99)GLSGPVGPP(+15.99)GNP(+15.99)GANGLTGAK.G	Y	94.15	2417.2185	27	0.4	1209.6171	2	44.08	2.0106E8	2.1069E8	1.8902E8	1.0065E8	1.1629E8	1.3423E8	1.1521E8	1.2198E8	1.186E8	1.1461E8	1.151E8	1.9804E7	2.0973E7	1.7397E7	8.6888E6	7.2238E6	6.1141E6	2.3334E7	2.127E7	2.7456E7	1.7938E8	2.2363E8	1.9652E7	2.0338E7	2.0936E7	1.0754E8	1.0783E8	1.2294E8	3.1392E6	5.3935E6	2	F2:14838	3399_02.raw	55	2	2	2	2
2	1	P08123|CO1A2_HUMAN	R.TGEVGAVGPP(+15.99)GFAGEKGP(+15.99)SGEAGTAGPP(+15.99)GTP(+15.99)GPQGLLGAP(+15.99)GILGLP(+15.99)GSR.G	Y	93.58	4442.1987	49	1.5	1111.5586	4	56.07	1.4227E8	1.3823E8	1.3069E8	1.4246E7	9.098E7	3.4911E7	3.8524E7	4.0339E7	4.1815E7	3.8849E7	5.1337E7										1.2116E8	1.3837E8	7.4432E6	4.1408E6		4.6985E7	4.6044E7	4.5386E7			7	F7:18570	3849_02.raw	29	2	2	2	1
2	1	P08123|CO1A2_HUMAN	R.TGEVGAVGP(+15.99)PGFAGEKGPSGEAGTAGPP(+15.99)GTPGP(+15.99)QGLLGAP(+15.99)GILGLP(+15.99)GSR.G	Y	92.95	4426.2036	49	0.1	1476.4087	3	56.20						3.5549E7	8.2127E6																								7	F7:18562	3849_02.raw	2	0	0	0	0
2	1	P08123|CO1A2_HUMAN	K.GPSGEAGTAGP(+15.99)P(+15.99)GTP(+15.99)GPQGLLGAP(+15.99)GILGLP(+15.99)GSR.G	Y	92.94	2972.4836	33	0.9	991.8361	3	55.05	7.6049E6	7.3177E6	6.9001E6	5.3548E6	0	7.1059E6	5.3188E6	4.3269E6	6.1881E6	5.7538E6	5.4008E6	5.6198E5	1.3632E6	0				0	0	3.7817E5	8.079E6	8.5502E6	3.2052E5	0	0	2.7696E6	2.6711E6	2.5357E6			7	F7:18252	3849_02.raw	19	1	1	1	1
2	1	P08123|CO1A2_HUMAN	K.GPSGEAGTAGP(+15.99)PGTP(+15.99)GPQGLLGAP(+15.99)GILGLP(+15.99)GSR.G	Y	91.93	2956.4888	33	-2.4	1479.2480	2	55.54	0	7.9243E8	5.2896E5	1.6697E7		3.4823E8	2.5989E8	2.5161E8	0	4.8906E8	0	0	4.9396E7	4.6211E6			1.7855E7		4.574E7	4.857E7	0	4.9915E5	4.26E7	4.2097E7	4.5497E7	0	3.1878E8	3.0433E8	1.1341E7	0	17	F17:18953	4406_03.raw	32	0	2	1	1
2	1	P08123|CO1A2_HUMAN	K.GEQGPP(+15.99)GPP(+15.99)GFQGLP(+15.99)GPSGPAGEVGKPGER.G	Y	90.92	2857.3630	30	2.9	953.4644	3	35.87	2.3694E7	1.8443E7	2.1417E7	1.8136E7	1.7631E7	3.088E7	3.2722E7	3.3139E7											3.8975E6	5.3237E6	4.2416E7	5.186E7				2.7734E7	2.6522E7	2.2206E7			2	F2:11966	3399_02.raw	15	1	1	1	1
2	1	P08123|CO1A2_HUMAN	R.GPSGPP(+15.99)GPDGNKGEP(+15.99)GVVGAVGTAGPSGPSGLP(+15.99)GER.G	Y	90.10	3212.5332	36	0.3	1071.8521	3	32.20	6.6292E7	6.4416E7	2.3316E7	7.5366E6	7.9237E6	2.2627E7	1.2297E7	1.2981E7													3.7328E7	5.921E7	7.5165E6	1.2369E7	8.215E6	4.2886E7	3.7079E7	4.8863E7			2	F2:10531	3399_02.raw	25	2	2	1	1
2	1	P08123|CO1A2_HUMAN	K.GEQGP(+15.99)P(+15.99)GPP(+15.99)GFQGLP(+15.99)GPSGPAGEVGKP(+15.99)GER.G	Y	89.96	2889.3528	30	1.1	964.1259	3	35.26	3.2492E7	4.3422E7	3.532E7	5.9029E7	6.0191E7	9.5309E7	7.3786E7	8.441E7	1.9116E7	0	0							1.9525E7	2.1248E7	2.0635E7	8.4943E7	1.1542E8				4.7666E7	4.4794E7	4.452E7	8.5964E6	9.0892E6	7	F7:11509	3849_02.raw	24	1	2	1	1
2	1	P08123|CO1A2_HUMAN	K.GENGVVGPTGPVGAAGPAGPNGP(+15.99)P(+15.99)GPAGSR.G	Y	89.87	2582.2473	30	1.6	861.7578	3	30.47	6.6928E7	6.3382E7	6.7277E7	7.0827E7	7.0203E7	6.5398E7	4.8875E7	5.3051E7	5.363E7	5.9386E7	5.934E7	1.7331E7	1.4782E7	1.0987E7	1.0591E7	7.5838E6	7.2668E6	1.086E7	1.3348E7	1.1003E7	6.1151E7	8.7742E7	1.2253E7	9.6795E6	1.0695E7	4.6124E7	4.5607E7	4.2316E7	3.848E6	4.807E6	2	F2:9948	3399_02.raw	48	2	2	2	2
2	1	P08123|CO1A2_HUMAN	K.GEQGPP(+15.99)GP(+15.99)PGFQGLP(+15.99)GPSGPAGEVGKP(+15.99)GER.G	Y	89.68	2873.3579	30	0.7	719.3473	4	36.27	5.8737E7	4.0267E8	5.8856E7	8.64E7	8.8824E7	5.4846E8	6.0218E7								2.0507E7							1.4098E8				4.3832E7	3.7468E8	6.2608E7	2.3521E7	2.3549E7	7	F7:11901	3849_02.raw	16	1	2	1	1
2	1	P08123|CO1A2_HUMAN	K.GPSGEAGTAGPP(+15.99)GTPGPQGLLGAP(+15.99)GILGLP(+15.99)GSR.G	Y	89.21	2940.4939	33	2.0	981.1739	3	55.45	1.3103E7	1.3299E7	1.2339E7	6.1525E6	6.2269E6	2.0975E6		1.5636E6	7.2582E6	8.0876E6	8.4942E6										9.0091E6	1.1147E7				1.4802E6	2.632E6	2.044E6			2	F2:18628	3399_02.raw	15	1	1	1	1
2	1	P08123|CO1A2_HUMAN	R.TGEVGAVGPP(+15.99)GFAGEKGPSGEAGTAGP(+15.99)PGTP(+15.99)GPQGLLGAP(+15.99)GILGLP(+15.99)GSR.G	Y	88.18	4426.2036	49	2.8	1107.5613	4	56.21	1.8021E8	2.0628E8	1.6871E8	5.1251E7	4.3751E7	4.4213E7	2.9712E7	2.723E7	1.7695E7	1.6768E7	1.6952E7									3.5004E6	1.545E8	2.259E8	1.3063E7	1.2448E7	1.2123E7	4.6528E7		4.9689E7		0	7	F7:18625	3849_02.raw	24	1	3	1	2
2	1	P08123|CO1A2_HUMAN	R.TGEVGAVGPP(+15.99)GFAGEKGP(+15.99)SGEAGTAGP(+15.99)PGTP(+15.99)GPQGLLGAP(+15.99)GILGLP(+15.99)GSR.G	Y	87.82	4442.1987	49	2.5	1481.7439	3	54.62	1.2487E8	1.3823E8	1.3069E8	7.8624E7	7.7242E7	4.3026E7	3.8524E7	7.1811E6	4.1815E7	7.2253E6	4.3031E7	0	0	0		0		0	4.0167E6	4.9984E6	1.2116E8	1.3837E8	7.4432E6		0	4.1585E7	5.1155E7	0			3	F3:18534	3399_03.raw	26	1	2	2	1
2	1	P08123|CO1A2_HUMAN	R.TGEVGAVGPPGFAGEKGP(+15.99)SGEAGTAGPP(+15.99)GTP(+15.99)GPQGLLGAP(+15.99)GILGLP(+15.99)GSR.G	Y	87.48	4426.2036	49	2.0	1476.4115	3	54.83																												8.1374E6			28	F28:18187	6401_03.raw	1	0	0	0	0
2	1	P08123|CO1A2_HUMAN	R.GEVGPAGPNGFAGPAGAAGQP(+15.99)GAK.G	Y	87.26	2049.9868	24	1.6	1026.0023	2	31.42	1.2322E8	1.1078E8	1.2555E8	1.0583E8	9.6181E7	9.9644E7	1.0058E8	9.2206E7	9.2399E7	1.0855E8	1.0544E8	3.114E7	2.8654E7	2.5728E7	1.3007E7	1.1483E7	1.2896E7	2.5253E7	3.0558E7	3.0769E7	9.4737E7	1.3289E8	1.7956E7	1.8785E7	1.8417E7	8.2514E7	8.3746E7	7.7137E7			7	F7:10149	3849_02.raw	57	2	2	2	2
2	1	P08123|CO1A2_HUMAN	R.GPP(+15.99)GAVGSP(+15.99)GVNGAP(+15.99)GEAGRDGNP(+15.99)GNDGPP(+15.99)GR.D	Y	86.23	2916.2981	32	1.4	973.1080	3	16.84	1.6632E7	1.5992E7	1.9296E7			1.1441E7															1.2166E7	1.3787E7									2	F2:4650	3399_02.raw	6	1	1	1	0
2	1	P08123|CO1A2_HUMAN	R.TGEVGAVGPP(+15.99)GFAGEKGP(+15.99)SGEAGTAGPP(+15.99)GTP(+15.99)GP(+15.99)QGLLGAP(+15.99)GILGLP(+15.99)GSR.G	Y	85.39	4458.1938	49	2.7	1115.5587	4	55.03																		0													18	F18:18251	4484_01.raw	0	0	0	0	0
2	1	P08123|CO1A2_HUMAN	R.TGEVGAVGP(+15.99)P(+15.99)GFAGEKGPSGEAGTAGP(+15.99)P(+15.99)GTP(+15.99)GPQGLLGAP(+15.99)GILGLP(+15.99)GSR.G	Y	85.08	4458.1938	49	7.3	1115.5638	4	55.79							0															0									7	F7:18496	3849_02.raw	0	0	0	0	0
2	1	P08123|CO1A2_HUMAN	R.TGEVGAVGP(+15.99)PGFAGEKGPSGEAGTAGP(+15.99)PGTP(+15.99)GPQGLLGAP(+15.99)GILGLP(+15.99)GSR.G	Y	84.79	4426.2036	49	-1.5	1476.4062	3	54.75	3.6436E7	1.7527E8	1.6871E8		5.1039E7	0	2.9712E7	2.723E7	2.0332E7	1.6768E7	0	0	2.0076E6	1.5857E6					3.3853E6		1.6022E8	2.3468E8	0	0		4.6528E7	6.3427E7	4.9689E7			11	F11:18567	4312_03.raw	23	1	2	1	0
2	1	P08123|CO1A2_HUMAN	R.TGEVGAVGP(+15.99)PGFAGEKGP(+15.99)SGEAGTAGPP(+15.99)GTP(+15.99)GPQGLLGAP(+15.99)GILGLP(+15.99)GSR.G	Y	84.35	4442.1987	49	-0.6	1481.7393	3	54.73									8.4854E6		4.3031E7																	4.5714E6			28	F28:18260	6401_03.raw	3	0	0	0	0
2	1	P08123|CO1A2_HUMAN	R.TGEVGAVGPP(+15.99)GFAGEKGPSGEAGTAGPP(+15.99)GTP(+15.99)GPQGLLGAP(+15.99)GILGLP(+15.99)GSR.G	Y	83.75	4426.2036	49	2.8	1107.5613	4	54.84	2.1665E8	3.1007E7	1.9781E8		7.2877E6		8.2127E6	7.7935E6			1.6952E7										2.9808E7	4.1604E7				9.0508E6	5.4723E7				11	F11:18627	4312_03.raw	13	2	1	2	0
2	1	P08123|CO1A2_HUMAN	R.TGEVGAVGP(+15.99)PGFAGEKGPSGEAGTAGPP(+15.99)GTP(+15.99)GPQGLLGAP(+15.99)GILGLP(+15.99)GSR.G	Y	83.44	4426.2036	49	1.5	1476.4106	3	55.14	6.5747E6		2.91E7	5.1251E7					2.6378E6	0											2.9808E7				1.2123E7			8.1374E6			10	F10:18617	4312_02.raw	8	1	0	1	2
2	1	P08123|CO1A2_HUMAN	R.GPSGP(+15.99)PGP(+15.99)DGNKGEP(+15.99)GVVGAVGTAGPSGPSGLP(+15.99)GER.G	Y	83.30	3228.5281	36	1.9	1077.1853	3	32.33																										2.5528E7					26	F26:10427	6401_01.raw	1	0	0	0	0
2	1	P08123|CO1A2_HUMAN	P.SGEAGTAGPP(+15.99)GTP(+15.99)GPQGLLGAP(+15.99)GILGLP(+15.99)GSR.G	Y	83.20	2802.4146	31	0.3	935.1458	3	55.53			0	9.0006E6	9.768E6	2.2489E7	1.8311E7	1.6169E7			2.4426E6											6.3581E6				5.376E6		5.7176E6			7	F7:18399	3849_02.raw	11	0	0	0	1
2	1	P08123|CO1A2_HUMAN	K.GEN(+.98)GVVGPTGPVGAAGPAGPNGPP(+15.99)GPAGSR.G	Y	82.87	2567.2363	30	1.7	1284.6276	2	34.04	4.0298E7	3.8689E7	2.4925E8	2.3807E7	1.3859E8	1.1697E8	1.8342E7	1.9834E7	2.7041E7	1.6479E8	1.7215E8				1.0359E7	1.0596E7				3.0675E6	1.7598E8	3.4954E7				1.0833E8	1.6207E7	1.4637E7			7	F7:11113	3849_02.raw	26	1	1	2	1
2	1	P08123|CO1A2_HUMAN	E.KGPSGEAGTAGPP(+15.99)GTP(+15.99)GPQGLLGAP(+15.99)GILGLP(+15.99)GSR.G	Y	82.59	3084.5837	34	-0.9	1029.2009	3	50.21	2.707E6	3.1115E6	3.5909E6			0	0	4.3901E5	0												2.708E6	3.44E6						0			2	F2:16849	3399_02.raw	6	1	1	1	0
2	1	P08123|CO1A2_HUMAN	E.AGTAGPP(+15.99)GTP(+15.99)GPQGLLGAP(+15.99)GILGLP(+15.99)GSR.G	Y	82.33	2529.3186	28	1.1	844.1144	3	54.19	1.3473E7	1.3175E7	1.2513E7	2.4333E7	2.6556E7	9.9256E6	8.5402E6	8.194E6	1.7408E7	1.6629E7	1.5803E7									6.274E5	6.6937E6	8.9237E6	2.0584E6	1.7098E6		9.8787E6	9.6483E6	7.788E6			2	F2:18203	3399_02.raw	26	1	1	2	2
2	1	P08123|CO1A2_HUMAN	K.GENGVVGPTGPVGAAGPAGPNGPP(+15.99)GPAGSRGDGGP(+15.99)P(+15.99)GMTGFP(+15.99)GAAGR.T	Y	81.99	4096.9043	47	1.5	1025.2349	4	34.75	2.7701E7	2.7442E7	2.6847E7				4.7839E6														1.7344E7	2.1596E7		2.4521E6			0	6.1451E6			1	F1:11561	3399_01.raw	8	1	1	1	0
2	1	P08123|CO1A2_HUMAN	R.TGEVGAVGP(+15.99)PGFAGEKGP(+15.99)SGEAGTAGP(+15.99)PGTPGP(+15.99)QGLLGAP(+15.99)GILGLP(+15.99)GSR.G	Y	81.74	4442.1987	49	-0.5	1481.7395	3	55.18																		0													18	F18:18301	4484_01.raw	0	0	0	0	0
2	1	P08123|CO1A2_HUMAN	R.GPSGPP(+15.99)GP(+15.99)DGNKGEP(+15.99)GVVGAVGTAGPSGPSGLPGER.G	Y	81.54	3212.5332	36	0.1	1071.8518	3	34.30		4.037E6																				4.6577E6									2	F2:11344	3399_02.raw	2	0	1	0	0
2	1	P08123|CO1A2_HUMAN	K.GEP(+15.99)GVVGAVGTAGPSGPSGLP(+15.99)GER.G	Y	81.31	2136.0447	24	1.3	1069.0310	2	35.21	8.7948E8	7.7483E8	8.1524E8	5.9565E8	5.3744E8	4.4632E8	3.7736E8	4.2339E8	5.9484E8	6.1961E8	6.3413E8	1.2083E8	1.1971E8	9.7925E7	7.8614E7	6.5695E7	6.112E7	1.0431E8	1.212E8	1.1805E8	6.3612E8	8.8297E8	9.1251E7	8.831E7	8.6327E7	4.681E8	4.625E8	4.5957E8	2.7108E7	2.9915E7	7	F7:11508	3849_02.raw	60	2	2	2	2
2	1	P08123|CO1A2_HUMAN	R.GSDGSVGPVGPAGPIGSAGPP(+15.99)GFPGAP(+15.99)GP(+15.99)K.G	Y	80.65	2588.2505	30	-0.2	1295.1323	2	43.49	2.3028E7	2.0521E7	2.8761E7				0	3.9967E6	0	0											0	0				0					1	F1:14666	3399_01.raw	5	1	1	2	0
2	1	P08123|CO1A2_HUMAN	K.GEQGPP(+15.99)GP(+15.99)PGFQGLP(+15.99)GPSGPAGEVGKPGER.G	Y	79.75	2857.3630	30	0.3	953.4619	3	36.42																		3.8722E6													18	F18:11843	4484_01.raw	1	0	0	0	0
2	1	P08123|CO1A2_HUMAN	K.GEP(+15.99)GVVGAVGTAGPSGPSGLPGER.G	Y	79.38	2120.0498	24	1.5	1061.0338	2	37.98	1.4701E8	1.3041E8	1.3657E8	8.7211E7	8.9946E7	5.6844E7	6.11E7	5.7803E7	1.27E8	1.2547E8	1.2706E8	1.5865E7	1.3306E7	1.211E7	2.1864E6			1.8905E7	2.0739E7	2.1077E7	1.1817E8	1.5978E8	6.8226E6	6.7595E6	6.9169E6	7.9047E7	7.2383E7	7.284E7	1.6978E6		7	F7:12539	3849_02.raw	49	2	2	2	2
2	1	P08123|CO1A2_HUMAN	R.TGPP(+15.99)GPSGISGPP(+15.99)GPP(+15.99)GPAGK.E	Y	78.88	1828.8954	21	2.0	915.4568	2	24.45	9.5284E7	9.7119E7	1.0355E8	3.624E7	3.3254E7	4.7573E7	5.2067E7	4.8495E7	6.5729E7	6.6114E7	6.2719E7	6.1959E6	5.9967E6	5.2879E6				6.7849E6	7.0361E6	7.323E6	6.5955E7	7.9684E7	4.5634E6	4.9268E6	4.1919E6	4.7521E7	4.4043E7	3.88E7			3	F3:7814	3399_03.raw	25	1	1	1	1
2	1	P08123|CO1A2_HUMAN	E.AGTAGP(+15.99)PGTP(+15.99)GPQGLLGAP(+15.99)GILGLP(+15.99)GSR.G	Y	78.48	2529.3186	28	1.1	844.1144	3	54.19	0	1.3175E7		2.2363E7		1.7374E6	9.7674E6	1.0114E7	1.558E7	1.5202E7	2.1394E6	3.1195E5	9.0237E5	0				1.0562E6	6.5639E5		6.6937E6			1.7098E6	1.7935E6		8.2522E5				2	F2:18124	3399_02.raw	18	0	1	0	1
2	1	P08123|CO1A2_HUMAN	R.GPP(+15.99)GAVGSP(+15.99)GVNGAP(+15.99)GEAGR.D	Y	78.25	1750.8234	20	1.0	876.4198	2	16.80	6.7444E8	6.3819E8	7.067E8	3.8823E8	4.0926E8	5.5147E8	5.5549E8	3.8796E8	3.7863E8	3.7669E8	4.1283E8	8.3414E7	8.7655E7	6.6421E7	5.2255E7	4.927E7	5.0947E7	8.346E7	9.9467E7	8.045E7	2.655E8	5.432E8	6.5089E7	5.9967E7	4.1304E7	3.5867E8	3.8576E8	3.6212E8	1.7411E7	1.4749E7	24	F24:4514	6313_02.raw	51	2	2	3	2
2	1	P08123|CO1A2_HUMAN	R.TGEVGAVGPPGFAGEKGPSGEAGTAGP(+15.99)P(+15.99)GTP(+15.99)GPQGLLGAP(+15.99)GILGLP(+15.99)GSR.G	Y	78.15	4426.2036	49	-1.6	1107.5564	4	56.96					0		0																								7	F7:18883	3849_02.raw	0	0	0	0	0
2	1	P08123|CO1A2_HUMAN	R.TGP(+15.99)P(+15.99)GPSGISGPP(+15.99)GPP(+15.99)GPAGK.E	Y	78.13	1844.8903	21	0.2	923.4526	2	23.03	7.2137E8	6.5632E8	6.4833E8	3.6033E8	3.6111E8	3.5002E8	3.2646E8	3.1031E8	3.5332E8	3.7089E8	3.8402E8	4.7816E7	5.5222E7	4.8225E7	2.2603E7	2.3897E7	2.2633E7	6.2353E7	6.3979E7	6.737E7	3.5378E8	4.8386E8	7.2625E7	6.6536E7	6.5284E7	2.9169E8	2.8345E8	2.6251E8	5.6686E6	4.2871E6	2	F2:7194	3399_02.raw	55	2	2	2	2
2	1	P08123|CO1A2_HUMAN	K.GEN(+.98)GVVGPTGPVGAAGPAGPNGP(+15.99)P(+15.99)GPAGSR.G	Y	78.09	2583.2312	30	3.4	1292.6273	2	31.70	1.0605E7		1.0074E7	0	8.7726E6	1.4198E7	6.5741E6	2.4085E6	1.281E7	0	1.5379E7			3.2575E6				2.276E6			1.2777E7						9.0554E5	7.9196E6			4	F4:10383	3484_02.raw	15	1	0	1	0
2	1	P08123|CO1A2_HUMAN	R.GYP(+15.99)GNIGPVGAAGAP(+15.99)GPHGPVGPAGK.H	Y	77.73	2283.1394	26	1.1	762.0546	3	29.98	9.0518E8	8.5351E8	9.5084E8	7.5442E8	6.8913E8	4.6272E8	4.395E8	4.2693E8	4.9094E8	5.4225E8	5.2488E8	8.7231E7	8.2422E7	7.3781E7	5.7852E7	4.1952E7	5.3399E7	1.0816E8	1.1545E8	9.1082E7	6.2293E8	8.8308E8	0		0	5.7527E8	5.7749E8	5.3993E8	1.9817E7	2.5644E7	2	F2:9628	3399_02.raw	34	2	2	2	2
2	1	P08123|CO1A2_HUMAN	K.GEQGPP(+15.99)GPP(+15.99)GFQGLP(+15.99)GP(+15.99)SGPAGEVGKP(+15.99)GER.G	Y	77.66	2889.3528	30	1.0	964.1259	3	32.15	1.0626E7	9.63E6		1.3403E7		1.5377E7	2.1635E7	1.836E7													2.1551E7	2.4448E7				1.3208E7	1.1559E7	1.0051E7			26	F26:10391	6401_01.raw	11	1	1	0	1
2	1	P08123|CO1A2_HUMAN	R.TGEVGAVGP(+15.99)PGFAGEKGP(+15.99)SGEAGTAGP(+15.99)PGTPGPQGLLGAP(+15.99)GILGLP(+15.99)GSR.G	Y	77.19	4426.2036	49	5.2	1107.5640	4	55.76											0										0										11	F11:18905	4312_03.raw	0	0	0	0	0
2	1	P08123|CO1A2_HUMAN	K.HGN(+.98)RGETGPSGPVGPAGAVGPR.G	Y	76.84	2026.9933	22	0.8	676.6722	3	21.02	1.0185E8	1.0188E8	1.1187E8	2.4767E7	2.4378E7	3.9135E7	3.6868E7	2.2788E7	2.784E7	2.6913E7	2.6936E7		1.0815E6	5.8474E5				1.6995E6	1.7691E6	1.8381E6	9.6937E7	1.3519E8	3.2407E6			2.7045E7	2.8962E7	2.598E7			2	F2:6354	3399_02.raw	29	2	2	2	1
2	1	P08123|CO1A2_HUMAN	R.GPN(+.98)GEAGSAGPP(+15.99)GPP(+15.99)GLR.G	Y	76.78	1619.7539	18	-2.1	810.8826	2	24.55	8.7441E7	9.1735E7	8.5985E7	7.0963E7	6.6117E7	6.9016E7	5.8241E7	6.6216E7	1.0774E8	1.1422E8	1.1546E8	1.1568E7	1.3609E7	1.3084E7	1.2035E7	1.2687E7	8.6612E6	1.6318E7	1.7091E7	1.5714E7	6.0229E7	7.6052E7	3.734E6	3.2947E6	3.0777E6	5.4298E7	4.7873E7	4.5044E7	0		7	F7:7670	3849_02.raw	28	1	1	1	1
2	1	P08123|CO1A2_HUMAN	R.GEVGPAGPN(+.98)GFAGPAGAAGQP(+15.99)GAK(+15.99).G	Y	76.61	2066.9656	24	2.3	1034.4924	2	32.49	1.5615E8	1.5876E8	1.691E8	8.3486E7	7.839E7	3.1324E7	6.9739E7	6.8424E7	1.0585E8	9.2734E7	8.9747E7	3.709E6	4.2731E6	3.2297E6				3.8974E6	3.3589E6		1.1642E8	1.6039E8	1.5862E6	1.3773E6		6.9621E7	6.7493E7	6.2387E7			7	F7:10587	3849_02.raw	41	2	2	2	2
2	1	P08123|CO1A2_HUMAN	R.GPSGPP(+15.99)GPDGNKGEP(+15.99)GVVGAVGTAGPSGPSGLPGER.G	Y	76.46	3196.5383	36	0.9	1066.5210	3	34.47	1.1108E7	5.0573E6																			4.3629E6	4.2901E6									2	F2:11389	3399_02.raw	5	2	1	0	0
2	1	P08123|CO1A2_HUMAN	R.GAP(+15.99)GAVGAP(+15.99)GPAGATGDRGEAGAAGP(+15.99)AGPAGPR.G	Y	76.28	2742.3069	33	1.3	915.1108	3	20.32	4.7565E7	4.3504E7	4.3146E7	1.7475E7	1.7094E7	2.4312E7	2.7134E7	2.8199E7	1.463E7	1.5899E7	1.6301E7							4.9996E6	4.3378E6		3.2258E7	4.4666E7			6.0262E6	2.2399E7	2.085E7	2.0887E7			2	F2:6084	3399_02.raw	21	1	1	1	1
2	1	P08123|CO1A2_HUMAN	R.GLP(+15.99)GVAGAVGEP(+15.99)GPLGIAGPP(+15.99)GAR.G	Y	76.14	2114.1118	24	0.6	1058.0638	2	47.50	1.7946E9	1.71E9	1.7121E9	1.0479E9	1.1163E9	5.2859E8	5.2192E8	4.8821E8	1.0264E9	9.931E8	9.7422E8	1.3072E8	1.3347E8	1.1655E8	7.1995E7	6.1639E7	6.2987E7	1.6609E8	1.6004E8	1.5822E8	1.436E9	1.807E9	1.4534E8	1.4649E8	1.4634E8	8.6129E8	8.2992E8	8.4376E8	2.4364E7	6.0509E7	7	F7:15829	3849_02.raw	62	2	2	3	2
2	1	P08123|CO1A2_HUMAN	R.GAP(+15.99)GPDGNNGAQGPP(+15.99)GPQGVQGGK.G	Y	76.01	2144.9834	24	1.0	1073.5000	2	18.21	2.7899E8	5.5474E7	2.9168E8	1.4046E8	1.4177E8	3.8496E7	1.3732E8	3.7212E7	1.4982E8	1.4059E8	3.8097E7	3.7199E7	3.6498E7	1.0153E7	2.3862E7	2.2537E7	6.3554E6	4.1254E7	1.2697E7		1.4613E8	2.0399E8	3.942E7	0	3.8808E7	3.5658E7	1.6142E8	3.0953E7			7	F7:5086	3849_02.raw	43	2	1	2	2
2	1	P08123|CO1A2_HUMAN	K.GESGN(+.98)KGEP(+15.99)GSAGPQGPP(+15.99)GPSGEEGK.R	Y	75.99	2396.0364	26	-0.3	799.6858	3	14.64	9.7244E6	9.1452E6	1.0959E7				3.9107E6														4.9073E6	7.2763E6				4.6467E6	5.1645E6	4.0328E6			28	F28:3704	6401_03.raw	9	1	1	1	0
2	1	P08123|CO1A2_HUMAN	K.GEN(+.98)GVVGPTGPVGAAGPAGPN(+.98)GPP(+15.99)GPAGSR.G	Y	75.98	2568.2205	30	2.8	857.0832	3	33.66	0	0	0		1.794E7	8.6094E6	8.9818E6	0	1.7742E7		0										2.3301E7	3.4038E7				1.4754E7	1.0031E7	1.3084E7			2	F2:11097	3399_02.raw	11	0	0	0	0
2	1	P08123|CO1A2_HUMAN	R.GEVGPAGPN(+.98)GFAGPAGAAGQP(+15.99)GAK.G	Y	75.93	2050.9707	24	1.6	684.6653	3	31.43	3.6659E7	3.9912E7	3.8939E7	2.4041E7	1.8648E7	4.142E7	3.7912E7	3.9169E7	2.3681E7	2.3037E7	3.0345E7	6.3405E6	5.3908E6	4.5812E6				4.5062E6	4.1328E6	4.2362E6	3.1234E7	6.4667E7	3.6051E6	3.7839E6	3.332E6	1.9946E7	1.9301E7	2.1835E7			2	F2:10284	3399_02.raw	30	1	2	1	1
2	1	P08123|CO1A2_HUMAN	R.TGP(+15.99)P(+15.99)GPSGISGP(+15.99)P(+15.99)GP(+15.99)P(+15.99)GPAGK.E	Y	75.60	1876.8801	21	3.3	939.4504	2	20.31	6.8211E7	3.5255E7	7.1094E7	3.9146E7	4.1937E7	6.8079E7	4.2372E7	6.0882E7	3.5714E7	3.6482E7	6.412E7	1.8954E7	1.8416E7	1.238E7	8.372E6	9.574E6	8.6253E6	8.873E6	7.6085E6	8.6589E6	2.0714E7	5.6151E7	7.7022E6	1.5517E7	1.4058E7	1.9317E7	3.3361E7	3.3148E7	3.2821E6	2.5781E6	7	F7:5847	3849_02.raw	44	2	1	2	2
2	1	P08123|CO1A2_HUMAN	R.TGEVGAVGPPGFAGEKGP(+15.99)SGEAGTAGP(+15.99)PGTP(+15.99)GPQGLLGAP(+15.99)GILGLP(+15.99)GSR.G	Y	75.56	4426.2036	49	0.6	1476.4094	3	54.87																			0				1.3063E7				8.704E6				27	F27:18247	6401_02.raw	2	0	0	0	0
2	1	P08123|CO1A2_HUMAN	R.GPNGEAGSAGPP(+15.99)GPP(+15.99)GLR.G	Y	75.12	1618.7699	18	-2.7	810.3901	2	23.49	3.742E8	3.5412E8	4.0497E8	3.2511E8	3.4056E8	2.7353E8	2.4658E8	2.3373E8	3.0705E8	3.148E8	3.2337E8	4.8829E7	5.0772E7	4.5158E7	3.9881E7	3.6045E7	3.6312E7	5.8615E7	5.7634E7	6.1292E7	2.2101E8	3.0903E8	2.1553E7	1.8966E7	1.8759E7	2.073E8	2.0462E8	1.9236E8	1.5832E6	1.6923E6	7	F7:7099	3849_02.raw	47	2	2	2	2
2	1	P08123|CO1A2_HUMAN	R.GP(+15.99)P(+15.99)GAAGAP(+15.99)GPQGFQGPAGEP(+15.99)GEP(+15.99)GQTGPAGAR.G	Y	75.05	2974.3440	33	3.7	992.4590	3	26.95	1.0767E7					9.5785E6	8.0417E6	8.3558E6		1.1574E7											8.301E6	1.0784E7					5.719E6				1	F1:8636	3399_01.raw	8	1	0	0	0
2	1	P08123|CO1A2_HUMAN	R.GAP(+15.99)GPDGN(+.98)NGAQGPP(+15.99)GPQGVQGGK.G	Y	74.27	2145.9675	24	2.3	1073.9935	2	17.55	2.8431E7	3.003E7	3.8473E7	7.1409E7	1.7505E7	6.6512E7	7.5617E7	4.529E7	8.5248E7	5.896E7	7.3699E7			7.8315E6								1.2067E8		1.4377E7	0	7.6927E7		7.371E7			2	F2:4958	3399_02.raw	24	1	1	1	2
2	1	P08123|CO1A2_HUMAN	K.GEIGAVGN(+.98)AGPAGPAGPR.G	Y	74.04	1547.7692	18	2.8	774.8940	2	28.89	5.6327E7	3.5549E7	4.4087E7	6.1435E7	5.6916E7	7.2668E7	6.5731E7	5.9629E7	6.5506E7	6.8609E7	7.148E7	1.8909E7	1.8614E7	1.6951E7	1.0073E7	1.0122E7	9.6724E6	1.3771E7	1.5119E7	1.3883E7	8.2227E7	1.1444E8	7.5689E6	8.6033E6	7.7346E6	5.2724E7	5.1258E7	4.5581E7	3.4711E6	2.8909E6	7	F7:9282	3849_02.raw	43	2	1	1	2
2	1	P08123|CO1A2_HUMAN	K.GEP(+15.99)GSAGPQGPP(+15.99)GPSGEEGK.R	Y	74.02	1822.7969	20	1.0	912.4066	2	15.53	3.5496E8	3.3199E8	3.5896E8	2.1348E8	1.9443E8	2.9324E8	3.1405E8	2.7184E8	2.1589E8	2.2964E8	2.4503E8	4.5828E7	4.706E7	4.2515E7	4.0032E7	4.193E7	4.0549E7	5.6466E7	6.0974E7	5.9046E7	2.154E8	2.7676E8	3.2756E7	3.2746E7	3.0542E7	2.0189E8	2.1736E8	2.021E8	8.3478E6	1.0287E7	24	F24:4053	6313_02.raw	58	2	2	2	2
2	1	P08123|CO1A2_HUMAN	R.TGEVGAVGP(+15.99)PGFAGEKGPSGEAGTAGP(+15.99)P(+15.99)GTP(+15.99)GPQGLLGAP(+15.99)GILGLP(+15.99)GSR.G	Y	73.82	4442.1987	49	1.5	1111.5586	4	56.07				0			3.154E7								0																7	F7:18804	3849_02.raw	1	0	0	0	0
2	1	P08123|CO1A2_HUMAN	R.GETGPSGPVGPAGAVGPR.G	Y	73.71	1561.7848	18	0.3	781.8999	2	27.53	1.4097E9	1.2889E9	1.4142E9	9.6585E8	9.2585E8	7.5428E8	7.7272E8	7.223E8	1.0239E9	1.0936E9	1.0966E9	1.6852E8	1.7457E8	1.4574E8	1.5437E8	1.0688E8	1.2963E8	1.6916E8	1.827E8	1.8967E8	8.3318E8	1.1169E9	1.2057E8	1.2144E8	1.0376E8	6.4264E8	6.6834E8	6.0499E8	1.2881E7	1.2463E7	7	F7:8693	3849_02.raw	78	3	3	3	3
2	1	P08123|CO1A2_HUMAN	R.GEVGLP(+15.99)GLSGPVGP(+15.99)P(+15.99)GNP(+15.99)GANGLTGAK.G	Y	73.57	2433.2134	27	4.2	1217.6190	2	42.88	1.5415E8	1.6984E8	2.4827E8	9.9701E7	1.0778E8	8.4672E7	7.9827E7	8.6986E7	8.1671E7	6.5901E7	8.1175E7	7.9931E6	1.0109E7	5.6582E6		5.7691E6	6.9511E6	1.0556E7	8.8013E6	1.1512E7	1.143E8	1.4126E8	1.1899E7	1.1359E7	1.0983E7	8.0315E7	8.3668E7	1.0252E8			3	F3:14483	3399_03.raw	69	2	3	4	2
2	1	P08123|CO1A2_HUMAN	R.GAP(+15.99)GPDGNN(+.98)GAQGPP(+15.99)GPQGVQGGK.G	Y	73.23	2145.9675	24	0.8	1073.9919	2	18.79	2.8431E7	1.1142E8	3.8473E7	1.6617E7	1.7505E7		2.8333E7	2.459E7		2.3028E7		3.4616E6		0					6.3676E6		7.2681E7										7	F7:5324	3849_02.raw	11	1	1	1	1
2	1	P08123|CO1A2_HUMAN	R.TGP(+15.99)P(+15.99)GPSGISGPP(+15.99)GP(+15.99)P(+15.99)GPAGK.E	Y	72.97	1860.8853	21	1.6	931.4514	2	20.92	8.4046E7	4.0798E7	4.3414E7	7.2578E7	6.7294E7	5.7174E7	5.9447E7	5.6139E7	6.2244E7	2.6444E7	6.6115E7	1.08E7	1.191E7	1.0204E7	5.8612E6	6.9215E6	6.5407E6	1.7496E7	1.0352E7	1.0065E7	5.6815E7	7.1757E7	1.9997E7	1.9765E7	2.0047E7	4.562E7	4.4625E7	1.8873E7		1.2749E6	2	F2:6294	3399_02.raw	45	2	1	1	2
2	1	P08123|CO1A2_HUMAN	K.GENGVVGPTGPVGAAGP(+15.99)AGPNGPP(+15.99)GPAGSR.G	Y	72.89	2582.2473	30	1.1	861.7573	3	29.53	1.6244E7	1.3325E7	1.5336E7	5.3873E6	1.0294E7	0		7.2617E6													8.8621E6	1.3225E7				7.0867E6	7.494E6	7.1065E6			2	F2:9539	3399_02.raw	11	1	1	1	1
2	1	P08123|CO1A2_HUMAN	K.GEP(+15.99)GSAGPQGPPGPSGEEGK.R	Y	72.88	1806.8019	20	0.3	904.4084	2	16.57	1.5988E7	2.3828E7	1.7646E7	8.229E6	7.6508E6	2.336E7	2.0083E7	1.9985E7	1.7284E7	1.3287E7	1.4577E7	2.2675E6	1.8177E6	2.5459E6		0		3.2207E6	3.2343E6	3.6607E6	1.2625E7	1.3097E7	9.5241E5	8.1832E5		9.6401E6	1.4359E7	1.0912E7			2	F2:4586	3399_02.raw	29	1	2	1	1
2	1	P08123|CO1A2_HUMAN	K.GP(+15.99)SGEAGTAGPPGTP(+15.99)GPQGLLGAP(+15.99)GILGLP(+15.99)GSR.G	Y	72.39	2956.4888	33	-6.7	1479.2417	2	55.80									0																		0				27	F27:18617	6401_02.raw	0	0	0	0	0
2	1	P08123|CO1A2_HUMAN	R.TGEVGAVGP(+15.99)PGFAGEKGP(+15.99)SGEAGTAGPPGTP(+15.99)GPQGLLGAP(+15.99)GILGLP(+15.99)GSR.G	Y	72.26	4426.2036	49	3.4	1107.5619	4	55.06																						0							0		29	F29:18146	6474_01.raw	0	0	0	0	0
2	1	P08123|CO1A2_HUMAN	R.GAP(+15.99)GAVGAPGP(+15.99)AGATGDRGEAGAAGPAGPAGPR.G	Y	72.25	2726.3120	33	2.1	1364.1661	2	23.51						3.3627E6		4.4361E6			3.4365E8																				8	F8:7178	3849_03.raw	3	0	0	0	0
2	1	P08123|CO1A2_HUMAN	R.GSDGSVGPVGPAGPIGSAGPP(+15.99)GFPGAP(+15.99)GPK(+178.05)GEIGAVGNAGPAGPAGPR.G	Y	72.16	4279.0781	48	1.8	1070.7787	4	46.75	5.5057E7	4.3634E7	4.9336E7	7.7417E7	7.988E7	5.6526E7	4.7655E7	4.1482E7	6.4854E7	7.2487E7	6.0193E7		1.7197E6					4.9139E6	4.173E6		9.6325E7	1.0053E8	3.213E6	4.5061E6		4.8107E7	6.3149E7	5.7221E7			7	F7:15497	3849_02.raw	23	1	1	1	1
2	1	P08123|CO1A2_HUMAN	R.GAPGP(+15.99)DGNNGAQGPP(+15.99)GPQGVQGGK.G	Y	71.97	2144.9834	24	1.3	1073.5004	2	17.15	2.1425E8	2.5497E8	2.2174E8	1.1314E8	1.4177E8	1.4828E8	1.3732E8	9.0887E7	1.4982E8	1.0664E8	1.6008E8	3.7199E7	3.6498E7	3.2365E7	1.8435E7	1.6049E7	1.4757E7	4.1254E7	3.9874E7	3.8536E7	1.4613E8	2.0399E8	3.942E7	3.5022E7	3.8808E7	1.4742E8	1.6142E8	1.2742E8	7.1827E6	7.1358E6	24	F24:4609	6313_02.raw	49	1	2	1	1
2	1	P08123|CO1A2_HUMAN	R.GEVGPAGPN(+.98)GFAGPAGAAGQP(+15.99)GAK(+15.99)GER.G	Y	71.82	2409.1309	27	0.3	804.0511	3	28.15	2.5394E7	3.4816E7	3.2766E7	1.3241E7	1.1244E7	2.1252E7	1.7919E7	1.6908E7			9.0799E6										2.2307E7	3.2465E7				1.8946E7	1.3E7	1.5076E7			2	F2:9051	3399_02.raw	14	1	1	1	1
2	1	P08123|CO1A2_HUMAN	K.GEQGPP(+15.99)GPP(+15.99)GFQGLP(+15.99)GPSGPAGEVGK.P	Y	71.76	2418.1450	26	1.2	1210.0812	2	40.06	1.2449E7	1.1484E7	1.0814E7	4.2257E7	4.7684E7	3.2928E7	3.5683E7	3.4036E7										7.8584E6	8.7122E6	7.1004E6	1.6042E7	2.0358E7				3.4275E7	3.4612E7	2.9212E7			7	F7:13243	3849_02.raw	23	1	1	1	2
2	1	P08123|CO1A2_HUMAN	R.TGEVGAVGPP(+15.99)GFAGEKGP(+15.99)SGEAGTAGP(+15.99)PGTPGPQGLLGAP(+15.99)GILGLP(+15.99)GSR.G	Y	71.52	4426.2036	49	2.5	1107.5609	4	55.86															0																15	F15:19250	4406_01.raw	0	0	0	0	0
2	1	P08123|CO1A2_HUMAN	K.GPSGEAGTAGP(+15.99)P(+15.99)GTPGP(+15.99)QGLLGAP(+15.99)GILGLP(+15.99)GSR.G	Y	71.37	2972.4836	33	-0.4	991.8347	3	53.96									6.1881E6																		0				27	F27:17999	6401_02.raw	1	0	0	0	0
2	1	P08123|CO1A2_HUMAN	R.GYP(+15.99)GN(+.98)IGPVGAAGAP(+15.99)GPHGPVGPAGK.H	Y	71.29	2284.1235	26	2.8	1143.0723	2	30.67	1.9211E8	1.7325E8	1.8472E8	1.1891E8	1.0798E8	7.0196E7	5.5414E7	0	8.7102E7	9.5532E7	9.7986E7										1.6068E8	2.3633E8			0	1.0973E8	1.0597E8	9.7034E7			5	F5:9981	3484_03_r.raw	16	1	1	1	1
2	1	P08123|CO1A2_HUMAN	K.GEQGPP(+15.99)GP(+15.99)PGFQGLP(+15.99)GP(+15.99)SGPAGEVGKP(+15.99)GER.G	Y	71.27	2889.3528	30	3.9	964.1287	3	31.91					9.9422E6																										5	F5:10446	3484_03_r.raw	1	0	0	0	0
2	1	P08123|CO1A2_HUMAN	R.GPSGPP(+15.99)GPDGN(+.98)KGEP(+15.99)GVVGAVGTAGPSGPSGLPGER.G	Y	70.79	3197.5225	36	3.9	1066.8523	3	34.96	0	5.6772E6	4.1579E6																		5.5773E6	8.9464E6						1.6087E6			22	F22:11571	5289_03_r.raw	5	0	1	1	0
2	1	P08123|CO1A2_HUMAN	R.GPP(+15.99)GESGAAGPTGPIGSR.G	Y	70.40	1579.7589	18	0.8	790.8874	2	21.12	1.3849E9	1.2842E9	1.4391E9	8.4354E8	9.2409E8	1.0712E9	1.0497E9	1.0024E9	8.8226E8	8.45E8	9.3185E8	1.6292E8	1.7181E8	1.5687E8	1.3321E8	1.3444E8	1.2601E8	1.7042E8	1.8904E8	1.8565E8	8.5815E8	1.2529E9	1.1993E8	1.1462E8	1.1243E8	6.7399E8	6.9346E8	6.5193E8	3.6435E7	3.7561E7	2	F2:6459	3399_02.raw	51	2	2	2	2
2	1	P08123|CO1A2_HUMAN	K.EGPVGLP(+15.99)GIDGRPGPIGPAGAR.G	Y	70.27	2055.0859	22	0.4	686.0362	3	42.06	8.4476E8	7.318E8	7.4813E8	3.568E8	3.8506E8	4.1199E8	3.9965E8	3.7621E8	3.9685E8	3.6334E8	3.9054E8	6.3619E7	6.2663E7	6.3619E7	3.3564E7	2.9556E7	3.1923E7	7.6804E7	7.6668E7	7.8358E7	6.8064E8	8.804E8	7.3373E7	7.7759E7	7.36E7	4.0558E8	4.0947E8	3.6801E8	2.2168E7	2.2337E7	7	F7:14049	3849_02.raw	46	2	2	2	2
2	1	P08123|CO1A2_HUMAN	R.GLHGEFGLP(+15.99)GPAGPR.G	Y	70.13	1476.7473	15	0.1	739.3810	2	34.86	9.4947E8	8.6306E8	9.6855E8	7.3391E8	7.4331E8	4.9084E8	4.6294E8	4.567E8	5.187E8	5.4367E8	5.378E8	4.6563E7	5.1886E7	4.9654E7	5.4088E7	4.1333E7	3.9144E7	9.3665E7	1.0315E8	1.0343E8	7.6173E8	1.0518E9	4.0002E7	3.5045E7	4.0386E7	5.1466E8	5.0069E8	4.8068E8	6.4922E6	9.0075E6	7	F7:11403	3849_02.raw	68	2	2	2	3
2	1	P08123|CO1A2_HUMAN	K.GEQGP(+15.99)PGPP(+15.99)GFQGLP(+15.99)GPSGPAGEVGKP(+15.99)GER.G	Y	69.99	2873.3579	30	1.7	958.7949	3	34.79					4.5623E8			5.7434E7																							5	F5:11912	3484_03_r.raw	2	0	0	0	0
2	1	P08123|CO1A2_HUMAN	K.GESGNKGEP(+15.99)GSAGPQGPP(+15.99)GPSGEEGK.R	Y	69.46	2395.0522	26	1.5	799.3592	3	14.45	0	0	0				0	7.7334E5													0	0	2.5047E6	2.7514E6				0			23	F23:3663	6313_01.raw	3	0	0	0	0
2	1	P08123|CO1A2_HUMAN	R.GP(+15.99)P(+15.99)GESGAAGPTGPIGSR.G	Y	68.68	1595.7539	18	0.9	798.8849	2	21.34	3.0357E7	2.7254E7	2.8572E7	1.6265E7	1.6066E7	3.2016E7	3.0504E7	2.8854E7	2.7323E7	2.8096E7	2.9388E7	8.2669E6	8.6591E6	7.8423E6	8.3135E6	7.3282E6	8.4109E6	4.0694E6	4.485E6	4.3175E6	1.6117E7	2.277E7	3.9674E6	4.0021E6	3.7647E6	1.1682E7	1.1958E7	1.1488E7	2.3378E6	1.8918E6	7	F7:6346	3849_02.raw	30	1	1	1	1
2	1	P08123|CO1A2_HUMAN	R.GPNGEAGSAGP(+15.99)P(+15.99)GPP(+15.99)GLR.G	Y	68.46	1634.7648	18	1.0	818.3905	2	21.29	1.4648E7	1.1727E7	1.6407E7	1.1528E7	1.3523E7	1.7328E7	1.6417E7	1.6553E7	1.6081E7	1.6498E7	1.9085E7	5.0732E6	5.3484E6	4.5487E6	6.2153E6	3.7351E6	3.8374E6	3.7441E6	3.3444E6	3.6951E6	9.7072E6	1.0986E7				8.247E6	7.7737E6	7.116E6			7	F7:6332	3849_02.raw	25	1	1	1	1
2	1	P08123|CO1A2_HUMAN	R.GAPGP(+15.99)DGN(+.98)NGAQGPP(+15.99)GPQGVQGGK.G	Y	68.38	2145.9675	24	1.6	1073.9928	2	17.94	1.2187E8	1.1142E8	9.7244E7	7.1409E7	5.6573E7	4.7729E7	4.7284E7	4.529E7	8.5248E7	8.1988E7		8.0531E6	8.1101E6		6.0825E6			9.3345E6	1.1704E7	5.6595E6	7.2681E7	9.8054E7	1.6099E7			6.2593E7	6.3379E7	7.371E7			10	F10:5076	4312_02.raw	27	1	1	1	2
2	1	P08123|CO1A2_HUMAN	R.GPQGHQGPAGPP(+15.99)GPP(+15.99)GPP(+15.99)GPP(+15.99)GVSGG.G	Y	68.38	2273.0459	26	1.7	1137.5321	2	22.78	1.3087E7	1.3314E7	1.1358E7	6.7922E6	6.1562E6		7.7344E6	7.2589E6													6.8912E6	8.5008E6				7.0142E6	5.9716E6	5.241E6			22	F22:6938	5289_03_r.raw	12	1	1	1	1
2	1	P08123|CO1A2_HUMAN	R.GLP(+15.99)GVAGAVGEP(+15.99)GPLGIAGP(+15.99)PGAR.G	Y	68.05	2114.1118	24	2.8	1058.0662	2	47.37	6.8756E8	6.4919E8			4.2873E8	2.2113E8	0	2.2674E8	0	4.4005E8	0	6.4908E7	6.9042E7	1.1655E8	3.9758E7	2.7728E7	3.3829E7			7.8079E7	0		5.1594E7					3.2364E8	2.4364E7		16	F16:16237	4406_02.raw	17	1	1	0	0
2	1	P08123|CO1A2_HUMAN	R.GP(+15.99)PGAVGSP(+15.99)GVNGAP(+15.99)GEAGRDGNP(+15.99)GNDGPP(+15.99)GR.D	Y	68.01	2916.2981	32	0.0	730.0818	4	16.88	1.7801E6																														1	F1:4712	3399_01.raw	1	1	0	0	0
2	1	P08123|CO1A2_HUMAN	K.RGPNGEAGSAGPP(+15.99)GPP(+15.99)GLR.G	Y	67.99	1774.8710	19	0.1	888.4428	2	20.74	6.3328E8	5.7033E8	6.248E8	2.0817E8	2.2738E8	3.1342E8	3.0398E8	3.0644E8	2.1227E8	2.1827E8	2.263E8	4.4188E7	4.6925E7	3.994E7	2.4233E7	2.5852E7	2.5601E7	4.8286E7	4.3118E7	4.596E7	3.2646E8	4.6259E8	8.1649E7	7.4528E7	7.6569E7	2.5176E8	2.5258E8	2.4981E8	4.7681E6	4.6455E6	7	F7:6099	3849_02.raw	45	2	2	2	1
2	1	P08123|CO1A2_HUMAN	R.TGEVGAVGPP(+15.99)GFAGEKGPSGEAGTAGP(+15.99)P(+15.99)GTP(+15.99)GPQGLLGAP(+15.99)GILGLP(+15.99)GSR.G	Y	67.95	4442.1987	49	1.9	1111.5591	4	54.59																					1.0858E8	1.2143E8				4.1585E7	0				22	F22:18548	5289_03_r.raw	3	0	0	0	0
2	1	P08123|CO1A2_HUMAN	R.GERGPP(+15.99)GESGAAGPTGPIGSR.G	Y	67.62	1921.9241	21	1.1	641.6494	3	20.74	1.9697E8	1.9391E8	2.1219E8	5.3124E7	4.8606E7	8.5396E7	9.2382E7	9.1573E7	2.7455E7	2.4315E7	2.6331E7	9.6897E6	1.0215E7	9.1245E6	2.5807E6	4.1268E6		1.3616E7	1.3416E7	1.2658E7	1.1265E8	1.6023E8	3.9446E7	3.6875E7	3.6949E7	9.8065E7	9.5797E7	9.8603E7	3.1345E6	2.9901E6	7	F7:6153	3849_02.raw	30	1	1	2	1
2	1	P08123|CO1A2_HUMAN	R.TGP(+15.99)P(+15.99)GPSGISGP(+15.99)PGP(+15.99)P(+15.99)GPAGK.E	Y	67.22	1860.8853	21	1.2	931.4510	2	20.99																					2.946E7					2.6217E7					26	F26:6167	6401_01.raw	2	0	0	0	0
2	1	P08123|CO1A2_HUMAN	K.HGNRGETGPSGPVGPAGAVGPR.G	Y	67.10	2026.0093	22	-1.4	676.3428	3	21.78	3.8781E7	3.4902E7	3.4868E7	3.6788E6	4.3003E6	1.7701E7	2.0147E7	1.2588E7		3.5697E6	0										3.2704E7	4.4438E7				1.5666E7	5.4798E6	5.2926E6			7	F7:6565	3849_02.raw	22	2	2	2	1
2	1	P08123|CO1A2_HUMAN	R.GEVGLP(+15.99)GLSGPVGPP(+15.99)GNPGANGLTGAK.G	Y	66.77	2401.2236	27	3.7	801.4181	3	45.10	4.7647E6	3.969E6	5.2379E6			2.2698E6	2.1488E6	2.0256E6		0	0											0						5.8751E6			22	F22:15193	5289_03_r.raw	7	1	1	1	0
2	1	P08123|CO1A2_HUMAN	R.GSDGSVGPVGPAGPIGSAGPP(+15.99)GFPGAPGP(+15.99)K(+178.05)GEIGAVGNAGPAGPAGPR.G	Y	66.77	4279.0781	48	2.6	1070.7795	4	45.55				7.7417E7																		5.5537E6				4.8107E7					26	F26:15168	6401_01.raw	3	0	0	0	1
2	1	P08123|CO1A2_HUMAN	K.GEP(+15.99)GVVGAVGTAGP(+15.99)SGPSGLP(+15.99)GER.G	Y	66.69	2152.0396	24	0.3	1077.0273	2	31.35	1.7042E7		3.3599E6		2.6133E6	5.4639E6	1.8418E6														1.0059E7					7.701E6					3	F3:10330	3399_03.raw	10	2	0	1	0
2	1	P08123|CO1A2_HUMAN	P.AGPNGFAGPAGAAGQP(+15.99)GAK.G	Y	66.66	1610.7800	19	-0.8	806.3966	2	24.13						1.5527E7	1.534E7	1.1378E7																		2.8621E6	3.5972E6	3.2728E6	1.5356E6	9.5745E5	7	F7:7384	3849_02.raw	10	0	0	0	0
2	1	P08123|CO1A2_HUMAN	V.GAAGAP(+15.99)GPHGPVGPAGK.H	Y	66.29	1412.7159	17	-0.9	707.3646	2	15.87					6.3148E6	1.9193E8	1.8363E8	1.6613E8	8.115E6	8.4693E6	1.0499E7				7.1624E6	7.7546E6	7.4328E6														7	F7:4143	3849_02.raw	13	0	0	0	0
2	1	P08123|CO1A2_HUMAN	R.GLHGEFGLP(+15.99)GP(+15.99)AGPR.G	Y	66.12	1492.7422	15	1.5	747.3795	2	31.60	2.4637E8	2.6863E8	2.5543E8	2.117E8	1.7164E8	2.0361E8	1.748E8	1.7881E8	1.7155E8	1.9258E8	1.927E8	3.5708E7	3.4808E7	3.4369E7	3.944E7	3.5547E7	3.7046E7	3.1617E7	3.699E7	3.6428E7	1.953E8	2.787E8	2.8577E7	2.9012E7	2.8646E7	1.9062E8	1.6328E8	1.7513E8	1.212E7	1.392E7	7	F7:10295	3849_02.raw	53	1	2	1	2
2	1	P08123|CO1A2_HUMAN	K.GEIGAVGNAGPAGPAGPR.G	Y	66.10	1546.7852	18	1.4	774.4009	2	26.11	0	0	0	0	2.5159E7	0	2.191E8	0	0	0	9.7473E7	6.3469E7	0	7.0629E7				4.7068E7	1.1891E8	4.3738E7	0	0	0	0	2.4229E7	0	4.7803E8	0			24	F24:7944	6313_02.raw	12	0	0	0	0
2	1	P08123|CO1A2_HUMAN	R.GIP(+15.99)GPVGAAGATGAR.G	Y	65.94	1266.6680	15	2.2	634.3427	2	23.87	2.0389E9	2.0124E9	2.2383E9	1.2627E9	1.3675E9	1.0636E9	9.8802E8	1.019E9	1.1842E9	1.2101E9	1.2499E9	2.3355E8	2.2114E8	1.9117E8	1.658E8	1.6338E8	1.6504E8	2.2832E8	2.3727E8	2.3836E8	1.3752E9	1.9246E9	2.5584E8	2.3411E8	2.296E8	1.0851E9	1.0524E9	9.9759E8	6.7609E7	6.5017E7	11	F11:7533	4312_03.raw	53	2	3	3	3
2	1	P08123|CO1A2_HUMAN	R.GSDGSVGPVGPAGPIGSAGP(+15.99)PGFP(+15.99)GAP(+15.99)GP(+15.99)K.G	Y	65.75	2604.2454	30	1.2	869.0901	3	41.28	9.0861E7	8.9656E7	8.8348E7		2.9191E7																										1	F1:13984	3399_01.raw	4	1	1	1	0
2	1	P08123|CO1A2_HUMAN	P.SGEAGTAGP(+15.99)PGTP(+15.99)GPQGLLGAP(+15.99)GILGLP(+15.99)GSR.G	Y	65.63	2802.4146	31	2.3	935.1476	3	54.50	9.9191E5	0		9.0006E6	9.768E6	2.0446E7	1.8311E7	1.814E7	2.7561E6	2.7876E6								1.0854E6			4.239E6	6.3581E6				5.376E6	5.8857E6	5.7176E6	2.8824E6	4.0354E6	29	F29:17911	6474_01.raw	18	1	0	0	1
2	1	P08123|CO1A2_HUMAN	R.GSDGSVGPVGPAGPIGSAGP(+15.99)P(+15.99)GFP(+15.99)GAP(+15.99)GPK.G	Y	65.55	2604.2454	30	3.0	869.0917	3	42.69	2.6122E6	1.3401E6	1.2626E6	0		3.7219E7	3.9168E7											0										2.9787E7			6	F6:14239	3849_01.raw	6	1	1	1	0
2	1	P08123|CO1A2_HUMAN	R.GLP(+15.99)GVAGAVGEPGPLGIAGPP(+15.99)GAR.G	Y	65.51	2098.1169	24	0.9	1050.0667	2	47.94	1.8232E7	1.7408E7	1.6434E7	6.6561E6	9.8541E6				7.3067E6	7.6476E6	5.5584E6										6.8566E6	8.2095E6									2	F2:16069	3399_02.raw	18	2	2	2	1
2	1	P08123|CO1A2_HUMAN	G.EQGP(+15.99)P(+15.99)GPP(+15.99)GFQGLP(+15.99)GPSGPAGEVGKP(+15.99)GER.G	Y	65.40	2832.3313	29	0.4	945.1180	3	35.60	6.2598E7	5.8075E7	6.3478E7						4.9731E7	0	0	0	0	0									5.9293E6	0	5.9906E6						2	F2:11801	3399_02.raw	6	1	1	1	0
2	1	P08123|CO1A2_HUMAN	K.GAAGLP(+15.99)GVAGAP(+15.99)GLP(+15.99)GPR.G	Y	65.15	1561.8212	18	1.3	781.9189	2	35.68	7.1864E8	6.7146E8	7.3845E8	4.4647E8	4.6389E8	4.8475E8	4.431E8	4.4549E8	4.1268E8	4.4177E8	4.6202E8	9.8676E7	9.9761E7	8.6869E7	6.6467E7	6.6099E7	6.2956E7	9.1203E7	1.0597E8	1.028E8	5.1292E8	6.8856E8	8.5855E7	8.1485E7	8.1767E7	3.9177E8	4.0288E8	3.6734E8	2.4633E7	2.5476E7	7	F7:11613	3849_02.raw	46	2	2	2	2
2	1	P08123|CO1A2_HUMAN	P.AGPNGFAGPAGAAGQP(+15.99)GAK(+15.99).G	Y	65.03	1626.7749	19	-0.8	814.3940	2	23.83				6.2735E6	5.2125E6	0	0	1.6836E7																		5.8272E6	5.9409E6	5.8921E6	1.1383E6		7	F7:7335	3849_02.raw	7	0	0	0	1
2	1	P08123|CO1A2_HUMAN	R.GAP(+15.99)GAVGAP(+15.99)GPAGATGDR.G	Y	64.96	1509.7170	18	-0.4	755.8655	2	17.20	4.0641E8	3.8421E8	4.3961E8	3.2196E8	3.3187E8	3.8418E8	3.3749E8	3.2714E8	3.1313E8	3.2161E8	3.3375E8	1.1481E8	7.8778E7	7.9496E7	7.0283E7	0	0	7.6401E7	9.2856E7	9.4019E7	1.7945E8	2.8354E8	4.161E7	3.63E7	3.4168E7	2.1023E8	2.4858E8	2.2952E8	0	0	7	F7:4703	3849_02.raw	42	2	2	2	2
2	1	P08123|CO1A2_HUMAN	K.GEP(+15.99)GSAGPQGP(+15.99)P(+15.99)GPSGEEGK.R	Y	64.55	1838.7917	20	0.5	920.4036	2	14.52	9.3198E6	8.352E6	1.0043E7	5.7555E6	3.7631E6	8.0195E6	1.1182E7	1.0586E7	9.0331E6	9.6137E6	9.3621E6	3.2671E6	2.9482E6	3.1058E6	2.8584E6	2.918E6	2.6157E6	2.2835E6	2.5051E6	2.6139E6	4.9151E6	6.5603E6	1.0767E6	1.2087E6	9.3411E5	4.9892E6	5.1564E6	4.5985E6		8.1339E5	26	F26:3688	6401_01.raw	29	1	1	1	1
2	1	P08123|CO1A2_HUMAN	K.RGPN(+.98)GEAGSAGPP(+15.99)GPP(+15.99)GLR.G	Y	64.31	1775.8550	19	-2.6	592.9574	3	21.84	1.5804E8	1.5916E8	1.4858E8	5.2791E7	5.2705E7	7.4731E7	7.698E7	7.6217E7	7.3916E7	7.4175E7	7.9674E7	7.8597E6	8.6907E6	8.751E6							1.0443E8	1.4363E8	1.536E7	1.3729E7	1.232E7	5.5265E7	5.7445E7	5.4684E7			7	F7:6573	3849_02.raw	24	1	2	1	1
2	1	P08123|CO1A2_HUMAN	R.GPSGPPGP(+15.99)DGNKGEP(+15.99)GVVGAVGTAGPSGPSGLP(+15.99)GER.G	Y	64.29	3212.5332	36	-0.9	804.1399	4	32.44																								5.7838E6							24	F24:10159	6313_02.raw	1	0	0	0	0
2	1	P08123|CO1A2_HUMAN	R.GLHGEFGLPGP(+15.99)AGPR.G	Y	64.28	1476.7473	15	0.1	739.3810	2	34.86	1.1661E8					6.0583E7	6.7572E7	6.1586E7	6.2491E7	0	0	6.6071E6		0		0	0	1.1879E7								6.2851E7	5.3965E7	0			7	F7:11486	3849_02.raw	9	1	0	0	0
2	1	P08123|CO1A2_HUMAN	K.GEP(+15.99)GAP(+15.99)GENGTPGQTGAR.G	Y	64.24	1683.7448	18	0.9	842.8804	2	14.64	0	1.0903E7	1.2793E7	8.4592E6	8.8601E6	9.6307E6	1.0852E7	9.3047E6	1.1025E7	1.1208E7	1.254E7	1.4678E6	1.2423E6	1.6905E6				2.7495E6	2.588E6	2.899E6	8.5038E6	8.5381E6	8.2382E5	7.4168E5	7.4299E5	8.6998E6	7.9129E6	6.4019E6			7	F7:3669	3849_02.raw	30	0	1	1	1
2	1	P08123|CO1A2_HUMAN	K.GPSGEAGTAGPP(+15.99)GTP(+15.99)GP(+15.99)QGLLGAP(+15.99)GILGLP(+15.99)GSR.G	Y	64.24	2972.4836	33	9.4	991.8445	3	56.27					0			0								0													0	0	8	F8:18578	3849_03.raw	0	0	0	0	0
2	1	P08123|CO1A2_HUMAN	K.GHN(+.98)GLQGLP(+15.99)GIAGHHGDQGAP(+15.99)GSVGPAGPR.G	Y	64.22	2800.3389	30	-0.3	701.0918	4	29.59	7.4368E6	0	7.6457E6	1.2576E7	9.8408E6	0	0	0	8.4632E6	0	1.5174E7										1.3457E7	0				0	9.6175E6	9.4227E6			26	F26:9441	6401_01.raw	11	1	0	1	1
2	1	P08123|CO1A2_HUMAN	R.TGHP(+15.99)GTVGPAGIR.G	Y	63.97	1234.6418	13	1.1	618.3289	2	18.27	6.6353E8	6.0953E8	6.6964E8	5.2841E8	5.5087E8	4.9624E8	5.0006E8	4.5302E8	4.53E8	3.8426E8	4.9056E8	7.5789E7	7.235E7	6.0283E7	5.4483E7	4.8791E7	3.9012E7	8.1253E7	8.4588E7	8.9789E7	4.6296E8	6.5354E8	3.5311E7	3.3999E7	3.3534E7	4.3832E8	4.4807E8	4.3307E8	2.1712E7	2.1477E7	7	F7:5125	3849_02.raw	60	2	2	2	2
2	1	P08123|CO1A2_HUMAN	R.GLP(+15.99)GVAGAVGEP(+15.99)GPLGIAGP(+15.99)P(+15.99)GAR.G	Y	63.93	2130.1067	24	5.2	1066.0662	2	44.51	1.6706E7	1.2818E7	1.5116E7	3.3024E6	5.2717E6	6.534E6	4.6413E6	2.8395E6	8.6478E6	5.1486E6	8.0334E6										1.0184E7	1.4472E7	1.153E6	1.0768E6		3.0595E6	3.1908E6	3.4596E6			2	F2:14931	3399_02.raw	27	2	2	2	1
2	1	P08123|CO1A2_HUMAN	K.EGPVGLP(+15.99)GIDGRP(+15.99)GPIGPAGAR.G	Y	63.91	2071.0808	22	3.1	691.3697	3	38.92	5.4332E7	1.2669E9	0	2.0378E7	1.9229E7	5.4056E8	5.1926E8	5.1252E8	0	0	0										1.0306E9	1.3765E9				0	6.3868E8	1.6482E7			2	F2:12969	3399_02.raw	21	1	2	0	1
2	1	P08123|CO1A2_HUMAN	R.GEVGPAGPNGFAGP(+15.99)AGAAGQP(+15.99)GAK.G	Y	63.89	2065.9817	24	2.3	1034.0005	2	29.82	3.2625E8	2.8454E8	3.1294E8	1.9328E8	1.863E8	1.7514E8	1.6089E8	1.6047E8	1.5163E8	1.6226E8	1.541E8	2.7097E7	2.8833E7	2.4018E7	8.2887E6	8.6809E6	1.0082E7	3.2199E7	3.116E7	3.3083E7	1.6802E8	2.4169E8	2.9406E7	2.7856E7	2.7248E7	1.527E8	1.5824E8	1.5118E8			24	F24:9331	6313_02.raw	53	2	2	2	2
2	1	P08123|CO1A2_HUMAN	R.GPSGP(+15.99)P(+15.99)GP(+15.99)DGNKGEP(+15.99)GVVGAVGTAGPSGPSGLP(+15.99)GER.G	Y	63.83	3244.5229	36	1.8	1082.5168	3	31.48			5.671E6	4.4897E6																		8.2497E6									4	F4:10279	3484_02.raw	3	0	0	1	1
2	1	P08123|CO1A2_HUMAN	K.GEQGP(+15.99)P(+15.99)GP(+15.99)PGFQGLP(+15.99)GPSGPAGEVGKP(+15.99)GER.G	Y	63.82	2889.3528	30	-0.5	723.3451	4	35.26		3.2333E7	5.5279E6				7.1015E6	9.1912E7							6.604E6	5.3524E6	5.1336E6	1.9525E7					0				4.4794E7				7	F7:11568	3849_02.raw	10	0	1	1	0
2	1	P08123|CO1A2_HUMAN	R.TGP(+15.99)P(+15.99)GPSGISGP(+15.99)P(+15.99)GPP(+15.99)GPAGK.E	Y	63.61	1860.8853	21	-0.6	931.4493	2	20.92												5.7398E6			5.8612E6				1.0352E7		2.7354E7	3.6276E7									22	F22:6149	5289_03_r.raw	5	0	0	0	0
2	1	P08123|CO1A2_HUMAN	R.TGEVGAVGPP(+15.99)GFAGEK.G	Y	62.91	1487.7256	16	2.0	744.8716	2	29.82	8.496E8	7.6069E8	8.2995E8	6.5001E8	6.0754E8	5.8355E8	5.9171E8	5.6838E8	6.6146E8	6.8487E8	6.6537E8	1.009E8	1.0794E8	8.963E7	8.5086E7	8.021E7	8.245E7	1.1223E8	1.2254E8	1.2217E8	5.4558E8	7.7654E8	5.3561E7	4.9949E7	5.1663E7	4.4404E8	4.6273E8	4.1946E8	3.0672E7	3.3163E7	24	F24:9344	6313_02.raw	41	2	3	1	2
2	1	P08123|CO1A2_HUMAN	R.GP(+15.99)SGP(+15.99)P(+15.99)GPDGNKGEP(+15.99)GVVGAVGTAGPSGPSGLP(+15.99)GER.G	Y	62.86	3244.5229	36	-0.5	1082.5144	3	31.61																										4.2888E6					26	F26:10203	6401_01.raw	1	0	0	0	0
2	1	P08123|CO1A2_HUMAN	R.GAPGP(+15.99)DGNN(+.98)GAQGPP(+15.99)GPQGVQGGK.G	Y	62.75	2145.9675	24	0.2	1073.9912	2	17.65			3.8473E7	1.6617E7	1.7505E7	1.8783E7	2.8333E7	2.459E7		0	2.0637E7									1.0211E7	1.9233E7	2.2618E7					1.7245E7			2.6282E6	3	F3:5137	3399_03.raw	12	0	0	1	1
2	1	P08123|CO1A2_HUMAN	R.GAP(+15.99)GAVGAP(+15.99)GPAGATGDRGEAGAAGPAGPAGP(+15.99)R.G	Y	62.61	2742.3069	33	0.7	915.1102	3	20.36	4.7565E7		4.3146E7	1.7475E7		2.4312E7		2.8199E7			1.6301E7									4.5579E6				6.5026E6			2.085E7	2.0887E7			1	F1:6143	3399_01.raw	10	1	0	1	1
2	1	P08123|CO1A2_HUMAN	R.GSDGSVGPVGPAGPIGSAGPP(+15.99)GFPGAP(+15.99)GPK(+340.10)GEIGAVGNAGPAGPAGPR.G	Y	62.60	4441.1309	48	-0.1	1111.2899	4	45.05				6.7911E6	6.4547E6		4.0992E6	4.2164E6	8.4729E6	7.7737E6	6.9256E6										1.1885E7										10	F10:15222	4312_02.raw	8	0	0	0	1
2	1	P08123|CO1A2_HUMAN	R.GSDGSVGPVGPAGPIGSAGP(+15.99)P(+15.99)GFPGAP(+15.99)GP(+15.99)K.G	Y	62.57	2604.2454	30	1.2	869.0901	3	41.28	9.0861E7														0				0												1	F1:14073	3399_01.raw	1	1	0	0	0
2	1	P08123|CO1A2_HUMAN	R.GPNGEAGSAGPP(+15.99)GP(+15.99)PGLR.G	Y	62.55	1618.7699	18	1.6	810.3936	2	22.51									2.9709E7		3.6752E7				3.9881E7			5.8615E7													18	F18:6491	4484_01.raw	4	0	0	0	0
2	1	P08123|CO1A2_HUMAN	R.GHNGLDGLK(+15.99)GQP(+15.99)GAP(+15.99)GVK.G	Y	62.46	1748.8805	18	1.2	438.2279	4	18.44	9.7778E6	8.02E6	8.8389E6	1.2338E7	1.4768E7	1.3329E7	2.1815E7	2.171E7													7.7117E6	1.5855E7				5.4742E6	1.1972E7	1.512E7			2	F2:5319	3399_02.raw	20	1	1	1	2
2	1	P08123|CO1A2_HUMAN	P.AGPN(+.98)GFAGPAGAAGQP(+15.99)GAK.G	Y	62.46	1611.7640	19	-2.8	806.8870	2	25.79						2.5808E6	0	3.978E6																							7	F7:8099	3849_02.raw	2	0	0	0	0
2	1	P08123|CO1A2_HUMAN	R.TGEVGAVGP(+15.99)P(+15.99)GFAGEKGPSGEAGTAGP(+15.99)PGTPGPQGLLGAP(+15.99)GILGLP(+15.99)GSR.G	Y	62.43	4426.2036	49	2.7	1107.5612	4	55.80										0																					10	F10:18836	4312_02.raw	0	0	0	0	0
2	1	P08123|CO1A2_HUMAN	K.GENGVVGPTGPVGAAGPAGPN(+.98)GP(+15.99)P(+15.99)GPAGSR.G	Y	62.43	2583.2312	30	4.3	862.0880	3	31.44		1.0463E7				1.1008E7	0															1.6948E7									2	F2:10229	3399_02.raw	3	0	1	0	0
2	1	P08123|CO1A2_HUMAN	R.TGEVGAVGP(+15.99)P(+15.99)GFAGEKGPSGEAGTAGPPGTP(+15.99)GPQGLLGAP(+15.99)GILGLP(+15.99)GSR.G	Y	62.42	4426.2036	49	-0.2	1476.4082	3	55.19															0			0								4.6528E7		0			28	F28:18368	6401_03.raw	1	0	0	0	0
2	1	P08123|CO1A2_HUMAN	K.GEIGAVGNAGP(+15.99)AGPAGPR.G	Y	62.28	1562.7800	18	3.5	782.4000	2	24.80	0	0	0	0	0				0	0	0	1.7117E6	0	0			0	0	0	0	0	0			0	0	0				13	F13:7511	4371_02.raw	1	0	0	0	0
2	1	P08123|CO1A2_HUMAN	K.GPK(+178.05)GENGVVGPTGPVGAAGPAGPNGPP(+15.99)GPAGSR.G	Y	62.17	3026.4692	33	2.2	1009.8326	3	28.39		6.963E6	7.6571E6	5.509E6			4.4881E6		4.9183E6																			3.9205E6			2	F2:9158	3399_02.raw	6	0	1	1	1
2	1	P08123|CO1A2_HUMAN	R.GSDGSVGPVGPAGPIGSAGP(+15.99)PGFPGAP(+15.99)GP(+15.99)K.G	Y	62.14	2588.2505	30	0.2	863.7576	3	43.55				0						0	0																				11	F11:14786	4312_03.raw	0	0	0	0	0
2	1	P08123|CO1A2_HUMAN	K.GEP(+15.99)GAP(+15.99)GENGTP(+15.99)GQTGAR.G	Y	62.09	1699.7396	18	1.7	850.8785	2	13.72	4.3262E7	4.5199E7	4.8926E7	3.9259E7	2.7383E7	4.8228E7	4.9922E7	4.4289E7	4.0101E7	4.0196E7	4.4223E7	9.607E6	9.5801E6	1.1424E7	8.8825E6	8.2616E6	7.6974E6	1.1757E7	1.249E7	1.2658E7	1.989E7	2.7302E7	5.0618E6	4.5762E6	4.4093E6	2.8702E7	3.2439E7	2.6623E7	2.5274E6	1.9963E6	7	F7:3298	3849_02.raw	30	1	1	1	1
2	1	P08123|CO1A2_HUMAN	R.GEAGAAGPAGPAGPR.G	Y	61.97	1234.6053	15	1.2	618.3107	2	15.92	4.4601E8	4.4146E8	4.821E8	3.5345E8	3.5235E8	3.7645E8	3.6668E8	3.4712E8	4.4615E8	4.5218E8	4.5614E8	1.0608E8	9.8832E7	9.2831E7	7.153E7	6.5628E7	6.5114E7	7.7381E7	8.9048E7	8.1929E7	2.3147E8	3.2464E8	3.9928E7	3.7157E7	3.6197E7	2.2389E8	2.4176E8	2.2312E8	7.0452E6	6.5815E6	11	F11:4205	4312_03.raw	38	1	1	2	1
2	1	P08123|CO1A2_HUMAN	K.GPSGEAGTAGP(+15.99)PGTPGPQGLLGAP(+15.99)GILGLP(+15.99)GSR.G	Y	61.39	2940.4939	33	2.6	981.1744	3	56.82						2.0975E6	1.5831E6		0																						6	F6:18934	3849_01.raw	2	0	0	0	0
2	1	P08123|CO1A2_HUMAN	K.GEQGP(+15.99)P(+15.99)GP(+15.99)P(+15.99)GFQGLP(+15.99)GPSGPAGEVGKP(+15.99)GER.G	Y	61.30	2905.3477	30	2.9	969.4593	3	32.97						9.2669E6	1.056E7	7.6104E6																							7	F7:10741	3849_02.raw	3	0	0	0	0
2	1	P08123|CO1A2_HUMAN	R.GAP(+15.99)GAVGAP(+15.99)GPAGATGDRGEAGAAGP.A	Y	60.98	2119.9880	26	-2.1	1060.9990	2	22.74				2.6587E8	1.7344E7	6.0765E7	5.4171E7	9.7082E7													2.2015E8	1.0937E7				3.3499E7	3.2227E7	3.0464E7	9.5498E6	1.2269E7	7	F7:6935	3849_02.raw	22	0	0	0	2
2	1	P08123|CO1A2_HUMAN	R.GSDGSVGPVGPAGPIGSAGPP(+15.99)GFP(+15.99)GAPGPK(+178.05)GEIGAVGNAGPAGPAGPR.G	Y	60.93	4279.0781	48	1.2	1070.7781	4	46.69								4.1482E7												4.7368E6											8	F8:15426	3849_03.raw	2	0	0	0	0
2	1	P08123|CO1A2_HUMAN	K.GEQGP(+15.99)PGP(+15.99)PGFQGLP(+15.99)GPSGPAGEVGKP(+15.99)GER.G	Y	60.89	2873.3579	30	2.6	719.3486	4	34.75	5.8737E7				8.8824E7		0																								1	F1:11687	3399_01.raw	2	1	0	0	0
2	1	P08123|CO1A2_HUMAN	K.RGPN(+.98)GEAGSAGP(+15.99)PGPP(+15.99)GLR.G	Y	60.72	1775.8550	19	-0.2	888.9346	2	21.84			1.1501E7				6.5867E6																								7	F7:6525	3849_02.raw	2	0	0	1	0
2	1	P08123|CO1A2_HUMAN	R.GSDGSVGPVGPAGPIGSAGPP(+15.99)GFPGAPGP(+15.99)K(+340.10)GEIGAVGNAGPAGPAGPR.G	Y	60.67	4441.1309	48	1.4	1111.2915	4	44.98																										0	5.4637E6	5.2321E6			27	F27:14983	6401_02.raw	2	0	0	0	0
2	1	P08123|CO1A2_HUMAN	K.RGPN(+.98)GEAGSAGPP(+15.99)GP(+15.99)PGLR.G	Y	60.66	1775.8550	19	-1.0	888.9338	2	20.51	1.0427E7	8.8437E6	1.1501E7			4.9862E6						7.8597E6					5.7375E6	9.5749E6	1.0717E7	9.7031E6	1.0822E8										1	F1:6105	3399_01.raw	11	1	1	1	0
2	1	P08123|CO1A2_HUMAN	R.GSDGSVGPVGPAGPIGSAGP(+15.99)PGFP(+15.99)GAPGPK(+340.10)GEIGAVGNAGPAGPAGPR.G	Y	60.11	4441.1309	48	2.2	1111.2925	4	44.88		3.5953E6						4.2164E6														1.3415E7									2	F2:15083	3399_02.raw	3	0	1	0	0
2	1	P08123|CO1A2_HUMAN	K.GEPGVVGAVGTAGPSGPSGLP(+15.99)GER.G	Y	60.08	2120.0498	24	-0.3	707.6903	3	35.56	9.9085E6		8.917E6	6.9958E6	6.8843E6				1.8942E6																						4	F4:11799	3484_02.raw	5	1	0	1	1
2	1	P08123|CO1A2_HUMAN	V.VGPTGPVGAAGPAGPNGPP(+15.99)GPAGSR.G	Y	59.98	2110.0554	25	4.8	704.3624	3	28.78						7.0692E6	6.3291E6	5.6371E6																							7	F7:9168	3849_02.raw	3	0	0	0	0
2	1	P08123|CO1A2_HUMAN	V.GAP(+15.99)GPAGATGDRGEAGAAGPAGPAGPR.G	Y	59.96	2258.0786	27	2.0	753.7017	3	20.20						9.7593E6	9.5456E6																								7	F7:5913	3849_02.raw	2	0	0	0	0
2	1	P08123|CO1A2_HUMAN	K.GEPGVVGAVGTAGPSGPSGLPGER.G	Y	59.80	2104.0549	24	1.9	702.3602	3	38.03		5.1274E6	4.4821E6																												2	F2:12775	3399_02.raw	3	0	2	1	0
2	1	P08123|CO1A2_HUMAN	R.GDGGP(+15.99)P(+15.99)GMTGFP(+15.99)GAAGR.T	Y	59.79	1548.6626	17	0.9	775.3392	2	20.94	4.9576E8	4.6431E8	4.7655E8	3.094E8	2.9267E8	4.0576E8	4.2902E8	4.0809E8	3.037E8	2.9962E8	3.1914E8	6.4594E7	6.8282E7	6.5149E7	4.6907E7	4.4715E7	4.4272E7	7.7774E7	8.1821E7	8.077E7	3.1771E8	4.4774E8	4.0164E7	3.7266E7	3.7169E7	2.4989E8	2.4782E8	2.3444E8	1.6322E7	1.5753E7	24	F24:5876	6313_02.raw	40	2	2	1	2
2	1	P08123|CO1A2_HUMAN	K.GEIGAVGN(+.98)AGPAGP(+15.99)AGPR.G	Y	59.76	1563.7640	18	4.6	782.8929	2	26.43							0														0	4.9084E6									7	F7:8341	3849_02.raw	1	0	0	0	0
2	1	P08123|CO1A2_HUMAN	R.GPP(+15.99)GAVGSP(+15.99)GVNGAP(+15.99)GEAGRDGNP(+15.99)GNDGP(+15.99)PGR.D	Y	59.68	2916.2981	32	3.1	973.1097	3	18.07						1.1441E7		1.0657E7													1.2166E7		3.7799E6		2.7133E6	8.5696E6	8.2487E6	6.4021E6			8	F8:5107	3849_03.raw	8	0	0	0	0
2	1	P08123|CO1A2_HUMAN	R.GEVGPAGPNGFAGPAGAAGQP(+15.99)GAK(+15.99).G	Y	59.64	2065.9817	24	0.6	1033.9988	2	31.15			1.8926E8			9.7279E7									1.0213E7		1.0082E7														17	F17:10360	4406_03.raw	4	0	0	1	0
2	1	P08123|CO1A2_HUMAN	R.GERGP(+15.99)PGESGAAGPTGPIGSR.G	Y	59.64	1921.9241	21	2.9	641.6505	3	20.74	1.9697E8				4.8606E7												3.3896E6				1.1265E8									2.9901E6	17	F17:6129	4406_03.raw	5	1	0	0	0
2	1	P08123|CO1A2_HUMAN	K.GPTGDP(+15.99)GKN(+.98)GDKGHAGLAGAR.G	Y	59.51	1948.9351	21	2.0	488.2420	4	13.56	2.06E6	2.5541E6	4.6604E5																		7.2897E5	1.7845E6				1.2568E6	1.6173E6	1.3491E6			28	F28:3374	6401_03.raw	11	2	2	1	0
2	1	P08123|CO1A2_HUMAN	L.P(+15.99)GIDGRP(+15.99)GPIGPAGAR.G	Y	59.44	1518.7902	16	3.3	760.4048	2	40.59							0																								7	F7:13415	3849_02.raw	0	0	0	0	0
2	1	P08123|CO1A2_HUMAN	R.GLP(+15.99)GVAGAVGEPGPLGIAGP(+15.99)PGAR.G	Y	59.36	2098.1169	24	-1.9	1050.0637	2	47.92	4.3759E6			2.2637E6							2.4258E6																				1	F1:16219	3399_01.raw	3	1	0	0	1
2	1	P08123|CO1A2_HUMAN	R.GAPGP(+15.99)DGNNGAQGPP(+15.99)GPQGV.Q	Y	59.32	1774.7870	20	-2.4	888.3987	2	24.56						5.442E7	4.087E7	4.4865E7																							7	F7:7527	3849_02.raw	4	0	0	0	0
2	1	P08123|CO1A2_HUMAN	R.GAP(+15.99)GAVGAPGP(+15.99)AGATGDRGEAGAAGPAGPAGP(+15.99)R.G	Y	59.23	2742.3069	33	2.7	915.1121	3	20.37					1.7094E7									5.1447E6																	5	F5:6067	3484_03_r.raw	2	0	0	0	0
2	1	P08123|CO1A2_HUMAN	R.TGEVGAVGP(+15.99)P(+15.99)GFAGEK.G	Y	59.02	1503.7205	16	0.1	752.8676	2	25.78	2.4468E7	2.1393E7	2.3282E7	2.8703E7	2.6891E7	2.482E7	2.4016E7	2.4221E7	3.0393E7	2.8751E7	2.8588E7	3.8353E6	4.6058E6	4.2986E6	5.2677E6	5.5747E6	5.4617E6	1.8556E6			1.3772E7	2.0345E7				1.4675E7	1.3864E7	1.4205E7	1.3919E6	2.0854E6	2	F2:8230	3399_02.raw	41	2	2	2	2
2	1	P08123|CO1A2_HUMAN	R.GLP(+15.99)GSP(+15.99)GNIGPAGK.E	Y	58.95	1252.6411	14	1.2	627.3286	2	20.68	1.2321E9	1.1534E9	1.2259E9	8.1678E8	8.7638E8	9.6594E8	1.0066E9	9.4995E8	7.5092E8	7.234E8	8.2106E8	1.6128E8	1.7668E8	1.575E8	1.587E8	1.609E8	1.4643E8	1.8049E8	1.942E8	1.9026E8	7.6654E8	1.077E9	1.7942E8	1.6644E8	1.6116E8	6.3453E8	6.6929E8	6.5866E8	5.1443E7	5.4754E7	11	F11:6127	4312_03.raw	30	1	1	1	1
2	1	P08123|CO1A2_HUMAN	A.AGPAGPNGPP(+15.99)GPAGSR.G	Y	58.88	1374.6639	16	-0.2	688.3391	2	16.69	1.6346E7	1.3479E7	1.2951E7	2.1688E7	2.1462E7	5.7874E7	5.6124E7	5.2868E7	3.6398E7	3.4351E7	3.1806E7							4.9057E6		0	4.9716E6	9.2971E6				1.7136E7					7	F7:4544	3849_02.raw	15	1	1	1	1
2	1	P08123|CO1A2_HUMAN	R.TGEVGAVGP(+15.99)PGFAGEKGP(+15.99)SGEAGTAGP(+15.99)P(+15.99)GTP(+15.99)GPQGLLGAP(+15.99)GILGLP(+15.99)GSR.G	Y	58.66	4458.1938	49	6.6	1115.5631	4	54.86							0														0										7	F7:18187	3849_02.raw	0	0	0	0	0
2	1	P08123|CO1A2_HUMAN	R.GEAGAAGP(+15.99)AGPAGPR.G	Y	58.57	1250.6002	15	-2.2	626.3060	2	15.02		2.248E7			1.6384E7	1.5215E7	1.7634E7	1.4084E7	1.3819E7	1.386E7		3.9557E6	3.9196E6	3.8529E6	4.5356E6	4.28E6	4.2677E6	3.0531E6	4.2021E6	3.2283E6			1.4604E6	1.9631E6	1.4961E6	9.1234E6	1.4249E7	1.3395E7	4.1623E5		7	F7:3789	3849_02.raw	23	0	1	0	0
2	1	P08123|CO1A2_HUMAN	R.GP(+15.99)SGP(+15.99)PGPDGNKGEP(+15.99)GVVGAVGTAGPSGPSGLP(+15.99)GER.G	Y	58.53	3228.5281	36	2.5	1077.1860	3	32.17																					3.5719E7										21	F21:10297	5289_01.raw	1	0	0	0	0
2	1	P08123|CO1A2_HUMAN	R.TGEVGAVGP(+15.99)P(+15.99)GFAGEKGPSGEAGTAGP(+15.99)PGTP(+15.99)GPQGLLGAP(+15.99)GILGLP(+15.99)GSR.G	Y	58.52	4442.1987	49	1.5	1481.7424	3	54.64	1.7398E7							0																							1	F1:18343	3399_01.raw	1	1	0	0	0
2	1	P08123|CO1A2_HUMAN	R.GPPGESGAAGPTGPIGSR.G	Y	58.32	1563.7640	18	1.4	782.8904	2	22.79	4.808E6	4.3772E6	5.2704E6	2.7692E6	2.0953E6																1.9923E6	3.4418E6									1	F1:7071	3399_01.raw	7	1	1	1	1
2	1	P08123|CO1A2_HUMAN	R.GPQGHQGPAGPP(+15.99)GPP(+15.99)GPP(+15.99)GPP(+15.99)GVSGGGYDFGYDGDFY.R	Y	58.27	3572.5181	37	1.3	1191.8481	3	50.08	5.1533E7	4.2404E7	4.515E7	4.808E7	4.7155E7	2.5941E7	2.3609E7	2.4964E7	2.4112E7	2.3536E7	2.3615E7										3.5959E7	3.3467E7				2.1705E7	1.8203E7	1.5739E7			1	F1:16994	3399_01.raw	16	1	1	1	1
2	1	P08123|CO1A2_HUMAN	F.QGPAGEP(+15.99)GEP(+15.99)GQTGPAGAR.G	Y	58.13	1764.8026	19	1.8	883.4102	2	15.60						5.7519E6	7.0774E6	6.7304E6																							6	F6:4082	3849_01.raw	3	0	0	0	0
2	1	P08123|CO1A2_HUMAN	K.RGPNGEAGSAGP(+15.99)PGPP(+15.99)GLR.G	Y	57.96	1774.8710	19	0.1	888.4428	2	20.74				1.108E7			2.76E7																								7	F7:5996	3849_02.raw	2	0	0	0	1
2	1	P08123|CO1A2_HUMAN	A.AGPAGPN(+.98)GPP(+15.99)GPAGSR.G	Y	57.90	1375.6479	16	0.3	688.8315	2	16.58			1.1234E6	1.5426E6	2.1252E6	6.7766E6	7.1766E6	6.7951E6	4.5088E6	4.6421E6	5.5578E6															2.592E6					9	F9:4518	4312_01.raw	10	0	0	1	1
2	1	P08123|CO1A2_HUMAN	E.AGTAGPP(+15.99)GTPGP(+15.99)QGLLGAP(+15.99)GILGLP(+15.99)GSR.G	Y	57.76	2529.3186	28	-1.8	1265.6643	2	55.49								1.9202E6																							8	F8:18288	3849_03.raw	1	0	0	0	0
2	1	P08123|CO1A2_HUMAN	K.GEP(+15.99)GVVGAVGTAGPSGPSGLP(+15.99)GERG.A	Y	57.63	2193.0662	25	3.3	1097.5439	2	33.61	1.598E8	1.4295E8	1.5326E8	8.5338E7	7.6654E7	4.8353E7	4.2792E7	4.8807E7	1.3971E8	1.4447E8	1.4622E8	2.0616E7	2.6281E7	6.1349E6							7.4921E7	1.0318E8	3.1001E7	3.1189E7	2.9926E7	4.7926E7	5.9394E7	4.7887E7			2	F2:11007	3399_02.raw	40	2	2	2	2
2	1	P08123|CO1A2_HUMAN	E.PGS(+203.08)AGPQGPPGPSGEEGK.R	Y	57.59	1807.8224	18	-7.9	904.9113	2	17.42						0															1.5531E6										6	F6:4820	3849_01.raw	1	0	0	0	0
2	1	P08123|CO1A2_HUMAN	R.GAP(+15.99)GAVGAP(+15.99)GPAGATGDRGEAGAAGP(+15.99)AGP(+15.99)AGPR.G	Y	57.49	2758.3018	33	2.0	920.4430	3	18.58	4.3429E6						2.3623E6	2.5268E6														0									1	F1:5412	3399_01.raw	3	1	0	0	0
2	1	P08123|CO1A2_HUMAN	R.GPPGAVGSP(+15.99)GVNGAP(+15.99)GEAGR.D	Y	57.44	1734.8284	20	2.3	868.4235	2	18.35	1.6306E7	1.4379E7	1.5238E7	6.134E6						4.0102E6											6.2667E6	1.0305E7				5.4354E6	5.3765E6	5.2289E6			3	F3:5265	3399_03.raw	10	1	1	1	1
2	1	P08123|CO1A2_HUMAN	K.GEQGPP(+15.99)GP(+15.99)PGFQGLP(+15.99)GPSGPAGEVGK.P	Y	57.33	2418.1450	26	-0.8	1210.0789	2	38.56							3.5683E7																					3.0646E6			28	F28:12730	6401_03.raw	3	0	0	0	0
2	1	P08123|CO1A2_HUMAN	R.GLP(+15.99)GSP(+15.99)GN(+.98)IGPAGK.E	Y	57.21	1253.6251	14	-1.8	627.8187	2	22.74	4.1467E8	3.9187E8	4.6127E8	2.2181E8	2.501E8	3.0342E8	2.5384E8	2.4385E8	2.3154E8	2.3699E8	2.4741E8	4.2112E7	4.9215E7	3.9983E7	3.1366E7	2.9368E7	3.0493E7	3.7359E7	4.1293E7	4.2652E7	3.2487E8	4.724E8	3.9438E7	3.5963E7	3.4045E7	2.1768E8	2.2538E8	2.0136E8	1.1782E7	1.297E7	7	F7:6994	3849_02.raw	31	1	1	1	1
2	1	P08123|CO1A2_HUMAN	K.GEIGAVGN(+.98)AGP(+15.99)AGPAGPR.G	Y	57.20	1563.7640	18	5.0	782.8932	2	24.60																					3.8047E6	4.9084E6									22	F22:7696	5289_03_r.raw	2	0	0	0	0
2	1	P08123|CO1A2_HUMAN	R.TGEVGAVGPP(+15.99)GFAGEKGP(+15.99)SGEAGTAGPP(+15.99)GTPGP(+15.99)QGLLGAP(+15.99)GILGLP(+15.99)GSR.G	Y	57.13	4442.1987	49	0.6	1111.5576	4	54.64	1.2487E8																														1	F1:18543	3399_01.raw	1	1	0	0	0
2	1	P08123|CO1A2_HUMAN	R.GPP(+15.99)GAAGAP(+15.99)GPQGFQGPAGEP(+15.99)GEP(+15.99)GQTGPAGARG.P	Y	57.00	3015.3706	34	0.2	1006.1310	3	27.72		5.3415E6																					1.5595E7	1.636E7		3.1669E7					24	F24:8547	6313_02.raw	4	0	1	0	0
2	1	P08123|CO1A2_HUMAN	R.GP(+15.99)SGP(+15.99)PGP(+15.99)DGNKGEP(+15.99)GVVGAVGTAGPSGPSGLP(+15.99)GER.G	Y	56.91	3244.5229	36	1.9	1082.5170	3	31.43																					4.6493E6										21	F21:10032	5289_01.raw	1	0	0	0	0
2	1	P08123|CO1A2_HUMAN	K.GEQGP(+15.99)PGPP(+15.99)GFQGLP(+15.99)GPSGPAGEVGKPGER.G	Y	56.84	2857.3630	30	-0.1	953.4615	3	36.14																											2.6522E7				27	F27:11770	6401_02.raw	1	0	0	0	0
2	1	P08123|CO1A2_HUMAN	R.TGPP(+15.99)GP(+15.99)SGISGPP(+15.99)GPP(+15.99)GPAGK.E	Y	56.54	1844.8903	21	-0.4	615.9705	3	23.03		2.6699E8	3.5779E8	1.4866E8				9.3224E7		1.2246E8												2.3931E8	3.4228E7	3.1324E7		1.0566E8	1.1738E8				2	F2:6970	3399_02.raw	10	0	1	1	1
2	1	P08123|CO1A2_HUMAN	R.GEP(+15.99)GNIGFP(+15.99)GPK.G	Y	56.47	1200.5774	12	-0.5	601.2957	2	28.15	7.9631E8	7.2712E8	8.0614E8	5.6891E8	5.5778E8	6.4379E8	6.2149E8	6.0522E8	5.3336E8	5.5916E8	5.4087E8	9.7662E7	9.7683E7	9.7358E7	1.0096E8	9.4642E7	9.4663E7	1.2234E8	1.3213E8	1.3298E8	5.5758E8	7.4404E8	9.3463E7	8.8698E7	8.9712E7	4.4766E8	4.5699E8	4.3903E8		3.6968E7	7	F7:9029	3849_02.raw	30	2	1	1	1
2	1	P08123|CO1A2_HUMAN	A.AGPAGPNGP(+15.99)P(+15.99)GPAGSR.G	Y	56.38	1390.6588	16	-1.4	696.3357	2	15.28						7.2131E6	9.9826E6	9.2999E6	3.6432E6	4.1172E6	4.5802E6		0			2.6387E6															7	F7:3917	3849_02.raw	7	0	0	0	0
2	1	P08123|CO1A2_HUMAN	V.GTAGPSGPSGLP(+15.99)GER.G	Y	56.24	1354.6476	15	-1.5	678.3301	2	21.62						2.3933E7	2.228E7	2.2734E7																							7	F7:6454	3849_02.raw	3	0	0	0	0
2	1	P08123|CO1A2_HUMAN	P.AGPIGSAGPP(+15.99)GFP(+15.99)GAP(+15.99)GPK.G	Y	56.22	1678.8313	19	3.4	840.4258	2	32.30																													1.4826E6		29	F29:10309	6474_01.raw	1	0	0	0	0
2	1	P08123|CO1A2_HUMAN	N.RGET(+365.13)GPSGPVGPAGAVGPR.G	Y	56.16	2083.0181	19	6.9	521.7654	4	21.59	1.7653E7	1.6531E7	1.7526E7		0	0	2.4885E6	0													1.2086E7	4.7982E6	3.1102E6	2.6568E6	2.2126E6	4.007E6	2.4601E6				2	F2:6561	3399_02.raw	15	2	2	2	0
2	1	P08123|CO1A2_HUMAN	R.GP(+15.99)PGAVGSP(+15.99)GVNGAP(+15.99)GEAGR.D	Y	55.95	1750.8234	20	0.9	584.6156	3	16.82	1.8576E8	1.7975E8	2.012E8																		1.1475E8	1.8084E8			1.9382E7	8.6616E7					25	F25:4467	6313_03.raw	7	1	1	1	0
2	1	P08123|CO1A2_HUMAN	I.P(+15.99)GPVGAAGATGAR.G	Y	55.27	1096.5625	13	-2.6	549.2871	2	25.09	4.5225E7	4.1206E7	3.9919E7	2.717E7	2.6685E7	2.2162E7	2.6219E7	2.5884E7	2.2673E7	2.6297E7	2.55E7	4.9313E6	4.9741E6	4.7284E6		2.6153E6	2.6392E6			4.7032E6	2.409E7	3.2346E7	4.884E6	3.545E6	3.5039E6	2.0798E7	2.0245E7	1.8021E7			7	F7:7904	3849_02.raw	32	3	1	2	1
2	1	P08123|CO1A2_HUMAN	E.NGVVGPT(+203.08)GPVGAAGPAGPNGPP(+15.99)GPAGSR.G	Y	55.14	2583.2676	28	7.6	862.1030	3	33.21	4.7494E7	3.7444E7	4.4302E7	3.7286E7	3.2879E7	2.9376E7	3.2194E7	3.3796E7	3.7113E7	3.549E7	4.3009E7	6.8592E6	7.5088E6	8.5897E6				1.2608E7	1.2173E7	1.2771E7	3.2816E7	4.0357E7	3.2263E6	2.9421E6	2.689E6	3.6927E7	3.0465E7	2.3416E7			7	F7:10816	3849_02.raw	25	1	1	1	1
2	1	P08123|CO1A2_HUMAN	P.AGPNGPP(+15.99)GPAGSR.G	Y	55.14	1149.5526	13	0.2	575.7837	2	14.53				1.9191E6	1.8334E6	2.3109E7	2.4207E7	2.0231E7										6.6083E5	5.5163E5	6.9554E5						1.7727E6	2.2075E6	1.5601E6	3.3307E5	2.3992E5	7	F7:3677	3849_02.raw	13	0	0	0	1
2	1	P08123|CO1A2_HUMAN	P.SGEAGTAGPP(+15.99)GTPGP(+15.99)QGLLGAP(+15.99)GILGLP(+15.99)GSR.G	Y	55.12	2802.4146	31	1.2	935.1466	3	54.30									2.7561E6																		5.8857E6				27	F27:18068	6401_02.raw	2	0	0	0	0
2	1	P08123|CO1A2_HUMAN	E.AGAAGPAGPAGPR.G	Y	55.06	1048.5414	13	0.4	525.2782	2	15.08	2.0126E7	1.9274E7	2.0391E7	1.4096E7	1.2054E7	1.1312E7	1.2723E7	1.1198E7	1.391E7	1.2844E7	1.6147E7	4.6978E6	3.4721E6	3.2566E6							6.9384E6	8.5468E6	3.2869E6	3.3295E6	2.8479E6	6.376E6	7.5246E6	8.1183E6			11	F11:3929	4312_03.raw	22	1	1	1	1
2	1	P08123|CO1A2_HUMAN	V.GAVGTAGPSGPSGLP(+15.99)GER.G	Y	55.05	1581.7747	18	-2.4	791.8927	2	25.75						3.4638E7	3.6324E7	3.1374E7	2.5442E6	2.4043E6																					7	F7:8029	3849_02.raw	5	0	0	0	0
2	1	P08123|CO1A2_HUMAN	R.GYP(+15.99)GNIGPVGAAGAP(+15.99)GPHGPVGPAGK(+114.04).H	Y	54.85	2397.1824	26	0.1	800.0681	3	29.50	1.5353E8	1.3591E8	1.51E8	6.6273E7	6.4026E7	5.2577E7	6.0303E7	5.5708E7		1.2521E8	1.2004E8										4.9406E7	6.9444E7				5.0039E7	5.3437E7	4.7662E7			1	F1:9616	3399_01.raw	15	1	1	1	1
2	1	P08123|CO1A2_HUMAN	R.GEP(+15.99)GNIGFP(+15.99)GP(+15.99)KGPTGDP(+15.99)GK.N	Y	54.80	1941.9067	20	1.5	648.3105	3	25.17	0	0	0	0	2.0989E7	1.7992E7	0	1.2893E7	1.4976E7	0											0	0						0			2	F2:7956	3399_02.raw	4	0	0	0	0
2	1	P08123|CO1A2_HUMAN	R.DGNPGNDGP(+15.99)PGR.D	Y	54.70	1167.4905	12	-0.3	584.7523	2	13.09							1.3045E6							1.1717E5																	7	F7:3119	3849_02.raw	2	0	0	0	0
2	1	P08123|CO1A2_HUMAN	R.GPSGPP(+15.99)GPDGN(+.98)K.G	Y	54.62	1095.4832	12	-0.4	548.7487	2	13.78						3.889E6	3.8186E6	3.3677E6				1.1712E6	8.9738E5																		7	F7:3386	3849_02.raw	5	0	0	0	0
2	1	P08123|CO1A2_HUMAN	R.GAP(+15.99)GAVGAPGP(+15.99)AGATGDRGEAGAAGP(+15.99)AGPAGPR.G	Y	54.45	2742.3069	33	0.9	915.1104	3	20.32																						4.072E7	6.8484E6								22	F22:5965	5289_03_r.raw	2	0	0	0	0
2	1	P08123|CO1A2_HUMAN	K.GAAGLP(+15.99)GVAGAP(+15.99)GLPGP(+15.99)R.G	Y	54.41	1561.8212	18	0.5	781.9182	2	35.63						4.5445E8						9.8676E7			6.6467E7	6.6099E7											3.7717E8		2.4633E7		16	F16:12018	4406_02.raw	6	0	0	0	0
2	1	P08123|CO1A2_HUMAN	K.EGPVGLP(+15.99)GIDGR.P	Y	54.41	1181.6040	12	-1.0	591.8087	2	36.80	5.6148E8	5.0265E8	5.4464E8	6.1474E8	6.5476E8	4.6404E8	4.5572E8	4.4305E8	8.5014E8	8.4549E8	9.4851E8	8.1384E7	9.2834E7	8.005E7	1.227E8	1.0382E8	1.1323E8	1.1698E8	1.1911E8	1.243E8	3.6943E8	5.2253E8	3.8554E7	3.5375E7	3.6038E7	2.8802E8	2.7637E8	2.5843E8	2.2811E7	2.4709E7	7	F7:12137	3849_02.raw	30	1	1	1	1
2	1	P08123|CO1A2_HUMAN	P.AGPIGSAGPP(+15.99)GFPGAP(+15.99)GPK.G	Y	54.40	1662.8364	19	0.6	832.4260	2	36.21							1.5305E6	1.8021E6																							7	F7:11895	3849_02.raw	2	0	0	0	0
2	1	P08123|CO1A2_HUMAN	R.GFP(+15.99)GTPGLP(+15.99)GFK.G	Y	54.37	1205.6080	12	0.8	603.8118	2	43.55		4.2575E6	3.9578E6			3.5082E6	3.9738E6	3.5954E6	4.3764E6	3.4298E6	4.2471E6										3.6621E6	4.9536E6				3.1595E6		2.8035E6			7	F7:14403	3849_02.raw	12	0	1	1	0
2	1	P08123|CO1A2_HUMAN	R.GEP(+15.99)GN(+.98)IGFP(+15.99)GPK.G	Y	54.32	1201.5614	12	1.6	601.7889	2	27.90	7.6185E8	2.3564E8	2.6131E8	3.5761E8	1.3767E8	1.664E8	1.4893E8	1.4122E8	7.6841E8	1.3779E8	1.5174E8	2.1544E7	2.154E7	1.9839E7	1.4331E7	1.3731E7	1.0901E7	1.9179E7	1.9926E7	2.1172E7	3.3519E8	4.5623E8	1.9197E7	1.7937E7	1.8211E7	1.3191E8	1.2375E8	2.4518E8	5.8162E6	5.2748E6	11	F11:8963	4312_03.raw	37	2	1	1	2
2	1	P08123|CO1A2_HUMAN	R.GAP(+15.99)GAVGAP(+15.99)GPAGATGDRGE.A	Y	54.32	1695.7811	20	2.2	848.8997	2	16.95	3.2842E6	3.7842E6	4.6984E6																		9.3512E5	1.3366E6						1.0884E6			2	F2:4703	3399_02.raw	6	1	1	1	0
2	1	P08123|CO1A2_HUMAN	G.FQGPAGEP(+15.99)GEP(+15.99)GQTGPAGAR.G	Y	54.08	1911.8710	20	-0.1	956.9426	2	20.99						1.8193E6									1.8203E6	2.6322E6	2.5003E6									2.4563E6	1.7363E6	1.8648E6			26	F26:6198	6401_01.raw	7	0	0	0	0
2	1	P08123|CO1A2_HUMAN	R.TGEVGAVGP(+15.99)P(+15.99)GFAGEKGP(+15.99)SGEAGTAGP(+15.99)PGTP(+15.99)GPQGLLGAP(+15.99)GILGLP(+15.99)GSR.G	Y	54.06	4458.1938	49	5.0	1115.5613	4	55.83								0													0										8	F8:18433	3849_03.raw	0	0	0	0	0
2	1	P08123|CO1A2_HUMAN	R.GETGPSGPVGP(+15.99)AGAVGPR.G	Y	54.00	1577.7797	18	1.2	789.8981	2	22.94	2.9711E6			1.9153E6		2.1604E6		1.8354E6		1.3664E6	1.7654E6											1.7214E6									1	F1:7128	3399_01.raw	7	1	0	0	1
2	1	P08123|CO1A2_HUMAN	K.GESGNK(+15.99)GEP(+15.99)GSAGPQGPP(+15.99)GPSGEEGK.R	Y	53.74	2411.0471	26	-1.9	804.6881	3	14.46	1.7142E6	3.0588E6	3.0017E6					4.2085E6													1.4724E6						2.7655E6	2.4229E6			27	F27:3721	6401_02.raw	7	1	1	1	0
2	1	P08123|CO1A2_HUMAN	R.GSDGSVGPVGPAGPIGSAGP(+15.99)P(+15.99)GFPGAP(+15.99)GPK.G	Y	53.63	2588.2505	30	0.4	863.7578	3	43.74	0	0	2.6826E7		0	0																					0				1	F1:14752	3399_01.raw	1	0	0	1	0
2	1	P08123|CO1A2_HUMAN	K.GEPGSAGP(+15.99)QGPP(+15.99)GPSGEEGK.R	Y	53.52	1822.7969	20	0.4	608.6065	3	15.35		1.0196E8																8.5791E6													2	F2:4200	3399_02.raw	2	0	1	0	0
2	1	P08123|CO1A2_HUMAN	E.KGPSGEAGTAGP(+15.99)PGTP(+15.99)GPQGLLGAP(+15.99)GILGLP(+15.99)GSR.G	Y	53.34	3084.5837	34	-2.3	1029.1995	3	50.47							0																				0				27	F27:16831	6401_02.raw	0	0	0	0	0
2	1	P08123|CO1A2_HUMAN	R.GLP(+15.99)GVAGAVGEP(+15.99)GPLGI.A	Y	53.26	1491.7932	17	2.1	746.9055	2	57.80	3.4824E6	2.6861E6	3.0609E6	1.45E7	1.4655E7	3.344E7	6.6096E7	8.0347E7	2.0189E7	2.1402E7	1.9409E7				7.2338E6	5.7308E6	5.0337E6	3.6366E6	3.0699E6	3.5776E6						4.1264E6	3.8051E6	4.0681E6			7	F7:19165	3849_02.raw	21	1	1	1	1
2	1	P08123|CO1A2_HUMAN	K.AGEDGHPGKPGRP(+15.99)GER.G	Y	53.20	1631.7764	16	-0.5	408.9512	4	12.52						1.6953E6																									6	F6:2977	3849_01.raw	1	0	0	0	0
2	1	P08123|CO1A2_HUMAN	R.GFP(+15.99)GTP(+15.99)GLP(+15.99)GFK.G	Y	53.03	1221.6029	12	1.6	611.8097	2	40.48	2.6923E7	2.3743E7	2.3456E7	2.259E7	2.3141E7	2.3539E7	2.0398E7	2.045E7	2.8186E7	2.9673E7	2.9786E7	6.5703E6	5.8278E6	6.1186E6					5.0194E6		2.0077E7	2.8875E7				1.5544E7	1.6303E7				7	F7:13335	3849_02.raw	19	1	1	1	1
2	1	P08123|CO1A2_HUMAN	V.AGAVGEP(+15.99)GPLGIAGPP(+15.99)GAR.G	Y	52.88	1674.8688	19	6.1	838.4468	2	36.39						3.1013E6	3.9849E6	3.1275E6																							7	F7:11910	3849_02.raw	3	0	0	0	0
2	1	P08123|CO1A2_HUMAN	K.GEP(+15.99)GLRGEIGNP(+15.99)GR.D	Y	52.82	1439.7117	14	1.1	480.9117	3	20.20	1.446E8	1.3284E8	1.4692E8	4.5299E7	4.8507E7	9.0972E7	8.3214E7	7.8689E7	1.5843E7	1.6327E7	1.7058E7							1.3832E7	1.2023E7	1.1877E7	9.6649E7	1.3554E8	3.0889E7	3.012E7	3.0307E7	9.0275E7	9.2105E7	9.3904E7			7	F7:5901	3849_02.raw	35	2	2	2	2
2	1	P08123|CO1A2_HUMAN	R.GEVGPAGPNGFAGPAGAAGQP(+15.99)GAK(+15.99)GER.G	Y	52.49	2408.1467	27	0.8	803.7235	3	26.99	3.2002E7		3.068E7	1.5993E7	1.6388E7	2.37E7	2.2228E7	2.3065E7								2.8206E6					1.9565E7	2.5241E7				1.536E7	1.5309E7				21	F21:8448	5289_01.raw	12	1	0	1	1
2	1	P08123|CO1A2_HUMAN	R.GHNGLDGLK.G	Y	52.40	909.4668	9	-1.0	455.7402	2	18.43	1.2173E7	1.0503E7	1.376E7	1.2634E7	1.3329E7	3.5167E7	3.5164E7	3.2242E7	1.6744E7		1.8856E7			6.4335E6	6.8456E6	4.9551E6	4.6898E6	7.1719E6	7.0044E6	6.8572E6	1.3094E7	1.8442E7				1.2033E7	1.1355E7	9.8614E6			7	F7:5276	3849_02.raw	22	1	1	1	1
2	1	P08123|CO1A2_HUMAN	R.TGP(+15.99)PGP(+15.99)SGISGPP(+15.99)GPP(+15.99)GPAGK.E	Y	52.38	1844.8903	21	1.1	923.4534	2	23.18	2.9388E8																									1.8603E8					26	F26:6807	6401_01.raw	2	1	0	0	0
2	1	P08123|CO1A2_HUMAN	A.AGLP(+15.99)GVAGAP(+15.99)GLP(+15.99)GPR.G	Y	52.29	1433.7626	16	2.2	717.8901	2	35.15				8.9856E6		1.1358E8	1.0058E8	1.1101E8			2.5688E7					4.7444E6												3.0923E6			7	F7:11445	3849_02.raw	10	0	0	0	1
2	1	P08123|CO1A2_HUMAN	E.VGAVGPP(+15.99)GFAGEKGP(+15.99)SGEAGTAGP(+15.99)PGTP(+15.99)GPQGLLGAP(+15.99)GILGLP(+15.99)GSR.G	Y	52.24	4155.0869	46	-0.5	1386.0355	3	54.21				0																											4	F4:18220	3484_02.raw	0	0	0	0	0
2	1	P08123|CO1A2_HUMAN	P.NGEAGSAGPP(+15.99)GPP(+15.99)GLR.G	Y	52.08	1464.6957	16	-1.4	733.3541	2	21.87				1.6208E9	3.9707E7	7.6144E7	2.1093E9	5.0727E7							3.4508E8	0	9.1684E6	4.3113E8	9.0904E6	3.9782E8						0	1.318E7	1.3928E9	1.1686E8	1.2369E8	7	F7:6561	3849_02.raw	15	0	0	0	1
2	1	P08123|CO1A2_HUMAN	R.GSDGSVGPVGPAGPIGSAGPP(+15.99)GFP(+15.99)GAPGPK(+340.10)GEIGAVGNAGPAGPAGPR.G	Y	51.86	4441.1309	48	4.0	1111.2944	4	44.86	6.5908E6		6.4799E6			6.9173E6																									1	F1:15133	3399_01.raw	3	1	0	1	0
2	1	P08123|CO1A2_HUMAN	R.GP(+15.99)PGAAGAP(+15.99)GPQGFQGPAGEP(+15.99)GEP(+15.99)GQTGPAGARG.P	Y	51.86	3015.3706	34	-1.3	1006.1295	3	27.75	6.31E7	5.8145E7	6.2452E7	3.1431E7	2.985E7	3.7108E7	3.0499E7				5.77E7	9.0086E6	7.9133E6	7.0897E6									1.5595E7	1.636E7	1.3849E7	3.1669E7	3.2212E7	2.6168E7			25	F25:8478	6313_03.raw	18	1	1	1	1
2	1	P08123|CO1A2_HUMAN	T.AGPP(+15.99)GTP(+15.99)GPQGLLGAP(+15.99)GILGLP(+15.99)GSR.G	Y	51.75	2300.2124	25	2.0	1151.1157	2	55.63						0	1.5065E5	8.5588E5																							7	F7:18442	3849_02.raw	3	0	0	0	0
2	1	P08123|CO1A2_HUMAN	V.GPAGPIGSAGPP(+15.99)GFPGAP(+15.99)GPK.G	Y	51.75	1816.9106	21	4.8	909.4670	2	38.02						6.5792E5	9.5447E5	1.0467E6																							8	F8:12456	3849_03.raw	3	0	0	0	0
2	1	P08123|CO1A2_HUMAN	E.VGAVGP(+15.99)PGFAGEKGP(+15.99)SGEAGTAGP(+15.99)PGTP(+15.99)GPQGLLGAP(+15.99)GILGLP(+15.99)GSR.G	Y	51.72	4155.0869	46	-4.7	1386.0298	3	54.44		0				0	0		0																						9	F9:18379	4312_01.raw	0	0	0	0	0
2	1	P08123|CO1A2_HUMAN	R.GEPGNIGFP(+15.99)GPK.G	Y	51.65	1184.5825	12	1.4	593.2994	2	29.41	3.8241E6	3.2866E6	3.5471E6		3.0334E6					1.3362E6	9.6659E5										1.8443E6	8.7145E5									2	F2:9497	3399_02.raw	8	1	1	1	0
2	1	P08123|CO1A2_HUMAN	R.GYP(+15.99)GNIGPVGAAGAP(+15.99)GPH.G	Y	51.55	1619.7692	18	1.1	810.8928	2	28.56	1.0104E7	8.5007E6	9.6748E6	1.7059E7	1.5246E7	9.0032E6	8.9357E6	8.7493E6	1.1205E7	1.1831E7	1.1192E7							1.7125E6	1.6969E6	1.5751E6	4.1396E6	5.8483E6				9.6687E6	9.5247E6	8.9769E6			5	F5:9148	3484_03_r.raw	19	1	1	1	1
2	1	P08123|CO1A2_HUMAN	E.VGAVGP(+15.99)PGFAGEKGP(+15.99)SGEAGTAGPPGTP(+15.99)GPQGLLGAP(+15.99)GILGLP(+15.99)GSR.G	Y	51.55	4139.0923	46	0.2	1035.7805	4	55.79								0																							8	F8:18420	3849_03.raw	0	0	0	0	0
2	1	P08123|CO1A2_HUMAN	K.GEPGSAGPQGPP(+15.99)GPSGEEGK.R	Y	51.34	1806.8019	20	1.3	904.4094	2	16.66					7.6508E6																										5	F5:4452	3484_03_r.raw	1	0	0	0	0
2	1	P08123|CO1A2_HUMAN	K.GPSGEAGTAGP(+15.99)PGTP(+15.99)GPQGLLGAPGILGLP(+15.99)GSR.G	Y	51.32	2940.4939	33	-0.5	981.1714	3	56.93	1.723E6				0				0													0									9	F9:19210	4312_01.raw	1	1	0	0	0
2	1	P08123|CO1A2_HUMAN	G.LLGAP(+15.99)GILGLP(+15.99)GSR.G	Y	51.29	1351.7822	14	0.6	676.8988	2	51.07	1.1351E7	1.0692E7	1.0873E7	2.1583E7	2.5347E7	2.8455E7	2.7978E7	2.856E7	6.0677E6	5.6807E6	6.0234E6	2.6085E6	2.1236E6	1.7738E6	4.839E6	3.2955E6	3.1893E6	1.5921E6	1.7474E6	1.6422E6	1.5594E7	1.8018E7				5.5124E7	5.5495E7	5.235E7			7	F7:16915	3849_02.raw	25	1	1	1	1
2	1	P08123|CO1A2_HUMAN	R.GAP(+15.99)GAVGAP(+15.99)GPAGATGDRGEAGAAGPAGPAGPRG.S	Y	51.18	2783.3333	34	2.0	928.7869	3	22.24	1.1238E8	9.5308E7	1.1969E8																				1.673E7	1.5529E7	1.4451E7						25	F25:6463	6313_03.raw	8	2	1	2	0
2	1	P08123|CO1A2_HUMAN	R.GAP(+15.99)GPDGNNGAQGPP(+15.99)GPQGV.Q	Y	50.99	1774.7870	20	1.6	888.4022	2	24.60								4.4865E7																							8	F8:7700	3849_03.raw	1	0	0	0	0
2	1	P08123|CO1A2_HUMAN	E.VGAVGP(+15.99)P(+15.99)GFAGEKGPSGEAGTAGP(+15.99)PGTP(+15.99)GPQGLLGAP(+15.99)GILGLP(+15.99)GSR.G	Y	50.93	4155.0869	46	1.5	1039.7805	4	55.56							0																								7	F7:18419	3849_02.raw	0	0	0	0	0
2	1	P08123|CO1A2_HUMAN	K.GPK(+178.05)GEN(+.98)GVVGPTGPVGAAGPAGPNGPP(+15.99)GPAGSR.G	Y	50.91	3027.4531	33	0.7	1010.1591	3	29.18		3.9869E6																													2	F2:9460	3399_02.raw	1	0	1	0	0
2	1	P08123|CO1A2_HUMAN	L.P(+15.99)GVAGAVGEP(+15.99)GPLGIAGPP(+15.99)GAR.G	Y	50.89	1944.0063	22	-1.6	973.0089	2	53.09	0							0	0	6.3495E5																					8	F8:17525	3849_03.raw	1	0	0	0	0
2	1	P08123|CO1A2_HUMAN	A.GTAGPP(+15.99)GTP(+15.99)GPQGLLGAP(+15.99)GILGLP(+15.99)GSR.G	Y	50.85	2458.2815	27	-0.9	820.4337	3	54.15	2.6681E6	3.1239E6	2.5681E6	3.0096E6	3.3122E6			1.1624E6	2.4822E6		2.404E6										1.4974E6					1.7342E6	1.8397E6				1	F1:18221	3399_01.raw	11	1	1	1	1
2	1	P08123|CO1A2_HUMAN	R.TGEVGAVGPP(+15.99)GFAGEKGPSGEAGTAGPP(+15.99)GTPGPQGLLGAP(+15.99)GILGLP(+15.99)GSR.G	Y	50.74	4410.2090	49	1.7	1103.5614	4	55.83		1.6541E6	0																			0									2	F2:18741	3399_02.raw	1	0	1	0	0
2	1	P08123|CO1A2_HUMAN	R.TGEVGAVGP(+15.99)PGFAGEKGPSGEAGTAGPP(+15.99)GTPGPQGLLGAP(+15.99)GILGLP(+15.99)GSR.G	Y	50.74	4410.2090	49	6.0	1103.5662	4	55.88																					0										21	F21:18441	5289_01.raw	0	0	0	0	0
2	1	P08123|CO1A2_HUMAN	R.GPNGEAGSAGP(+15.99)P(+15.99)GP(+15.99)P(+15.99)GLR.G	Y	50.60	1650.7596	18	3.4	826.3899	2	17.01											1.5238E6																				11	F11:4717	4312_03.raw	1	0	0	0	0
2	1	P08123|CO1A2_HUMAN	V.GLP(+15.99)GIDGRP(+15.99)GPIGPAGAR.G	Y	50.59	1688.8958	18	1.1	563.9731	3	32.97						1.6051E7	1.2586E7	1.1886E7																							8	F8:10679	3849_03.raw	3	0	0	0	0
2	1	P08123|CO1A2_HUMAN	R.TGP(+15.99)PGP(+15.99)SGISGP(+15.99)P(+15.99)GP(+15.99)P(+15.99)GPAGK.E	Y	50.54	1876.8801	21	-0.7	626.6335	3	19.04		2.955E7																			1.9471E7										2	F2:5604	3399_02.raw	2	0	1	0	0
2	1	P08123|CO1A2_HUMAN	P.SGISGPP(+15.99)GPP(+15.99)GPAGK.E	Y	50.54	1306.6516	15	5.7	654.3368	2	20.15				1.1751E7	1.2625E7	3.4672E7	2.8651E7	2.7211E7													1.6188E6					8.8725E6	8.6898E6	7.4949E6			7	F7:5882	3849_02.raw	9	0	0	0	1
2	1	P08123|CO1A2_HUMAN	S.GPVGPAGAVGPR.G	Y	50.50	1033.5668	12	1.0	517.7912	2	21.07				5.783E7	5.673E7	6.5441E7	6.5315E7	6.1779E7							4.1696E6	4.2104E6	3.6634E6									3.9043E6	1.9038E7	3.1209E6	1.8302E7	2.1242E7	29	F29:6307	6474_01.raw	17	0	0	0	2
2	1	P08123|CO1A2_HUMAN	K.GPSGEAGTAGPP(+15.99)GTP(+15.99)GPQGLLGAP(+15.99)GIL.G	Y	50.44	2373.1812	27	0.7	792.0682	3	58.40								2.2924E6																							8	F8:19311	3849_03.raw	1	0	0	0	0
2	1	P08123|CO1A2_HUMAN	R.GP(+15.99)PGAAGAP(+15.99)GPQGF.Q	Y	50.44	1211.5570	14	1.9	606.7869	2	29.93						2.7455E7	2.3865E7	2.6296E7	9.7757E6		1.0469E7																	2.5283E6			7	F7:9601	3849_02.raw	6	0	0	0	0
2	1	P08123|CO1A2_HUMAN	A.P(+15.99)GPHGPVGPAGK.H	Y	50.33	1085.5618	12	-2.2	362.8604	3	15.19							1.0644E6	8.3679E5																							7	F7:3898	3849_02.raw	2	0	0	0	0
2	1	P08123|CO1A2_HUMAN	K.GEN(+.98)GVVGP(+15.99)TGPVGAAGPAGPNGPP(+15.99)GPAGSR.G	Y	50.32	2583.2312	30	7.6	862.0909	3	32.96								0																							8	F8:10649	3849_03.raw	0	0	0	0	0
2	1	P08123|CO1A2_HUMAN	P.SGPVGPAGAVGPR.G	Y	50.31	1120.5989	13	-2.7	561.3052	2	23.06				1.3211E8	1.418E8	3.5596E8	3.2261E8	2.9691E8	2.7461E7	2.793E7	2.7696E7		1.279E7	1.0221E7	1.9352E7	1.7812E7	1.789E7	2.4617E7	2.4631E7	2.5336E7	4.0998E7	5.9814E7				1.1919E8	1.2248E8	1.0845E8	2.1165E7	2.0895E7	7	F7:7227	3849_02.raw	23	0	0	0	1
2	1	P08123|CO1A2_HUMAN	R.GEVGPAGPNGFAGPAGAAGQP(+15.99)GAK(+178.05)GER.G	Y	50.31	2570.1995	27	3.0	857.7430	3	26.76	6.7229E7	6.2909E7	6.8261E7	4.0167E7	4.0916E7	4.297E7	4.6283E7	4.4945E7	4.2849E7	4.6423E7	4.3075E7	7.0033E6		7.3424E6				9.1696E6	1.0626E7	1.0582E7	3.4554E7	5.2532E7	1.1366E7	9.8985E6	1.1551E7	3.9092E7	3.4905E7	3.5151E7			4	F4:8444	3484_02.raw	24	1	1	1	1
2	1	P08123|CO1A2_HUMAN	L.LGAP(+15.99)GILGLP(+15.99)GSR.G	Y	50.27	1238.6982	13	1.5	620.3573	2	42.55	5.0724E6	4.8859E6	4.0836E6	9.1431E6	9.8601E6	1.843E7	2.2546E7	1.9842E7	1.3187E7	1.2488E7	1.3392E7				8.0513E6	8.3897E6	9.2011E6	2.1402E6	2.0659E6	2.2202E6	2.7139E6	2.9115E6				8.1601E6	8.3973E6	8.8022E6			7	F7:14093	3849_02.raw	22	1	1	1	1
2	1	P08123|CO1A2_HUMAN	R.GP(+15.99)P(+15.99)GAVGSP(+15.99)GVNGAP(+15.99)GEAGR.D	Y	50.20	1766.8182	20	3.4	884.4194	2	16.02			1.8284E6																			7.1207E5									22	F22:4352	5289_03_r.raw	2	0	0	1	0
2	1	P08123|CO1A2_HUMAN	R.DGN(+.98)PGNDGP(+15.99)PGR.D	Y	50.04	1168.4745	12	2.7	585.2461	2	13.66								1.0838E6																							8	F8:3250	3849_03.raw	1	0	0	0	0
2	1	P08123|CO1A2_HUMAN	A.AGAP(+15.99)GPQGFQGPAGEP(+15.99)GEP(+15.99)GQTGPAGAR.G	Y	50.03	2563.1687	28	2.0	855.3986	3	26.66				7.6024E6		6.1548E6	3.6642E6	4.7536E6	8.2755E6	9.4455E6	9.815E6																4.5112E6				10	F10:8461	4312_02.raw	8	0	0	0	1
2	1	P08123|CO1A2_HUMAN	E.P(+15.99)GPLGIAGPP(+15.99)GAR.G	Y	49.96	1190.6406	13	-2.4	596.3262	2	46.31			1.2598E6		0				1.3029E6		9.2342E5																				9	F9:15577	4312_01.raw	3	0	0	1	0
2	1	P08123|CO1A2_HUMAN	K.GPSGEAGTAGPP(+15.99)GTPGP(+15.99)QGLLGAP(+15.99)GILGLP(+15.99)GSR.G	Y	49.85	2956.4888	33	7.1	986.5105	3	56.12											0																				11	F11:19022	4312_03.raw	0	0	0	0	0
2	1	P08123|CO1A2_HUMAN	E.KGPSGEAGTAGPP(+15.99)GTPGP(+15.99)QGLLGAP(+15.99)GILGLP(+15.99)GSR.G	Y	49.84	3084.5837	34	1.2	1029.2031	3	50.42											6.046E5															4.7582E5	0				11	F11:17081	4312_03.raw	2	0	0	0	0
2	1	P08123|CO1A2_HUMAN	R.GYP(+15.99)GNIGPVGAAGAPGP(+15.99)HGPVGPAGK(+114.04).H	Y	49.80	2397.1824	26	0.2	800.0682	3	29.72	0																				4.9406E7										21	F21:9301	5289_01.raw	1	0	0	0	0
2	1	P08123|CO1A2_HUMAN	R.GEVGLP(+15.99)GLSGP(+15.99)VGPP(+15.99)GNP(+15.99)GANGLTGAK.G	Y	49.69	2433.2134	27	4.5	812.0820	3	44.42																			0												19	F19:14766	4484_02.raw	0	0	0	0	0
2	1	P08123|CO1A2_HUMAN	R.TGEVGAVGPPGFAGEKGP(+15.99)SGEAGTAGP(+15.99)P(+15.99)GTP(+15.99)GPQGLLGAP(+15.99)GILGLP(+15.99)GSR.G	Y	49.68	4442.1987	49	2.1	1111.5593	4	56.00						3.4911E7																									6	F6:18556	3849_01.raw	1	0	0	0	0
2	1	P08123|CO1A2_HUMAN	R.GHN(+.98)GLDGLK.G	Y	49.59	910.4508	9	0.3	456.2328	2	18.82	8.7544E6	5.433E6	6.3384E6	0		1.1146E7	9.2351E6	8.3126E6	1.8693E7												7.9843E6	1.0695E7				7.1999E6	9.0943E6				2	F2:5449	3399_02.raw	11	1	1	1	0
2	1	P08123|CO1A2_HUMAN	K.RGPNGEAGSAGPP(+15.99)GP(+15.99)PGLR.G	Y	49.57	1774.8710	19	0.3	888.4430	2	19.48				1.108E7	2.1658E8			2.7656E7		2.0593E8			4.6925E7					4.8286E7			3.1195E8		8.1649E7			1.3159E7	2.5258E8	1.1847E7			28	F28:5688	6401_03.raw	12	0	0	0	1
2	1	P08123|CO1A2_HUMAN	L.HGEFGLP(+15.99)GPAGPR.G	Y	49.44	1306.6417	13	-0.1	436.5545	3	28.69	1.4659E6	8.5086E5		1.2409E7	1.2077E7	4.4261E6	4.5345E6	3.1111E6	4.2806E6	4.6703E6	5.1885E6				1.9842E6				3.4447E5												11	F11:9290	4312_03.raw	16	1	1	0	2
2	1	P08123|CO1A2_HUMAN	E.P(+15.99)GVVGAVGT(+203.08)AGPSGPSGLPGER.G	Y	49.44	2137.0652	22	8.6	713.3685	3	36.56	1.0712E7	8.7145E6	8.71E6	5.4176E6			3.1976E6	3.5855E6	1.1083E7	1.0935E7	1.1688E7										9.663E6	1.1925E7									11	F11:12283	4312_03.raw	11	1	1	1	1
2	1	P08123|CO1A2_HUMAN	A.VGEP(+15.99)GPLGIAGPP(+15.99)GAR.G	Y	49.26	1475.7732	16	2.3	738.8956	2	33.83				7.8365E6	7.6677E6	1.1267E7	9.7765E6	8.4903E6	1.4794E7	1.7055E7	1.488E7				2.5067E6	2.0378E6		1.5202E6								5.5371E6	5.383E6	6.4258E6			11	F11:11273	4312_03.raw	14	0	0	0	1
2	1	P08123|CO1A2_HUMAN	R.GPAGPSGPAGK.D	Y	49.22	894.4559	11	0.4	448.2354	2	12.99	6.4236E6	6.2987E6	8.7921E6	2.9104E6	2.049E6	2.456E6	4.699E6	4.9484E6	3.4399E6	3.4159E6	3.6295E6		1.0597E6	0					2.3354E5	2.9657E5	1.1214E6	3.9822E6	5.6242E5	5.4723E5	5.5338E5	2.2846E6	3.8876E6	3.0574E6			3	F3:3281	3399_03.raw	22	1	1	1	1
2	1	P08123|CO1A2_HUMAN	I.DGRPGPIGPAGAR.G	Y	49.19	1219.6421	13	3.3	610.8303	2	40.68	3.6557E6	3.1863E6																													1	F1:13616	3399_01.raw	2	1	1	0	0
2	1	P08123|CO1A2_HUMAN	A.AGAP(+15.99)GPHGPVGPAGK.H	Y	49.18	1284.6573	15	-1.7	429.2256	3	15.45						3.1828E7	2.8186E7	2.6263E7																							7	F7:4015	3849_02.raw	3	0	0	0	0
2	1	P08123|CO1A2_HUMAN	K.RGPN(+.98)GEAGSAGP(+15.99)PGP(+15.99)PGLR.G	Y	49.10	1775.8550	19	3.1	888.9375	2	21.74								4.7836E6																							8	F8:6510	3849_03.raw	1	0	0	0	0
2	1	P08123|CO1A2_HUMAN	L.P(+15.99)GSP(+15.99)GNIGPAGK.E	Y	48.95	1082.5355	12	0.2	542.2751	2	20.68	1.3794E7	1.3112E7	1.1835E7	1.3944E7	1.2876E7	1.3606E7	1.9763E7	1.7549E7	1.1269E7	1.2599E7	1.0672E7		2.7411E6	4.2683E6				3.4773E6		4.1883E6	9.3266E6	0			2.2314E6	7.8907E6	8.5965E6	7.4172E6	9.7377E5		11	F11:6140	4312_03.raw	21	1	1	1	1
2	1	P08123|CO1A2_HUMAN	E.GPVGLP(+15.99)GIDGRPGPIGPAGAR.G	Y	48.94	1926.0435	21	0.7	643.0222	3	40.89				3.5151E6	3.8225E6	9.3594E6	9.063E6	8.7142E6																		2.1468E7	2.1407E7	2.1091E7			8	F8:13472	3849_03.raw	8	0	0	0	1
2	1	P08123|CO1A2_HUMAN	K.GESGNKGEP(+15.99)GSAGP(+15.99)QGPP(+15.99)GPSGEEGK.R	Y	48.90	2411.0471	26	-4.1	804.6863	3	14.39				2.2081E6	1.8775E6				1.9411E6		2.4726E6											3.2493E6									22	F22:3687	5289_03_r.raw	5	0	0	0	1
2	1	P08123|CO1A2_HUMAN	L.P(+15.99)GVAGAVGEP(+15.99)GPLGIAGP(+15.99)PGAR.G	Y	48.90	1944.0063	22	0.6	973.0110	2	52.04											5.3382E5																				11	F11:17695	4312_03.raw	1	0	0	0	0
2	1	P08123|CO1A2_HUMAN	R.GPSGPQGIRGDK(+15.99)GEP(+15.99)GEK.G	Y	48.86	1796.8652	18	0.6	450.2238	4	13.85	1.4513E7		2.2139E7	5.6635E6		2.4733E6	7.1698E6	6.0982E6			3.0057E6								1.3259E6				1.9246E6	1.1869E6	1.6158E6		1.0289E7				11	F11:3485	4312_03.raw	13	1	0	2	1
2	1	P08123|CO1A2_HUMAN	R.GSDGSVGPVGPAGP(+15.99)IGSAGPP(+15.99)GFP(+15.99)GAP(+15.99)GPK.G	Y	48.76	2604.2454	30	4.1	869.0926	3	41.17				0						4.0332E7			0									6.4679E7									22	F22:14017	5289_03_r.raw	2	0	0	0	0
2	1	P08123|CO1A2_HUMAN	A.GLP(+15.99)GVAGAP(+15.99)GLP(+15.99)GPR.G	Y	48.72	1362.7255	15	1.8	682.3712	2	33.92					1.1616E7	3.2844E7	3.0651E7	3.2624E7	1.3693E7	1.3678E7	7.1844E7				1.1347E7	1.0861E7	9.8081E6		5.8868E6	6.4035E6						5.5075E6	4.4332E6	4.9136E6			7	F7:11051	3849_02.raw	16	0	0	0	0
2	1	P08123|CO1A2_HUMAN	A.VGNAGPAGPAGPR.G	Y	48.71	1119.5785	13	0.0	560.7965	2	15.61	0	0		7.1857E6	7.4386E6	8.309E6	8.6884E6	8.6982E6	9.6772E6	1.0522E7	1.1406E7				2.3365E6	1.9272E6	2.2439E6	1.4454E6	1.6461E6	1.1644E6	1.3367E6	1.9861E6				3.8809E6	4.1077E6	3.7773E6			11	F11:4145	4312_03.raw	19	0	0	0	1
2	1	P08123|CO1A2_HUMAN	T.AGPSGPSGLP(+15.99)GER.G	Y	48.66	1196.5785	13	-0.2	599.2964	2	20.75				1.3187E7	1.2815E7	1.8992E8	1.855E8	1.8298E8	3.3664E7	3.1263E7	3.4098E7		1.0622E6	7.9391E5	9.5035E6	1.1977E7	1.1666E7	4.2387E6	3.4726E6			3.6343E6				6.6005E6		7.1309E6			7	F7:6194	3849_02.raw	18	0	0	0	1
2	1	P08123|CO1A2_HUMAN	D.RGEAGAAGPAGPAGPR.G	Y	48.61	1390.7065	16	1.2	464.5767	3	14.56		4.8187E6	5.3342E6	2.7139E6	2.606E6				4.1289E6	4.1637E6	4.8476E6										2.0373E6	4.6591E6				1.6291E6	1.7824E6				2	F2:3777	3399_02.raw	11	0	1	1	1
2	1	P08123|CO1A2_HUMAN	R.GEVGPAGPNGFAGPAGAAGQPGAK.G	Y	48.61	2033.9918	24	-0.4	679.0043	3	31.34	2.9107E6		2.808E6																												1	F1:10302	3399_01.raw	2	1	0	1	0
2	1	P08123|CO1A2_HUMAN	R.GSDGSVGPVGPAGPIGSAGP(+15.99)PGFPGAP(+15.99)GPK(+178.05)GEIGAVGNAGPAGPAGPR.G	Y	48.48	4279.0781	48	1.3	1070.7782	4	45.38	4.2102E6		5.3125E7	8.5605E6																					3.3324E6						25	F25:14718	6313_03.raw	5	1	0	2	1
2	1	P08123|CO1A2_HUMAN	R.GPNGDAGRP(+15.99)GEP(+15.99)GLMGP(+15.99)R.G	Y	48.39	1781.8114	18	-0.5	594.9441	3	17.16	4.1093E8	3.8845E8	4.1656E8	2.1235E8	2.1117E8	3.388E8	3.2884E8	2.8403E8	2.0716E8	2.1789E8	2.2648E8			5.7998E7	5.0562E7		4.1404E7	6.9676E7		6.6769E7	2.1391E8	3.0182E8	3.816E7		3.1414E7	6.9046E6	2.0985E8	1.8351E8	6.9189E6		7	F7:4617	3849_02.raw	38	2	2	2	2
2	1	P08123|CO1A2_HUMAN	R.GPQGHQGPAGP(+15.99)PGP(+15.99)P(+15.99)GP(+15.99)PGPP(+15.99)GVSGGGYDFGYDGDFY.R	Y	48.37	3588.5129	37	2.6	1197.1814	3	50.34								0																							8	F8:16608	3849_03.raw	0	0	0	0	0
2	1	P08123|CO1A2_HUMAN	K.GEQGP(+15.99)P(+15.99)GPPGFQGLP(+15.99)GPSGPAGEVGKP(+15.99)GER.G	Y	48.33	2873.3579	30	-3.9	719.3439	4	35.68																					0										21	F21:11544	5289_01.raw	0	0	0	0	0
2	1	P08123|CO1A2_HUMAN	K.GPK(+15.99)GEN(+.98)GVVGPTGPVGAAGPAGPNGPP(+15.99)GPAGSR.G	Y	48.31	2865.4004	33	1.6	956.1423	3	29.41		1.6968E6																													2	F2:9523	3399_02.raw	1	0	1	0	0
2	1	P08123|CO1A2_HUMAN	K.GENGVVGPTGPVGA.A	Y	48.31	1209.5989	14	0.5	605.8070	2	32.20						1.364E7	1.1664E7	1.0733E7																							8	F8:10383	3849_03.raw	3	0	0	0	0
2	1	P08123|CO1A2_HUMAN	K.GEQGPP(+15.99)GPP(+15.99)GFQGLP(+15.99)GPSGPAGEVGKP(+15.99)GERG.L	Y	48.29	2930.3794	31	1.0	977.8014	3	34.70	8.6376E7	8.4401E7	8.534E7	9.7961E7	8.171E7	8.8183E7	8.7597E7	9.6465E7													8.9476E7	1.3564E8				5.7064E7	6.2227E7	6.817E7			2	F2:11439	3399_02.raw	20	2	2	2	2
2	1	P08123|CO1A2_HUMAN	A.GTAGP(+15.99)PGTP(+15.99)GPQGLLGAP(+15.99)GILGLP(+15.99)GSR.G	Y	48.16	2458.2815	27	-0.9	820.4337	3	55.53					3.3122E6		1.0933E6		2.4822E6	2.8212E6																					7	F7:18379	3849_02.raw	4	0	0	0	0
2	1	P08123|CO1A2_HUMAN	A.VGAP(+15.99)GPAGATGDR.G	Y	48.02	1140.5522	13	-0.3	571.2832	2	14.55				1.2272E6	1.2454E6	1.219E6			2.6476E6	2.6519E6	3.4397E6																1.6854E6	1.3241E6			11	F11:3739	4312_03.raw	8	0	0	0	1
2	1	P08123|CO1A2_HUMAN	H.HGDQGAP(+15.99)GSVGPAGPR.G	Y	47.98	1474.6913	16	1.1	492.5716	3	14.51					2.7285E6																					2.6941E6	3.585E6				5	F5:3720	3484_03_r.raw	3	0	0	0	0
2	1	P08123|CO1A2_HUMAN	R.GDGGPP(+15.99)GMTGFP(+15.99)GAAGR.T	Y	47.79	1532.6677	17	-4.8	767.3375	2	23.13			9.2348E6	5.2629E6	5.3662E6				7.0042E6	7.1528E6											5.0617E6	9.4936E6				3.1766E6					4	F4:7230	3484_02.raw	8	0	0	1	1
2	1	P08123|CO1A2_HUMAN	R.DGNPGN(+.98)DGPP(+15.99)GR.D	Y	47.67	1168.4745	12	-0.3	585.2443	2	12.84			0																												3	F3:3181	3399_03.raw	0	0	0	0	0
2	1	P08123|CO1A2_HUMAN	R.GPQGHQGPAGPP(+15.99)GPP(+15.99)GP(+15.99)PGPP(+15.99)GVSGGGYDFGYDGDFY.R	Y	47.58	3572.5181	37	1.5	1191.8484	3	50.12		4.2404E7	4.515E7			2.5941E7		2.4964E7		2.3536E7	2.3615E7																1.8203E7	1.5739E7			2	F2:16791	3399_02.raw	8	0	1	1	0
2	1	P08123|CO1A2_HUMAN	A.AGLP(+15.99)GVAGAP(+15.99)GLPGP(+15.99)R.G	Y	47.51	1433.7626	16	1.5	717.8896	2	35.14					9.016E6	1.0665E8	9.6529E7	1.0583E8	2.4527E7																		3.6293E6				8	F8:11515	3849_03.raw	6	0	0	0	0
2	1	P08123|CO1A2_HUMAN	V.GLP(+15.99)GIDGRPGPIGPAGAR.G	Y	47.49	1672.9008	18	1.5	558.6417	3	35.16						1.1371E7	8.8703E6	1.0419E7																							7	F7:11471	3849_02.raw	3	0	0	0	0
2	1	P08123|CO1A2_HUMAN	K.GPSGEAGTAGPP(+15.99)GTPGP(+15.99)QGLLGAPGILGLP(+15.99)GSR.G	Y	47.48	2940.4939	33	-2.3	981.1696	3	56.83										0	0																				10	F10:19176	4312_02.raw	0	0	0	0	0
2	1	P08123|CO1A2_HUMAN	G.AAGLP(+15.99)GVAGAP(+15.99)GLPGP(+15.99)R.G	Y	47.45	1504.7997	17	3.7	753.4099	2	34.36						6.3711E6	5.5796E6	6.4744E6	2.9874E6	3.1813E6																2.1429E6					9	F9:11404	4312_01.raw	6	0	0	0	0
2	1	P08123|CO1A2_HUMAN	K.GPSGEAGTAGPP(+15.99)GTP(+15.99)GPQG.L	Y	47.43	1622.7172	19	-1.7	812.3645	2	18.99					3.2578E6	5.4182E6	5.8682E6								5.4154E6												8.4381E6	8.7429E6			7	F7:5349	3849_02.raw	6	0	0	0	0
2	1	P08123|CO1A2_HUMAN	P.AGEP(+15.99)GEP(+15.99)GQTGPAGAR.G	Y	47.42	1482.6698	16	-0.2	742.3420	2	14.19						2.9573E6	2.8106E6	2.7148E6																						2.8208E5	7	F7:3532	3849_02.raw	4	0	0	0	0
2	1	P08123|CO1A2_HUMAN	V.GLP(+15.99)GLSGPVGPP(+15.99)GNP(+15.99)GANGLTGAK.G	Y	47.42	2132.0862	24	-0.3	1067.0500	2	41.02								7.8139E5																							8	F8:13486	3849_03.raw	1	0	0	0	0
2	1	P08123|CO1A2_HUMAN	R.GPSGPQGIRGDK(+15.99)GEP(+15.99)GEK(+15.99)GPR.G	Y	47.35	2123.0354	21	0.7	531.7665	4	13.92	7.6009E7	7.0776E7	7.9164E7	1.2777E7	1.2014E7	1.4185E7	1.5635E7	1.1367E7	3.0016E6	6.9067E6	3.4891E6										1.3603E7	4.414E7	1.0795E7	8.9964E6	2.8942E6	3.1757E7	3.5578E7	3.3104E7			24	F24:3456	6313_02.raw	33	2	2	2	3
2	1	P08123|CO1A2_HUMAN	K.GEN(+.98)GVVGPTGPVGAAGP(+15.99)AGPNGPP(+15.99)GPAGSR.G	Y	47.31	2583.2312	30	4.5	862.0882	3	31.57	0										0																				1	F1:10368	3399_01.raw	0	0	0	0	0
2	1	P08123|CO1A2_HUMAN	K.GPSGEAGTAGPP(+15.99)GTP(+15.99)GPQGLLGAPGILGLP(+15.99)GSR.G	Y	47.16	2940.4939	33	-1.2	981.1708	3	58.07		2.306E6						1.3212E5													1.6402E6							0			8	F8:19172	3849_03.raw	3	0	1	0	0
2	1	P08123|CO1A2_HUMAN	R.GIPGP(+15.99)VGAAGATGAR.G	Y	47.09	1266.6680	15	1.1	423.2304	3	23.91	3.4546E7																				2.4687E7										21	F21:7347	5289_01.raw	2	1	0	0	0
2	1	P08123|CO1A2_HUMAN	R.GPSGPQGIRGDKGEP(+15.99)GEKGPR.G	Y	47.07	2091.0457	21	-0.4	523.7685	4	14.21	0	0	8.8192E5																				0	7.2291E5	0						25	F25:3559	6313_03.raw	2	0	0	1	0
2	1	P08123|CO1A2_HUMAN	R.GEP(+15.99)GNIGFP(+15.99)GP(+15.99)K.G	Y	47.06	1216.5723	12	-0.7	609.2930	2	26.39	2.0921E7	1.8961E7	1.8286E7	1.6346E7	1.6342E7	1.4384E7	1.5645E7	1.3326E7	2.1195E7	2.078E7	2.2615E7	1.5529E6	2.0905E6						2.5685E6	3.094E6	8.523E6	1.3311E7				7.6604E6	8.5248E6	8.4802E6			26	F26:8332	6401_01.raw	20	1	1	1	1
2	1	P08123|CO1A2_HUMAN	R.TGEVGAVGPP(+15.99)GFAGEKGPSGEAGTAGPP(+15.99)GTPGP(+15.99)QGLLGAP(+15.99)GILGLP(+15.99)GSR.G	Y	46.94	4426.2036	49	-1.8	1107.5562	4	55.68					0																										5	F5:18694	3484_03_r.raw	0	0	0	0	0
2	1	P08123|CO1A2_HUMAN	E.IGAVGN(+.98)AGPAGPAGPR.G	Y	46.78	1361.7051	16	-0.6	681.8594	2	24.29				4.0282E6	4.4834E6			3.2699E6	0	4.6994E6																					9	F9:7596	4312_01.raw	4	0	0	0	1
2	1	P08123|CO1A2_HUMAN	A.VGSP(+15.99)GVNGAP(+15.99)GEAGR.D	Y	46.75	1355.6428	15	-0.6	678.8282	2	14.58	5.9878E6	6.7404E6	6.5079E6	1.0231E7	7.2815E6	0	9.7845E6	8.4531E6	1.4192E7	1.3956E7	1.4051E7	1.066E6	1.2275E6	8.9566E5	1.769E6	2.0048E6	1.9449E6	1.8612E6	1.6478E6	1.8897E6	2.3827E6			2.2887E5		5.9168E6	6.2282E6	5.1963E6	6.71E4		26	F26:3717	6401_01.raw	25	1	1	1	1
2	1	P08123|CO1A2_HUMAN	R.GLVGEP(+15.99)GPAGSK(+15.99)GESGN(+.98)K.G	Y	46.72	1672.7903	18	1.7	558.6050	3	15.88	1.2054E7	1.2375E7	1.0937E7	3.8645E6	3.9928E6	7.4653E6	5.2068E6	7.0845E6													9.2996E6	1.1218E7				5.1163E6	6.6672E6	5.2019E6			22	F22:4264	5289_03_r.raw	13	1	1	1	1
2	1	P08123|CO1A2_HUMAN	R.GSDGSVGPVGPAGP(+15.99)IGSAGPP(+15.99)GFPGAP(+15.99)GPK.G	Y	46.71	2588.2505	30	3.3	863.7603	3	43.74				0										0																	4	F4:14703	3484_02.raw	0	0	0	0	0
2	1	P08123|CO1A2_HUMAN	K.GEIGAVGNAGPAGP(+15.99)AGPR.G	Y	46.70	1562.7800	18	3.4	782.4000	2	23.73													0								0										21	F21:7200	5289_01.raw	0	0	0	0	0
2	1	P08123|CO1A2_HUMAN	E.RGLP(+15.99)GVAGAVGEP(+15.99)GPLGIAGPP(+15.99)GAR.G	Y	46.66	2270.2129	25	2.1	757.7465	3	41.78		1.0089E7	1.1014E7																		1.0079E7	1.316E7						5.9761E6			3	F3:14012	3399_03.raw	5	0	1	1	0
2	1	P08123|CO1A2_HUMAN	P.AGPNGFAGPAGAAGQP(+15.99)GAK(+15.99)GER.G	Y	46.49	1968.9401	22	0.8	657.3212	3	21.36							2.6015E6	3.265E6																							8	F8:6302	3849_03.raw	2	0	0	0	0
2	1	P08123|CO1A2_HUMAN	R.GAP(+15.99)GPDGNNGAQGPP(+15.99)GP(+15.99)QGVQGGK.G	Y	46.40	2160.9783	24	1.3	1081.4978	2	16.73	9.1445E6	3.1561E6																													2	F2:4585	3399_02.raw	2	1	1	0	0
2	1	P08123|CO1A2_HUMAN	R.PGPIGPAGAR.G	Y	46.38	891.4926	10	-0.6	446.7533	2	18.28	1.8027E8	1.7515E8	1.7244E8	2.2484E8	2.3134E8	2.222E8	2.1655E8	2.0804E8	2.7544E8	2.8221E8	2.9005E8	3.4086E7	3.2351E7	2.8967E7	4.2884E7	4.1279E7	4.07E7	3.9598E7	3.8023E7	4.0528E7	1.1766E8	1.7979E8	1.1464E7	1.0192E7	9.9162E6	1.3767E8	1.4216E8	1.3199E8	7.226E6	7.2096E6	11	F11:5413	4312_03.raw	30	1	1	1	1
2	1	P08123|CO1A2_HUMAN	G.ISGPP(+15.99)GPP(+15.99)GPAGK.E	Y	46.24	1162.5981	13	0.3	582.3065	2	17.38						3.1058E7	0	2.909E7																		4.5137E7	5.1025E7	4.6308E7			28	F28:4821	6401_03.raw	5	0	0	0	0
2	1	P08123|CO1A2_HUMAN	G.EIGAVGNAGPAGPAGPR.G	Y	46.17	1489.7637	17	2.1	745.8907	2	25.42				3.16E6	3.0502E6	9.8509E5	7.7778E5			5.2583E5	6.7633E5																				5	F5:7983	3484_03_r.raw	6	0	0	0	1
2	1	P08123|CO1A2_HUMAN	R.P(+15.99)GPIGPAGAR.G	Y	45.89	907.4875	10	0.4	454.7512	2	18.06	2.1351E8	2.0172E8	2.235E8	2.3651E8	2.5096E8	2.2263E8	2.313E8	2.0805E8	1.8858E8	1.8891E8	2.0119E8	3.6416E7	3.6079E7	3.0731E7	5.3062E7	5.1136E7	4.9233E7	4.338E7	3.9982E7	3.783E7	1.5357E8	2.1703E8	9.0498E6		8.2137E6	1.3315E8	1.4817E8	1.4305E8			7	F7:5019	3849_02.raw	27	1	1	1	1
2	1	P08123|CO1A2_HUMAN	R.DGNPGNDGPP(+15.99)GR.D	Y	45.83	1167.4905	12	0.3	584.7527	2	13.22						1.0535E6		1.6255E6																							8	F8:3250	3849_03.raw	2	0	0	0	0
2	1	P08123|CO1A2_HUMAN	E.RGLP(+15.99)GVAGAVGEP(+15.99)GPLGIAGP(+15.99)PGAR.G	Y	45.81	2270.2129	25	3.3	757.7474	3	41.89	1.1219E7			2.917E6																											1	F1:14001	3399_01.raw	2	1	0	0	1
2	1	P08123|CO1A2_HUMAN	V.GAVGTAGPSGPSGLPGER.G	Y	45.79	1565.7798	18	0.5	783.8976	2	28.97						4.7784E6	4.0518E6	3.5285E6																							6	F6:9328	3849_01.raw	3	0	0	0	0
2	1	P08123|CO1A2_HUMAN	Q.GLLGAP(+15.99)GILGLP(+15.99)GSR.G	Y	45.77	1408.8037	15	-0.5	705.4088	2	52.94	2.1769E6	1.7129E6	2.0316E6	3.9226E6	4.4475E6	3.0903E6	3.6193E6	3.16E6	7.1281E6	6.3319E6	6.4176E6						5.5226E6				1.2523E6	1.5431E6				4.0203E6	4.1096E6	3.9099E6			9	F9:17904	4312_01.raw	17	1	1	1	1
2	1	P08123|CO1A2_HUMAN	N.IGPVGAAGAP(+15.99)GPHGPVGPAGK.H	Y	45.65	1778.9426	21	2.5	593.9896	3	26.53						3.7405E6	3.6571E6																								7	F7:8409	3849_02.raw	2	0	0	0	0
2	1	P08123|CO1A2_HUMAN	A.GAVGEP(+15.99)GPLGIAGPP(+15.99)GAR.G	Y	45.61	1603.8317	18	3.8	802.9261	2	34.72						1.8127E6	1.5535E6				4.2479E6																				11	F11:11620	4312_03.raw	3	0	0	0	0
2	1	P08123|CO1A2_HUMAN	R.GSDGSVGPVGPAGPIGSAGP(+15.99)PGFPGAPGP(+15.99)K(+178.05)GEIGAVGNAGPAGPAGPR.G	Y	45.52	4279.0781	48	-1.2	1427.3650	3	45.31				8.5605E6																											4	F4:15208	3484_02.raw	1	0	0	0	1
2	1	P08123|CO1A2_HUMAN	I.GAVGNAGPAGPAGPR.G	Y	45.46	1247.6370	15	0.0	624.8257	2	18.41						0	0	0																							7	F7:5199	3849_02.raw	0	0	0	0	0
2	1	P08123|CO1A2_HUMAN	K.RGPNGEAGSAGP(+15.99)PGP(+15.99)PGLR.G	Y	45.33	1774.8710	19	2.3	888.4448	2	19.53			4.255E7																		1.4507E7										21	F21:5521	5289_01.raw	2	0	0	1	0
2	1	P08123|CO1A2_HUMAN	R.TGP(+15.99)PGP(+15.99)SGISGPP(+15.99)GP(+15.99)P(+15.99)GPAGK.E	Y	45.27	1860.8853	21	-1.8	621.3013	3	22.27			3.9309E7				2.245E7						5.7714E6							3.6283E6											7	F7:6778	3849_02.raw	4	0	0	1	0
2	1	P08123|CO1A2_HUMAN	A.GAP(+15.99)GPHGPVGPAGK.H	Y	45.23	1213.6202	14	-0.8	607.8169	2	15.92					9.8853E5	6.3328E6	3.8115E6																								6	F6:4242	3849_01.raw	4	0	0	0	0
2	1	P08123|CO1A2_HUMAN	R.GVVGPQGAR.G	Y	45.19	839.4613	9	-0.9	420.7375	2	15.53	1.2427E7	0	1.234E7	6.9499E6	7.4965E6	3.3044E8	3.2801E8	2.9512E8	8.7223E6	1.026E7	9.3964E6	4.8535E7	4.0388E7	3.8455E7	4.5321E7	3.1448E7	3.5995E7	0		1.6675E6	7.1514E6	1.0772E7	1.6975E6	0	1.4591E6	4.4169E6	0	0			8	F8:4081	3849_03.raw	22	1	0	1	1
2	1	P08123|CO1A2_HUMAN	R.GSDGS(+79.97)VGPVGPAGPIGS(+203.08)AGPPGFPGAPGPKGEIGAVGNAGPAGPAGPR.G	Y	45.19	4352.0859	48	3.6	1089.0327	4	45.05	4.0763E7	3.5033E7	3.3403E7	4.8455E7	4.1015E7	3.5126E7	3.1041E7	3.1386E7	6.5328E7	5.8701E7	5.6703E7										5.739E7	5.9322E7				1.8588E7	2.0321E7	2.2334E7			8	F8:14855	3849_03.raw	22	1	1	1	1
2	1	P08123|CO1A2_HUMAN	R.GEAGAAGPAGP(+15.99)AGPR.G	Y	44.93	1250.6002	15	-0.4	626.3071	2	14.49		2.248E7		1.2409E7							1.4004E7										7.538E6	1.3609E7									21	F21:3728	5289_01.raw	5	0	1	0	1
2	1	P08123|CO1A2_HUMAN	R.TGEVGAVGPP(+15.99)GFAGEKGPSGEAGTAGP(+15.99)PGTPGPQGLLGAP(+15.99)GILGLP(+15.99)GSR.G	Y	44.93	4410.2090	49	1.8	1103.5615	4	55.74	1.7892E6																														1	F1:18765	3399_01.raw	1	1	0	0	0
2	1	P08123|CO1A2_HUMAN	R.VGAP(+15.99)GPAGAR.G	Y	44.87	867.4562	10	-0.7	434.7351	2	13.78	1.166E7	1.2462E7	1.4528E7	4.5055E6	3.0682E6	8.4326E6	1.1114E7	1.157E7	7.4404E6	7.2634E6	7.4969E6	2.2626E6	2.9553E6	1.9634E6	1.0231E6	1.217E6	1.181E6		9.0182E5	7.4962E5	5.6463E6	7.6029E6	1.118E6	1.0824E6	1.1321E6	3.1478E6	6.9521E6	5.9094E6			7	F7:3361	3849_02.raw	27	1	1	1	1
2	1	P08123|CO1A2_HUMAN	A.RGSDGSVGP(+15.99)VGP(+15.99)AGP(+15.99)IGSAGP(+15.99)P(+15.99)GFP(+15.99)GAP(+15.99)GPKGEIGAVGNAGPAGPAGPR.G	Y	44.83	4337.1060	49	0.5	1446.7100	3	46.75								2.0891E5																							8	F8:15417	3849_03.raw	1	0	0	0	0
2	1	P08123|CO1A2_HUMAN	I.SGPP(+15.99)GPP(+15.99)GPAGK.E	Y	44.75	1049.5140	12	0.9	525.7648	2	14.36						4.1768E7	4.6372E7	3.8357E7																							7	F7:3591	3849_02.raw	3	0	0	0	0
2	1	P08123|CO1A2_HUMAN	G.PS(+203.08)GPPGPDGNKGEPGVVGAVGTAGPSGPSGLP(+15.99)GER.G	Y	44.58	3326.6013	35	-6.0	1109.8677	3	36.62	7.1261E6	5.5836E6					0																								7	F7:12028	3849_02.raw	2	1	1	0	0
2	1	P08123|CO1A2_HUMAN	P.VGPAGPIGS(+365.13)AGPPGFPGAPGPK(+114.04)GEIGAVGNAGPAGPAGPR.G	Y	44.48	3891.9390	40	6.6	973.9984	4	43.40											0																				11	F11:14732	4312_03.raw	0	0	0	0	0
2	1	P08123|CO1A2_HUMAN	P.VGPP(+15.99)GNP(+15.99)GANGLTGAK.G	Y	44.45	1437.7212	16	0.9	719.8685	2	21.02						6.5427E6	6.1293E6	5.9261E6																							8	F8:6192	3849_03.raw	3	0	0	0	0
2	1	P08123|CO1A2_HUMAN	R.GSDGSVGPVGPAGPIGSAGP(+15.99)PGFP(+15.99)GAPGPK(+178.05)GEIGAVGNAGPAGPAGPR.G	Y	44.45	4279.0781	48	-0.9	1070.7759	4	46.88	5.5057E7						4.7655E7							2.1049E6							9.6052E6										14	F14:15223	4371_03.raw	4	1	0	0	0
2	1	P08123|CO1A2_HUMAN	E.AGSAGPP(+15.99)GPP(+15.99)GLR.G	Y	44.38	1164.5886	13	0.4	583.3018	2	21.00				3.5732E7	4.0348E7	2.851E7	2.7753E7	2.7923E7					4.0861E6	3.3756E6	2.7084E6	2.5774E6	2.3167E6	4.1105E6	3.8042E6	4.9612E6			5.8081E6			2.2347E7	1.8635E7	2.0151E7			6	F6:6275	3849_01.raw	17	0	0	0	1
2	1	P08123|CO1A2_HUMAN	A.GTAGPP(+15.99)GTPGP(+15.99)QGLLGAP(+15.99)GILGLP(+15.99)GSR.G	Y	44.37	2458.2815	27	-0.7	820.4338	3	54.31										2.8212E6												1.8406E6						1.3384E6			10	F10:18314	4312_02.raw	3	0	0	0	0
2	1	P08123|CO1A2_HUMAN	V.GSP(+15.99)GVNGAP(+15.99)GEAGR.D	Y	44.35	1256.5745	14	-0.9	629.2939	2	14.08						1.8857E6	2.6884E6	1.8849E6																							6	F6:3489	3849_01.raw	3	0	0	0	0
2	1	P08123|CO1A2_HUMAN	R.TGPPGP(+15.99)SGISGPP(+15.99)GPP(+15.99)GPAGK.E	Y	44.31	1828.8954	21	1.3	610.6399	3	24.43	5.3881E7	5.6222E7		2.1465E7	2.2838E7	8.6066E7	2.1356E7	6.6475E7	2.9342E7						1.6219E7	1.3225E7	1.2425E7				4.8688E7	6.932E7	4.2232E6		3.6236E6	3.0142E7					2	F2:7538	3399_02.raw	18	1	1	0	1
2	1	P08123|CO1A2_HUMAN	R.GLVGEP(+15.99)GP(+15.99)AGSK.G	Y	44.22	1099.5509	12	0.2	550.7828	2	17.71	1.4092E8	1.3991E8	1.4677E8	9.7029E7	9.9941E7	8.3594E7	8.1581E7	7.2594E7	8.9613E7	8.5521E7	9.1747E7	1.1757E7	1.2328E7	1.1513E7	1.645E7	1.6074E7	1.7184E7	1.4238E7	1.3873E7	1.3951E7	7.1602E7	1.0599E8	1.1596E7	1.0674E7	1.0757E7	6.5355E7	7.1584E7	6.899E7	4.7228E6		28	F28:4859	6401_03.raw	29	1	1	1	1
2	1	P08123|CO1A2_HUMAN	R.GLP(+15.99)GVAGAVGEP(+15.99)GPLG.I	Y	44.20	1378.7091	16	3.3	690.3641	2	46.04				8.7866E6	8.487E6	2.3274E7	1.9886E7	1.7926E7							1.8296E7	1.4984E7	1.4226E7				5.3535E6	6.318E6				3.1894E7	3.0949E7	3.2167E7			7	F7:15228	3849_02.raw	13	0	0	0	1
2	1	P08123|CO1A2_HUMAN	R.GEVGLP(+15.99)GLSGPVGPPGNPGANGLT(+79.97)GAK(+178.05)GAAGLPGVAGAPGLPGPR.G	Y	44.09	4139.0688	45	4.9	1380.7036	3	48.87	3.4898E7	2.8506E7	3.0244E7	2.5738E7	2.6482E7			1.4599E7	2.0311E7	1.8753E7	1.6221E7										2.8416E7	4.169E7				1.0387E7	9.8986E6	9.9202E6			9	F9:16515	4312_01.raw	14	1	1	1	1
2	1	P08123|CO1A2_HUMAN	E.VGAVGPP(+15.99)GFAGEK.G	Y	44.06	1200.6138	13	-3.2	601.3123	2	26.55	3.869E6	1.9954E6	5.5333E6	1.2651E7	2.0934E7	1.009E7	8.0438E6	6.7504E6	1.8938E7	2.1075E7	1.9894E7	3.5161E6	3.6242E6											1.1712E6		3.037E6	6.0627E6	4.2394E6			10	F10:8432	4312_02.raw	17	1	1	1	1
2	1	P08123|CO1A2_HUMAN	T.AGPSGPSGLPGER.G	Y	44.04	1180.5836	13	-2.7	591.2975	2	24.13						3.7943E7	4.0734E7	3.3284E7																							7	F7:7437	3849_02.raw	3	0	0	0	0
2	1	P08123|CO1A2_HUMAN	R.GPQGHQGPAGPP(+15.99)GPP(+15.99)GPP(+15.99)GP(+15.99)PGVSGGGYDFGYDGDFY.R	Y	43.97	3572.5181	37	3.3	1191.8506	3	50.29		4.2404E7			4.7155E7						2.3615E7																	1.5739E7			11	F11:16945	4312_03.raw	4	0	1	0	0
2	1	P08123|CO1A2_HUMAN	G.IP(+15.99)GPVGAAGATGAR.G	Y	43.97	1209.6465	14	0.7	605.8309	2	21.53	1.2528E7	1.2518E7	1.3715E7	6.5614E7	7.0864E7	3.9805E7	3.6724E7	3.482E7	2.7527E7	2.8024E7	2.806E7				2.1415E7			1.8667E7	2.075E7	2.0055E7	7.523E6	1.1832E7	7.2615E6	6.4091E6	6.4545E6	1.9411E7	1.9335E7	1.8732E7	1.6344E7	1.7602E7	5	F5:6481	3484_03_r.raw	25	1	1	1	1
2	1	P08123|CO1A2_HUMAN	T.GHP(+15.99)GTVGPAGIR.G	Y	43.93	1133.5941	12	0.0	378.8720	3	17.09				1.4029E7	1.4666E7	9.8717E6	9.3514E6	8.4159E6										2.8052E6	3.5531E6	3.0402E6											5	F5:4700	3484_03_r.raw	8	0	0	0	1
2	1	P08123|CO1A2_HUMAN	R.GLVGEP(+15.99)GPAGSK(+15.99)GESGNK.G	Y	43.91	1671.8063	18	-0.9	558.2755	3	15.47	1.7354E7		1.4902E7	7.3585E6	6.5049E6	1.4896E7	1.3483E7	1.236E7	2.2481E6	1.4186E6	0											9.1969E6	2.1865E6	0	1.8228E6			1.1877E7			22	F22:4121	5289_03_r.raw	14	1	0	1	1
2	1	P08123|CO1A2_HUMAN	G.LHGEFGLP(+15.99)GPAGPR.G	Y	43.88	1419.7258	14	0.6	474.2495	3	31.82				1.2172E7	1.3642E7			4.1337E6													1.4152E6					3.4716E6		2.8616E6			4	F4:10413	3484_02.raw	6	0	0	0	1
2	1	P08123|CO1A2_HUMAN	S.VGPVGPAGPIGSAGPP(+15.99)GFP(+15.99)GAP(+15.99)GPK.G	Y	43.63	2185.1167	25	2.5	729.3813	3	41.10				1.2648E6					7.2493E6	5.9101E6	6.7325E6																				9	F9:13812	4312_01.raw	4	0	0	0	1
2	1	P08123|CO1A2_HUMAN	E.P(+15.99)GLRGEIGNP(+15.99)GR.D	Y	43.35	1253.6476	12	1.4	418.8904	3	18.89																					3.7281E6	3.2536E6									22	F22:5512	5289_03_r.raw	2	0	0	0	0
2	1	P08123|CO1A2_HUMAN	P.VGPAGAVGPR.G	Y	43.31	879.4926	10	0.3	440.7537	2	18.99		5.953E6	6.2861E6	3.1862E8	3.4611E8	7.6041E8	7.5332E8	6.9102E8	5.0663E7	5.1537E7	5.5405E7	2.358E7	2.3303E7	1.9716E7	2.6103E7	2.5366E7	2.5146E7	5.6421E7	5.7744E7	5.9536E7	1.0654E8	1.5332E8	9.0555E6	7.914E6	8.5853E6	3.1981E8	3.504E8	3.2116E8	4.7096E7	4.4986E7	7	F7:5674	3849_02.raw	30	0	1	1	1
2	1	P08123|CO1A2_HUMAN	R.GASGPAGVR.G	Y	43.28	770.4034	9	1.1	386.2094	2	13.29	3.2177E6	3.324E6	4.6959E6	1.7629E6			3.8128E6	3.4856E6	1.8894E6	2.062E6																8.7836E5					26	F26:3284	6401_01.raw	9	1	1	1	1
2	1	P08123|CO1A2_HUMAN	R.GYPGNIGP(+15.99)VGAAGAP(+15.99)GPHGPVGPAGK.H	Y	43.15	2283.1394	26	2.3	571.7935	4	30.16							2.3576E6																				2.9768E6				27	F27:9728	6401_02.raw	2	0	0	0	0
2	1	P08123|CO1A2_HUMAN	R.GS(+79.97)DGSVGPVGPAGPIGS(+203.08)AGPPGFPGAPGPKGEIGAVGNAGPAGPAGPR.G	Y	43.01	4352.0859	48	1.8	1089.0308	4	43.63	4.0763E7					3.5126E7		3.1386E7																							1	F1:14644	3399_01.raw	3	1	0	0	0
2	1	P08123|CO1A2_HUMAN	G.AAGLP(+15.99)GVAGAP(+15.99)GLP(+15.99)GPR.G	Y	43.01	1504.7997	17	2.7	753.4091	2	34.09				6.3365E6	6.3581E6															1.6969E6											4	F4:11236	3484_02.raw	3	0	0	0	1
2	1	P08123|CO1A2_HUMAN	K.EGLRGPRGDQGPVGR.T	Y	42.93	1549.8073	15	1.3	517.6104	3	16.54																							1.8864E6	2.1667E6							23	F23:4463	6313_01.raw	2	0	0	0	0
2	1	P08123|CO1A2_HUMAN	E.P(+15.99)GNIGFP(+15.99)GPK.G	Y	42.82	1014.5134	10	0.2	508.2640	2	28.16	1.2481E7	1.2169E7	1.2429E7	9.5036E6	8.5682E6	9.8646E6	1.4089E7	1.2875E7	9.7335E6	1.0633E7	6.5573E6	1.5458E6	1.7149E6	1.8634E6		1.1285E6	1.0361E6	1.1739E6	1.2774E6	1.0915E6	7.8361E6	9.9522E6				6.2431E6	8.1873E6	6.9865E6			7	F7:8992	3849_02.raw	24	1	1	1	1
2	1	P08123|CO1A2_HUMAN	R.GAPGP(+15.99)DGNNGAQGP(+15.99)P(+15.99)GPQGVQGGK.G	Y	42.74	2160.9783	24	3.1	721.3356	3	17.05		1.4548E7																			0	1.4142E7									21	F21:4664	5289_01.raw	3	0	2	0	0
2	1	P08123|CO1A2_HUMAN	K.EGPVGLP(+15.99)GIDGRPGPIGP.A	Y	42.73	1699.8893	18	2.1	850.9537	2	48.44						5.3751E6	5.6558E6	5.4237E6																			1.5037E6		1.3019E6		8	F8:15982	3849_03.raw	5	0	0	0	0
2	1	P08123|CO1A2_HUMAN	E.GPVGLP(+15.99)GIDGRP(+15.99)GPIGPAGAR.G	Y	42.64	1942.0383	21	0.4	648.3536	3	37.89						1.1526E7		1.2324E7																		2.9672E7	3.0217E7	2.7562E7			27	F27:12511	6401_02.raw	5	0	0	0	0
2	1	P08123|CO1A2_HUMAN	R.GEVGLP(+15.99)GLSGPVGPPGNPGANGLT(+79.97)GAK(+340.10)GAAGLPGVAGAPGLPGPR.G	Y	42.54	4301.1216	45	4.5	1434.7209	3	48.12	5.4715E7	4.5662E7	2.4236E8	4.0126E7	1.7289E8	2.0973E7	7.7228E7	7.2676E7	2.7915E7	6.9165E7	2.1221E7										1.6846E8	2.0179E8				1.8289E7	1.9999E7	1.8455E7			22	F22:16242	5289_03_r.raw	22	1	1	2	1
2	1	P08123|CO1A2_HUMAN	R.GSDGS(+79.97)VGPVGPAGPIGS(+365.13)AGPPGFPGAPGPKGEIGAVGNAGPAGPAGPR.G	Y	42.54	4514.1392	48	2.9	1129.5453	4	43.22	0	2.1579E6		3.7484E6	4.6099E6	4.0846E6	3.5882E6	0	5.3189E6		6.2623E6																				2	F2:14498	3399_02.raw	7	0	1	0	1
2	1	P08123|CO1A2_HUMAN	R.GPSGPP(+15.99)GP(+15.99)DGNKGEPGVVGAVGTAGPSGPSGLP(+15.99)GER.G	Y	42.31	3212.5332	36	4.9	804.1445	4	33.69							6.1771E6																								7	F7:11019	3849_02.raw	1	0	0	0	0
2	1	P08123|CO1A2_HUMAN	T.GEVGAVGPP(+15.99)GFAGEK.G	Y	42.31	1386.6779	15	1.0	694.3469	2	29.33				6.2993E6	5.6415E6	5.9744E6	5.5555E6	5.5088E6	5.4307E6	6.0764E6	5.4465E6								3.0168E6												10	F10:9491	4312_02.raw	9	0	0	0	1
2	1	P08123|CO1A2_HUMAN	R.TGEVGAVGPP(+15.99)GFAGEKG.P	Y	42.22	1544.7469	17	4.3	773.3840	2	29.97	2.4951E8	2.2249E8	2.4946E8	1.4264E8	1.3378E8	1.454E8	1.4242E8	1.4268E8	2.4449E8		2.6248E8	4.2376E7	4.088E7	3.4131E7						2.6302E7	9.7327E7	1.4481E8	3.2809E7	3.2066E7	3.1821E7			8.258E7			25	F25:9186	6313_03.raw	20	1	1	1	1
2	1	P08123|CO1A2_HUMAN	R.GPSGPQGIR.G	Y	42.10	867.4562	9	-0.5	434.7352	2	15.64	6.1086E8	6.1712E8	6.814E8	4.1785E8	4.19E8	3.6674E8	3.8513E8	3.6476E8	4.1599E8	4.2325E8	4.3028E8	1.1261E8	1.0916E8	9.7861E7	6.6193E7	6.6487E7	6.6699E7	9.2198E7	9.3188E7	9.2017E7	3.7419E8	4.3206E8	4.837E7	5.2225E7	4.679E7	3.05E8	3.3973E8	3.1726E8	5.1087E6	4.6077E6	24	F24:4074	6313_02.raw	30	1	1	1	1
2	1	P08123|CO1A2_HUMAN	E.KGP(+15.99)SGEAGTAGP(+15.99)PGTP(+15.99)GPQGLLGAP(+15.99)GILGLP(+15.99)GSR.G	Y	42.08	3100.5786	34	0.0	1034.5334	3	51.67								0																							8	F8:17051	3849_03.raw	0	0	0	0	0
2	1	P08123|CO1A2_HUMAN	R.GPSGP(+15.99)QGIRGDKGEP(+15.99)GEKGPR.G	Y	42.01	2107.0405	21	0.6	527.7677	4	13.98	1.7385E7	1.5211E7	3.5458E7	2.6699E6	1.9856E6	0	0	0	1.8168E6	2.152E6	2.136E6										6.0829E6	9.186E6	4.2498E6	3.8494E6	3.6262E6	7.8257E6	7.6587E6	6.9417E6			24	F24:3469	6313_02.raw	19	2	1	3	1
2	1	P08123|CO1A2_HUMAN	R.GEVGPAGPNGFAGPAGAAGQP(+15.99)GAK(+15.99)GERG.A	Y	41.84	2465.1682	28	1.7	822.7314	3	28.43	1.3204E7	1.0266E7	1.0462E7			6.3717E6	7.6544E6	6.2906E6			6.2356E6																				7	F7:9057	3849_02.raw	7	1	1	1	0
2	1	P08123|CO1A2_HUMAN	R.GPSGPQGIRGDK(+15.99)GEP(+15.99)GEKGPR.G	Y	41.83	2107.0405	21	1.8	703.3554	3	13.92		6.8354E5																													2	F2:3551	3399_02.raw	1	0	1	0	0
2	1	P08123|CO1A2_HUMAN	A.AGAPGP(+15.99)QGFQGPAGEP(+15.99)GEP(+15.99)GQTGPAGAR.G	Y	41.81	2563.1687	28	0.2	855.3970	3	26.48																												3.6157E6			28	F28:8302	6401_03.raw	1	0	0	0	0
2	1	P08123|CO1A2_HUMAN	K.GEQGP(+15.99)PGPP(+15.99)GFQGLP(+15.99)GPSGPAGEVGK.P	Y	41.74	2418.1450	26	1.6	807.0569	3	39.93		1.1484E7						2.7736E7																		3.0036E7		0			8	F8:13252	3849_03.raw	3	0	1	0	0
2	1	P08123|CO1A2_HUMAN	K.GP(+15.99)SGEAGTAGP(+15.99)PGTP(+15.99)GPQGLLGAP(+15.99)GILGLP(+15.99)GSR.G	Y	41.71	2972.4836	33	-0.9	1487.2478	2	54.00								0	0																						9	F9:18232	4312_01.raw	0	0	0	0	0
2	1	P08123|CO1A2_HUMAN	K.EGPVGLP(+15.99)GIDGRPGPIGPA.G	Y	41.68	1770.9264	19	0.1	886.4706	2	47.77						3.6559E6	3.8108E6	3.8441E6																							6	F6:15925	3849_01.raw	3	0	0	0	0
2	1	P08123|CO1A2_HUMAN	G.SDGS(+79.97)VGPVGPAGPIGS(+203.08)AGPPGFPGAPGPKGEIGAVGNAGPAGPAGPR.G	Y	41.58	4295.0645	47	3.2	1074.7769	4	43.77	2.1527E8	2.1114E8	2.2432E8	3.1272E8	3.1615E8	1.9072E8	1.7819E8	1.8364E8	1.9261E8	1.7898E8	1.7949E8	1.0492E7	1.2034E7	1.155E7	1.3057E7	1.1433E7		1.574E7	1.3605E7	1.9302E7	4.1561E8	4.37E8	2.5649E7	0	2.592E7	0	1.6022E8	1.8714E8			11	F11:14862	4312_03.raw	36	1	2	2	2
2	1	P08123|CO1A2_HUMAN	N.KGEP(+15.99)GVVGAVGTAGPSGPSGLP(+15.99)GER.G	Y	41.55	2264.1396	25	5.4	755.7245	3	30.73																										0					26	F26:9868	6401_01.raw	0	0	0	0	0
2	1	P08123|CO1A2_HUMAN	R.GDQGPVGR.T	Y	41.49	784.3828	8	-0.6	393.1984	2	11.65	1.6095E6	1.6058E6	1.9582E6	9.1539E5	6.9665E5					1.0898E6												1.0596E6				6.7124E5	1.1053E6	9.5732E5			2	F2:2810	3399_02.raw	10	1	1	1	1
2	1	P08123|CO1A2_HUMAN	G.EQGPP(+15.99)GP(+15.99)P(+15.99)GFQGLP(+15.99)GPSGPAGEVGKP(+15.99)GER.G	Y	41.47	2832.3313	29	1.3	945.1189	3	36.30									0																						9	F9:12120	4312_01.raw	0	0	0	0	0
2	1	P08123|CO1A2_HUMAN	R.GLVGEP(+15.99)GPAGSK.G	Y	41.45	1083.5560	12	1.3	542.7860	2	18.11	1.0573E9	9.9274E8	1.0224E9	6.1015E8	6.4086E8	8.3576E8	8.0254E8	7.3664E8	5.9477E8	6.0043E8	6.6886E8	1.4814E8	1.5177E8			1.0086E8		1.3395E8	1.3423E8	1.3691E8	7.0283E8	1.0376E9	1.1941E8	1.0603E8	1.0748E8	5.9994E8	6.1197E8	5.9823E8	3.606E7		23	F23:5159	6313_01.raw	27	1	1	1	1
2	1	P08123|CO1A2_HUMAN	R.DGNPGN(+.98)DGP(+15.99)PGR.D	Y	41.39	1168.4745	12	-0.5	585.2442	2	13.12	0	0								0											1.6462E5										21	F21:3236	5289_01.raw	1	0	0	0	0
2	1	P08123|CO1A2_HUMAN	V.GNAGPAGPAGPR.G	Y	41.37	1020.5100	12	-1.3	511.2616	2	14.93						6.1683E7	0	0																							7	F7:3807	3849_02.raw	1	0	0	0	0
2	1	P08123|CO1A2_HUMAN	R.TGEVGAVGP(+15.99)PGFAGEKGPSGEAGTAGP(+15.99)P(+15.99)GTPGP(+15.99)QGLLGAP(+15.99)GILGLP(+15.99)GSR.G	Y	41.22	4442.1987	49	-3.8	1111.5527	4	55.90									0																						9	F9:18871	4312_01.raw	0	0	0	0	0
2	1	P08123|CO1A2_HUMAN	R.GPQGHQGPAGP(+15.99)PGP(+15.99)P(+15.99)GP(+15.99)PGP(+15.99)PGVSGGGYDFGYDGDFY.R	Y	41.13	3588.5129	37	6.1	1197.1855	3	50.45							0																								7	F7:16720	3849_02.raw	0	0	0	0	0
2	1	P08123|CO1A2_HUMAN	R.GAP(+15.99)GAVGAP(+15.99)GPAGATGDRGEAGAAGPAGP(+15.99)AGPR.G	Y	41.06	2742.3069	33	2.8	686.5859	4	20.32		2.7087E6																													2	F2:6100	3399_02.raw	1	0	1	0	0
2	1	P08123|CO1A2_HUMAN	K.GEP(+15.99)GVVGAVGTAGP(+15.99)SGPSGLPGER.G	Y	41.01	2136.0447	24	2.5	713.0239	3	37.21		1.3325E6																													2	F2:12229	3399_02.raw	1	0	1	0	0
2	1	P08123|CO1A2_HUMAN	R.GEVGPAGPN(+.98)GFAGPAGAAGQP(+15.99)GAK(+178.05)GER.G	Y	41.01	2571.1836	27	1.4	858.0696	3	27.85	2.9093E7	2.2869E7	2.819E7	1.3445E7	1.0124E7	2.0324E7	0	1.6635E7	1.9542E7	1.5915E7	1.9306E7										2.1647E7	2.5098E7					1.1507E7	7.3795E6			1	F1:8991	3399_01.raw	14	1	1	1	1
2	1	P08123|CO1A2_HUMAN	N.AGPAGPAGPR.G	Y	40.87	849.4457	10	-1.6	425.7294	2	14.59						2.3785E7	2.8837E7	2.3978E7	6.6763E5				2.863E6		5.1494E6		3.2423E6														7	F7:3740	3849_02.raw	7	0	0	0	0
2	1	P08123|CO1A2_HUMAN	R.TGEVGAVGP(+15.99)P(+15.99)GFAGEKGP(+15.99)SGEAGTAGPP(+15.99)GTP(+15.99)GP(+15.99)QGLLGAP(+15.99)GILGLP(+15.99)GSR.G	Y	40.78	4474.1885	49	0.2	1119.5546	4	54.39							0																								7	F7:18031	3849_02.raw	0	0	0	0	0
2	1	P08123|CO1A2_HUMAN	R.GPSGPP(+15.99)GPDGNK.G	Y	40.78	1094.4991	12	0.1	548.2569	2	13.60	3.0212E6	2.6411E6	3.6354E6	1.1848E6		2.5147E6	3.3927E6	3.2321E6														1.6084E6					1.9428E6				8	F8:3263	3849_03.raw	9	1	1	1	1
2	1	P08123|CO1A2_HUMAN	R.GSDGS(+79.97)VGPVGPAGPIGS(+203.08)AGPPGFPGAPGPKGEIGAVGN(+.98)AGPAGPAGPR.G	Y	40.47	4353.0703	48	7.0	1089.2825	4	45.66	0	0	0	0		0	0	0	0	0											0	2.9833E7					0	0			7	F7:15133	3849_02.raw	1	0	0	0	0
2	1	P08123|CO1A2_HUMAN	K.GEQGPPGP(+15.99)P(+15.99)GFQGLP(+15.99)GPSGPAGEVGK.P	Y	40.45	2418.1450	26	1.0	807.0564	3	38.77																											3.1256E7				27	F27:12688	6401_02.raw	1	0	0	0	0
2	1	P08123|CO1A2_HUMAN	R.GSDGSVGPVGPAGPIGS(+79.97)AGPPGFPGAPGP(+15.99)K(+114.04)GEIGAVGNAGPAGPAGPR.G	Y	40.32	4279.0444	48	9.3	1427.3687	3	45.28																						1.3078E7									22	F22:15209	5289_03_r.raw	1	0	0	0	0
2	1	P08123|CO1A2_HUMAN	D.GRP(+15.99)GPIGPAGAR.G	Y	40.09	1120.6101	12	0.5	561.3126	2	40.39							3.5022E5																								7	F7:13364	3849_02.raw	1	0	0	0	0
2	1	P08123|CO1A2_HUMAN	K.GPSGEAGTAGP(+15.99)PGTP(+15.99)GPQG.L	Y	40.03	1622.7172	19	-0.5	812.3655	2	18.04								5.799E6																		8.7037E6					26	F26:4981	6401_01.raw	2	0	0	0	0
2	1	P08123|CO1A2_HUMAN	R.GPNGDAGRP(+15.99)GEP(+15.99)GLM(+15.99)GPR.G	Y	40.02	1781.8114	18	1.2	891.9140	2	16.29		3.6995E8	3.9626E8	2.0458E8	2.0329E8		3.0491E8		1.9878E8			7.4403E7					4.1404E7	6.9676E7	7.6025E7	6.6769E7	2.0696E8			3.1373E7		1.8639E8		7.1261E6			28	F28:4411	6401_03.raw	15	0	1	1	1
2	1	P08123|CO1A2_HUMAN	K.GEPGSAGP(+15.99)QGPPGPSGEEGK.R	Y	39.92	1806.8019	20	0.2	603.2747	3	16.59			8.1369E6																												3	F3:4549	3399_03.raw	1	0	0	1	0
2	1	P08123|CO1A2_HUMAN	E.FGLP(+15.99)GP(+15.99)AGPR.G	Y	39.91	999.5137	10	0.5	500.7643	2	27.59	1.8152E6			0			2.4282E6	2.1709E6	3.4565E6	4.297E6	3.0849E6																0				7	F7:8728	3849_02.raw	6	1	0	0	0
2	1	P08123|CO1A2_HUMAN	P.VGLP(+15.99)GIDGRPGP(+15.99)IGPAGAR.G	Y	39.53	1787.9641	19	-0.8	596.9948	3	37.02						3.6408E6		2.8458E6																							8	F8:12088	3849_03.raw	2	0	0	0	0
2	1	P08123|CO1A2_HUMAN	P.NGEAGSAGPP(+15.99)GP(+15.99)PGLR.G	Y	39.46	1464.6957	16	-1.7	733.3539	2	21.23											0					0	9.1684E6	0		3.9782E8							1.318E7			0	27	F27:6201	6401_02.raw	3	0	0	0	0
2	1	P08123|CO1A2_HUMAN	A.GLP(+15.99)GVAGAP(+15.99)GLPGP(+15.99)R.G	Y	39.27	1362.7255	15	1.0	682.3707	2	33.88								3.2624E7																							8	F8:10848	3849_03.raw	1	0	0	0	0
2	1	P08123|CO1A2_HUMAN	G.ISGPP(+15.99)GP(+15.99)P(+15.99)GPAGK.E	Y	39.21	1178.5930	13	-1.0	590.3032	2	15.54							4.2212E6								2.9867E6		3.1003E6										5.4516E6				27	F27:4097	6401_02.raw	4	0	0	0	0
2	1	P08123|CO1A2_HUMAN	K.GPSGEAGTAGP(+15.99)PGTP(+15.99)GPQGLLGAP(+15.99)GIL.G	Y	39.05	2373.1812	27	0.3	792.0679	3	58.38						3.3633E6				8.0833E6	6.6138E6																				6	F6:19472	3849_01.raw	3	0	0	0	0
2	1	P08123|CO1A2_HUMAN	R.GSDGSVGPVGPAGPIGS(+79.97)AGPPGFPGAPGPK(+178.05)GEIGAVGNAGPAGPAGPR.G	Y	39.03	4327.0542	48	9.5	1082.7811	4	46.34	1.242E7		0																												1	F1:15604	3399_01.raw	1	1	0	0	0
2	1	P08123|CO1A2_HUMAN	R.GLP(+15.99)GVAGAVGEP(+15.99)GPLGIAGP(+15.99)PGARG.P	Y	38.99	2171.1333	25	2.9	1086.5770	2	45.94	9.506E7		8.8399E7	5.8462E7		3.3317E7	3.7877E7	3.527E7	1.1371E8	1.0498E8	1.0143E8	9.2655E6	1.0144E7								7.1711E7	8.7636E7	8.8309E6	9.114E6	7.7782E6	4.535E7		3.9958E7			23	F23:14962	6313_01.raw	18	1	0	1	1
2	1	P08123|CO1A2_HUMAN	V.GTAGPSGPSGLPGER.G	Y	38.94	1338.6527	15	3.8	670.3362	2	24.97						3.8983E6	2.76E6	3.0069E6																							8	F8:7688	3849_03.raw	3	0	0	0	0
2	1	P08123|CO1A2_HUMAN	R.AGVM(+15.99)GPP(+15.99)GSR.G	Y	38.71	959.4494	10	0.4	480.7322	2	14.01	3.7056E6	4.7064E6	3.6475E6			7.2215E6	8.1605E6	1.2632E7		1.3767E6				1.2584E6							1.2334E6										7	F7:3529	3849_02.raw	9	1	1	1	0
2	1	P08123|CO1A2_HUMAN	R.GLVGEP(+15.99)GP(+15.99)AGSKGESGNK.G	Y	38.70	1671.8063	18	-0.8	558.2756	3	15.62		1.5104E7																			9.6486E6					1.0172E7	1.1619E7	5.8707E5			21	F21:4104	5289_01.raw	5	0	1	0	0
2	1	P08123|CO1A2_HUMAN	R.TGPP(+15.99)GP(+15.99)SGISGPP(+15.99)GP(+15.99)P(+15.99)GPAGK.E	Y	38.67	1860.8853	21	0.4	621.3026	3	20.97		3.4671E7																													2	F2:6370	3399_02.raw	1	0	1	0	0
2	1	P08123|CO1A2_HUMAN	G.SDGS(+79.97)VGPVGPAGPIGS(+365.13)AGPPGFPGAPGPKGEIGAVGNAGPAGPAGPR.G	Y	38.57	4457.1177	47	1.1	1115.2880	4	44.68	3.2197E7	3.0813E7	2.9355E7	4.7238E7	4.7538E7	2.9237E7	3.2179E7	3.0597E7	2.9438E7	2.8736E7	3.6514E7										4.3842E7	5.1633E7				3.4767E7	3.834E7	2.3038E7			6	F6:14806	3849_01.raw	17	1	1	1	1
2	1	P08123|CO1A2_HUMAN	V.GLGPGP(+15.99)MGLMGP(+15.99)R.G	Y	38.56	1270.6162	13	1.2	636.3162	2	30.44						1.2523E7	1.2251E7	1.1508E7																							7	F7:9735	3849_02.raw	3	0	0	0	0
2	1	P08123|CO1A2_HUMAN	K.GEQGPPGP(+15.99)P(+15.99)GFQGLP(+15.99)GP(+15.99)SGPAGEVGKP(+15.99)GER.G	Y	38.54	2889.3528	30	3.9	964.1287	3	31.91					9.9422E6																										5	F5:10548	3484_03_r.raw	1	0	0	0	0
2	1	P08123|CO1A2_HUMAN	G.KGEQGPPGP(+15.99)P(+15.99)GFQGLP(+15.99)GPSGPAGEVGKP(+15.99)GER.G	Y	38.49	3001.4529	31	5.4	751.3745	4	31.71																						0									22	F22:10381	5289_03_r.raw	0	0	0	0	0
2	1	P08123|CO1A2_HUMAN	P.QGLLGAP(+15.99)GILGLP(+15.99)GSR.G	Y	38.42	1536.8623	16	3.3	769.4410	2	53.76						7.3936E5	9.089E5	9.9292E5																							6	F6:17901	3849_01.raw	4	0	0	0	0
2	1	P08123|CO1A2_HUMAN	A.VGTAGPSGPSGLPGER.G	Y	38.39	1437.7212	16	0.1	719.8679	2	27.12							3.7076E6																								7	F7:8539	3849_02.raw	1	0	0	0	0
2	1	P08123|CO1A2_HUMAN	A.VGN(+.98)AGPAGPAGPR.G	Y	38.29	1120.5625	13	-0.6	561.2882	2	16.74	1.3061E6		1.8532E6		2.7723E6				2.7494E6	3.5513E6																					10	F10:4545	4312_02.raw	5	1	0	1	0
2	1	P08123|CO1A2_HUMAN	K.EGPVGLP(+15.99)GIDGRP(+15.99)GPIGPA.G	Y	38.19	1786.9213	19	2.2	894.4698	2	46.17							6.5843E6	6.0655E6																							8	F8:15297	3849_03.raw	2	0	0	0	0
2	1	P08123|CO1A2_HUMAN	A.VGTAGPSGPSGLP(+15.99)GER.G	Y	38.13	1453.7161	16	2.8	727.8673	2	22.88																				5.7333E6							1.4267E7				20	F20:6817	4484_03.raw	2	0	0	0	0
2	1	P08123|CO1A2_HUMAN	R.GDGGPP(+15.99)GM(+15.99)TGFP(+15.99)GAAGR.T	Y	38.01	1548.6626	17	0.9	775.3392	2	21.12																0														1.5753E7	30	F30:6330	6474_02.raw	1	0	0	0	0
2	1	P08123|CO1A2_HUMAN	K.GEQGP(+15.99)PGP(+15.99)PGFQGLP(+15.99)GP(+15.99)SGPAGEVGKP(+15.99)GER.G	Y	38.01	2889.3528	30	1.9	964.1267	3	31.99																											1.1559E7				27	F27:10528	6401_02.raw	1	0	0	0	0
2	1	P08123|CO1A2_HUMAN	E.VGAVGP(+15.99)PGFAGEKGPSGEAGTAGP(+15.99)PGTP(+15.99)GPQGLLGAP(+15.99)GILGLP(+15.99)GSR.G	Y	37.91	4139.0923	46	1.2	1035.7816	4	54.41																												0			28	F28:18105	6401_03.raw	0	0	0	0	0
2	1	P08123|CO1A2_HUMAN	G.NRGETGPS(+365.13)GPVGPAGAVGPR.G	Y	37.78	2197.0610	20	3.0	550.2742	4	21.90																									3.5421E6						25	F25:6381	6313_03.raw	1	0	0	0	0
2	1	P08123|CO1A2_HUMAN	G.LVGEP(+15.99)GPAGSK.G	Y	37.76	1026.5345	11	3.1	514.2761	2	15.28				3.2528E7	3.4523E7	2.3146E7		2.2235E7							3.5953E6			6.851E6		5.6113E6	3.1917E6					7.0357E6		8.2221E6			5	F5:4004	3484_03_r.raw	10	0	0	0	1
2	1	P08123|CO1A2_HUMAN	K.GPSGEAGTAGP(+15.99)PGTPGP(+15.99)QGLLGAPGILGLP(+15.99)GSR.G	Y	37.75	2940.4939	33	0.1	981.1720	3	56.80			0																												3	F3:19148	3399_03.raw	0	0	0	0	0
2	1	P08123|CO1A2_HUMAN	S.GEAGTAGPPGTP(+15.99)GP(+15.99)QGLLGAP(+15.99)GILGLP(+15.99)GSR.G	Y	37.72	2715.3826	30	3.9	906.1383	3	54.43										2.8488E6																					10	F10:18387	4312_02.raw	1	0	0	0	0
2	1	P08123|CO1A2_HUMAN	G.AP(+15.99)GAVGAP(+15.99)GPAGATGDR.G	Y	37.58	1452.6957	17	-3.4	727.3527	2	16.06				1.2654E6																											4	F4:4376	3484_02.raw	1	0	0	0	1
2	1	P08123|CO1A2_HUMAN	R.GLP(+15.99)GVAGAVGEP(+15.99)GPLGIAGPP(+15.99)GARG.P	Y	37.57	2171.1333	25	0.8	1086.5748	2	46.01	9.506E7	8.5946E7			6.043E7																						4.2026E7				2	F2:15304	3399_02.raw	4	1	1	0	0
2	1	P08123|CO1A2_HUMAN	R.GPP(+15.99)GAAGAP(+15.99)GPQGF.Q	Y	37.54	1211.5570	14	-4.5	606.7831	2	28.63					0																	0					2.2508E6				27	F27:9166	6401_02.raw	1	0	0	0	0
2	1	P08123|CO1A2_HUMAN	G.KEGPVGLP(+15.99)GIDGRP(+15.99)GPIGPAGAR.G	Y	37.51	2199.1758	23	2.4	550.8026	4	34.54	0																				0	5.0516E6					0				21	F21:11128	5289_01.raw	1	0	0	0	0
2	1	P08123|CO1A2_HUMAN	R.GEVGPAGPN(+.98)GF.A	Y	37.49	1001.4454	11	0.5	501.7302	2	38.33						2.9495E6	2.6956E6	2.6877E6																							8	F8:12594	3849_03.raw	3	0	0	0	0
2	1	P08123|CO1A2_HUMAN	R.GERGP(+15.99)P(+15.99)GESGAAGPTGPIGSR.G	Y	37.45	1937.9191	21	3.5	646.9825	3	18.17	1.3373E7	1.2003E7																				1.5029E7	5.7296E6		5.2462E6						25	F25:5019	6313_03.raw	5	1	1	0	0
2	1	P08123|CO1A2_HUMAN	P.SGPPGPDGNKGEPGVVGAVGT(+203.08)AGPSGPSGLP(+15.99)GER.G	Y	37.44	3229.5486	34	-3.9	808.3913	4	32.15				0																											4	F4:10547	3484_02.raw	0	0	0	0	0
2	1	P08123|CO1A2_HUMAN	G.EQGP(+15.99)P(+15.99)GPP(+15.99)GFQGLP(+15.99)GPSGPAGEVGK.P	Y	37.41	2377.1184	25	3.4	793.3828	3	39.43										6.6976E6	0																				11	F11:13342	4312_03.raw	1	0	0	0	0
2	1	P08123|CO1A2_HUMAN	P.SGPQGIRGDK(+15.99)GEP(+15.99)GEKGPR.G	Y	37.38	1952.9663	19	3.0	489.2503	4	13.48																										5.6399E5	4.4988E5	3.3877E5			26	F26:3317	6401_01.raw	3	0	0	0	0
2	1	P08123|CO1A2_HUMAN	N.GEAGSAGPP(+15.99)GPP(+15.99)GLR.G	Y	37.38	1350.6527	15	-1.2	676.3328	2	21.06																											0				27	F27:6266	6401_02.raw	0	0	0	0	0
2	1	P08123|CO1A2_HUMAN	V.GEP(+15.99)GPLGIAGPP(+15.99)GAR.G	Y	37.21	1376.7047	15	0.1	689.3597	2	46.18		7.6254E5																				1.5686E6									2	F2:15473	3399_02.raw	2	0	1	0	0
2	1	P08123|CO1A2_HUMAN	R.GAP(+15.99)GAVGAP(+15.99)GPAGATGDRG.E	Y	37.11	1566.7385	19	0.5	784.3770	2	16.32	5.5194E7	5.2051E7	5.3544E7										1.2008E7	1.0904E7									7.2867E6	4.6233E6			3.2602E7	2.8498E7			23	F23:4415	6313_01.raw	9	1	1	1	0
2	1	P08123|CO1A2_HUMAN	R.GEVGPAGPNGFAGPA.G	Y	37.07	1296.6099	15	-2.9	649.3103	2	36.74							1.2227E6																								7	F7:12128	3849_02.raw	1	0	0	0	0
2	1	P08123|CO1A2_HUMAN	R.GPSGP(+15.99)QGIRGDKGEP(+15.99)GEK.G	Y	37.00	1796.8652	18	-0.3	450.2234	4	13.75	3.6395E6	1.9686E7			5.4024E6	6.8892E6															1.0855E7	1.4749E7				1.0858E7		1.0345E7			28	F28:3435	6401_03.raw	10	1	2	0	0
2	1	P08123|CO1A2_HUMAN	K.GAAGLP(+15.99)GVAGAPGLP(+15.99)GP(+15.99)R.G	Y	36.99	1561.8212	18	1.6	781.9191	2	35.60																	6.2956E7				0		8.0012E7								17	F17:12139	4406_03.raw	2	0	0	0	0
2	1	P08123|CO1A2_HUMAN	G.AVGEP(+15.99)GPLGIAGPP(+15.99)GAR.G	Y	36.87	1546.8103	17	-1.0	774.4116	2	34.26				1.9166E6																											4	F4:11367	3484_02.raw	1	0	0	0	1
2	1	P08123|CO1A2_HUMAN	R.GEVGLP(+15.99)GLSGPVGP(+15.99)PGN(+.98)PGANGLTGAK.G	Y	36.67	2402.2078	27	9.9	801.7511	3	45.15	2.5953E6									1.7054E6												4.8785E6									22	F22:15193	5289_03_r.raw	3	1	0	0	0
2	1	P08123|CO1A2_HUMAN	E.TGPSGPVGPAGAVGPR.G	Y	36.64	1375.7207	16	2.0	688.8690	2	25.17	6.459E6	6.1626E6	7.2017E6	9.3563E6	8.9462E6	4.306E6	4.1442E6	4.6782E6	7.9841E6	8.7991E6	8.6849E6										3.6664E6					5.1933E6	4.7748E6	4.393E6			11	F11:7937	4312_03.raw	15	1	1	1	1
2	1	P08123|CO1A2_HUMAN	K.GPSGEAGTAGPPGT(+365.13)PGPQGLLGAPGILGLP.G	Y	36.57	2957.4868	30	0.5	1479.7515	2	56.82								5.5001E5																							8	F8:18775	3849_03.raw	1	0	0	0	0
2	1	P08123|CO1A2_HUMAN	E.VGAVGPP(+15.99)GFAGEKGP(+15.99)SGEAGTAGPP(+15.99)GTP(+15.99)GPQGLLGAP(+15.99)GILGLP(+15.99)GSR.G	Y	36.54	4155.0869	46	-5.7	1039.7731	4	54.03				0	0				0																						5	F5:18142	3484_03_r.raw	0	0	0	0	0
2	1	P08123|CO1A2_HUMAN	N.RGETGPSGPVGPAGAVGPR.G	Y	36.46	1717.8859	19	0.4	573.6361	3	22.82	3.8842E7	3.6527E7	4.1846E7		1.5059E7				2.386E7	2.5534E7	2.4102E7										2.3858E7	3.3111E7				1.187E7		1.1214E7			22	F22:6987	5289_03_r.raw	11	1	1	1	0
2	1	P08123|CO1A2_HUMAN	R.GPQGHQGPAGPP(+15.99)GP(+15.99)P(+15.99)GPP(+15.99)GPP(+15.99)GVSGGGYDFGYDGDFY.R	Y	36.41	3588.5129	37	2.4	1197.1812	3	49.36				1.4475E7	0																1.1281E6										4	F4:16688	3484_02.raw	2	0	0	0	1
2	1	P08123|CO1A2_HUMAN	H.GEFGLP(+15.99)GPAGPR.G	Y	36.39	1169.5829	12	-3.2	585.7969	2	36.17			2.3057E6	1.8206E6			0	1.0033E6																							8	F8:11754	3849_03.raw	3	0	0	1	1
2	1	P08123|CO1A2_HUMAN	E.PGS(+203.08)AGPQGPP(+15.99)GPSGEEGK.R	Y	36.24	1823.8173	18	2.0	608.9476	3	15.13																												0			28	F28:3955	6401_03.raw	0	0	0	0	0
2	1	P08123|CO1A2_HUMAN	R.TGP(+15.99)PGPSGISGPP(+15.99)GPP(+15.99)GPAGK.E	Y	36.22	1828.8954	21	-8.3	610.6340	3	18.93					1.5972E7	2.0742E7										1.3225E7															16	F16:5321	4406_02.raw	3	0	0	0	0
2	1	P08123|CO1A2_HUMAN	K.EGP(+15.99)VGLPGIDGRPGPIGPAGAR.G	Y	36.17	2055.0859	22	1.2	1028.5515	2	40.80			1.9779E7																							1.0153E7					26	F26:13576	6401_01.raw	2	0	0	1	0
2	1	P08123|CO1A2_HUMAN	R.GASGPAGVRGPNGDAGRP(+15.99)GEP(+15.99)GLMGP(+15.99)R.G	Y	35.96	2534.2043	27	0.4	634.5586	4	20.66	3.2957E7	2.7811E7												0									1.6308E7		1.5481E7						2	F2:6136	3399_02.raw	4	1	1	0	0
2	1	P08123|CO1A2_HUMAN	G.ISGP(+15.99)P(+15.99)GP(+15.99)P(+15.99)GPAGK.E	Y	35.91	1194.5879	13	1.4	598.3021	2	14.79						3.2687E7	3.5617E7								1.5361E7	0	0														16	F16:3692	4406_02.raw	3	0	0	0	0
2	1	P08123|CO1A2_HUMAN	G.HP(+15.99)GTVGPAGIR.G	Y	35.88	1076.5726	11	-0.3	359.8647	3	17.03				0	6.3057E6				0																						5	F5:4711	3484_03_r.raw	1	0	0	0	0
2	1	P08123|CO1A2_HUMAN	R.GAP(+15.99)GPDGNNGAQGP(+15.99)P(+15.99)GPQGVQGGK.G	Y	35.79	2160.9783	24	-3.5	721.3308	3	15.66			4.5118E6								5.566E6																6.0597E6				11	F11:4166	4312_03.raw	3	0	0	1	0
2	1	P08123|CO1A2_HUMAN	G.AAGAPGP(+15.99)HGPVGPAGK.H	Y	35.76	1355.6945	16	2.2	452.9064	3	15.14																										2.1882E6	1.4253E6				26	F26:3940	6401_01.raw	2	0	0	0	0
2	1	P08123|CO1A2_HUMAN	R.GAPGP(+15.99)DGNNGAQGPP(+15.99)GP(+15.99)QGVQGGK.G	Y	35.67	2160.9783	24	0.7	721.3339	3	16.81		9.2895E6	1.1013E7			3.7211E6					6.6734E6										4.4859E6	1.4142E7						6.192E6			3	F3:4690	3399_03.raw	7	0	1	1	0
2	1	P08123|CO1A2_HUMAN	G.ETGPSGPVGPAGAVGPR.G	Y	35.57	1504.7633	17	1.9	753.3904	2	26.05					1.3568E6																										5	F5:8262	3484_03_r.raw	1	0	0	0	0
2	1	P08123|CO1A2_HUMAN	R.GSDGSVGPVGPAGPIGSAGPP(+15.99)GFPGAPGPK(+178.05)GEIGAVGNAGPAGPAGPR.G	Y	35.50	4263.0830	48	3.6	1066.7819	4	46.58		0																			0										21	F21:15322	5289_01.raw	0	0	0	0	0
2	1	P08123|CO1A2_HUMAN	G.FP(+15.99)GTP(+15.99)GLP(+15.99)GFK.G	Y	35.49	1164.5814	11	-1.0	583.2974	2	39.09				1.4805E6			1.7156E6																								7	F7:12925	3849_02.raw	2	0	0	0	1
2	1	P08123|CO1A2_HUMAN	R.GLVGEPGP(+15.99)AGSK.G	Y	35.39	1083.5560	12	2.0	542.7864	2	18.21																											6.1197E8				27	F27:5304	6401_02.raw	1	0	0	0	0
2	1	P08123|CO1A2_HUMAN	R.GAAGIP(+15.99)GGK.G	Y	35.13	742.3973	9	-0.4	372.2058	2	13.18	1.1719E7	1.0479E7	9.0968E6				1.8998E6	2.5291E6																							3	F3:3283	3399_03.raw	5	1	1	1	0
2	1	P08123|CO1A2_HUMAN	R.GPSGP(+15.99)QGIRGDKGEP(+15.99)GEKGP(+15.99)R.G	Y	35.10	2123.0354	21	2.7	708.6876	3	13.85	4.8523E7	4.4241E7	5.0131E7				1.3309E6	1.3473E6	3.9444E6		4.2456E6										1.9439E7	1.4421E6			4.9453E6	1.0428E6	1.1943E6	1.9241E7			22	F22:3515	5289_03_r.raw	17	2	2	2	0
2	1	P08123|CO1A2_HUMAN	R.GPQGHQGPAGP(+15.99)PGPP(+15.99)GPP(+15.99)GPP(+15.99)GVSGGGYDFGYDGDFY.R	Y	35.07	3572.5181	37	-0.8	1191.8457	3	51.44								2.4964E7																							8	F8:16805	3849_03.raw	1	0	0	0	0
2	1	P08123|CO1A2_HUMAN	R.GERGLP(+15.99)GVAGAVGEP(+15.99)GPLGIAGPP(+15.99)GAR.G	Y	34.89	2456.2771	27	3.2	819.7689	3	41.96	3.253E6	2.6449E6	2.8629E6																			1.9522E6									3	F3:14150	3399_03.raw	4	1	1	1	0
2	1	P08123|CO1A2_HUMAN	R.TGEVGAVGP(+15.99)PGFAGEKGP(+15.99)SGEAGTAGP(+15.99)PGTP(+15.99)GPQGLLGAP(+15.99)GILGLP(+15.99)GSRG.E	Y	34.66	4499.2202	50	-4.4	1125.8074	4	61.34			5.2605E5																												3	F3:20650	3399_03.raw	1	0	0	1	0
2	1	P08123|CO1A2_HUMAN	K.GEP(+15.99)GLRGEIGN(+.98)P(+15.99)GR.D	Y	34.65	1440.6957	14	1.8	481.2400	3	19.73	0	0					0														1.253E7							0			1	F1:5847	3399_01.raw	1	0	0	0	0
2	1	P08123|CO1A2_HUMAN	R.GPSGPQGIRGDK.G	Y	34.60	1167.5996	12	7.9	390.2102	3	15.00						1.9292E8	6.041E7	1.2597E8				2.9017E6	1.4046E6	1.7098E7																	8	F8:3685	3849_03.raw	8	0	0	0	0
2	1	P08123|CO1A2_HUMAN	R.GPNGEAGSAGPP(+15.99)GP(+15.99)P(+15.99)GLR.G	Y	34.56	1634.7648	18	1.6	818.3910	2	18.33										3.2566E6	3.7456E6											1.369E6									11	F11:5388	4312_03.raw	3	0	0	0	0
2	1	P08123|CO1A2_HUMAN	R.GLVGEP(+15.99)GPAGSK(+15.99).G	Y	34.45	1099.5509	12	0.1	550.7828	2	18.05							8.1581E7			8.5521E7												1.0599E8									10	F10:5070	4312_02.raw	3	0	0	0	0
2	1	P08123|CO1A2_HUMAN	E.AGSAGPP(+15.99)GP(+15.99)PGLR.G	Y	34.34	1164.5886	13	-0.1	583.3015	2	20.97												4.0882E6	4.0861E6							4.9612E6											13	F13:6098	4371_02.raw	3	0	0	0	0
2	1	P08123|CO1A2_HUMAN	R.GPQGHQGPAGP(+15.99)PGP(+15.99)PGP(+15.99)P(+15.99)GP(+15.99)PGVSGGGYDFGYDGDFY.R	Y	34.08	3588.5129	37	6.7	1197.1863	3	50.24						0																									6	F6:16722	3849_01.raw	0	0	0	0	0
2	1	P08123|CO1A2_HUMAN	S.GISGPP(+15.99)GPP(+15.99)GPAGK.E	Y	34.08	1219.6196	14	2.4	610.8185	2	18.64						2.6306E6		2.9448E6							2.2062E6	2.441E6	2.1901E6														8	F8:5127	3849_03.raw	5	0	0	0	0
2	1	P08123|CO1A2_HUMAN	P.GPK(+340.10)GEIGAVGNAGPAGPAGPR.G	Y	33.92	2169.0549	21	-2.9	1085.5316	2	46.53							0																								7	F7:15423	3849_02.raw	0	0	0	0	0
2	1	P08123|CO1A2_HUMAN	G.APGAVGAPGPAGAT(+203.08)GDRGEAGAAGPAGPAGPR.G	Y	33.79	2840.3801	32	-6.9	711.0974	4	25.41		2.9329E7	2.9147E7			3.5111E7				1.4216E7	1.314E7		1.7784E7									1.1376E7	7.8791E6	6.7054E6	6.9272E6			2.846E7			25	F25:7699	6313_03.raw	12	0	1	1	0
2	1	P08123|CO1A2_HUMAN	G.EP(+15.99)GNIGFP(+15.99)GPK.G	Y	33.72	1143.5559	11	0.9	572.7858	2	28.31				5.5089E6	5.5222E6	0	6.2591E6	6.7575E6																							8	F8:8905	3849_03.raw	4	0	0	0	1
2	1	P08123|CO1A2_HUMAN	R.GPSGP(+15.99)PGP(+15.99)DGNKGEP(+15.99)GVVGAVGTAGPSGPSGLPGER.G	Y	33.64	3212.5332	36	2.1	1071.8539	3	34.32	4.1622E6		4.1699E6																		3.8766E6										21	F21:11090	5289_01.raw	3	1	0	1	0
2	1	P08123|CO1A2_HUMAN	P.SGPSGLP(+15.99)GER.G	Y	33.57	971.4672	10	-0.3	486.7407	2	16.17				1.4256E7	1.4664E7	7.3574E7	6.8201E7	6.6682E7										3.0881E6	2.0123E6		2.2524E6					1.1284E7	1.2048E7	1.1372E7	1.0179E7		4	F4:4445	3484_02.raw	12	0	0	0	1
2	1	P08123|CO1A2_HUMAN	R.GHNGLDGLK(+15.99)GQP(+15.99)GAPGVKGEPGAPGENGT(+79.97)PGQTGAR.G	Y	33.47	3446.5962	36	4.2	862.6599	4	19.19		7.3003E6																										6.4944E6			2	F2:5636	3399_02.raw	2	0	1	0	0
2	1	P08123|CO1A2_HUMAN	R.GPQGHQGPAGPP(+15.99)GP(+15.99)PGPP(+15.99)GP(+15.99)PGVSGGGYDFGYDGDFY.R	Y	33.43	3572.5181	37	1.4	1191.8483	3	50.22									2.4112E7																						9	F9:16720	4312_01.raw	1	0	0	0	0
2	1	P08123|CO1A2_HUMAN	R.GEVGLP(+15.99)GLSGPVGPP(+15.99)GN.P	Y	33.37	1534.7627	17	-1.4	768.3875	2	45.08																												5.2571E5			28	F28:14957	6401_03.raw	1	0	0	0	0
2	1	P08123|CO1A2_HUMAN	F.GLP(+15.99)GPAGPR.G	Y	33.32	836.4504	9	0.2	419.2325	2	18.36						1.1011E7	1.0643E7	1.0182E7	3.4253E6	3.4055E6	4.2102E6										7.6693E5										6	F6:5212	3849_01.raw	7	0	0	0	0
2	1	P08123|CO1A2_HUMAN	K.EGPVGLP(+15.99)GIDGRPGP(+15.99)IGPA.G	Y	33.23	1786.9213	19	2.2	894.4698	2	46.17								6.0655E6																							8	F8:15213	3849_03.raw	1	0	0	0	0
2	1	P08123|CO1A2_HUMAN	K.GPSGEAGTAGPPGT(+203.08)PGPQGLLGAP(+15.99)GILGLP(+15.99)GSR.G	Y	33.15	3127.5784	33	-6.7	1043.5264	3	58.01	1.4467E6	1.4233E6	0						0																						9	F9:19571	4312_01.raw	2	1	1	0	0
2	1	P08123|CO1A2_HUMAN	K.GEQGP(+15.99)P(+15.99)GPP(+15.99)GFQGLP(+15.99)GPSGPAGEVGK.P	Y	33.14	2434.1399	26	1.6	812.3885	3	39.06						2.7743E6	2.1418E6																								6	F6:12947	3849_01.raw	2	0	0	0	0
2	1	P08123|CO1A2_HUMAN	K.GEQGPP(+15.99)GPP(+15.99)GFQGLP(+15.99)GP.S	Y	33.10	1635.7528	17	2.5	818.8857	2	43.55						1.2547E7	1.0063E7	1.1222E7																							6	F6:14496	3849_01.raw	3	0	0	0	0
2	1	P08123|CO1A2_HUMAN	R.GLP(+15.99)GADGR.A	Y	33.08	757.3718	8	0.4	379.6933	2	14.87						1.7723E8	1.9492E8								2.7481E7	2.2692E7				5.6204E6	9.9271E6										6	F6:3983	3849_01.raw	6	0	0	0	0
2	1	P08123|CO1A2_HUMAN	S.GISGPP(+15.99)GPPGP(+15.99)AGK.E	Y	32.81	1219.6196	14	1.5	610.8180	2	18.69							3.7197E6																								7	F7:5236	3849_02.raw	1	0	0	0	0
2	1	P08123|CO1A2_HUMAN	A.TGDRGEAGAAGPAGPAGPR.G	Y	32.53	1663.8026	19	-1.5	555.6073	3	15.92							3.5258E6	5.4946E6																							7	F7:4215	3849_02.raw	2	0	0	0	0
2	1	P08123|CO1A2_HUMAN	E.VGPAGPNGFAGPAGAAGQP(+15.99)GAK(+15.99).G	Y	32.35	1879.9176	22	-0.4	940.9657	2	28.44			1.0782E6							2.5565E6																					10	F10:9135	4312_02.raw	2	0	0	1	0
2	1	P08123|CO1A2_HUMAN	V.GLGPGPM(+15.99)GLM(+15.99)GPR.G	Y	32.34	1270.6162	13	1.2	636.3162	2	30.40								1.1508E7																							8	F8:9640	3849_03.raw	1	0	0	0	0
2	1	P08123|CO1A2_HUMAN	G.PAGAVGPR.G	Y	32.24	723.4027	8	-1.1	362.7082	2	19.02							0																								7	F7:5448	3849_02.raw	0	0	0	0	0
2	1	P08123|CO1A2_HUMAN	P.NGDAGRP(+15.99)GEP(+15.99)GLMGP(+15.99)R.G	Y	32.24	1627.7372	16	1.1	543.5869	3	15.64				1.202E7	1.085E7	4.3206E7	4.6316E7	4.2251E7													3.4096E6	3.9927E6				1.1424E7					4	F4:4175	3484_02.raw	8	0	0	0	1
2	1	P08123|CO1A2_HUMAN	R.TGP(+15.99)P(+15.99)GPSGISGPP(+15.99)GPP(+15.99)GP.A	Y	32.11	1588.7368	18	-0.1	795.3756	2	29.41							3.7692E6	3.0052E6																							7	F7:9420	3849_02.raw	2	0	0	0	0
2	1	P08123|CO1A2_HUMAN	R.DGN(+.98)PGNDGPP(+15.99)GR.D	Y	32.08	1168.4745	12	3.5	585.2466	2	13.70						1.1038E6																									6	F6:3305	3849_01.raw	1	0	0	0	0
2	1	P08123|CO1A2_HUMAN	K.EGPVGLP(+15.99)GIDGRP(+15.99)GPIGP.A	Y	32.00	1715.8842	18	-0.3	858.9491	2	46.87								5.7957E6																							8	F8:15443	3849_03.raw	1	0	0	0	0
2	1	P08123|CO1A2_HUMAN	E.VGLPGLS(+203.08)GPVGPP(+15.99)GNPGANGLTGAK.G	Y	31.98	2402.2441	25	-4.4	801.7518	3	45.30											1.4009E6																				11	F11:15384	4312_03.raw	1	0	0	0	0
2	1	P08123|CO1A2_HUMAN	R.GPSGPPGP(+15.99)DGN(+.98)KGEP(+15.99)GVVGAVGTAGPSGPSGLPGER.G	Y	31.98	3197.5225	36	5.1	800.3920	4	35.12																						0									22	F22:11643	5289_03_r.raw	0	0	0	0	0
2	1	P08123|CO1A2_HUMAN	P.SGEAGTAGPPGT(+203.08)PGPQGLLGAPGILGLP(+15.99)GSR.G	Y	31.90	2957.5093	31	-7.1	1479.7515	2	56.82								5.5001E5																							8	F8:18698	3849_03.raw	1	0	0	0	0
2	1	P08123|CO1A2_HUMAN	P.AGKEGPVGLP(+15.99)GIDGRP(+15.99)GPIGPAGAR.G	Y	31.77	2327.2344	25	-7.6	776.7462	3	39.01		2.0938E7																			1.5925E7	2.7346E7									21	F21:12700	5289_01.raw	3	0	1	0	0
2	1	P08123|CO1A2_HUMAN	R.GEVGPAGPNGF.A	Y	31.76	1000.4614	11	0.6	501.2383	2	35.60						9.4538E6																									6	F6:11679	3849_01.raw	1	0	0	0	0
2	1	P08123|CO1A2_HUMAN	R.GSDGSVGPVGPAGPIGSAGP(+15.99)PGFPGAPGPK(+340.10)GEIGAVGNAGPAGPAGPR.G	Y	31.76	4425.1357	48	1.6	1107.2930	4	46.43		2.8702E6																													2	F2:15567	3399_02.raw	1	0	1	0	0
2	1	P08123|CO1A2_HUMAN	A.RGAP(+15.99)GAVGAP(+15.99)GPAGATGDRGEAGAAGPAGPAGPR.G	Y	31.65	2882.4131	34	0.1	721.6106	4	20.04																					0										21	F21:5797	5289_01.raw	0	0	0	0	0
2	1	P08123|CO1A2_HUMAN	R.GPQGHQGPAGP(+15.99)PGP(+15.99)P(+15.99)GPP(+15.99)GP(+15.99)PGVSGGGYDFGYDGDFY.R	Y	31.54	3588.5129	37	4.8	1197.1840	3	50.63						0																									6	F6:16851	3849_01.raw	0	0	0	0	0
2	1	P08123|CO1A2_HUMAN	R.GPP(+15.99)GESGAAGPTGPIGSRG.P	Y	31.46	1636.7804	19	1.9	819.3990	2	21.27																							1.704E7		1.6065E7						23	F23:6279	6313_01.raw	2	0	0	0	0
2	1	P08123|CO1A2_HUMAN	G.PP(+15.99)GPP(+15.99)GPAGK.E	N	31.42	905.4606	10	4.4	453.7396	2	19.69					5.9382E5																										5	F5:5710	3484_03_r.raw	1	0	0	0	0
2	1	P08123|CO1A2_HUMAN	E.P(+15.99)GPLGIAGP(+15.99)PGAR.G	Y	31.21	1190.6406	13	-5.7	596.3242	2	47.50																4.709E5															16	F16:16200	4406_02.raw	1	0	0	0	0
2	1	P08123|CO1A2_HUMAN	A.AGPTGPIGSR.G	Y	31.12	911.4824	10	-1.0	456.7480	2	17.14				2.6609E7	2.8772E7				3.8672E7	3.8039E7						6.2389E6															5	F5:4786	3484_03_r.raw	5	0	0	0	1
2	1	P08123|CO1A2_HUMAN	R.GHN(+.98)GLDGLK(+15.99).G	Y	31.09	926.4457	9	-0.6	464.2299	2	19.14							3.4249E6		5.7394E6	5.4205E6																					7	F7:5473	3849_02.raw	3	0	0	0	0
2	1	P08123|CO1A2_HUMAN	R.GSP(+15.99)GSRGLP(+15.99)GADGR.A	Y	30.91	1314.6276	14	0.5	439.2167	3	14.16		2.7177E6																			1.6858E6	2.2109E6									2	F2:3590	3399_02.raw	3	0	1	0	0
2	1	P08123|CO1A2_HUMAN	K.EGPVGLP(+15.99)GIDGRPGPIGP(+15.99)A.G	Y	30.83	1786.9213	19	2.5	894.4702	2	46.18						8.2367E6	6.5843E6																								6	F6:15400	3849_01.raw	2	0	0	0	0
2	1	P08123|CO1A2_HUMAN	L.GAP(+15.99)GILGLP(+15.99)GSR.G	Y	30.80	1125.6141	12	-3.2	563.8126	2	36.51						9.715E6	1.2557E7								4.0114E7		3.4232E7														7	F7:11897	3849_02.raw	4	0	0	0	0
2	1	P08123|CO1A2_HUMAN	E.SGAAGPTGPIGSR.G	Y	30.79	1126.5730	13	0.7	564.2942	2	18.38									5.3377E6		6.5369E6										3.2614E6										11	F11:5347	4312_03.raw	3	0	0	0	0
2	1	P08123|CO1A2_HUMAN	R.GPQGHQGPAGPP(+15.99)GP(+15.99)PGP(+15.99)P(+15.99)GPP(+15.99)GVSGGGYDFGYDGDFY.R	Y	30.72	3588.5129	37	4.9	1197.1841	3	49.60	0																														1	F1:16729	3399_01.raw	0	0	0	0	0
2	1	P08123|CO1A2_HUMAN	N.KGEP(+15.99)GSAGPQGPP(+15.99)GPSGEEGK.R	Y	30.71	1950.8918	21	-1.7	651.3035	3	14.28					1.2095E6																										5	F5:3662	3484_03_r.raw	1	0	0	0	0
2	1	P08123|CO1A2_HUMAN	K.EGPVGLP(+15.99)GIDGRP(+15.99)GP.I	Y	30.70	1448.7258	15	3.2	725.3725	2	39.06						1.0035E6																									6	F6:12959	3849_01.raw	1	0	0	0	0
2	1	P08123|CO1A2_HUMAN	S.GEAGTAGP(+15.99)PGTP(+15.99)GPQGLLGAP(+15.99)GILGLP(+15.99)GSR.G	Y	30.63	2715.3826	30	2.5	906.1371	3	54.32					7.1483E5						1.933E6																				5	F5:18187	3484_03_r.raw	2	0	0	0	0
2	1	P08123|CO1A2_HUMAN	R.GAPGAVGAP(+15.99)GPAGATGDRGEAGAAGPAGPAGPR.G	Y	30.41	2710.3169	33	-5.3	904.4415	3	23.53	0																														1	F1:7344	3399_01.raw	0	0	0	0	0
2	1	P08123|CO1A2_HUMAN	R.GEVGPAGPNGFAGPAGAAGQP(+15.99)GAK(+15.99)G.E	Y	30.29	2123.0032	25	-0.1	1062.5088	2	29.73		1.3913E7	1.5025E7																												3	F3:9668	3399_03.raw	2	0	1	1	0
2	1	P08123|CO1A2_HUMAN	R.GYP(+15.99)GNIGPVGAAGAPGPHGPVGPAGK.H	Y	30.26	2267.1445	26	2.6	756.7241	3	31.82											1.9172E6											3.761E6									11	F11:10555	4312_03.raw	2	0	0	0	0
2	1	P08123|CO1A2_HUMAN	K.GEP(+15.99)GVVGAVGT.A	Y	30.24	957.4767	11	1.1	479.7462	2	27.12							4.4407E7	4.1743E7																							7	F7:8527	3849_02.raw	2	0	0	0	0
2	1	P08123|CO1A2_HUMAN	D.PGK(+340.10)N(+.98)GDKGHAGLAGAR.G	Y	30.02	1845.8704	16	3.3	462.4764	4	15.34													4.2066E6								1.3261E6										13	F13:3973	4371_02.raw	2	0	0	0	0
2	1	P08123|CO1A2_HUMAN	K.GPSGEAGTAGPPGT(+365.13)PGPQGLLGAPGILGLP(+15.99)GSR.G	Y	29.93	3273.6365	33	-8.5	1092.2102	3	53.99																						0									22	F22:18198	5289_03_r.raw	0	0	0	0	0
2	1	P08123|CO1A2_HUMAN	G.S(+79.97)DGSVGPVGPAGPIGS(+203.08)AGPPGFPGAPGPKGEIGAVGNAGPAGPAGPR.G	Y	29.93	4295.0645	47	5.7	1074.7795	4	44.12			2.0491E8																1.3605E7											4.9812E6	19	F19:14696	4484_02.raw	3	0	0	1	0
2	1	P08123|CO1A2_HUMAN	R.GEIGNP(+15.99)GR.D	Y	29.93	814.3933	8	-0.5	408.2037	2	9.73	9.8214E5		1.2375E6		4.6196E5	2.5899E5	4.4793E5		5.9872E5	7.2204E5																					3	F3:2338	3399_03.raw	7	1	0	1	0
2	1	P08123|CO1A2_HUMAN	K.GHNGLQGLP(+15.99)GIAGHHGDQGAP(+15.99)GSVGPAGPRG.P	Y	29.93	2856.3762	31	2.0	715.1028	4	27.86			2.6789E7		4.2087E7	2.588E7			4.8678E7																	2.5002E7	2.1835E7				3	F3:8994	3399_03.raw	6	0	0	1	0
2	1	P08123|CO1A2_HUMAN	K.GEQGP(+15.99)P(+15.99)GP(+15.99)PGFQGLP(+15.99)GPSGPAGEVGK.P	Y	29.67	2434.1399	26	3.9	812.3904	3	39.87							0																								7	F7:13164	3849_02.raw	0	0	0	0	0
2	1	P08123|CO1A2_HUMAN	R.GASGPAGVRGPNGDAGRP(+15.99)GEP(+15.99)GLM(+15.99)GPR.G	Y	29.62	2534.2043	27	-0.6	634.5580	4	20.85			3.1601E7																					1.7085E7		1.4558E7	1.6555E7	1.4977E7			27	F27:6163	6401_02.raw	5	0	0	1	0
2	1	P08123|CO1A2_HUMAN	R.GLHGEFGLP(+15.99)GP.A	Y	29.62	1095.5348	11	0.1	548.7747	2	39.92				3.8244E7	3.961E7	7.3708E7	7.3036E7	7.0147E7			6.2619E6										1.0732E7	1.3482E7				2.2723E7	2.2462E7	2.2713E7	1.8463E7	1.7893E7	22	F22:13431	5289_03_r.raw	13	0	0	0	1
2	1	P08123|CO1A2_HUMAN	P.S(+79.97)GP(+15.99)VGPAGAVGPR.G	Y	29.61	1216.5601	13	9.3	609.2930	2	26.39																										7.6604E6					26	F26:8229	6401_01.raw	1	0	0	0	0
2	1	P08123|CO1A2_HUMAN	R.GAP(+15.99)GPDGNNGAQGPP(+15.99)GPQGVQGGK(+15.99).G	Y	29.36	2160.9783	24	0.8	721.3339	3	16.90																										5.284E6					26	F26:4610	6401_01.raw	1	0	0	0	0
2	1	P08123|CO1A2_HUMAN	K.GENGVVGPTGPVGAAGPAGP.N	Y	29.31	1659.8215	20	0.0	830.9180	2	37.36						2.9789E6																									6	F6:12354	3849_01.raw	1	0	0	0	0
2	1	P08123|CO1A2_HUMAN	R.GSDGSVGPVGPAGPIGSAGPPGFPGAPGPK(+340.10)GEIGAVGN(+.98)AGPAGPAGPR.G	Y	29.29	4410.1250	48	-1.7	1103.5366	4	47.25		9.3466E6		0						0																					2	F2:15814	3399_02.raw	1	0	1	0	0
2	1	P08123|CO1A2_HUMAN	R.GAPGP(+15.99)DGNNGAQGPP(+15.99)GPQGVQGGKG.E	Y	29.06	2202.0049	25	1.9	735.0103	3	18.29								1.4437E7																							8	F8:5166	3849_03.raw	1	0	0	0	0
2	1	P08123|CO1A2_HUMAN	K.GEQGPP(+15.99)GP(+15.99)P(+15.99)GFQGLP(+15.99)GPSGPAGEVGK.P	Y	29.01	2434.1399	26	-0.2	812.3871	3	39.01								2.545E6																							8	F8:12761	3849_03.raw	1	0	0	0	0
2	1	P08123|CO1A2_HUMAN	P.RGLP(+15.99)GSP(+15.99)GNIGPAGK.E	Y	28.97	1408.7422	15	2.0	470.5889	3	17.88	6.2585E6	5.056E6	5.1468E6																			5.3827E6									2	F2:5153	3399_02.raw	4	1	1	1	0
2	1	P08123|CO1A2_HUMAN	E.VGAVGPP(+15.99)GFAGEKGPSGEAGTAGPP(+15.99)GTP(+15.99)GPQGLLGAP(+15.99)GILGLP(+15.99)GSR.G	Y	28.95	4139.0923	46	2.8	1035.7832	4	54.50		0																													2	F2:18287	3399_02.raw	0	0	0	0	0
2	1	P08123|CO1A2_HUMAN	V.GEP(+15.99)GPLGIAGP(+15.99)PGAR.G	Y	28.95	1376.7047	15	1.6	689.3607	2	47.37							0																								7	F7:15699	3849_02.raw	0	0	0	0	0
2	1	P08123|CO1A2_HUMAN	P.VGLP(+15.99)GIDGRP(+15.99)GPIGPAGAR.G	Y	28.83	1787.9641	19	0.1	596.9954	3	37.09							2.9539E6																								7	F7:12166	3849_02.raw	1	0	0	0	0
2	1	P08123|CO1A2_HUMAN	R.TGEVGAVGPP(+15.99)GFAGEK(+15.99).G	Y	28.80	1503.7205	16	5.6	752.8717	2	30.65																0															16	F16:10058	4406_02.raw	0	0	0	0	0
2	1	P08123|CO1A2_HUMAN	R.GP(+15.99)PGAVGSPGVNGAP(+15.99)GEAGR.D	Y	28.60	1734.8284	20	5.8	579.2867	3	18.74										4.0102E6																					10	F10:5500	4312_02.raw	1	0	0	0	0
2	1	P08123|CO1A2_HUMAN	G.EKGPSGEAGTAGP(+15.99)P(+15.99)GTPGPQGLLGAP(+15.99)GILGLP(+15.99)GSR.G	Y	28.39	3213.6265	35	2.8	1072.2191	3	54.11																					0										21	F21:17844	5289_01.raw	0	0	0	0	0
2	1	P08123|CO1A2_HUMAN	G.SVGPVGPAGPIGS(+365.13)AGPPGFPGAPGPK(+178.05)GEIGAVGNAGPAGPAGPR.G	Y	28.37	4296.1187	44	-2.8	1075.0339	4	45.48																											5.047E6				27	F27:15106	6401_02.raw	1	0	0	0	0
2	1	P08123|CO1A2_HUMAN	P.VGLP(+15.99)GIDGRPGPIGPAGAR.G	Y	28.24	1771.9692	19	1.9	591.6648	3	38.89								2.9749E6																							8	F8:12772	3849_03.raw	1	0	0	0	0
2	1	P08123|CO1A2_HUMAN	T.GFP(+15.99)GAAGR.T	N	28.00	747.3663	8	-1.0	374.6901	2	16.34						1.3867E7	1.4788E7	1.4396E7																							7	F7:4401	3849_02.raw	3	0	0	0	0
2	1	P08123|CO1A2_HUMAN	G.ISGPP(+15.99)GP(+15.99)PGP(+15.99)AGK.E	Y	27.88	1178.5930	13	-1.4	590.3030	2	15.68																										5.4527E6					26	F26:4057	6401_01.raw	1	0	0	0	0
2	1	P08123|CO1A2_HUMAN	R.GSDGSVGPVGPAGPIGSAGP(+15.99)P(+15.99)GFPGAPGPK(+178.05)GEIGAVGNAGPAGPAGPR.G	Y	27.85	4279.0781	48	1.6	1427.3689	3	45.48																											5.4578E6				27	F27:15108	6401_02.raw	1	0	0	0	0
2	1	P08123|CO1A2_HUMAN	R.GS(+79.97)DGSVGPVGPAGPIGS(+365.13)AGPPGFPGAPGPKGEIGAVGNAGPAGPAGPR.G	Y	27.76	4514.1392	48	4.8	1129.5475	4	43.20																					3.4737E6										21	F21:14229	5289_01.raw	1	0	0	0	0
2	1	P08123|CO1A2_HUMAN	R.AGVM(+15.99)GP(+15.99)PGSR.G	Y	27.73	959.4494	10	0.0	480.7320	2	13.59									1.4858E6												1.2334E6										9	F9:3458	4312_01.raw	2	0	0	0	0
2	1	P08123|CO1A2_HUMAN	P.SGPQGIRGDK(+15.99)GEP(+15.99)GEK.G	Y	27.50	1642.7910	16	-0.8	411.7047	4	13.47						1.0198E6																									6	F6:3279	3849_01.raw	1	0	0	0	0
2	1	P08123|CO1A2_HUMAN	K.GENGVVGPTGPVGAAGPAGPNGPPGP(+15.99)AGSRGDGGP(+15.99)P(+15.99)GMTGFP(+15.99)GAAGR.T	Y	27.44	4096.9043	47	1.4	1025.2347	4	34.73																						2.1596E7									22	F22:11685	5289_03_r.raw	1	0	0	0	0
2	1	P08123|CO1A2_HUMAN	S.GEAGTAGP(+15.99)PGTPGPQGLLGAP(+15.99)GILGLP(+15.99)GSR.G	Y	27.38	2699.3877	30	-8.3	675.8486	4	49.29	1.9604E6																														1	F1:16672	3399_01.raw	1	1	0	0	0
2	1	P08123|CO1A2_HUMAN	R.GLP(+15.99)GVAGAVGEPGP(+15.99)LGIAGP(+15.99)PGARG.P	Y	27.37	2171.1333	25	3.2	1086.5774	2	45.90																								9.114E6							24	F24:14976	6313_02.raw	1	0	0	0	0
2	1	P08123|CO1A2_HUMAN	K.GHAGLAGAR.G	Y	27.30	808.4304	9	-0.4	405.2223	2	12.42					1.8243E5					3.1804E5																					5	F5:3038	3484_03_r.raw	2	0	0	0	0
2	1	P08123|CO1A2_HUMAN	K.GEP(+15.99)GVVGAVGTAGPSGPSGLPGERG.A	Y	27.27	2177.0713	25	1.6	726.6989	3	36.27	1.7981E7		1.6246E7																												3	F3:12133	3399_03.raw	2	1	0	1	0
2	1	P08123|CO1A2_HUMAN	R.GSDGSVGPVGPAGPIGSAGPPGFPGAPGPK(+340.10)GEIGAVGNAGPAGPAGPR.G	Y	27.19	4409.1411	48	-4.6	1103.2875	4	46.57		2.3625E7					1.5656E7		5.1377E7		3.9838E7											1.5748E7		8.4388E6	7.9213E6						25	F25:15094	6313_03.raw	7	0	1	0	0
2	1	P08123|CO1A2_HUMAN	R.GPQGHQGPAGPP(+15.99)GP(+15.99)PGPP(+15.99)GPP(+15.99)GVSGGGYDFGYDGDFY.R	Y	27.18	3572.5181	37	3.3	1191.8506	3	50.29											2.3615E7																				11	F11:17206	4312_03.raw	1	0	0	0	0
2	1	P08123|CO1A2_HUMAN	S.GPP(+15.99)GPP(+15.99)GPAGK.E	N	27.15	962.4821	11	-1.4	482.2476	2	18.25			1.61E7																												3	F3:5833	3399_03.raw	1	0	0	1	0
2	1	P08123|CO1A2_HUMAN	R.GPQGHQGPAGPP(+15.99)GPP(+15.99)GP(+15.99)P(+15.99)GPPGVSGGGYDFGYDGDFY.R	Y	27.14	3572.5181	37	0.5	1191.8472	3	50.04																					3.5959E7										21	F21:16665	5289_01.raw	1	0	0	0	0
2	1	P08123|CO1A2_HUMAN	R.GAP(+15.99)GAVGAP(+15.99)GP(+15.99)AGATGDRGEAGAAGPAGPAGPR.G	Y	27.03	2742.3069	33	0.7	915.1102	3	20.62										1.5899E7																					10	F10:6197	4312_02.raw	1	0	0	0	0
2	1	P08123|CO1A2_HUMAN	A.GAP(+15.99)GPQGFQGPAGEP(+15.99)GEP(+15.99)GQTGPAGAR.G	Y	26.94	2492.1316	27	2.9	831.7202	3	27.51						1.7193E6																									6	F6:8704	3849_01.raw	1	0	0	0	0
2	1	P08123|CO1A2_HUMAN	G.ARGSDGSVGP(+15.99)VGP(+15.99)AGP(+15.99)IGSAGPP(+15.99)GFP(+15.99)GAP(+15.99)GP(+15.99)KGEIGAVGNAGPAGPAGPR.G	Y	26.89	4408.1431	50	1.6	1103.0448	4	46.38				0																											4	F4:15601	3484_02.raw	0	0	0	0	0
2	1	P08123|CO1A2_HUMAN	L.VGEP(+15.99)GPAGSK.G	Y	26.76	913.4504	10	-0.2	457.7324	2	19.10						0	3.5932E6																								7	F7:5476	3849_02.raw	1	0	0	0	0
2	1	P08123|CO1A2_HUMAN	E.VGAVGPP(+15.99)GFAGEKGPSGEAGTAGP(+15.99)PGTP(+15.99)GPQGLLGAP(+15.99)GILGLP(+15.99)GSR.G	Y	26.75	4139.0923	46	3.5	1035.7839	4	54.22	3.1614E6																				0										21	F21:17881	5289_01.raw	1	1	0	0	0
2	1	P08123|CO1A2_HUMAN	R.GP(+15.99)SGP(+15.99)QGIRGDKGEP(+15.99)GEKGP(+15.99)R.G	Y	26.17	2139.0303	21	8.8	535.7695	4	13.44	3.8013E5																														1	F1:3385	3399_01.raw	1	1	0	0	0
2	1	P08123|CO1A2_HUMAN	R.GPQGHQGPAGPP(+15.99)GPP(+15.99)GPP(+15.99)GPP(+15.99)GVSGGG.Y	Y	26.14	2330.0674	27	3.9	777.6995	3	22.56																						2.3461E7									22	F22:6952	5289_03_r.raw	1	0	0	0	0
2	1	P08123|CO1A2_HUMAN	S.GISGPPGP(+15.99)PGP(+15.99)AGK.E	Y	26.01	1219.6196	14	1.5	610.8180	2	18.69							3.7197E6																								7	F7:5158	3849_02.raw	1	0	0	0	0
2	1	P08123|CO1A2_HUMAN	E.KGP(+15.99)SGEAGTAGP(+15.99)P(+15.99)GTP(+15.99)GPQGLLGAP(+15.99)GILGLP(+15.99)GSR.G	Y	25.99	3116.5737	34	-9.1	1039.8557	3	54.15											0																				11	F11:18363	4312_03.raw	0	0	0	0	0
2	1	P08123|CO1A2_HUMAN	G.S(+203.08)VGPVGPAGPIGSAGPPGFPGAPGPK(+340.10)GEIGAVGNAGPAGPAGPR.G	Y	25.71	4296.1187	44	-10.0	1075.0262	4	44.02		6.3716E6																0													18	F18:14555	4484_01.raw	1	0	1	0	0
2	1	P08123|CO1A2_HUMAN	G.PGP(+15.99)MGLM(+15.99)GPR.G	Y	25.65	1043.4891	10	3.0	522.7534	2	19.64	2.8886E6																				1.8649E6										1	F1:5789	3399_01.raw	2	1	0	0	0
2	1	P08123|CO1A2_HUMAN	E.VGAVGPPGFAGEKGP(+15.99)SGEAGTAGP(+15.99)PGTP(+15.99)GPQGLLGAP(+15.99)GILGLP(+15.99)GSR.G	Y	25.58	4139.0923	46	3.2	1035.7837	4	54.31			2.6408E6																												3	F3:18377	3399_03.raw	1	0	0	1	0
2	1	P08123|CO1A2_HUMAN	G.S(+79.97)DGSVGPVGPAGPIGS(+365.13)AGPPGFPGAPGPKGEIGAVGNAGPAGPAGPR.G	Y	25.53	4457.1177	47	3.2	1115.2903	4	43.46																											3.834E7				27	F27:14372	6401_02.raw	1	0	0	0	0
2	1	P08123|CO1A2_HUMAN	P.SGEAGTAGP(+15.99)P(+15.99)GTPGPQGLLGAP(+15.99)GILGLP(+15.99)GSR.G	Y	25.45	2802.4146	31	3.4	935.1487	3	54.68																				2.2762E5											20	F20:18215	4484_03.raw	1	0	0	0	0
2	1	P08123|CO1A2_HUMAN	G.EPGVVGAVGT(+203.08)AGPSGPSGLP(+15.99)GER.G	Y	25.39	2266.1077	23	-8.3	756.3702	3	37.99	0																														1	F1:12739	3399_01.raw	0	0	0	0	0
2	1	P08123|CO1A2_HUMAN	K.GENGVVGPTGPVGAAGP.A	Y	25.36	1434.7102	17	4.7	718.3657	2	34.40																													0	0	30	F30:11034	6474_02.raw	0	0	0	0	0
2	1	P08123|CO1A2_HUMAN	K.GPSGEAGT(+203.08)AGPPGT(+203.08)PGPQGLLGAPGILGLP(+15.99)GSR.G	Y	25.31	3314.6631	33	4.7	1105.9001	3	54.28											0																				11	F11:18407	4312_03.raw	0	0	0	0	0
2	1	P08123|CO1A2_HUMAN	R.GYP(+15.99)GNIGPV.G	Y	25.29	888.4341	9	0.1	445.2244	2	34.34						4.3726E7																									6	F6:11312	3849_01.raw	1	0	0	0	0
2	1	P08123|CO1A2_HUMAN	R.GSDGSVGPVGPAGPIGSAGPP(+15.99)GFPGAPGPK(+340.10)GEIGAVGNAGPAGPAGPR.G	Y	25.10	4425.1357	48	0.9	1107.2922	4	46.47											0																				11	F11:15784	4312_03.raw	0	0	0	0	0
2	1	P08123|CO1A2_HUMAN	R.GEVGLP(+15.99)GLSGP(+15.99)VGP(+15.99)P(+15.99)GNP(+15.99)GANGLTGAKGAAGLP(+15.99)GVAGAP(+15.99)GLPGP(+15.99)RG.I	Y	25.10	4050.0403	46	-0.3	1013.5170	4	54.96			4.0676E6																												3	F3:18729	3399_03.raw	1	0	0	1	0
2	1	P08123|CO1A2_HUMAN	R.GS(+79.97)DGSVGPVGPAGPIGSAGPP(+15.99)GFPGAPGPK(+114.04)GEIGAVGNAGPAGPAGPR.G	Y	25.06	4279.0444	48	8.4	1070.7773	4	43.73																						0									22	F22:14723	5289_03_r.raw	0	0	0	0	0
2	1	P08123|CO1A2_HUMAN	P.NGEAGSAGPPGP(+15.99)P(+15.99)GLR.G	Y	25.05	1464.6957	16	-8.0	733.3492	2	23.19												3.4585E8																			12	F12:6637	4371_01.raw	1	0	0	0	0
2	1	P08123|CO1A2_HUMAN	I.SGPPGP(+15.99)PGPAGK.E	Y	24.94	1033.5192	12	-8.5	517.7625	2	18.31																											4.7492E6				27	F27:5251	6401_02.raw	1	0	0	0	0
2	1	P08123|CO1A2_HUMAN	L.RGS(+79.97)PGSRGLPGADGR.A	Y	24.79	1518.7052	15	-1.4	380.6830	4	14.36							1.4464E6																								7	F7:3480	3849_02.raw	1	0	0	0	0
2	1	P08123|CO1A2_HUMAN	R.GAP(+15.99)GAVGAP(+15.99)GPAGATGDRGEAGAAGPAGP.A	Y	24.76	2345.0994	29	0.7	782.7076	3	23.70																												3.2018E6			28	F28:7274	6401_03.raw	1	0	0	0	0
2	1	P08123|CO1A2_HUMAN	R.TGEVGAVGPPGFAGEKGP(+15.99)SGEAGTAGP(+15.99)PGTP(+15.99)GPQGLLGAP(+15.99)GILGLP(+15.99)GSRG.E	Y	24.72	4483.2251	50	0.3	1495.4160	3	54.87	1.0319E7																														1	F1:18328	3399_01.raw	1	1	0	0	0
2	1	P08123|CO1A2_HUMAN	R.GLP(+15.99)GVAGAVGEPGP(+15.99)LGIAGP(+15.99)PGAR.G	Y	24.70	2114.1118	24	0.0	1058.0632	2	69.67																					0										21	F21:23022	5289_01.raw	0	0	0	0	0
2	1	P08123|CO1A2_HUMAN	R.GPQGHQGPAGPP(+15.99)GPP(+15.99)GPP(+15.99)GPP(+15.99)GV.S	Y	24.57	2071.9709	23	0.7	691.6647	3	25.10																						3.0418E6									22	F22:7916	5289_03_r.raw	1	0	0	0	0
1	2	P02452|CO1A1_HUMAN	R.GEQGPAGSP(+15.99)GFQGLP(+15.99)GPAGPP(+15.99)GEAGKP(+15.99)GEQGVPGDLGAP(+15.99)GPSGAR.G	Y	124.81	4095.9155	45	-1.4	1366.3105	3	37.78	4.731E8	4.616E8	4.6098E8	2.6365E8	2.3622E8	1.4499E8	1.3251E8	1.4415E8	2.4925E8	2.5585E8	2.673E8	1.2819E7	1.2137E7				1.8745E6	2.4362E7	1.7265E7	2.5252E7	3.0012E8	3.9068E8	1.5724E7	1.2972E7		1.2493E8	1.3503E8	1.2742E8			11	F11:12787	4312_03.raw	43	2	2	2	3
1	2	P02452|CO1A1_HUMAN	R.GEQGPAGSP(+15.99)GFQGLP(+15.99)GPAGPP(+15.99)GEAGKP(+15.99)GEQGVP(+15.99)GDLGAP(+15.99)GPSGAR.G	Y	117.80	4111.9106	45	1.3	1371.6460	3	35.67	1.047E9	9.6804E8	1.0118E9	5.4829E8	6.009E8	7.1512E8	6.8586E8	6.635E8	5.8796E8	6.0465E8	6.4757E8	1.2283E8	1.2977E8	1.2229E8	6.3774E7	5.0736E7	5.0639E7	1.1012E8	1.2E8	1.1967E8	8.3701E8	1.1308E9	9.7141E7	9.7591E7	9.6448E7	5.2437E8	5.1958E8	5.0581E8	7.6296E6	3.5712E7	11	F11:12003	4312_03.raw	64	2	3	3	2
1	2	P02452|CO1A1_HUMAN	K.GDAGPP(+15.99)GPAGPAGPP(+15.99)GPIGNVGAP(+15.99)GAK.G	Y	111.43	2280.1133	27	1.9	1141.0660	2	30.03	3.085E8	1.6456E9	1.814E9	2.0002E8	1.2239E9	1.0551E9	9.6395E8	2.0347E8	1.5875E8	1.0575E9	1.0344E9	3.6492E7	3.3888E7	1.6194E8	1.342E8	2.5066E7	2.6914E7	3.6402E7	4.1823E7	4.2829E7	1.1843E9	1.6367E9	1.9404E8	1.8952E8	1.9239E8	1.5387E8	1.0845E9	1.0021E9		3.4267E6	2	F2:9864	3399_02.raw	49	2	3	3	1
1	2	P02452|CO1A1_HUMAN	R.GETGPAGPP(+15.99)GAP(+15.99)GAP(+15.99)GAP(+15.99)GPVGPAGK.S	Y	106.22	2184.0444	26	-2.2	1093.0271	2	23.11	3.8619E8	3.8553E8	4.4388E8	3.0193E8	3.1767E8	3.9266E8	3.4974E8	3.3218E8	3.988E8	4.1521E8	4.106E8	9.8506E7	9.6711E7	7.7332E7	8.1897E7	7.76E7	7.5734E7	8.4826E7	8.8684E7	8.487E7	1.9862E8	2.754E8	6.6583E7	5.9573E7	6.1019E7	2.4673E8	2.5436E8	2.3684E8	2.1103E7	2.0983E7	7	F7:7167	3849_02.raw	60	2	2	2	2
1	2	P02452|CO1A1_HUMAN	R.GETGPAGPP(+15.99)GAPGAP(+15.99)GAPGPVGPAGK.S	Y	103.59	2152.0547	26	1.0	1077.0356	2	27.30	6.9436E7	6.1812E7	6.9512E7	5.8282E7	5.7519E7	5.4885E7	5.2077E7	5.1118E7	9.2105E7	9.436E7	9.5802E7	7.8065E6	9.0652E6	6.1104E6				8.5133E6	8.5813E6	6.7544E6	3.3451E7	4.3087E7	5.3718E6	4.9872E6	5.1107E6	5.1809E7	5.186E7	5.1334E7			7	F7:8678	3849_02.raw	45	2	2	2	2
1	2	P02452|CO1A1_HUMAN	R.GFSGLQGPP(+15.99)GPP(+15.99)GSP(+15.99)GEQGPSGASGPAGPR.G	Y	102.58	2704.2476	30	0.8	1353.1321	2	34.06	7.8629E8	7.0515E8	7.5061E8	4.8493E8	4.3514E8	4.704E8	4.0468E8	4.1109E8	4.6668E8	4.604E8	4.8517E8	5.4794E7	5.3651E7	4.8009E7	3.5283E7	2.8229E7	3.1508E7	5.9952E7	6.8122E7	6.5482E7	4.9729E8	7.1731E8	5.1994E7	4.93E7	5.1382E7	3.3976E8	3.6437E8	3.8938E8	1.0951E7	1.2064E7	7	F7:11088	3849_02.raw	59	3	2	2	2
1	2	P02452|CO1A1_HUMAN	K.GDAGPP(+15.99)GPAGPAGPPGPIGNVGAP(+15.99)GAK.G	Y	101.18	2264.1184	27	1.9	1133.0686	2	32.58	6.4219E7	5.7509E7	6.2073E7	3.8466E7	3.7837E7	4.5197E7	3.8775E7	3.9114E7	4.2854E7	4.4737E7	4.8686E7								6.3158E6	5.56E6	3.8737E7	5.4339E7		4.3394E6	5.0603E6	4.021E7	4.2365E7	4.5188E7			2	F2:10675	3399_02.raw	37	2	2	2	2
1	2	P02452|CO1A1_HUMAN	K.GDRGETGPAGPP(+15.99)GAP(+15.99)GAP(+15.99)GAP(+15.99)GPVGPAGK.S	Y	98.01	2512.1941	29	1.5	1257.1062	2	19.84	6.6132E8	6.0881E8	6.4756E8	2.9059E8	2.9345E8	4.5977E8	4.5155E8	4.375E8	2.8962E8	2.883E8	3.1117E8	8.5052E7	8.5279E7	7.6788E7	6.2129E7	5.7457E7	5.4931E7	9.8068E7	1.0211E8	9.9914E7	4.1989E8	5.0542E8	1.0525E8	9.3646E7	9.4759E7	3.1105E8	3.0467E8	2.8686E8	2.6202E7	2.2817E7	2	F2:5859	3399_02.raw	46	2	2	2	2
1	2	P02452|CO1A1_HUMAN	R.GLTGPIGPP(+15.99)GPAGAP(+15.99)GDKGESGPSGPAGPTGAR.G	Y	97.41	2868.4001	33	2.3	957.1428	3	31.76	3.0152E8	2.6586E8	3.024E8	5.9599E7	6.1941E7	1.1235E8	9.2571E7	1.0391E8	3.3423E7	3.7358E7	3.4704E7	9.0671E6	9.2245E6	9.0843E6			4.6292E6	1.2442E7	1.3578E7	1.5391E7	1.8823E8	2.4917E8	5.9784E7	6.1666E7	6.3716E7	1.4368E8	1.4978E8	1.4648E8	1.6017E6		7	F7:10300	3849_02.raw	51	3	2	3	2
1	2	P02452|CO1A1_HUMAN	R.GFSGLQGP(+15.99)P(+15.99)GPP(+15.99)GSP(+15.99)GEQGPSGASGPAGPR.G	Y	97.32	2720.2424	30	3.2	1361.1328	2	30.92	6.5216E6	7.2792E6		9.4862E6	9.0283E6	9.0716E6	8.75E6	9.3707E6	1.0655E7	1.0882E7	1.0287E7										6.8166E6	8.6798E6				4.5114E6					9	F9:10062	4312_01.raw	13	1	1	0	1
1	2	P02452|CO1A1_HUMAN	R.GEP(+15.99)GPP(+15.99)GPAGAAGPAGNP(+15.99)GADGQP(+15.99)GAK.G	Y	96.92	2315.0413	27	1.0	1158.5291	2	17.58	3.8169E8	3.5756E8	3.7374E8	2.207E8	2.2559E8	2.7951E8	2.735E8	2.5439E8	2.4573E8	2.4146E8	2.6257E8	5.1164E7	4.9764E7	4.6866E7	4.0022E7	3.6415E7	3.816E7	6.4851E7	6.3556E7	6.3874E7	2.0674E8	2.8886E8	4.8804E7	4.6126E7	4.3662E7	2.1344E8	2.2331E8	2.181E8	1.2115E7	1.2095E7	2	F2:4952	3399_02.raw	58	2	2	2	2
1	2	P02452|CO1A1_HUMAN	R.GFSGLQGPP(+15.99)GPPGSP(+15.99)GEQGPSGASGPAGPR.G	Y	96.30	2688.2527	30	1.9	1345.1362	2	34.08	1.4419E8	1.2483E8	1.2906E8	1.0823E8	1.0261E8	7.6667E7	6.508E7	6.3691E7	9.0834E7	1.0376E8	1.0097E8		5.2914E6	4.2308E6					8.5673E6	7.4523E6	9.3484E7	1.3841E8	5.125E6			6.478E7	5.9824E7	6.1248E7			2	F2:11308	3399_02.raw	30	2	2	2	2
1	2	P02452|CO1A1_HUMAN	R.GNDGATGAAGPP(+15.99)GPTGPAGPP(+15.99)GFP(+15.99)GAVGAK.G	Y	96.17	2547.1987	30	0.4	1274.6072	2	32.65	7.4827E8	7.578E8	8.4063E8	4.7624E8	4.2051E8	4.7349E8	3.4625E8	4.1138E8	3.6223E8	4.2116E8	3.9742E8	7.7712E7	7.0206E7	7.2317E7	4.1182E7	4.0424E7	4.5982E7	7.8083E7	8.6445E7	8.5632E7	4.7663E8	6.2085E8	9.8026E7	9.6908E7	1.121E8	3.6119E8	3.7573E8	3.7749E8	1.1276E7		2	F2:10745	3399_02.raw	84	4	4	4	4
1	2	P02452|CO1A1_HUMAN	R.GFSGLQGPP(+15.99)GPP(+15.99)GSPGEQGPSGASGPAGPR.G	Y	96.17	2688.2527	30	0.2	897.0917	3	34.11	1.4419E8	1.2483E8	1.2906E8	1.0823E8	1.1353E8	6.8574E7	6.508E7	6.3691E7	1.0332E8	9.1573E7	1.1254E8										9.3484E7	1.3841E8				6.478E7	6.6518E7	6.1248E7			11	F11:11274	4312_03.raw	27	2	2	2	2
1	2	P02452|CO1A1_HUMAN	K.GDRGETGPAGPP(+15.99)GAP(+15.99)GAPGAP(+15.99)GPVGPAGK.S	Y	93.77	2496.1992	29	0.1	833.0738	3	21.85	2.9258E8	2.938E8	3.2663E8	1.5248E8	1.5081E8	2.1062E8	1.9434E8	1.8949E8	1.61E8	1.563E8	1.6744E8	2.2663E7	2.4394E7	1.9607E7	0	0	0	0	0	0	2.1111E8	2.8964E8	3.7206E7	2.9917E7	3.1526E7	1.723E8	1.6773E8	1.4929E8			2	F2:6503	3399_02.raw	23	1	2	1	1
1	2	P02452|CO1A1_HUMAN	R.GEQGPAGSP(+15.99)GFQGLP(+15.99)GPAGP(+15.99)PGEAGKP(+15.99)GEQGVPGDLGAP(+15.99)GPSGAR.G	Y	92.98	4095.9155	45	1.2	1366.3141	3	37.79			1.0822E8		1.7857E8			1.0428E8				5.1593E6										7.5148E6			1.4912E7	3.0962E7					3	F3:12602	3399_03.raw	8	0	0	2	0
1	2	P02452|CO1A1_HUMAN	R.GEQGPAGSP(+15.99)GFQGLP(+15.99)GPAGPP(+15.99)GEAGK.P	Y	92.82	2364.0981	26	0.1	1183.0565	2	32.61	1.3583E8	1.2013E8	1.2955E8	1.7539E8	1.615E8	1.2994E8	1.169E8	1.2445E8	2.029E8	2.042E8	2.2032E8	2.291E7	2.2385E7	2.0919E7	2.1491E7	2.3334E7	2.1844E7	2.2693E7	3.3757E7	3.2365E7	4.8014E7	6.5571E7	1.2031E7	1.1644E7	1.2174E7	1.099E8	1.1314E8	1.1563E8	5.871E6	8.48E6	11	F11:10812	4312_03.raw	54	2	2	2	2
1	2	P02452|CO1A1_HUMAN	K.GDAGPP(+15.99)GPAGP(+15.99)AGPP(+15.99)GPIGNVGAP(+15.99)GAK.G	Y	92.15	2296.1082	27	2.2	1149.0638	2	29.58	1.8772E8	2.6836E8	2.6047E8	6.0481E7	8.6953E7	4.5385E7	1.1923E8	1.2303E8	9.1649E7	1.4336E8	3.297E7							2.6214E6			1.7153E8	2.3661E8			6.2166E6	2.9219E7	1.0301E8	8.6968E7			7	F7:9502	3849_02.raw	28	2	2	2	1
1	2	P02452|CO1A1_HUMAN	R.GEP(+15.99)GPP(+15.99)GPAGAAGPAGNP(+15.99)GADGQPGAK.G	Y	92.00	2299.0464	27	2.9	1150.5338	2	20.15	7.4379E7	7.1387E7	7.2167E7	3.7423E7	4.1376E7	5.7253E7	5.1624E7	4.9975E7	6.264E7	6.0808E7	6.5123E7							8.4034E6	1.1122E7	7.9818E6	4.1812E7	5.0841E7			6.5213E6	4.7059E7	5.1264E7	4.9181E7			7	F7:5914	3849_02.raw	37	2	2	2	2
1	2	P02452|CO1A1_HUMAN	K.DGEAGAQGPP(+15.99)GPAGPAGERGEQGPAGSP(+15.99)GFQGLP(+15.99)GPAGPP(+15.99)GEAGKP(+15.99)GEQGVP(+15.99)GDLGAP(+15.99)GPSGAR.G	Y	91.35	5799.6655	64	1.2	1450.9254	4	35.98	1.1279E8	1.0396E8	1.09E8	0	3.0892E7	5.6495E7	5.9752E7	6.0309E7	2.0429E7	1.7266E7											1.3554E8	4.6845E7	0			2.921E7	3.0461E7	3.3155E7			2	F2:11938	3399_02.raw	21	2	2	2	0
1	2	P02452|CO1A1_HUMAN	R.GNDGATGAAGPP(+15.99)GPTGPAGPP(+15.99)GFPGAVGAK.G	Y	91.22	2531.2039	30	-0.5	1266.6085	2	35.76	8.9246E7	8.4167E7	8.5187E7	3.7663E7	4.5678E7	5.6646E7	5.5681E7	5.5011E7	6.0168E7	5.8969E7	5.8523E7		4.5574E6	3.393E6				4.6074E6	3.5176E5	3.572E6	5.9496E7	7.9977E7	6.5841E6	5.4548E6	5.2942E6	6.2667E7	6.3314E7	5.9611E7			2	F2:11865	3399_02.raw	40	2	2	2	2
1	2	P02452|CO1A1_HUMAN	K.GDRGETGPAGPP(+15.99)GAPGAP(+15.99)GAPGPVGPAGK.S	Y	91.08	2480.2043	29	-1.9	827.7405	3	25.09	9.3449E7	9.577E7	9.9569E7	4.9895E7	5.2046E7	6.7841E7	6.3272E7	6.3897E7	6.1819E7	6.2625E7	6.3423E7	6.8949E6	6.5368E6	5.5687E6				1.1011E7	1.1216E7	1.0845E7	7.0136E7	9.7246E7	1.0463E7	8.6069E6	8.9195E6	6.5514E7	6.2907E7	5.8352E7			7	F7:7919	3849_02.raw	25	1	1	1	1
1	2	P02452|CO1A1_HUMAN	R.GAP(+15.99)GDRGEP(+15.99)GPP(+15.99)GPAGFAGPP(+15.99)GADGQPGAK.G	Y	90.53	2702.2319	30	0.0	901.7513	3	25.57	2.3569E8	2.3475E8	2.5126E8	1.2294E8	9.8456E7	1.4349E8	1.2039E8	1.293E8	9.9898E7	9.6677E7	1.074E8	1.5098E7	1.4197E7	1.6236E7	5.8078E6	7.6819E6	7.6566E6	3.4276E7	3.2078E7	3.2379E7	1.8942E8	2.53E8	2.6483E7	2.7041E7	2.5851E7	1.4499E8	1.3638E8	1.223E8	5.8787E6	5.3673E6	11	F11:8189	4312_03.raw	42	2	2	2	2
1	2	P02452|CO1A1_HUMAN	K.GDAGP(+15.99)P(+15.99)GPAGPAGPP(+15.99)GPIGNVGAP(+15.99)GAK.G	Y	90.17	2296.1082	27	1.5	1149.0631	2	29.76	2.9089E8	3.6275E8	3.6377E8	2.2542E8	2.0242E8	7.3774E7	1.3751E8	1.8012E8	2.8491E8	1.4336E8	9.7892E7	2.8605E7	2.0257E7	2.4875E7			1.2332E7	1.0236E7	1.8777E7	1.6364E7	2.2722E8	2.3296E8	4.0309E7	2.2556E7	6.2166E6	6.7226E7	1.0301E8	1.9409E8			2	F2:9408	3399_02.raw	49	2	2	2	3
1	2	P02452|CO1A1_HUMAN	R.GEQGPAGSP(+15.99)GFQGLP(+15.99)GPAGP(+15.99)PGEAGKP(+15.99)GEQGVP(+15.99)GDLGAP(+15.99)GPSGAR.G	Y	89.50	4111.9106	45	0.4	1028.9854	4	37.04	2.0432E7		1.8065E7	4.0191E8	4.4378E8	1.9694E8	1.3748E7			4.2508E8	4.7471E8	8.0381E7							4.2571E7		2.4414E8				7.6642E7	3.494E6	1.4375E8	3.7017E8	2.7833E7		12	F12:12050	4371_01.raw	20	1	0	1	2
1	2	P02452|CO1A1_HUMAN	R.GSEGPQGVRGEP(+15.99)GPP(+15.99)GPAGAAGPAGNP(+15.99)GADGQP(+15.99)GAK.G	Y	89.49	3182.4612	36	1.0	1061.8287	3	19.89	1.6083E7	2.1417E7	1.7182E7			5.4755E6	7.3974E6														9.3298E6		5.1175E6		5.0886E6	1.1094E7	8.0801E6	7.4762E6			2	F2:5860	3399_02.raw	11	1	1	1	0
1	2	P02452|CO1A1_HUMAN	R.GEQGPAGSP(+15.99)GFQGLP(+15.99)GP(+15.99)AGP(+15.99)PGEAGKP(+15.99)GEQGVP(+15.99)GDLGAP(+15.99)GPSGAR.G	Y	88.78	4127.9053	45	0.4	1376.9762	3	33.33	0	2.3317E7				3.4093E7								1.5114E7																	2	F2:10930	3399_02.raw	3	0	1	0	0
1	2	P02452|CO1A1_HUMAN	R.GFSGLQGP(+15.99)P(+15.99)GP(+15.99)P(+15.99)GSP(+15.99)GEQGPSGASGPAGPR.G	Y	88.46	2736.2373	30	1.3	1369.1277	2	30.79	4.6437E7	3.7088E7	3.9589E7	3.002E7	3.165E7	6.0901E7	5.976E7	6.499E7	7.2982E7	7.5816E7	7.0598E7	1.8213E7	1.6351E7	1.493E7		8.1911E6	8.8589E6	9.0008E6		9.9941E6	4.1137E7	6.7196E7	8.9897E6	9.4557E6	8.5172E6	2.8918E7	2.4514E7	2.8472E7			7	F7:9897	3849_02.raw	41	2	1	1	1
1	2	P02452|CO1A1_HUMAN	K.GSP(+15.99)GADGPAGAP(+15.99)GTP(+15.99)GPQGIAGQR.G	Y	88.19	2119.9880	24	-2.8	1060.9983	2	23.77	4.6623E8	4.1282E8	4.6996E8	3.5544E8	2.6786E8	2.1543E8	2.0202E8	2.7094E8	9.0922E7	2.7215E8	9.0923E7	2.2841E7	2.8161E7	2.2067E7	1.6019E7	1.7068E7	1.5198E7	7.1302E7	6.9394E7	6.7919E7	3.0664E8	3.8451E8	1.717E7	1.6567E7	1.5456E7	2.4587E8	2.436E8	2.3628E8	2.2508E7	2.2457E7	7	F7:7290	3849_02.raw	53	2	2	2	3
1	2	P02452|CO1A1_HUMAN	R.GEQGPAGSP(+15.99)GFQGLP(+15.99)GP(+15.99)AGPP(+15.99)GEAGKP(+15.99)GEQGVP(+15.99)GDLGAP(+15.99)GPSGAR.G	Y	88.01	4127.9053	45	0.1	1376.9758	3	33.39	1.2631E8	8.9869E7	1.2228E8	7.7689E7	7.716E7	1.3546E8	1.2008E8	1.1918E8	5.7E7	8.6436E7	8.1096E7	2.4222E7	2.6354E7	2.3043E7	8.8868E6	7.1975E6		1.5788E7	1.1984E7		1.3418E8	1.8852E8	1.5483E7	1.4363E7	1.8829E7	7.7853E7	8.1126E7	7.6322E7	5.0258E6		11	F11:11076	4312_03.raw	46	2	1	2	2
1	2	P02452|CO1A1_HUMAN	K.GDRGETGPAGPP(+15.99)GAP(+15.99)GAP(+15.99)GAPGPVGPAGK.S	Y	88.00	2496.1992	29	-2.7	833.0715	3	23.22	2.9611E8	2.8937E8	3.3161E8	1.5248E8	1.5081E8	2.1062E8	1.9434E8	1.8949E8	1.61E8	1.563E8		2.2663E7	2.4394E7	1.9607E7				0		0		2.8964E8		2.9917E7	3.1526E7		1.6773E8	1.4929E8			7	F7:7162	3849_02.raw	20	2	1	2	1
1	2	P02452|CO1A1_HUMAN	R.GLTGPIGPP(+15.99)GPAGAPGDKGESGPSGPAGPTGAR.G	Y	87.72	2852.4053	33	0.5	951.8095	3	31.50	2.3705E7	2.3014E7	2.4035E7				4.6227E6														1.3037E7	1.7165E7		2.2516E6	2.0469E6	7.7184E6	7.1023E6	6.2827E6			2	F2:10265	3399_02.raw	11	1	1	1	0
1	2	P02452|CO1A1_HUMAN	R.GFSGLQGPPGP(+15.99)PGSP(+15.99)GEQGPSGASGPAGPR.G	Y	87.37	2688.2527	30	0.2	897.0917	3	34.11								8.8048E6			1.1254E8																				11	F11:11446	4312_03.raw	3	0	0	0	0
1	2	P02452|CO1A1_HUMAN	R.GEP(+15.99)GPP(+15.99)GPAGFAGPP(+15.99)GADGQP(+15.99)GAK.G	Y	86.83	2148.9709	24	-0.1	1075.4927	2	28.15	4.252E8	3.7376E8	3.5882E8	2.5584E8	2.4481E8	2.9793E8	3.2866E8	2.8547E8	3.1355E8	3.3465E8	3.4406E8	8.3917E7	7.8888E7	7.1593E7	5.2778E7	4.8214E7	4.9252E7	6.825E7	6.9884E7	7.246E7	1.845E8	2.3846E8	6.0266E7	5.7288E7	5.7951E7	1.8775E8	1.9375E8	1.8782E8	1.8541E7	1.9869E7	7	F7:9052	3849_02.raw	61	2	2	2	2
1	2	P02452|CO1A1_HUMAN	R.GAP(+15.99)GDRGEP(+15.99)GPP(+15.99)GPAGFAGPP(+15.99)GADGQP(+15.99)GAK.G	Y	86.23	2718.2268	30	1.8	907.0845	3	24.32	2.7117E8	3.1032E8	3.5518E8	1.2675E8	1.3807E8	2.3943E8	2.5053E8	1.8563E8	1.0219E8	1.2648E8	9.7342E7	3.1644E7						4.1541E7	4.9953E7	4.3031E7	2.749E8	2.8078E8	4.5809E7	4.6378E7	4.1513E7	1.969E8	1.6873E8	1.8143E8			2	F2:7743	3399_02.raw	36	2	2	2	2
1	2	P02452|CO1A1_HUMAN	R.GEP(+15.99)GPP(+15.99)GPAGFAGPP(+15.99)GADGQPGAK.G	Y	85.66	2132.9761	24	1.0	1067.4963	2	29.47	2.876E8	2.7295E8	2.8588E8	2.2375E8	2.1425E8	2.0567E8	1.8873E8	1.8294E8	2.8988E8	2.8873E8	3.045E8	3.8867E7	3.8902E7	3.4987E7	2.8166E7	2.197E7	2.3974E7	3.8932E7	4.73E7	4.4824E7	1.5226E8	1.9862E8	2.8486E7	2.76E7	2.8513E7	1.589E8	1.5308E8	1.5601E8	6.9511E6	7.5069E6	7	F7:9493	3849_02.raw	58	2	2	2	2
1	2	P02452|CO1A1_HUMAN	R.GETGPAGPP(+15.99)GAPGAP(+15.99)GAP(+15.99)GPVGPAGK.S	Y	84.82	2168.0496	26	-2.1	1085.0298	2	25.31			4.5737E7	1.1539E8		1.4451E8	3.6407E7	9.2937E7	1.4868E8	1.6787E8	5.9378E7		2.5447E7	1.6352E7		1.3166E7		1.9183E7		1.9711E7							1.3175E8	1.3073E8	3.8176E6	3.7387E6	7	F7:7964	3849_02.raw	21	0	0	1	1
1	2	P02452|CO1A1_HUMAN	K.GSPGADGPAGAP(+15.99)GTPGPQGIAGQR.G	Y	84.00	2087.9983	24	0.2	1045.0066	2	25.46	1.7256E8	1.6365E8	1.6975E8	1.0785E8	1.0196E8	4.9701E7	4.1785E7	4.4535E7	1.1991E8	1.2166E8	1.1979E8	8.8126E6	1.297E7	1.1851E7	4.2989E6	3.5267E6		1.7109E7	1.7349E7	1.7831E7	1.1107E8	1.417E8	1.7962E7	1.6105E7	1.5513E7	1.0762E8	9.9575E7	9.8315E7	2.3534E6	2.4489E6	3	F3:8149	3399_03.raw	54	3	2	2	2
1	2	P02452|CO1A1_HUMAN	R.GETGPAGRP(+15.99)GEVGPP(+15.99)GPPGPAGEK.G	Y	83.98	2199.0554	24	1.7	734.0270	3	19.90	5.9038E7	5.6467E7	5.9397E7	3.1665E7	2.9937E7	2.8357E7	2.9707E7	2.9214E7	4.0717E7	4.0679E7	4.4117E7							3.9093E6	4.0495E6	3.991E6	3.5296E7	4.243E7	2.5297E6		2.1678E6	2.4807E7	2.6257E7	2.423E7			2	F2:5895	3399_02.raw	21	1	1	1	1
1	2	P02452|CO1A1_HUMAN	K.DGEAGAQGPPGP(+15.99)AGPAGERGEQGPAGSP(+15.99)GFQGLP(+15.99)GPAGPP(+15.99)GEAGKP(+15.99)GEQGVP(+15.99)GDLGAP(+15.99)GPSGAR.G	Y	83.85	5799.6655	64	3.0	1160.9438	5	36.04	8.0737E7	7.5331E7	7.8541E7			5.6495E7	3.918E7	3.7709E7														3.3675E6									2	F2:11913	3399_02.raw	8	1	1	1	0
1	2	P02452|CO1A1_HUMAN	R.GETGPAGPP(+15.99)GAP(+15.99)GAP(+15.99)GAPGPVGPAGK.S	Y	83.69	2168.0496	26	0.8	1085.0330	2	23.92		1.8207E8	1.9924E8	3.4404E7	1.6126E8	1.4451E8	1.2386E8	1.2872E8	5.9996E7	2.3103E8	2.2839E8	2.211E7	2.5447E7	5.2028E6				2.5422E7	6.3211E6	6.5431E6	7.2E7	1.2192E8	1.7421E7			3.1706E7	1.3175E8	1.3073E8			11	F11:7513	4312_03.raw	35	0	2	2	1
1	2	P02452|CO1A1_HUMAN	K.GSP(+15.99)GADGPAGAP(+15.99)GTPGPQGIAGQR.G	Y	83.61	2103.9932	24	1.0	1053.0049	2	24.72	4.9258E8	4.8427E8	5.3058E8	3.1129E8	3.0752E8	1.4237E8	1.4785E8	1.2761E8	3.1378E8	3.1847E8	3.1975E8	5.39E7	5.0689E7	4.2957E7	2.9255E7	2.517E7	2.5539E7	5.4224E7	5.9279E7	5.7433E7	5.4833E8	4.1909E8	5.6386E7	5.6968E7	5.3579E7	3.3244E8	2.7387E8	2.6282E8	1.4898E7	1.2659E7	10	F10:7736	4312_02.raw	61	2	2	2	2
1	2	P02452|CO1A1_HUMAN	V.RGEP(+15.99)GPP(+15.99)GPAGAAGPAGNP(+15.99)GADGQP(+15.99)GAK.G	Y	83.56	2471.1423	28	0.0	824.7214	3	16.69						3.2639E7	3.5694E7	3.2287E7																							7	F7:4561	3849_02.raw	3	0	0	0	0
1	2	P02452|CO1A1_HUMAN	R.GETGPAGRP(+15.99)GEVGPP(+15.99)GPP(+15.99)GPAGEK.G	Y	83.15	2215.0503	24	6.8	1108.5399	2	18.44	1.5438E9	1.5023E9	1.5452E9	1.5486E7	1.427E7	1.1182E9	1.051E9	1.039E9	1.5444E7	7.2766E8	7.9124E8		1.6688E8	1.4558E8	9.8542E7	8.8806E7	9.939E7	1.8617E8	1.9241E8	1.8575E8	9.2497E8	3.2147E7	1.618E8		1.3892E8	8.1654E8	8.0637E8	1.5258E7	3.2421E7	2.8077E7	9	F9:5309	4312_01.raw	41	2	2	2	1
1	2	P02452|CO1A1_HUMAN	K.DGEAGAQGPP(+15.99)GPAGPAGERGEQGPAGSP(+15.99)GFQGLP(+15.99)GPAGP(+15.99)PGEAGKP(+15.99)GEQGVP(+15.99)GDLGAP(+15.99)GPSGAR.G	Y	81.78	5799.6655	64	0.6	1450.9246	4	36.04	8.0737E7		3.0457E7								2.1929E7										1.3554E8			0	0	1.2512E7	0				3	F3:12028	3399_03.raw	6	1	0	1	0
1	2	P02452|CO1A1_HUMAN	R.GFSGLQGP(+15.99)PGPP(+15.99)GSP(+15.99)GEQGPSGASGPAGPR.G	Y	81.17	2704.2476	30	3.1	1353.1353	2	32.66		7.7368E6	6.4552E8		4.6332E6			6.7789E6	6.2193E6								2.718E7				9.0644E6		3.8201E6		5.5214E7			3.4695E8		1.2064E7	25	F25:10287	6313_03.raw	12	0	1	1	0
1	2	P02452|CO1A1_HUMAN	K.GSPGADGPAGAP(+15.99)GTP(+15.99)GPQGIAGQR.G	Y	80.63	2103.9932	24	-0.1	1053.0038	2	23.40	7.2079E7	4.0321E8	7.6061E7	4.3365E7	4.728E7	2.5352E7	2.1256E7	2.4955E7	2.4698E8	5.0827E7	5.4097E7	0	0	0				0	0		2.3516E8	6.8074E7	5.6053E6		4.1713E6	8.4688E7	4.7926E7	4.7647E7			11	F11:7336	4312_03.raw	37	2	3	2	2
1	2	P02452|CO1A1_HUMAN	R.GLP(+15.99)GPP(+15.99)GAP(+15.99)GPQGFQGPP(+15.99)GEP(+15.99)GEP(+15.99)GASGP(+15.99)MGPR.G	Y	80.54	3115.3938	33	2.0	1039.4740	3	33.69	1.64E8	1.5431E8	1.5027E8	8.5394E7	8.5401E7	1.3018E8	1.3183E8	1.137E8	9.1471E7	1.0266E8	9.9424E7	2.3265E7		2.074E7		1.27E7	1.2715E7	2.6941E7	3.0333E7	2.5864E7	1.1734E8	1.7172E8	1.7237E7	1.6773E7		8.4556E7	8.4751E7	8.1518E7			7	F7:10984	3849_02.raw	33	2	1	2	1
1	2	P02452|CO1A1_HUMAN	R.GLTGPIGP(+15.99)PGPAGAP(+15.99)GDKGESGPSGPAGPTGAR.G	Y	80.31	2868.4001	33	1.3	718.1083	4	30.53					4.3796E7		7.0175E6							9.0843E6								2.5658E7	6.4735E6			1.1097E7					26	F26:9769	6401_01.raw	6	0	0	0	0
1	2	P02452|CO1A1_HUMAN	R.GETGPAGPP(+15.99)GAP(+15.99)GAPGAPGPVGPAGK.S	Y	79.88	2152.0547	26	2.9	1077.0377	2	25.90	1.379E7	1.2415E7				1.301E7	3.7809E7			2.325E7			6.8793E6													1.1864E7	1.0196E7				1	F1:8195	3399_01.raw	8	1	1	0	0
1	2	P02452|CO1A1_HUMAN	R.GLTGPIGP(+15.99)P(+15.99)GPAGAP(+15.99)GDKGESGPSGPAGPTGAR.G	Y	79.55	2884.3950	33	2.1	962.4743	3	28.49	2.1629E7	1.966E7	1.7724E7			1.1926E7	1.1481E7	1.266E7				1.3302E7		0							1.3455E7	1.6983E7	9.3439E6	8.5817E6	9.0393E6	1.0973E7	1.1515E7	1.0873E7			2	F2:9208	3399_02.raw	15	1	1	1	0
1	2	P02452|CO1A1_HUMAN	R.GLTGPIGPP(+15.99)GP(+15.99)AGAP(+15.99)GDKGESGPSGPAGPTGAR.G	Y	79.30	2884.3950	33	4.6	962.4767	3	30.37	1.8807E8	1.5562E8	1.7291E8	1.3991E8	1.1649E8	1.2095E8	1.0842E8	1.0714E8	9.1846E7	9.6741E7	1.0295E8	1.3302E7	1.2401E7	1.311E7	1.0721E7	9.6037E6			2.2822E7	2.3754E7	1.347E8	1.6401E8	1.8185E7	1.7043E7	1.7504E7	9.6535E7	1.0037E8	8.6662E7	3.9169E6	3.5877E6	29	F29:9592	6474_01.raw	37	2	1	1	2
1	2	P02452|CO1A1_HUMAN	K.DGEAGAQGPPGPAGP(+15.99)AGERGEQGPAGSP(+15.99)GFQGLP(+15.99)GPAGPP(+15.99)GEAGKP(+15.99)GEQGVP(+15.99)GDLGAP(+15.99)GPSGAR.G	Y	78.56	5799.6655	64	-1.5	1160.9386	5	36.11																												3.3155E7			28	F28:11763	6401_03.raw	1	0	0	0	0
1	2	P02452|CO1A1_HUMAN	K.GDRGETGPAGPP(+15.99)GAP(+15.99)GAPGAPGPVGPAGK.S	Y	78.46	2480.2043	29	0.7	827.7426	3	23.74																						9.7246E7									22	F22:7367	5289_03_r.raw	1	0	0	0	0
1	2	P02452|CO1A1_HUMAN	K.GDRGETGPAGPP(+15.99)GAPGAPGAP(+15.99)GPVGPAGK.S	Y	78.45	2480.2043	29	0.7	827.7427	3	23.90	9.3449E7	9.577E7		4.9895E7	5.2046E7	6.7841E7	6.3272E7	6.3897E7	6.1819E7					5.5687E6							7.0136E7	9.7246E7				6.5514E7	6.2907E7				26	F26:7255	6401_01.raw	13	1	1	0	1
1	2	P02452|CO1A1_HUMAN	R.GPP(+15.99)GP(+15.99)MGPPGLAGPP(+15.99)GESGR.E	Y	78.10	1831.8522	20	0.1	916.9335	2	26.90	3.7356E8	3.4403E8	3.8209E8	2.1716E8	2.1172E8	2.3722E8	2.2316E8	2.1301E8	2.459E8	2.5621E8	2.3984E8	4.2261E7	4.2589E7	4.1677E7	2.4481E7	2.3781E7	2.2651E7	4.0945E7	4.5375E7	4.5303E7	2.3379E8	3.1845E8	2.5974E7	1.0882E7	1.1108E7	1.8599E8	1.8928E8	1.8921E8	1.5793E6	1.3485E6	2	F2:8668	3399_02.raw	56	2	2	2	2
1	2	P02452|CO1A1_HUMAN	R.GEP(+15.99)GP(+15.99)PGPAGAAGPAGNP(+15.99)GADGQPGAK.G	Y	78.02	2299.0464	27	0.6	1150.5311	2	20.17													1.2883E6							7.9818E6											13	F13:5728	4371_02.raw	2	0	0	0	0
1	2	P02452|CO1A1_HUMAN	R.GFSGLQGPP(+15.99)GPPGSPGEQGPSGASGPAGPR.G	Y	77.80	2672.2578	30	2.5	891.7621	3	35.41				6.8008E6	8.1958E6	3.7984E6				5.2734E6																					5	F5:11784	3484_03_r.raw	4	0	0	0	1
1	2	P02452|CO1A1_HUMAN	R.VGPP(+15.99)GPSGNAGPP(+15.99)GPP(+15.99)GPAGK.E	Y	77.73	1811.8801	21	0.7	906.9479	2	20.69	1.2529E9	1.1752E9	1.2744E9	6.2993E8	6.5846E8	7.9239E8	7.69E8	7.5514E8	3.4418E8	3.521E8	7.8196E8	5.6523E7	6.0959E7	5.6089E7	4.6614E7	1.139E8	4.2437E7	1.4497E8	5.7115E7	6.705E7	5.7307E8	7.5579E8	1.5478E8	1.4886E8	1.4729E8	5.6492E8	2.2835E8	1.9458E8	6.2108E6	4.7482E6	7	F7:5964	3849_02.raw	47	2	2	2	2
1	2	P02452|CO1A1_HUMAN	K.GDRGETGPAGPP(+15.99)GAPGAP(+15.99)GAP(+15.99)GPVGPAGK.S	Y	77.51	2496.1992	29	-1.0	833.0729	3	22.04		2.8937E8				2.1062E8		1.8949E8		0		2.2663E7									2.1111E8	2.8964E8				1.723E8					26	F26:6645	6401_01.raw	7	0	1	0	0
1	2	P02452|CO1A1_HUMAN	R.GPP(+15.99)GP(+15.99)MGPPGLAGPPGESGR.E	Y	77.50	1815.8573	20	2.7	908.9384	2	28.29	5.3578E7	4.7349E7	5.581E7	4.1466E7	1.9918E7	1.424E7	7.7808E6	8.6894E6	5.9491E7	2.0741E7	3.7753E7							9.191E5		0	2.7928E7	2.0579E7				8.5721E6	9.1235E6	1.835E7			11	F11:9536	4312_03.raw	30	2	2	2	2
1	2	P02452|CO1A1_HUMAN	R.VGP(+15.99)P(+15.99)GPSGNAGPP(+15.99)GPP(+15.99)GPAGK.E	Y	77.33	1827.8750	21	0.3	914.9450	2	18.93	3.0443E8	2.7437E8	3.0901E8	2.483E8	2.6302E8	2.3803E8	2.4831E8	2.282E8	2.2242E8	2.2478E8	2.4223E8	5.3963E7	5.607E7	5.1741E7	2.3371E7	2.3431E7	5.7126E7	6.1505E7	6.3782E7	6.4901E7	1.7467E8	2.6053E8	8.1591E7	7.1219E7	7.0189E7	6.7172E7	1.7866E8	1.8015E8	8.3465E6	3.0201E6	7	F7:5529	3849_02.raw	56	2	2	2	2
1	2	P02452|CO1A1_HUMAN	R.GETGPAGPP(+15.99)GAP(+15.99)GAPGAP(+15.99)GPVGPAGK.S	Y	77.33	2168.0496	26	1.5	1085.0337	2	24.16	1.7968E8	1.408E8	1.9924E8	1.4979E8	1.6126E8	1.0716E8	8.7458E7	9.2937E7	2.0867E8	2.3103E8	2.2839E8	5.2425E6	1.9111E7	1.6352E7	1.2162E7	1.7512E7	1.7501E7		1.9416E7	1.9711E7	1.3929E7	1.2192E8		1.5926E7	1.5033E7	1.3454E8	1.3175E8	1.3073E8			9	F9:7617	4312_01.raw	39	2	1	2	2
1	2	P02452|CO1A1_HUMAN	R.GFSGLQGPPGP(+15.99)PGSPGEQGPSGASGPAGPR.G	Y	76.49	2672.2578	30	-0.3	891.7596	3	35.42	8.4361E6																				4.6963E6					2.8077E6	3.1086E6				1	F1:11817	3399_01.raw	4	1	0	0	0
1	2	P02452|CO1A1_HUMAN	R.GFSGLQGPP(+15.99)GP(+15.99)PGSP(+15.99)GEQGPSGASGPAGPR.G	Y	76.22	2704.2476	30	2.3	902.4252	3	34.05					3.7371E8			3.5803E8			0	4.752E7														1.065E7			1.0951E7		12	F12:11107	4371_01.raw	6	0	0	0	0
1	2	P02452|CO1A1_HUMAN	R.GETGPAGRP(+15.99)GEVGPP(+15.99)GP(+15.99)P(+15.99)GPAGEK.G	Y	75.89	2231.0454	24	2.6	744.6910	3	16.87	8.0164E7	7.7553E7	1.401E8	4.411E7	4.7392E7	9.9682E7	9.895E7	9.0317E7	6.7552E7	6.3803E7	7.175E7	3.5678E7	3.4342E7	3.2284E7	2.1595E7	1.9938E7	1.8867E7	2.3146E7	2.3022E7	2.3432E7	6.2787E7	8.843E7	1.5402E7	1.4813E7	1.4282E7	4.844E7	5.1933E7	4.6779E7			24	F24:4490	6313_02.raw	29	1	1	2	1
1	2	P02452|CO1A1_HUMAN	K.DGEAGAQGPPGP(+15.99)AGPAGERGEQGPAGSP(+15.99)GFQGLP(+15.99)GPAGPP(+15.99)GEAGKP(+15.99)GEQGVPGDLGAP(+15.99)GPSGAR.G	Y	75.38	5783.6704	64	-1.2	1157.7400	5	37.68	0	0	3.0479E7								0											3.0096E7									2	F2:12564	3399_02.raw	2	0	0	1	0
1	2	P02452|CO1A1_HUMAN	R.GFSGLQGPPGPP(+15.99)GSPGEQGPSGASGPAGPR.G	Y	74.94	2672.2578	30	-0.1	891.7598	3	35.37		4.8684E6	4.9501E6																												2	F2:11707	3399_02.raw	2	0	1	1	0
1	2	P02452|CO1A1_HUMAN	R.GPSGPQGPGGPP(+15.99)GP(+15.99)KGNSGEP(+15.99)GAP(+15.99)GSK.G	Y	74.91	2388.0940	27	2.3	797.0404	3	14.75	3.6965E6	3.167E6	4.7326E6																		9.3954E5					0	0				3	F3:3855	3399_03.raw	4	1	1	1	0
1	2	P02452|CO1A1_HUMAN	K.GEP(+15.99)GPVGVQGPP(+15.99)GPAGEEGK.R	Y	74.90	1846.8696	20	1.2	924.4432	2	23.67	1.7256E9	1.6862E9	1.7826E9	1.0214E9	1.0371E9	8.1265E8	7.5549E8	7.8667E8	1.1028E9	1.1028E9	1.1893E9	2.1008E8	2.0432E8	1.7663E8	1.6059E8	1.6256E8	1.5823E8	2.441E8	2.4155E8	2.4555E8	1.1865E9	1.6694E9	2.1406E8	1.9287E8	2.0238E8	9.899E8	9.5209E8	9.1801E8	8.1121E7	7.7044E7	24	F24:7117	6313_02.raw	66	4	2	3	3
1	2	P02452|CO1A1_HUMAN	R.GETGPAGRP(+15.99)GEVGPP(+15.99)GPP(+15.99)GP(+15.99)AGEK.G	Y	74.85	2231.0454	24	-0.7	1116.5292	2	19.15	2.531E8	2.4715E8	2.5104E8	1.675E8	1.6936E8	1.9868E8	2.0013E8	1.8552E8	1.5267E8	1.5546E8	1.7234E8	2.6032E7	2.6463E7	2.264E7	2.8688E7	2.2781E7	2.5388E7	3.7699E7	3.7711E7	3.8571E7	1.5962E8	2.1794E8	3.0086E7	2.6547E7	2.7781E7	1.3936E8	1.4396E8	1.3395E8		7.7516E6	7	F7:5494	3849_02.raw	40	2	2	2	1
1	2	P02452|CO1A1_HUMAN	R.GEP(+15.99)GPP(+15.99)GPAGAAGP(+15.99)AGNP(+15.99)GADGQP(+15.99)GAK.G	Y	74.39	2331.0361	27	-0.2	1166.5251	2	16.95	1.3658E8	1.1875E8	1.3085E8	4.0674E7	4.4392E7	7.4754E7	7.8155E7	7.448E7	5.0761E7	5.4294E7	5.7123E7	1.2301E7	1.1354E7		8.0307E6			0	2.468E6	4.7031E6	6.2317E7	6.4508E7	8.9175E6	8.524E6		4.5371E7	4.2581E7	2.8055E7	1.5052E6		7	F7:4626	3849_02.raw	57	4	4	4	3
1	2	P02452|CO1A1_HUMAN	R.VGP(+15.99)P(+15.99)GPSGNAGPP(+15.99)GP(+15.99)P(+15.99)GPAGK.E	Y	74.35	1843.8699	21	-0.7	922.9415	2	17.10	6.9769E7	6.0617E7	7.128E7	5.3187E7	5.8059E7	9.4237E7	8.8561E7	7.5956E7	7.5144E7	7.8125E7	8.1098E7	3.0941E7	2.5098E7	2.4396E7	9.6597E6	9.9041E6	9.7541E6	1.3968E7	2.2584E7	1.238E7	5.2752E7	7.1248E7	1.9576E7	2.0609E7	1.6708E7	4.6099E7	5.1531E7	5.1378E7	2.0419E6	1.4639E6	7	F7:4662	3849_02.raw	53	2	2	2	2
1	2	P02452|CO1A1_HUMAN	K.DGEAGAQGPP(+15.99)GPAGPAGERGEQGPAGSP(+15.99)GFQGLP(+15.99)GPAGP(+15.99)PGEAGKP(+15.99)GEQGVPGDLGAP(+15.99)GPSGAR.G	Y	74.03	5783.6704	64	0.3	1446.9253	4	37.79		0																			0										2	F2:12606	3399_02.raw	0	0	0	0	0
1	2	P02452|CO1A1_HUMAN	K.DGEAGAQGPPGP(+15.99)AGPAGERGEQGPAGSP(+15.99)GFQGLP(+15.99)GP(+15.99)AGPP(+15.99)GEAGKP(+15.99)GEQGVP(+15.99)GDLGAP(+15.99)GPSGAR.G	Y	73.96	5815.6602	64	-0.2	1164.1390	5	34.17			0																		0	1.5424E7									22	F22:11263	5289_03_r.raw	1	0	0	0	0
1	2	P02452|CO1A1_HUMAN	K.DGEAGAQGP(+15.99)P(+15.99)GPAGPAGER.G	Y	73.68	1721.7604	19	-0.3	861.8872	2	16.99	2.0851E7	2.0102E7	2.3654E7	9.2764E6	9.2957E6	2.9499E7	2.946E7	2.6105E7	1.7811E7	1.8231E7	1.8877E7	1.074E7	9.0761E6	8.1166E6		6.5786E6		5.2238E6			1.0881E7	2.0457E7	2.7844E6	3.0688E6			9.0911E6	8.1413E6		1.884E6	7	F7:4664	3849_02.raw	24	1	1	1	1
1	2	P02452|CO1A1_HUMAN	K.GDRGETGPAGPP(+15.99)GAPGAPGAPGPVGPAGK.S	Y	73.60	2464.2095	29	3.5	822.4133	3	25.78	6.7763E6	6.6747E6	7.1213E6	3.7776E6	3.2826E6	5.0441E6		4.2151E6		5.5476E6	5.9566E6										5.5805E6					5.8998E6	4.786E6	0			2	F2:8213	3399_02.raw	12	1	1	1	1
1	2	P02452|CO1A1_HUMAN	K.DGEAGAQGPPGPAGPAGER.G	Y	73.52	1689.7706	19	0.3	845.8928	2	20.58	2.1238E8	1.9723E8	2.1073E8	1.2079E8	1.1939E8	1.284E8	1.2816E8	1.2882E8	1.7673E8	1.7642E8	1.877E8	1.5481E7	1.6635E7	1.5127E7	6.7174E6	7.7393E6	6.8267E6	2.1769E7	2.0314E7	2.1241E7	1.1103E8	1.5788E8	8.3984E6	7.7706E6	7.8195E6	9.9318E7	9.5869E7	9.4715E7	1.8094E6	1.4901E6	7	F7:6204	3849_02.raw	47	2	2	2	2
1	2	P02452|CO1A1_HUMAN	A.TGAAGPP(+15.99)GPTGPAGPP(+15.99)GFP(+15.99)GAVGAK.G	Y	73.48	2133.0488	25	3.7	1067.5356	2	32.16	8.4861E6	6.858E6	7.6127E6	1.8408E7	1.789E7	1.1128E7	8.5091E6	1.3462E7	2.1876E7	2.4869E7	2.3345E7								1.1489E6		4.8184E6	7.0591E6				1.55E7	1.4515E7	1.5672E7			11	F11:10649	4312_03.raw	27	1	1	1	2
1	2	P02452|CO1A1_HUMAN	K.DGEAGAQGP(+15.99)PGPAGPAGERGEQGPAGSP(+15.99)GFQGLP(+15.99)GPAGPP(+15.99)GEAGKP(+15.99)GEQGVP(+15.99)GDLGAP(+15.99)GPSGAR.G	Y	73.18	5799.6655	64	-0.6	1160.9397	5	36.01	0	1.0396E8																				1.3023E8									22	F22:11912	5289_03_r.raw	3	0	2	0	0
1	2	P02452|CO1A1_HUMAN	R.GLTGPIGPP(+15.99)GPAGAP(+15.99)GDKGESGP(+15.99)SGPAGPTGAR.G	Y	73.15	2884.3950	33	1.5	962.4738	3	31.60	1.8807E8	1.7434E8	1.93E8	1.2666E8	1.3038E8		1.014E8	1.0196E8	8.8862E7	9.6741E7	9.7396E7							1.9963E7	2.2822E7		1.225E8	1.8645E8				9.6535E7		9.6639E7			7	F7:10292	3849_02.raw	22	2	2	2	1
1	2	P02452|CO1A1_HUMAN	R.GFSGLQGPP(+15.99)GP(+15.99)PGSPGEQGPSGASGPAGPR.G	Y	72.95	2688.2527	30	1.9	1345.1362	2	35.42						8.093E6		6.3691E7																	4.6141E6		5.9824E7				6	F6:11640	3849_01.raw	4	0	0	0	0
1	2	P02452|CO1A1_HUMAN	R.GETGPAGPP(+15.99)GAPGAPGAP(+15.99)GPVGPAGK.S	Y	72.91	2152.0547	26	1.7	1077.0365	2	25.94			5.596E7	5.8282E7				3.6032E7		9.436E7	7.2833E7										2.833E7	3.6633E7				3.9945E7	4.1664E7	4.1984E7			4	F4:8137	3484_02.raw	12	0	0	1	2
1	2	P02452|CO1A1_HUMAN	R.GLTGPIGP(+15.99)P(+15.99)GP(+15.99)AGAP(+15.99)GDKGESGPSGPAGPTGAR.G	Y	72.90	2900.3899	33	0.2	967.8041	3	29.82	2.1515E7	2.0328E7		1.2791E7	1.2264E7	2.5289E7	2.3759E7	2.4098E7		1.523E7	1.577E7	4.9226E6	3.9738E6	4.6981E6				4.4411E6	4.4942E6	4.6366E6	1.9541E7	2.4887E7	3.5699E6	2.6664E6		1.2405E7	1.1901E7	1.0136E7			7	F7:9631	3849_02.raw	22	1	1	0	1
1	2	P02452|CO1A1_HUMAN	R.GEQGPAGSP(+15.99)GFQGLP(+15.99)GP(+15.99)AGPP(+15.99)GEAGK.P	Y	72.83	2380.0930	26	0.8	1191.0547	2	29.44						3.7652E6	5.0613E6	5.1147E6	4.6369E6	5.4227E6																					9	F9:9511	4312_01.raw	5	0	0	0	0
1	2	P02452|CO1A1_HUMAN	R.GLTGPIGP(+15.99)P(+15.99)GPAGAP(+15.99)GDKGESGP(+15.99)SGPAGPTGAR.G	Y	72.75	2900.3899	33	0.9	967.8048	3	28.38	2.1515E7	2.0328E7	2.0124E7					2.4098E7	1.4987E7												1.9541E7	2.4887E7									2	F2:9134	3399_02.raw	7	1	1	1	0
1	2	P02452|CO1A1_HUMAN	D.RGETGPAGPP(+15.99)GAP(+15.99)GAP(+15.99)GAP(+15.99)GPVGPAGK.S	Y	72.68	2340.1458	27	1.2	781.0568	3	19.45	1.8963E7	1.6798E7	1.8767E7	1.182E7	1.1051E7	1.4447E7	1.5368E7	1.4659E7	2.2338E7	2.2353E7	2.3914E7	2.3889E6			3.6813E6		4.104E6	3.1298E6	2.8021E6	2.6224E6	1.1106E7	1.504E7		2.1785E6		6.4535E6	6.5026E6	6.0531E6			11	F11:5752	4312_03.raw	23	1	1	1	1
1	2	P02452|CO1A1_HUMAN	K.DGEAGAQGPP(+15.99)GPAGPAGER.G	Y	72.26	1705.7655	19	1.3	853.8911	2	17.79	1.4104E9	1.3394E9	1.4225E9	8.347E8	8.5184E8	1.0763E9	1.0993E9	1.0373E9	9.7539E8	9.599E8	1.0239E9	2.0492E8	2.1418E8	2.0455E8	1.6543E8	1.5373E8	1.6417E8	2.2558E8	2.2805E8	2.3124E8	7.8384E8	1.1317E9	1.5823E8	1.439E8	1.4447E8	7.1554E8	7.206E8	7.0409E8	4.2589E7	4.222E7	9	F9:4902	4312_01.raw	71	3	2	2	2
1	2	P02452|CO1A1_HUMAN	K.GEPGPVGVQGPP(+15.99)GPAGEEGK.R	Y	72.25	1830.8748	20	1.7	916.4462	2	25.54	2.172E7	2.1165E7	3.7477E7	1.9144E7	2.7667E7				1.6365E7	1.652E7	2.6558E7							1.8713E6	2.1514E6	1.5403E6	9.1608E6	9.9551E6					4.2436E6				9	F9:8081	4312_01.raw	17	1	1	2	1
1	2	P02452|CO1A1_HUMAN	R.VGP(+15.99)P(+15.99)GPSGNAGP(+15.99)P(+15.99)GP(+15.99)P(+15.99)GPAGK.E	Y	72.07	1859.8647	21	-0.1	930.9396	2	15.92	1.5876E7	1.5716E7	1.5224E7	6.1228E6	4.7329E6	5.9564E7	6.3073E7	1.8461E7	3.2308E7	4.0537E7	4.5451E7	6.4714E6	1.6176E7	5.9385E6	3.7661E6	3.5878E6	3.2926E6	3.7008E6	3.3453E6	3.2931E6	7.1494E6	3.8449E7	1.9711E6	1.6939E6	1.8034E6	6.9853E6	6.2222E6	5.5295E6		7.2931E5	7	F7:4226	3849_02.raw	36	1	1	1	1
1	2	P02452|CO1A1_HUMAN	R.GFSGLQGPP(+15.99)GP(+15.99)P(+15.99)GSP(+15.99)GEQGPSGASGPAGPR.G	Y	71.79	2720.2424	30	1.0	907.7556	3	30.70					6.9564E7		5.5088E7				6.2426E7																				11	F11:10143	4312_03.raw	3	0	0	0	0
1	2	P02452|CO1A1_HUMAN	R.GFSGLQGP(+15.99)P(+15.99)GP(+15.99)PGSP(+15.99)GEQGPSGASGPAGPR.G	Y	71.66	2720.2424	30	1.8	907.7564	3	30.90	5.0179E7	5.0592E7	5.0422E7	6.6581E7	6.9564E7	6.2641E7		5.4802E7	5.5473E7	6.807E7	6.2426E7		0					0				7.7292E7				4.4457E7	4.101E7				10	F10:10094	4312_02.raw	13	1	1	1	1
1	2	P02452|CO1A1_HUMAN	K.GDAGPP(+15.99)GPAGPAGPP(+15.99)GP(+15.99)IGNVGAP(+15.99)GAK.G	Y	71.60	2296.1082	27	2.1	1149.0637	2	30.51	5.351E8	5.7436E8	5.954E8	2.2542E8	2.4025E8	2.4791E8	2.608E8	2.6109E8	2.8491E8	3.2247E8	1.7281E8	4.6194E7	3.9254E7	3.6172E7	2.9971E7	2.947E7	3.4275E7	3.387E7	3.7153E7	3.8347E7	3.5837E8	2.3296E8	5.5428E7	4.6147E7	3.7383E7	1.4844E8	2.4602E8	2.2561E8		4.3225E6	7	F7:10002	3849_02.raw	83	3	3	3	3
1	2	P02452|CO1A1_HUMAN	R.GPP(+15.99)GP(+15.99)MGPP(+15.99)GLAGPP(+15.99)GESGR.E	Y	71.09	1847.8470	20	2.6	924.9332	2	26.41	6.0847E8	5.625E8	6.5574E8	3.789E8	3.7702E8	4.3318E8	4.0452E8	4.2035E8	3.5471E8	3.6753E8	3.6073E8	1.3022E8	1.201E8	6.1829E7	4.731E7	4.5071E7	4.5759E7	6.28E7	1.2533E8	6.251E7	4.329E8	5.5551E8	8.7085E7	7.3137E7	7.4889E7	3.106E8	3.2091E8	3.0673E8	1.2132E7	7.4256E6	7	F7:8274	3849_02.raw	54	2	3	2	2
1	2	P02452|CO1A1_HUMAN	R.GLTGPIGPP(+15.99)GPAGAP(+15.99)GDK.G	Y	71.09	1589.8048	18	1.4	795.9108	2	30.56	2.1268E9	1.8761E9	1.9978E9	1.444E9	1.4233E9	1.3226E9	1.2176E9	1.2073E9	1.2688E9	1.325E9	1.319E9	2.144E8	2.2008E8	1.9305E8	1.7876E8	1.5608E8	1.9961E8	2.4579E8	2.9493E8	2.8387E8	1.37E9	1.946E9	1.678E8	1.5669E8	1.3815E8	1.0851E9	1.058E9	1.0602E9	4.6193E7	4.6203E7	7	F7:9827	3849_02.raw	54	2	2	2	2
1	2	P02452|CO1A1_HUMAN	R.GAP(+15.99)GDRGEP(+15.99)GP(+15.99)PGPAGFAGPP(+15.99)GADGQP(+15.99)GAK.G	Y	71.06	2718.2268	30	1.0	907.0837	3	24.56		2.899E8	3.3307E8		1.3807E8					1.2648E8		3.1644E7	3.5056E7	2.809E7	1.7266E7					4.3031E7	2.5574E8		4.5809E7	4.337E7	4.1513E7	9.6546E6	1.5441E8	1.6528E8	1.0849E7	1.1145E7	10	F10:7674	4312_02.raw	18	0	1	1	0
1	2	P02452|CO1A1_HUMAN	R.GEQGPAGSP(+15.99)GFQGLPGP(+15.99)AGPP(+15.99)GEAGKP(+15.99)GEQGVPGDLGAP(+15.99)GPSGAR.G	Y	71.03	4095.9155	45	2.0	1366.3152	3	37.86	8.9348E6	9.6325E6	1.0822E8	6.7556E7								1.2819E7	1.2137E7	9.8742E6							6.8651E7										4	F4:12840	3484_02.raw	9	1	1	2	1
1	2	P02452|CO1A1_HUMAN	K.GDAGPP(+15.99)GPAGPAGP(+15.99)P(+15.99)GPIGNVGAP(+15.99)GAK.G	Y	70.68	2296.1082	27	2.2	766.3784	3	28.18	1.837E8	2.1161E8		6.0481E7		4.1079E7	1.1478E8	1.187E8	1.3348E8	1.4336E8						1.2511E7			9.2814E6		1.3115E8	1.5765E8						1.0894E8			22	F22:9164	5289_03_r.raw	13	1	1	0	1
1	2	P02452|CO1A1_HUMAN	R.GETGPAGP(+15.99)PGAP(+15.99)GAP(+15.99)GAP(+15.99)GPVGPAGK.S	Y	70.05	2184.0444	26	1.2	729.0229	3	21.80			3.0977E8	2.1138E8					2.6845E8	2.8493E8	2.8643E8		6.4089E7					5.2725E7	5.6477E7		1.5001E8				4.932E7		1.8575E8				3	F3:6678	3399_03.raw	11	0	0	1	1
1	2	P02452|CO1A1_HUMAN	R.GFSGLQGP(+15.99)PGP(+15.99)P(+15.99)GSP(+15.99)GEQGPSGASGPAGPR.G	Y	68.65	2720.2424	30	2.3	907.7568	3	32.10			5.0422E7	6.6581E7		6.2641E7	5.5088E7	5.4802E7													6.239E7	7.7292E7	1.5399E7					4.2704E7			7	F7:10505	3849_02.raw	9	0	0	1	1
1	2	P02452|CO1A1_HUMAN	K.GDRGETGPAGP(+15.99)PGAPGAPGAP(+15.99)GPVGPAGK.S	Y	68.04	2480.2043	29	1.9	827.7437	3	23.72			9.9569E7															1.1011E7													3	F3:7336	3399_03.raw	2	0	0	1	0
1	2	P02452|CO1A1_HUMAN	K.GDAGPP(+15.99)GP(+15.99)AGPAGPP(+15.99)GPIGNVGAP(+15.99)GAK.G	Y	67.86	2296.1082	27	1.9	766.3781	3	29.12											1.9654E7										1.7153E8	1.5765E8									11	F11:9579	4312_03.raw	3	0	0	0	0
1	2	P02452|CO1A1_HUMAN	K.P(+15.99)GEQGVP(+15.99)GDLGAP(+15.99)GPSGAR.G	Y	67.72	1765.8230	19	-2.2	883.9168	2	23.54	1.2132E8	1.0844E8	1.2431E8	1.4563E8	1.5128E8	1.7247E8	1.6212E8	1.5387E8	1.5704E8	1.6406E8	1.6331E8	1.8593E7	2.0332E7	2.0139E7	2.9929E7	2.244E7	2.5946E7	2.7994E7	3.1321E7	2.7845E7	5.0762E7	6.8723E7	7.1892E6	7.1316E6	6.4689E6	1.0297E8	9.9261E7	9.8162E7	5.5367E6	4.2455E6	7	F7:7291	3849_02.raw	50	2	2	2	2
1	2	P02452|CO1A1_HUMAN	R.VGP(+15.99)P(+15.99)GPSGNAGP(+15.99)PGP(+15.99)P(+15.99)GPAGK.E	Y	67.63	1843.8699	21	1.8	922.9438	2	16.63	3.7689E7	3.2757E7			3.699E7	5.0654E7	4.0805E7	3.5735E7	4.003E7	3.7165E7	4.4625E7					9.9041E6						2.7284E7			1.6708E7		2.9777E7	3.1769E7		1.4639E6	10	F10:4613	4312_02.raw	16	1	1	0	0
1	2	P02452|CO1A1_HUMAN	K.DGEAGAQGP(+15.99)PGPAGPAGERGEQGPAGSP(+15.99)GFQGLP(+15.99)GP(+15.99)AGP(+15.99)PGEAGKP(+15.99)GEQGVP(+15.99)GDLGAP(+15.99)GPSGAR.G	Y	67.63	5815.6602	64	0.3	1164.1396	5	35.60							0															0									7	F7:11668	3849_02.raw	0	0	0	0	0
1	2	P02452|CO1A1_HUMAN	K.TGPP(+15.99)GPAGQDGRP(+15.99)GPP(+15.99)GPP(+15.99)GAR.G	Y	67.32	2055.9722	22	-0.6	686.3309	3	16.49	1.6957E9	1.8167E9	1.7851E9	1.0237E9	9.7748E8	1.217E9	1.3112E9	1.2142E9	1.0249E9	9.7801E8	1.0224E9	2.1546E8	2.2271E8	2.074E8	1.5465E8	1.4015E8	1.4142E8	2.6741E8	2.861E8	2.7355E8	9.5758E8	1.3028E9	2.1156E8	1.9049E8	1.9311E8	9.0574E8	9.511E8	8.9686E8	5.9962E7	4.8465E7	7	F7:4326	3849_02.raw	43	1	2	3	2
1	2	P02452|CO1A1_HUMAN	R.GLTGPIGPP(+15.99)GPAGAPGDK.G	Y	67.09	1573.8099	18	2.3	787.9141	2	32.32	1.9863E8	1.959E8	1.996E8	1.4908E8	1.4483E8	7.4669E7	6.8212E7	6.849E7	1.2836E8	1.4151E8	1.4091E8	1.0737E7	1.1538E7	9.9844E6	3.4548E6	4.0992E6	4.4899E6	1.7125E7	1.6654E7	1.7715E7	1.0955E8	1.621E8	8.4276E6	8.2342E6	8.2761E6	6.8935E7	6.9686E7	6.537E7	1.2128E6		7	F7:10440	3849_02.raw	33	1	2	2	2
1	2	P02452|CO1A1_HUMAN	K.GEP(+15.99)GPVGVQGP(+15.99)P(+15.99)GPAGEEGK.R	Y	67.08	1862.8645	20	5.4	932.4445	2	21.04	2.6283E7	2.3928E7	2.4619E7	9.3058E6	1.3481E7	1.7571E7	3.6526E7	4.4904E7	2.1238E7	2.0971E7	2.0619E7	8.698E6	1.0776E7	1.0247E7	1.0972E7	1.7063E7	1.635E7	5.8452E6	9.5615E6	6.7308E6	1.6582E7	3.731E7	3.226E6	2.8502E6	0	1.2496E7	1.3916E7	1.202E7	5.2362E6	4.1358E6	11	F11:6436	4312_03.raw	31	1	1	1	1
1	2	P02452|CO1A1_HUMAN	R.GFSGLQGP(+15.99)PGPP(+15.99)GSPGEQGPSGASGPAGPR.G	Y	67.04	2688.2527	30	1.9	1345.1361	2	34.15																					9.3634E6										21	F21:10921	5289_01.raw	1	0	0	0	0
1	2	P02452|CO1A1_HUMAN	R.GSAGPP(+15.99)GATGFP(+15.99)GAAGR.V	Y	67.04	1458.6851	17	2.4	730.3516	2	22.62	2.3094E9	2.0795E9	2.3132E9	1.4122E9	1.3916E9	1.7379E9	1.6878E9	1.486E9	1.2593E9	1.3446E9	1.3187E9	2.5517E8	2.7046E8	2.2598E8	2.1336E8	1.9555E8	1.8584E8	3.0447E8	2.9946E8	2.9523E8	1.4475E9	1.9252E9	2.5817E8	2.3956E8	2.2271E8	1.1371E9	1.1269E9	1.0903E9	6.768E7	6.3808E7	24	F24:6739	6313_02.raw	50	3	2	2	2
1	2	P02452|CO1A1_HUMAN	R.GVP(+15.99)GPPGAVGPAGK.D	Y	66.93	1175.6298	14	-2.4	588.8207	2	21.85	6.8317E8	6.7477E8	7.0934E8	4.0248E8	4.4868E8	4.4908E8	4.3293E8	4.0265E8	4.6794E8	4.4303E8	4.6502E8	4.988E7	5.8395E7	1.6228E7	2.2344E7	2.2704E7	9.9414E6	6.6933E7	7.7833E7	2.5642E7	4.2069E8	6.0088E8	5.8766E7	4.9046E7	5.5192E7	3.3974E8	3.4153E8	3.2673E8			7	F7:6891	3849_02.raw	50	2	2	2	2
1	2	P02452|CO1A1_HUMAN	R.GPP(+15.99)GP(+15.99)MGPP(+15.99)GLAGPPGESGR.E	Y	66.87	1831.8522	20	2.4	916.9355	2	26.85		3.4403E8	3.8209E8	1.096E8	9.8036E7	1.0512E8	8.9367E7														1.1143E8	1.4638E8				9.8098E7					3	F3:8802	3399_03.raw	11	0	2	2	1
1	2	P02452|CO1A1_HUMAN	R.GPSGPQGPGGPP(+15.99)GPK.G	Y	66.72	1301.6364	15	-0.5	651.8251	2	16.13	1.2496E9	1.1797E9	1.2473E9	5.8095E8	5.2692E8	4.9232E8	5.3685E8	4.481E8	6.2631E8	6.5455E8	7.1938E8	1.4239E8	1.4418E8	1.2808E8	7.7276E7	7.5267E7	7.4213E7	1.4413E8	1.4425E8	1.3765E8	6.1727E8	7.798E8	1.2425E8	1.2209E8	1.1605E8	5.3889E8	5.7756E8	5.2848E8	2.7042E6	2.1549E6	7	F7:4346	3849_02.raw	33	1	1	1	1
1	2	P02452|CO1A1_HUMAN	K.GDRGETGPAGP(+15.99)PGAP(+15.99)GAP(+15.99)GAP(+15.99)GPVGPAGK.S	Y	66.63	2512.1941	29	2.6	838.4075	3	21.22	1.9214E7	0		2.8823E8		4.5313E8									6.2129E7		5.4931E7		1.0211E8	9.9914E7		4.8455E8	1.0525E8				3.0177E8			2.2817E7	17	F17:6426	4406_03.raw	11	1	0	0	1
1	2	P02452|CO1A1_HUMAN	R.GLP(+15.99)GP(+15.99)PGAP(+15.99)GPQGFQGPP(+15.99)GEP(+15.99)GEP(+15.99)GASGP(+15.99)MGPR.G	Y	66.37	3115.3938	33	0.0	1039.4719	3	32.42	1.5655E8				8.5401E7	4.8257E7	1.0846E8	1.137E8	9.1471E7	9.6453E7		2.3265E7	2.5787E7	2.074E7	1.3131E7			2.6941E7	3.0333E7	2.5864E7	1.0537E7	1.8642E8			1.5512E7			1.6541E7	0	8.6091E6	10	F10:10784	4312_02.raw	21	1	0	0	0
1	2	P02452|CO1A1_HUMAN	R.GETGPAGRP(+15.99)GEVGP(+15.99)P(+15.99)GP(+15.99)P(+15.99)GPAGEK.G	Y	66.17	2247.0403	24	-0.1	750.0206	3	15.62	1.343E7	1.6019E7	1.4967E7	4.1901E6	4.6381E6	1.6846E7	1.6119E7	1.507E7	7.8887E6	7.5964E6	5.8301E6	7.0756E6	6.3485E6								6.112E6	8.3135E6				4.9048E6	6.1072E6				11	F11:4168	4312_03.raw	17	1	1	1	1
1	2	P02452|CO1A1_HUMAN	K.TGP(+15.99)P(+15.99)GPAGQDGRP(+15.99)GP(+15.99)P(+15.99)GPP(+15.99)GAR.G	Y	65.72	2087.9619	22	1.6	696.9957	3	14.17	3.8542E7	3.6923E7	3.4608E7	2.3663E7	1.097E7	3.7577E7	4.6663E7	3.5876E7	3.6688E7	3.0756E7	3.9189E7	1.6466E7	1.154E7	1.2399E7	1.001E7	9.3854E6	1.0143E7	7.5982E6	8.7505E6	8.2035E6	1.5166E7	2.7874E7	6.2057E6	6.5107E6	5.6558E6	1.4784E7	1.2875E7	1.1094E7	3.9853E6		24	F24:3550	6313_02.raw	29	1	1	1	1
1	2	P02452|CO1A1_HUMAN	R.GP(+15.99)P(+15.99)GP(+15.99)MGPP(+15.99)GLAGPP(+15.99)GESGR.E	Y	65.67	1863.8419	20	2.3	932.9304	2	25.65	2.1467E7	1.8002E7	2.9636E7	1.1861E7	1.2898E7	3.7792E7	3.9919E7	3.5778E7	2.1008E7	2.3272E7	2.0796E7	1.036E7	6.4432E6	5.9642E6	5.3439E6	5.8014E6	5.6646E6	4.2965E6	4.4723E6	4.2271E6	1.5966E7	1.9881E7		2.0385E6	2.7846E6	8.2836E6	7.9943E6	6.2773E6			12	F12:7876	4371_01.raw	40	2	1	2	2
1	2	P02452|CO1A1_HUMAN	R.TGDAGPVGPP(+15.99)GPP(+15.99)GPP(+15.99)GPP(+15.99)GPPSAGFDF.S	Y	65.65	2559.1553	28	2.7	1280.5884	2	51.40	1.112E8	1.0105E8	1.0709E8	3.8025E7	3.9643E7	1.0344E7	2.5884E7	2.5139E7	3.4264E7	3.505E7	3.248E7										9.5173E7	1.2264E8				4.0506E7	4.6508E7	4.4141E7			2	F2:17245	3399_02.raw	33	2	3	2	2
1	2	P02452|CO1A1_HUMAN	K.P(+15.99)GEQGVPGDLGAP(+15.99)GPSGAR.G	Y	65.47	1749.8281	19	0.9	875.9221	2	27.24	4.4249E7	4.1611E7	4.5076E7	5.5842E7	4.8141E7	2.5059E7	2.5879E7	2.4949E7	5.5928E7	5.639E7	5.4012E7		3.9215E6	3.237E6	0			6.8875E6	7.4128E6	5.9628E6	1.3348E7	1.7585E7				2.2531E7	2.0749E7	1.9408E7			7	F7:8614	3849_02.raw	22	1	1	1	2
1	2	P02452|CO1A1_HUMAN	E.P(+15.99)GPVGVQGPP(+15.99)GPAGEEGK.R	Y	65.44	1660.8055	18	3.7	831.4131	2	23.52	1.6923E6	1.3101E6			2.1881E6																					1.8571E6					2	F2:7352	3399_02.raw	4	1	1	0	0
1	2	P02452|CO1A1_HUMAN	P.AGAAGPAGNP(+15.99)GADGQP(+15.99)GAK.G	Y	65.40	1594.7334	19	3.0	798.3763	2	13.72						6.9434E5	9.9299E5	6.2565E5																							7	F7:3345	3849_02.raw	3	0	0	0	0
1	2	P02452|CO1A1_HUMAN	R.GVPGPP(+15.99)GAVGPAGK.D	Y	65.37	1175.6298	14	-2.4	588.8207	2	21.85	4.2115E8	4.2041E8	4.2094E8	2.2841E8	2.5894E8	3.024E8	2.9888E8	2.7824E8	2.8767E8	2.6421E8	2.6936E8	3.3064E7	3.9144E7	3.0668E7	2.2344E7	2.2704E7	1.7863E7	4.4069E7	5.2433E7	3.8271E7	2.5985E8	3.6343E8	3.6049E7	4.9046E7	3.4366E7	2.2865E8	2.2439E8	2.2124E8	6.5882E6	8.6883E6	7	F7:6700	3849_02.raw	30	1	1	1	1
1	2	P02452|CO1A1_HUMAN	R.GAP(+15.99)GDRGEP(+15.99)GPPGP(+15.99)AGFAGPP(+15.99)GADGQPGAK.G	Y	65.34	2702.2319	30	1.2	676.5660	4	25.60		2.1776E7																			1.8324E7										2	F2:8169	3399_02.raw	2	0	1	0	0
1	2	P02452|CO1A1_HUMAN	P.AGPP(+15.99)GAP(+15.99)GAP(+15.99)GAP(+15.99)GPVGPAGK.S	Y	65.34	1742.8586	21	4.7	872.4407	2	18.88				4.9705E6	5.2579E6	2.7374E7	2.9374E7	2.6966E7																		6.8634E6	7.5215E6	7.0553E6	6.8537E6	5.5187E6	29	F29:5302	6474_01.raw	10	0	0	0	1
1	2	P02452|CO1A1_HUMAN	E.TGPAGPP(+15.99)GAP(+15.99)GAP(+15.99)GAP(+15.99)GPVGPAGK.S	Y	65.32	1997.9805	24	2.9	1000.0004	2	21.26	3.2874E6	1.0021E7	1.0896E7	9.5517E6	1.1343E7	1.0214E7	1.1765E7	1.0557E7	9.9313E6	1.0989E7	1.318E7											1.1666E6				2.7069E6	2.7737E6				10	F10:6426	4312_02.raw	24	1	2	2	2
1	2	P02452|CO1A1_HUMAN	R.GETGPAGRP(+15.99)GEVGPP(+15.99)GP(+15.99)P(+15.99)GPAGEKGSP(+15.99)GADGPAGAP(+15.99)GTP(+15.99)GPQGIAGQR.G	Y	65.16	4333.0229	48	-2.5	1084.2603	4	25.27																												1.5149E6			28	F28:7904	6401_03.raw	1	0	0	0	0
1	2	P02452|CO1A1_HUMAN	K.GDRGETGPAGP(+15.99)PGAP(+15.99)GAPGAPGPVGPAGK.S	Y	65.13	2480.2043	29	-0.4	827.7417	3	25.09													6.5368E6																		13	F13:7571	4371_02.raw	1	0	0	0	0
1	2	P02452|CO1A1_HUMAN	K.GDAGPP(+15.99)GPAGPAGPPGP(+15.99)IGNVGAP(+15.99)GAK.G	Y	65.11	2280.1133	27	3.0	1141.0674	2	32.28	3.0714E7	2.0613E7	1.6434E7		8.0981E6	9.2609E6	6.4629E6	6.6695E6	1.4829E7	1.4684E7	1.7945E7										1.319E7	1.977E7				8.8139E6	1.1503E7	1.3664E7			1	F1:10614	3399_01.raw	16	2	1	1	0
1	2	P02452|CO1A1_HUMAN	R.GEP(+15.99)GP(+15.99)PGPAGAAGP(+15.99)AGNP(+15.99)GADGQP(+15.99)GAK.G	Y	65.09	2331.0361	27	0.5	1166.5259	2	15.97																											6.3148E6	5.7573E6			28	F28:4334	6401_03.raw	2	0	0	0	0
1	2	P02452|CO1A1_HUMAN	R.GETGPAGRP(+15.99)GEVGPP(+15.99)GPP(+15.99)GP.A	Y	65.06	1829.8542	20	1.3	915.9355	2	21.78				7.5615E6	7.1602E6	3.3952E7	3.4822E7	3.2688E7										1.4507E6	1.8051E6		2.2846E6	3.3558E6				1.3524E7	1.3628E7	1.1647E7	4.4956E6	4.329E6	26	F26:6483	6401_01.raw	14	0	0	0	1
1	2	P02452|CO1A1_HUMAN	R.GNDGATGAAGPP(+15.99)GPTGPAGP(+15.99)P(+15.99)GFP(+15.99)GAVGAK.G	Y	64.89	2563.1938	30	1.7	1282.6063	2	33.67	4.0618E8	3.9753E8	4.2825E8	1.9589E8	1.825E8	1.6002E8	1.3798E8	1.2826E8	1.5872E8	1.6809E8	1.7772E8	2.4546E7	3.1551E7	1.7479E7	1.8676E7	2.5114E7	2.1831E7	2.6571E7	2.6729E7	2.5956E7	2.1187E8	3.0992E8	3.5866E7	3.5364E7	3.5777E7	1.3701E8	1.4882E8	1.5131E8			7	F7:10922	3849_02.raw	59	2	2	2	2
1	2	P02452|CO1A1_HUMAN	R.GPSGPQGPGGPP(+15.99)GP(+15.99)K.G	Y	64.58	1317.6312	15	0.3	659.8231	2	14.27	4.2841E8	3.8074E8	4.1824E8	2.1101E8	1.8713E8	2.2E8	2.1799E8	8.9234E7	2.3171E8	2.4077E8	2.6863E8	1.1412E7	1.1755E7	6.2176E7		6.4177E6		5.4776E7	6.3858E7	5.2809E7	6.0042E7	2.8834E8				1.7474E8	1.8543E8	1.9285E8			11	F11:4113	4312_03.raw	43	2	3	3	2
1	2	P02452|CO1A1_HUMAN	R.GVPGPPGAVGPAGK.D	Y	64.51	1159.6349	14	-3.6	580.8226	2	25.42	7.1937E7	7.0081E7	8.1306E7	4.5648E7	5.0338E7	4.5289E7	4.1959E7	4.1935E7	5.4066E7	5.6545E7	5.4074E7	3.4121E6	3.2121E6	2.4842E6			1.3883E6	6.7545E6	7.4477E6	6.8716E6	5.0665E7	7.0212E7	4.3179E6	4.2601E6	3.9506E6	3.9402E7	3.8918E7	3.7097E7			7	F7:7940	3849_02.raw	26	1	1	1	1
1	2	P02452|CO1A1_HUMAN	R.GNDGATGAAGP(+15.99)P(+15.99)GPTGPAGPP(+15.99)GFP(+15.99)GAVGAK.G	Y	63.96	2563.1938	30	0.2	1282.6045	2	33.03						1.2274E8	9.3168E7	0				8.2413E6				5.5804E6															6	F6:10780	3849_01.raw	5	0	0	0	0
1	2	P02452|CO1A1_HUMAN	K.GDAGP(+15.99)PGPAGP(+15.99)AGPP(+15.99)GPIGNVGAP(+15.99)GAK.G	Y	63.86	2296.1082	27	2.2	1149.0638	2	28.67																			0					8.3317E6							19	F19:9053	4484_02.raw	1	0	0	0	0
1	2	P02452|CO1A1_HUMAN	R.GSEGPQGVRGEP(+15.99)GP(+15.99)PGPAGAAGPAGNP(+15.99)GADGQP(+15.99)GAK.G	Y	63.75	3182.4612	36	2.3	1061.8301	3	21.24								6.6372E6		2.5604E6																					8	F8:6262	3849_03.raw	2	0	0	0	0
1	2	P02452|CO1A1_HUMAN	K.TGP(+15.99)P(+15.99)GPAGQDGRP(+15.99)GPP(+15.99)GPP(+15.99)GAR.G	Y	63.74	2071.9670	22	-1.2	691.6621	3	15.60	1.3444E8	1.2458E8	1.4523E8	9.8615E7	9.3052E7	1.607E8	1.7513E8	1.6643E8	1.3354E8	1.3969E8	1.5175E8	5.7468E7	4.8299E7	5.4992E7	4.3906E7	3.6604E7	3.6663E7	5.1427E7	4.9476E7	4.8327E7	9.7132E7	1.3535E8	3.744E7	3.4592E7	3.4851E7	8.9547E7	9.5061E7	8.1936E7	1.5257E7	1.3502E7	7	F7:4117	3849_02.raw	30	1	1	1	1
1	2	P02452|CO1A1_HUMAN	K.GDAGP(+15.99)PGPAGPAGP(+15.99)P(+15.99)GPIGNVGAP(+15.99)GAK.G	Y	63.53	2296.1082	27	1.9	766.3781	3	28.21		2.6395E8																													2	F2:9187	3399_02.raw	1	0	1	0	0
1	2	P02452|CO1A1_HUMAN	R.GPSGPQGP(+15.99)GGPP(+15.99)GPK.G	Y	63.53	1317.6312	15	-1.1	659.8221	2	14.75	2.9904E8	2.4415E8	2.9046E8	1.3632E8	1.2963E8	1.7522E8	1.7386E8	1.3854E8	1.68E8	1.6915E8	1.9709E8	5.2061E7	4.4913E7	5.2951E7	4.2671E7	3.5927E7	3.1374E7	4.5081E7	5.3672E7	5.2809E7	1.1856E8	2.0858E8	3.9855E7	3.885E7	3.9815E7	1.2339E8	1.4179E8	1.4441E8		2.2397E6	7	F7:3737	3849_02.raw	39	2	1	1	2
1	2	P02452|CO1A1_HUMAN	K.GESGPSGPAGPTGAR.G	Y	62.87	1296.6058	15	1.5	649.3112	2	15.99	1.7168E9	1.676E9	1.7585E9	1.1665E9	1.0709E9	1.3037E9	1.3163E9	1.212E9	1.0277E9	1.1593E9	1.2641E9	2.8056E8	2.7793E8	2.5995E8	1.8967E8	1.904E8	1.846E8	2.8881E8	2.6314E8	2.7057E8	9.6669E8	1.3383E9	1.6105E8	1.5532E8	1.5208E8	8.8744E8	8.8954E8	9.3413E8	4.5162E7	3.9511E7	17	F17:4191	4406_03.raw	38	1	1	2	1
1	2	P02452|CO1A1_HUMAN	R.GETGPAGRP(+15.99)GEVGPP(+15.99)GP(+15.99)PGP(+15.99)AGEK.G	Y	62.71	2231.0454	24	1.9	744.6905	3	17.94											1.67E8																				11	F11:5061	4312_03.raw	1	0	0	0	0
1	2	P02452|CO1A1_HUMAN	R.GLTGPIGP(+15.99)P(+15.99)GPAGAP(+15.99)GDK.G	Y	62.66	1605.7997	18	2.0	803.9088	2	28.03	1.3599E8	1.2442E8	1.4177E8	1.1749E8	1.197E8	1.8364E8	1.5967E8	1.7047E8	1.6182E8	1.7339E8	1.6187E8	5.0484E7	4.9727E7	4.8592E7	4.9437E7	4.6948E7	4.6364E7	3.5516E7	3.2767E7	3.6332E7	1.2149E8	1.5475E8	2.1416E7	2.1258E7	2.155E7	7.063E7	7.4995E7	7.0846E7	1.5865E7	1.599E7	16	F16:8952	4406_02.raw	30	1	1	1	1
1	2	P02452|CO1A1_HUMAN	R.GAP(+15.99)GDRGEP(+15.99)GP(+15.99)PGPAGFAGPP(+15.99)GADGQPGAK.G	Y	62.28	2702.2319	30	1.5	901.7526	3	26.94					1.3064E7	1.3096E8	0								0			3.4276E7										1.1247E7		5.3673E6	6	F6:8436	3849_01.raw	5	0	0	0	0
1	2	P02452|CO1A1_HUMAN	R.GSAGP(+15.99)P(+15.99)GATGFP(+15.99)GAAGR.V	Y	62.24	1474.6799	17	1.6	738.3484	2	20.08	3.4938E7	3.9393E7	3.9967E7	2.0606E7	1.8792E7	5.1283E7	5.1323E7	4.7823E7	3.1248E7	2.9166E7	3.2813E7	1.2924E7	1.4337E7	1.2899E7	9.8724E6	9.4887E6	8.9786E6	8.0847E6	8.0262E6	7.9557E6	2.416E7	3.2104E7	7.5418E6	7.2168E6	7.4296E6	1.8267E7	1.8317E7	1.6664E7	3.8779E6	3.8756E6	11	F11:6001	4312_03.raw	30	1	1	1	1
1	2	P02452|CO1A1_HUMAN	R.GPP(+15.99)GP(+15.99)MGP(+15.99)PGLAGPP(+15.99)GESGR.E	Y	62.00	1847.8470	20	2.2	616.9576	3	26.46	3.0299E8		3.3027E8		2.1612E8	2.1478E8	1.6684E8	1.7912E8		1.6877E8	1.6669E8										2.2701E8	3.1264E8				1.5405E8		1.6658E8			7	F7:8400	3849_02.raw	12	1	0	1	0
1	2	P02452|CO1A1_HUMAN	K.DGEAGAQGPP(+15.99)GPAGPAGERGEQGPAGSP(+15.99)GFQGLP(+15.99)GP(+15.99)AGP(+15.99)PGEAGKP(+15.99)GEQGVP(+15.99)GDLGAP(+15.99)GPSGAR.G	Y	61.96	5815.6602	64	-1.6	1164.1375	5	34.15																					1.1911E7										21	F21:10984	5289_01.raw	1	0	0	0	0
1	2	P02452|CO1A1_HUMAN	R.GEPGP(+15.99)P(+15.99)GPAGAAGPAGNP(+15.99)GADGQPGAK.G	Y	61.95	2299.0464	27	0.2	767.3562	3	18.91	5.9466E7					4.5272E7															3.7514E7										1	F1:5613	3399_01.raw	3	1	0	0	0
1	2	P02452|CO1A1_HUMAN	R.VGP(+15.99)PGPSGNAGPP(+15.99)GPP(+15.99)GPAGK.E	Y	61.95	1811.8801	21	0.8	604.9678	3	19.61	7.9532E8	6.9459E8	7.4444E8	3.7724E8	4.1982E8	4.2389E8	3.662E8	3.6209E8	3.8145E8	3.8451E8	4.3866E8	7.8675E7	8.7859E7	6.3791E7	0		7.2946E7		7.2251E7	7.765E7	3.7089E8	5.2476E8	1.0374E8		1.0075E8	3.6024E8	3.3792E8	3.4504E8	6.2108E6		9	F9:5658	4312_01.raw	26	1	1	1	1
1	2	P02452|CO1A1_HUMAN	R.GVP(+15.99)GPP(+15.99)GAVGPAGK.D	Y	61.88	1191.6248	14	1.8	596.8207	2	18.67	2.9337E9	2.8512E9	2.965E9	1.7515E9	1.8434E9	2.4555E9	2.2235E9	2.174E9	1.6234E9	1.702E9	1.768E9	4.4961E8	4.2626E8	3.7452E8	3.6308E8	3.4204E8	3.5972E8	4.2935E8	4.54E8	4.3778E8	1.7609E9	2.6318E9	4.2605E8	3.9101E8	3.8278E8	1.5291E9	1.5776E9	1.5528E9	1.2814E8	1.194E8	24	F24:5249	6313_02.raw	42	1	3	2	2
1	2	P02452|CO1A1_HUMAN	R.GPSGPQGP(+15.99)GGP(+15.99)PGP(+15.99)KGNSGEP(+15.99)GAP(+15.99)GSK.G	Y	61.84	2404.0889	27	-0.7	802.3697	3	13.86	3.2223E6	2.0558E6																													1	F1:3520	3399_01.raw	2	1	1	0	0
1	2	P02452|CO1A1_HUMAN	K.TGPP(+15.99)GPAGQDGRP(+15.99)GPP(+15.99)GP(+15.99)PGAR.G	Y	61.81	2055.9722	22	0.4	686.3316	3	16.59	5.7432E7									2.5161E7	0	2.1546E8		2.074E8		0	1.4142E8		2.861E8			0					9.511E8				12	F12:4526	4371_01.raw	7	1	0	0	0
1	2	P02452|CO1A1_HUMAN	K.DGEAGAQGPPGP(+15.99)AGPAGERGEQGP(+15.99)AGSP(+15.99)GFQGLP(+15.99)GPAGPP(+15.99)GEAGKP(+15.99)GEQGVP(+15.99)GDLGAP(+15.99)GPSGAR.G	Y	61.57	5815.6602	64	5.9	1164.1461	5	36.08		0																													2	F2:11997	3399_02.raw	0	0	0	0	0
1	2	P02452|CO1A1_HUMAN	R.GPSGPQGPGGP(+15.99)P(+15.99)GPK.G	Y	61.47	1317.6312	15	-1.1	659.8221	2	14.75	2.9466E8	2.4415E8	2.957E8	1.3451E8	1.2481E8	1.7522E8	1.7386E8	1.3854E8	1.68E8	1.6732E8	1.9482E8	5.2061E7	4.4913E7	5.2951E7	4.9514E7	4.2344E7	3.1374E7	4.5081E7	5.3672E7	5.2809E7	1.1722E8	2.0858E8	3.9855E7	3.885E7	3.8828E7	1.2339E8	1.3988E8	1.9285E8	2.6606E6	2.2397E6	7	F7:3824	3849_02.raw	35	1	1	2	1
1	2	P02452|CO1A1_HUMAN	R.GPSGPQGP(+15.99)GGPP(+15.99)GP(+15.99)K.G	Y	61.28	1333.6261	15	0.5	667.8207	2	14.53	2.6217E7	2.4086E7	2.7928E7	1.4203E7	1.452E7		3.0926E7	3.8274E7	1.4915E7	1.7007E7	1.8209E7	7.4133E6	5.5035E6	1.3081E7							1.3114E7	1.8613E7	2.5773E6		2.548E6	1.2014E7	1.3816E7	1.0954E7			7	F7:3640	3849_02.raw	22	1	1	1	1
1	2	P02452|CO1A1_HUMAN	K.GDAGPP(+15.99)GPAGPAGP(+15.99)PGP(+15.99)IGNVGAP(+15.99)GAK.G	Y	61.21	2296.1082	27	0.9	766.3774	3	31.42				1.1679E8	1.1059E8			8.0967E7	1.3348E8					0								2.0906E8	2.4467E7			1.081E8		1.0894E8			14	F14:9807	4371_03.raw	8	0	0	0	1
1	2	P02452|CO1A1_HUMAN	R.GEP(+15.99)GPTGLP(+15.99)GPP(+15.99)GER.G	Y	61.06	1464.6843	15	1.2	733.3503	2	21.91	2.4346E9	2.3583E9	2.6734E9	1.668E9	1.6655E9	2.3567E9	2.1498E9	2.0719E9	1.6771E9	1.7284E9	1.7535E9	3.4585E8	3.7422E8	3.1593E8	3.4508E8	3.051E8	2.7716E8	4.3113E8	4.115E8	3.9782E8	1.8194E9	2.5728E9	3.0099E8	2.6914E8	2.6391E8	1.5383E9	1.5466E9	1.4196E9	1.1686E8	1.2369E8	2	F2:6439	3399_02.raw	47	2	2	2	2
1	2	P02452|CO1A1_HUMAN	K.NGDDGEAGKP(+15.99)GRP(+15.99)GERGPP(+15.99)GPQGAR.G	Y	60.94	2476.1438	25	1.0	496.2365	5	13.16	1.7485E7	3.0709E7	3.5818E7			1.783E7															2.3967E6	6.4665E6	4.3641E6	4.3139E6		9.2811E6	6.0678E6	5.8402E6			26	F26:3262	6401_01.raw	15	1	2	2	0
1	2	P02452|CO1A1_HUMAN	R.GPP(+15.99)GP(+15.99)MGPPGLAGP(+15.99)PGESGR.E	Y	60.87	1831.8522	20	1.7	916.9349	2	27.02				1.0756E8			8.9367E7																			9.8098E7	8.9781E7	8.6761E7			27	F27:8690	6401_02.raw	5	0	0	0	1
1	2	P02452|CO1A1_HUMAN	K.DGEAGAQGP(+15.99)PGPAGPAGERGEQGPAGSP(+15.99)GFQGLP(+15.99)GPAGPP(+15.99)GEAGKP(+15.99)GEQGVPGDLGAP(+15.99)GPSGAR.G	Y	60.68	5783.6704	64	-0.5	1157.7407	5	37.81			0																		2.5427E7	3.0096E7									22	F22:12566	5289_03_r.raw	2	0	0	0	0
1	2	P02452|CO1A1_HUMAN	K.DGEAGAQGPP(+15.99)GPAGPAGERGEQGPAGSP(+15.99)GFQGLP(+15.99)GPAGPP(+15.99)GEAGKP(+15.99)GEQGVPGDLGAP(+15.99)GPSGAR.G	Y	60.68	5783.6704	64	3.8	1157.7457	5	37.82																					2.5427E7										21	F21:12361	5289_01.raw	1	0	0	0	0
1	2	P02452|CO1A1_HUMAN	R.GFSGLQGP(+15.99)PGPPGSP(+15.99)GEQGPSGASGPAGPR.G	Y	60.68	2688.2527	30	1.4	897.0928	3	35.50												4.8102E6																			12	F12:11491	4371_01.raw	1	0	0	0	0
1	2	P02452|CO1A1_HUMAN	K.DGEAGAQGP(+15.99)PGPAGPAGERGEQGPAGSP(+15.99)GFQGLP(+15.99)GPAGP(+15.99)PGEAGKP(+15.99)GEQGVP(+15.99)GDLGAP(+15.99)GPSGAR.G	Y	60.60	5799.6655	64	0.3	1450.9241	4	35.95	8.0737E7			2.7867E7																		4.6845E7									22	F22:12085	5289_03_r.raw	3	1	0	0	1
1	2	P02452|CO1A1_HUMAN	F.SGLQGPP(+15.99)GP(+15.99)PGSP(+15.99)GEQGPSGASGPAGPR.G	Y	60.43	2500.1577	28	-0.4	834.3928	3	25.97							6.5573E6																								7	F7:8142	3849_02.raw	1	0	0	0	0
1	2	P02452|CO1A1_HUMAN	R.GEP(+15.99)GPP(+15.99)GP(+15.99)AGAAGPAGNP(+15.99)GADGQP(+15.99)GAK.G	Y	60.35	2331.0361	27	0.0	1166.5254	2	16.42								4.8246E7		9.1199E6		1.2301E7		8.5061E6			7.762E6					9.1267E6			9.2596E6						10	F10:4510	4312_02.raw	7	0	0	0	0
1	2	P02452|CO1A1_HUMAN	F.SGLQGPP(+15.99)GPP(+15.99)GSP(+15.99)GEQGPSGASGPAGPR.G	Y	60.31	2500.1577	28	3.5	834.3961	3	25.97						7.3573E6		5.7331E6																							8	F8:8080	3849_03.raw	2	0	0	0	0
1	2	P02452|CO1A1_HUMAN	R.GEQGPAGSP(+15.99)GFQGLPGP(+15.99)AGPP(+15.99)GEAGKP(+15.99)GEQGVP(+15.99)GDLGAP(+15.99)GPSGAR.G	Y	60.27	4111.9106	45	-1.6	823.3881	5	37.15							1.3748E7	1.2435E7													6.0965E8	2.7218E7	2.0013E7					7.8406E6			7	F7:12172	3849_02.raw	6	0	0	0	0
1	2	P02452|CO1A1_HUMAN	R.GFP(+15.99)GLP(+15.99)GPSGEPGK.Q	N	60.24	1327.6407	14	1.5	664.8287	2	34.30	1.0558E9	9.6048E8	1.0422E9	7.0994E8	6.6653E8	4.6752E8	4.692E8	5.4391E8	6.5986E8	6.7283E8	7.13E8	6.4568E7	5.5261E7	5.5074E7	5.1569E7	5.048E7	4.4867E7	9.3001E7	9.5603E7	9.8012E7	6.6353E8	9.2096E8	6.8114E7	6.197E7	7.2137E7	5.4301E8	4.8834E8	4.4404E8	1.4995E7	1.5607E7	7	F7:11234	3849_02.raw	37	2	2	2	1
1	2	P02452|CO1A1_HUMAN	P.AGPAGPP(+15.99)GPIGNVGAP(+15.99)GAK.G	Y	60.20	1615.8317	19	0.6	808.9236	2	27.42				1.6053E7	1.5253E7	4.9169E7	5.0215E7	4.6066E7										3.2574E6	3.5639E6	3.9716E6						1.3548E7	1.4245E7	1.5229E7	5.3517E6	5.3931E6	7	F7:8673	3849_02.raw	17	0	0	0	1
1	2	P02452|CO1A1_HUMAN	R.GPSGPQGP(+15.99)GGP(+15.99)P(+15.99)GPK.G	Y	60.16	1333.6261	15	0.5	667.8207	2	14.53	2.6217E7			1.4203E7	1.452E7	2.7468E7	3.0926E7	2.1151E7	1.4915E7	1.7007E7	1.8209E7	3.3755E6	3.6062E6	8.5146E6	5.207E6	3.4824E6	4.4294E6	4.3342E6		5.3479E6		1.8613E7	2.5773E6			1.2014E7	1.3816E7				7	F7:3372	3849_02.raw	21	1	0	0	1
1	2	P02452|CO1A1_HUMAN	R.GPSGPQGP(+15.99)GGP(+15.99)P(+15.99)GP(+15.99)K.G	Y	60.12	1349.6211	15	1.3	675.8187	2	13.72						1.0149E6	1.3134E6	8.5205E5																							7	F7:3347	3849_02.raw	3	0	0	0	0
1	2	P02452|CO1A1_HUMAN	K.TGP(+15.99)P(+15.99)GPAGQDGRP(+15.99)GPP(+15.99)GP(+15.99)P(+15.99)GAR.G	Y	60.10	2087.9619	22	0.7	696.9951	3	14.71	3.8542E7		3.4608E7		1.097E7	3.7577E7	4.6663E7	3.5876E7	3.6688E7	3.0756E7	3.9189E7	1.6466E7	1.154E7	1.2399E7	1.001E7				8.7505E6	8.2035E6	1.5166E7	2.7874E7	6.2057E6	6.5107E6		1.4784E7	1.2875E7	1.1094E7			12	F12:3616	4371_01.raw	22	1	0	1	0
1	2	P02452|CO1A1_HUMAN	R.VGP(+15.99)P(+15.99)GPSGNAGPPGP(+15.99)P(+15.99)GPAGK.E	Y	59.83	1827.8750	21	1.1	914.9458	2	17.93													2.7493E7	2.7194E7												6.7172E7					26	F26:4829	6401_01.raw	3	0	0	0	0
1	2	P02452|CO1A1_HUMAN	K.TGP(+15.99)PGPAGQDGRP(+15.99)GP(+15.99)P(+15.99)GPP(+15.99)GAR.G	Y	59.79	2071.9670	22	1.8	691.6642	3	14.98		1.2458E8	1.4523E8							1.3969E8	1.5175E8			5.4992E7												8.9547E7			1.5257E7		11	F11:3817	4312_03.raw	7	0	1	1	0
1	2	P02452|CO1A1_HUMAN	K.GDRGETGPAGP(+15.99)PGAPGAP(+15.99)GAPGPVGPAGK.S	Y	59.74	2480.2043	29	1.0	827.7429	3	25.05			9.9569E7									6.8949E6			3.0367E6	2.9635E6															15	F15:7957	4406_01.raw	4	0	0	1	0
1	2	P02452|CO1A1_HUMAN	R.GEQGPAGSP(+15.99)GFQGLP(+15.99)GP(+15.99)AGPP(+15.99)GEAGKP(+15.99)GEQGVPGDLGAP(+15.99)GPSGAR.G	Y	59.70	4111.9106	45	-0.4	1028.9845	4	35.69					0					0											6.0965E8	0									21	F21:12258	5289_01.raw	1	0	0	0	0
1	2	P02452|CO1A1_HUMAN	R.GPPGP(+15.99)MGPPGLAGPP(+15.99)GESGR.E	Y	59.66	1815.8573	20	1.9	908.9376	2	28.33	5.7707E6	7.097E6	6.6478E6				5.3413E6			4.4658E6											1.2432E7					2.9888E6					2	F2:9142	3399_02.raw	7	1	1	1	0
1	2	P02452|CO1A1_HUMAN	R.GFSGLQGP(+15.99)PGP(+15.99)PGSP(+15.99)GEQGPSGASGPAGPR.G	Y	59.55	2704.2476	30	2.2	902.4251	3	33.01																		5.214E7	6.8122E7		4.3764E8		5.1994E7	4.93E7							18	F18:10791	4484_01.raw	6	0	0	0	0
1	2	P02452|CO1A1_HUMAN	K.TGPP(+15.99)GPAGQDGRP(+15.99)GP(+15.99)P(+15.99)GPP(+15.99)GAR.G	Y	59.54	2071.9670	22	-1.2	691.6621	3	15.60	1.3444E8				9.3052E7	1.607E8	1.7513E8	1.6643E8	1.3354E8			5.7468E7	4.8299E7		4.3906E7		3.6663E7	5.1427E7			9.7132E7	1.3535E8	3.744E7				9.5061E7	8.1936E7			7	F7:3947	3849_02.raw	16	1	0	0	0
1	2	P02452|CO1A1_HUMAN	R.GETGPAGRP(+15.99)GEVGPP(+15.99)GP(+15.99)P(+15.99)GP(+15.99)AGEK.G	Y	59.51	2247.0403	24	0.9	750.0214	3	16.90	3.5036E7	3.1575E7	3.9978E7	3.0855E7	3.0181E7	5.7291E7	5.2839E7	5.104E7	4.0007E7	3.8657E7	4.3839E7	1.5781E7	1.5998E7	1.6478E7	1.499E7		1.4311E7	1.4393E7	1.5508E7	1.4757E7	2.9232E7	3.9928E7	1.1388E7	1.1404E7	9.9026E6	2.6206E7	2.8254E7	2.5168E7			18	F18:4585	4484_01.raw	27	1	1	1	1
1	2	P02452|CO1A1_HUMAN	R.GFSGLQGP(+15.99)PGP(+15.99)PGSPGEQGPSGASGPAGPR.G	Y	59.38	2688.2527	30	1.6	897.0930	3	35.52	1.2805E8					6.8574E7												5.9553E6													6	F6:11854	3849_01.raw	3	1	0	0	0
1	2	P02452|CO1A1_HUMAN	K.GEP(+15.99)GPVGVQGPPGPAGEEGK.R	Y	59.38	1830.8748	20	1.9	916.4464	2	25.56									1.6365E7	1.652E7											9.1608E6					4.4095E6		3.6982E6			28	F28:7987	6401_03.raw	5	0	0	0	0
1	2	P02452|CO1A1_HUMAN	K.GLTGSP(+15.99)GSPGPDGK.T	Y	59.30	1241.5887	14	-1.6	621.8007	2	16.75	7.6288E7	6.9232E7	7.4211E7	4.6413E7	4.5171E7	5.0333E7	4.8235E7	4.4098E7	5.6551E7	5.9049E7	6.0436E7	1.1651E7	1.0622E7	9.5688E6				1.2873E7	1.4086E7	1.4509E7	3.9849E7	5.7372E7	7.8469E6	6.9714E6	6.6421E6	3.8287E7	4.0725E7	3.5024E7			7	F7:4498	3849_02.raw	25	1	1	1	1
1	2	P02452|CO1A1_HUMAN	R.GLP(+15.99)GPP(+15.99)GAP(+15.99)GPQGFQGPPGEP(+15.99)GEP(+15.99)GASGP(+15.99)MGPR.G	Y	59.24	3099.3989	33	0.6	1034.1409	3	33.73	6.776E7	7.6995E7	6.2389E7	4.4222E7	3.945E7	2.5718E7	2.3115E7	2.8676E7	4.4847E7	4.6066E7	4.4165E7							6.7892E6		5.7423E6	5.0223E7	6.0754E7				2.5103E7	2.0244E7	2.537E7			1	F1:11124	3399_01.raw	19	1	2	1	1
1	2	P02452|CO1A1_HUMAN	K.GSP(+15.99)GEAGRP(+15.99)GEAGLP(+15.99)GAK.G	Y	59.15	1654.7909	18	-0.6	828.4022	2	15.71	1.6084E9	1.4744E9	1.5756E9	9.3559E8	8.6772E8	1.3903E9	1.345E9	1.2958E9	9.4281E8	9.5733E8	1.04E9	2.6099E8	2.0986E8	2.1062E8	2.1298E8	1.9671E8	1.8976E8	2.5395E8	2.5358E8	2.5622E8	8.3102E8	1.2358E9	1.8034E8	1.7059E8	1.754E8	8.766E8	8.9558E8	8.8065E8	6.5355E7	5.8951E7	7	F7:4223	3849_02.raw	60	2	2	2	2
1	2	P02452|CO1A1_HUMAN	R.GSEGPQGVRGEP(+15.99)GPP(+15.99)GPAGAAGPAGNP(+15.99)GADGQPGAK.G	Y	58.81	3166.4663	36	-3.7	1056.4922	3	20.83	2.0592E6																														1	F1:6290	3399_01.raw	1	1	0	0	0
1	2	P02452|CO1A1_HUMAN	K.GANGAP(+15.99)GIAGAP(+15.99)GFP(+15.99)GAR.G	Y	58.77	1584.7644	18	1.9	793.3910	2	28.60	1.3501E9	1.278E9	1.2591E9	9.6445E8	8.9143E8	9.242E8	9.2968E8	8.9685E8	6.5748E8	7.2615E8	7.0487E8	1.4828E8	1.5149E8	1.3996E8	1.2721E8	1.145E8	1.1062E8	1.6578E8	1.7855E8	1.77E8	7.9492E8	1.0392E9	1.6121E8	1.4774E8	1.5257E8	7.1702E8	6.8865E8	6.7238E8	4.9513E7	4.8372E7	24	F24:8717	6313_02.raw	46	2	2	2	2
1	2	P02452|CO1A1_HUMAN	K.DGEAGAQGPPGP(+15.99)AGPAGERGEQGPAGSP(+15.99)GFQGLP(+15.99)GP(+15.99)AGP(+15.99)PGEAGKP(+15.99)GEQGVP(+15.99)GDLGAP(+15.99)GPSGAR.G	Y	58.75	5815.6602	64	2.6	1164.1423	5	35.57						0																									6	F6:11721	3849_01.raw	0	0	0	0	0
1	2	P02452|CO1A1_HUMAN	K.GESGPSGP(+15.99)AGPTGAR.G	Y	58.74	1312.6007	15	1.6	657.3087	2	13.85	7.8986E6	8.0944E6	8.6483E6	4.7003E6	4.4903E6	1.1771E7	1.0931E7	9.4925E6	4.9092E6	5.0605E6	5.1071E6	2.2644E6	2.6778E6	3.0243E6	1.6875E6	1.4498E6	1.3263E6	2.086E6	2.1498E6	2.5689E6	3.1896E7	5.0251E7		1.0579E6	1.0261E6	3.9741E6	5.093E6	4.9537E6			11	F11:3484	4312_03.raw	27	1	1	1	1
1	2	P02452|CO1A1_HUMAN	K.GDRGETGPAGP(+15.99)PGAPGAPGAPGPVGPAGK.S	Y	58.72	2464.2095	29	2.2	822.4122	3	25.78																						7.2827E6									22	F22:8132	5289_03_r.raw	1	0	0	0	0
1	2	P02452|CO1A1_HUMAN	K.GEP(+15.99)GPVGVQGPP(+15.99)GPAGEEGKR.G	Y	58.54	2002.9707	21	-0.4	668.6639	3	21.00	1.5849E7	1.4954E7	1.6032E7	8.1752E6	7.5132E6	7.1972E6	8.4991E6	8.3204E6		3.931E6								1.7339E6	1.6099E6	1.4548E6	1.3209E7	1.9119E7				1.2349E7	1.2115E7	1.1969E7			28	F28:6258	6401_03.raw	17	1	1	1	1
1	2	P02452|CO1A1_HUMAN	R.GQAGVM(+15.99)GFP(+15.99)GPK.G	Y	58.31	1176.5597	12	0.9	589.2877	2	23.68	3.7444E8	3.6463E8	3.9371E8	2.4347E8	2.519E8	3.4843E8	3.2148E8	3.3915E8	2.3637E8	2.35E8	2.5248E8	7.3759E7	7.3442E7	6.3983E7	5.5964E7	5.5542E7	5.3276E7	7.9143E7	7.8387E7	7.9603E7	2.3413E8	3.2776E8	4.9542E7	4.4507E7	4.3033E7	2.2278E8	2.0844E8	1.9939E8	1.7071E7	1.6305E7	25	F25:7104	6313_03.raw	30	1	1	1	1
1	2	P02452|CO1A1_HUMAN	K.GSPGADGP(+15.99)AGAP(+15.99)GTPGPQGIAGQR.G	Y	58.30	2103.9932	24	1.5	702.3394	3	24.53	3.3522E8	3.3507E8	3.7005E8	2.1083E8	2.2168E8	1.4237E8	9.0129E7	7.7043E7	2.0678E8			3.5003E7	3.1922E7	2.539E7				3.3114E7	3.8232E7		4.6006E8	3.0463E8	4.4554E7	4.4887E7	4.2194E7		2.7387E8			1.2659E7	25	F25:7355	6313_03.raw	24	1	1	1	1
1	2	P02452|CO1A1_HUMAN	K.GEP(+15.99)GSP(+15.99)GENGAP(+15.99)GQMGP(+15.99)R.G	Y	58.29	1757.7274	18	0.5	879.8715	2	13.84	9.8489E7	6.7928E7	1.1397E8	5.2698E7	2.6625E7	9.3284E7	8.6081E7	7.5097E7	4.669E7	5.9254E7	4.7051E7	1.5927E7	1.5021E7	1.4319E7	1.4641E7	1.4975E7	1.035E7	1.8881E7	2.0568E7	1.7511E7	4.3086E7	6.3312E7	7.9186E6	6.9521E6	8.5964E6	3.979E7	5.8855E7	3.4662E7		3.448E6	7	F7:3422	3849_02.raw	44	2	1	2	2
1	2	P02452|CO1A1_HUMAN	R.GFSGLQGPPGPPGSP(+15.99)GEQGPSGASGPAGPR.G	Y	58.28	2672.2578	30	2.1	891.7617	3	36.12																						5.6958E6									22	F22:12053	5289_03_r.raw	1	0	0	0	0
1	2	P02452|CO1A1_HUMAN	R.GP(+15.99)SGPQGPGGP(+15.99)P(+15.99)GPK.G	Y	58.21	1333.6261	15	1.6	667.8214	2	14.58		2.4086E7	2.7928E7		1.452E7	2.7468E7	3.0926E7	3.8274E7	1.4915E7	1.7007E7	1.8209E7	7.4133E6	9.1097E6	8.5146E6	3.4362E6		4.4294E6		4.6164E6	5.3479E6	1.3114E7	1.8613E7						1.0954E7			13	F13:3564	4371_02.raw	21	0	1	1	0
1	2	P02452|CO1A1_HUMAN	P.AGPPGPIGNVGAP(+15.99)GAK.G	Y	58.10	1374.7255	16	0.4	688.3703	2	27.36						8.0037E6	8.0165E6	7.8649E6																							7	F7:8679	3849_02.raw	3	0	0	0	0
1	2	P02452|CO1A1_HUMAN	R.GETGPAGRP(+15.99)GEVGP(+15.99)PGPP(+15.99)GP(+15.99)AGEK.G	Y	58.00	2231.0454	24	1.8	744.6904	3	18.01													2.6463E7										3.0086E7								23	F23:4956	6313_01.raw	2	0	0	0	0
1	2	P02452|CO1A1_HUMAN	K.TGPP(+15.99)GPAGQDGRP(+15.99)GPP(+15.99)GP(+15.99)P(+15.99)GAR.G	Y	57.84	2071.9670	22	0.3	691.6631	3	15.42	1.3444E8	1.2458E8	1.4523E8	9.8615E7	9.3052E7		1.7513E8			1.3969E8	1.5175E8	5.7468E7	4.8299E7					5.1427E7			9.7132E7		3.744E7			8.9547E7		8.1936E7			10	F10:3816	4312_02.raw	15	1	1	1	1
1	2	P02452|CO1A1_HUMAN	R.GFSGLDGAK(+178.05)GDAGPAGPK.G	Y	57.83	1778.8322	18	2.3	890.4254	2	24.58	4.4907E7	4.6732E7	4.9052E7	3.1261E7	3.4221E7	4.2056E7	4.2607E7	3.7177E7	3.7862E7	3.9477E7	3.7596E7	4.5129E6	4.0944E6	3.7777E6	6.2202E6	5.0467E6	4.6977E6	7.0312E6	7.3027E6	6.2539E6	3.4043E7	4.3271E7				2.4485E7	2.6168E7	2.1619E7	2.7216E6		27	F27:7652	6401_02.raw	40	2	2	2	1
1	2	P02452|CO1A1_HUMAN	K.GDAGP(+15.99)PGPAGPAGPPGPIGNVGAP(+15.99)GAK.G	Y	57.81	2264.1184	27	3.5	755.7161	3	32.64												4.923E6	3.6856E6										4.9104E6			0		0			23	F23:10363	6313_01.raw	3	0	0	0	0
1	2	P02452|CO1A1_HUMAN	K.DGLNGLP(+15.99)GPIGP(+15.99)P(+15.99)GPR.G	Y	57.81	1560.7896	16	0.2	781.4022	2	35.80	2.2291E9	1.9991E9	2.0872E9	1.3098E9	1.4597E9	1.3847E9	1.4665E9	1.4037E9	1.4961E9	1.5522E9	1.7083E9	2.1611E8	2.4427E8	2.3093E8	2.1028E8	1.694E8	1.7705E8	2.5786E8	2.8353E8	2.8232E8	1.3184E9	1.8375E9	3.0112E8	2.8613E8	2.8236E8	9.1331E8	8.9608E8	8.3984E8	6.4758E7	6.684E7	24	F24:11446	6313_02.raw	68	2	3	3	2
1	2	P02452|CO1A1_HUMAN	K.TGPP(+15.99)GPAGQDGRPGPP(+15.99)GPP(+15.99)GAR.G	Y	57.79	2039.9772	22	2.5	681.0013	3	16.79	3.7528E7								2.7766E7												1.8661E7					2.4399E7	2.5317E7	2.2038E7			28	F28:4636	6401_03.raw	6	1	0	0	0
1	2	P02452|CO1A1_HUMAN	R.GEP(+15.99)GP(+15.99)P(+15.99)GPAGFAGPP(+15.99)GADGQP(+15.99)GAK.G	Y	57.62	2164.9661	24	0.2	1083.4905	2	25.24									2.6057E6		5.0779E6																				9	F9:7984	4312_01.raw	2	0	0	0	0
1	2	P02452|CO1A1_HUMAN	R.GPSGPQGPGGP(+15.99)PGP(+15.99)KGNSGEP(+15.99)GAP(+15.99)GSK.G	Y	57.53	2388.0940	27	3.2	797.0411	3	14.80																												0			28	F28:3828	6401_03.raw	0	0	0	0	0
1	2	P02452|CO1A1_HUMAN	K.GLTGSP(+15.99)GSP(+15.99)GPDGK.T	Y	57.48	1257.5836	14	-0.2	629.7990	2	15.34	1.0616E9	1.0726E9	1.1971E9	7.156E8	6.9275E8	9.6069E8	9.789E8	8.4081E8	6.5358E8	6.925E8	7.1829E8	1.6862E8	1.4159E8	1.5233E8	1.3698E8	1.2938E8	1.3451E8	1.9082E8	1.8656E8	1.9661E8	5.9005E8	8.894E8	1.1585E8	1.1902E8	1.0928E8	5.8377E8	6.4303E8	6.2673E8	4.4441E7	4.0857E7	7	F7:4010	3849_02.raw	30	1	1	1	1
1	2	P02452|CO1A1_HUMAN	K.GDAGPP(+15.99)GPAGPAGPPGPIGN(+.98)VGAP(+15.99)GAK.G	Y	57.48	2265.1025	27	2.6	1133.5615	2	33.80		0																													2	F2:11149	3399_02.raw	0	0	0	0	0
1	2	P02452|CO1A1_HUMAN	R.VGP(+15.99)P(+15.99)GPSGNAGPP(+15.99)GPPGP(+15.99)AGK.E	Y	57.38	1827.8750	21	0.2	914.9449	2	17.84	1.882E8	1.7056E8	1.9033E8							1.2691E8													2.6772E7	4.8744E7	4.818E7				5.0678E6		23	F23:4777	6313_01.raw	8	1	1	1	0
1	2	P02452|CO1A1_HUMAN	D.GEAGAQGPP(+15.99)GPAGPAGER.G	Y	57.31	1590.7385	18	9.0	796.3837	2	16.57																										1.2404E7	1.3035E7	1.1214E7			28	F28:4511	6401_03.raw	3	0	0	0	0
1	2	P02452|CO1A1_HUMAN	A.AGPP(+15.99)GPTGPAGPP(+15.99)GFP(+15.99)GAVGAK.G	Y	57.30	1903.9426	22	2.0	952.9805	2	33.05						8.3896E6		0																							8	F8:10682	3849_03.raw	2	0	0	0	0
1	2	P02452|CO1A1_HUMAN	R.GETGPAGP(+15.99)PGAP(+15.99)GAP(+15.99)GAPGPVGPAGK.S	Y	57.20	2168.0496	26	1.1	723.6913	3	23.97	1.3535E8																														1	F1:7456	3399_01.raw	1	1	0	0	0
1	2	P02452|CO1A1_HUMAN	K.GEPGPVGVQGP(+15.99)PGPAGEEGK.R	Y	57.19	1830.8748	20	2.6	916.4470	2	25.33		2.1165E7																													2	F2:8158	3399_02.raw	1	0	1	0	0
1	2	P02452|CO1A1_HUMAN	A.GPP(+15.99)GPTGPAGPP(+15.99)GFP(+15.99)GAVGAK.G	Y	56.93	1832.9055	21	-0.3	917.4597	2	33.10	2.4141E8	2.1957E8	2.3755E8	2.8943E8				3.5744E8													1.4896E8	2.069E8					1.4974E8	1.4123E8			2	F2:10699	3399_02.raw	9	1	1	1	1
1	2	P02452|CO1A1_HUMAN	K.DGEAGAQGPPGPAGP(+15.99)AGERGEQGPAGSP(+15.99)GFQGLP(+15.99)GPAGP(+15.99)PGEAGKP(+15.99)GEQGVPGDLGAP(+15.99)GPSGAR.G	Y	56.91	5783.6704	64	2.0	1157.7437	5	39.25								0																		0					8	F8:12876	3849_03.raw	0	0	0	0	0
1	2	P02452|CO1A1_HUMAN	K.DGLNGLP(+15.99)GPIGPP(+15.99)GPR.G	Y	56.84	1544.7946	16	0.9	773.4053	2	37.69	5.6198E7	5.1701E7	5.6335E7	2.4407E7	2.5517E7	2.8089E7	2.7171E7	3.2836E7	4.7392E7	4.7125E7	5.2323E7										3.133E7	3.916E7				2.127E7	2.0006E7	2.1276E7			2	F2:12591	3399_02.raw	20	2	1	2	1
1	2	P02452|CO1A1_HUMAN	R.TGDAGPVGPP(+15.99)GP(+15.99)PGPP(+15.99)GPP(+15.99)GPPSAGFDF.S	Y	56.78	2559.1553	28	4.2	1280.5903	2	51.45	1.1389E8		5.6615E7	2.3366E7	2.3827E7	2.6842E7	2.5884E7	2.5139E7	3.4264E7	3.505E7	3.248E7										9.7552E7	5.6938E7				4.0506E7		4.4141E7			3	F3:17357	3399_03.raw	28	3	0	2	1
1	2	P02452|CO1A1_HUMAN	R.GNDGATGAAGP(+15.99)PGPTGPAGP(+15.99)P(+15.99)GFP(+15.99)GAVGAK.G	Y	56.69	2563.1938	30	1.1	855.4061	3	33.66												1.1153E7	2.0577E7	1.3829E7																	13	F13:10828	4371_02.raw	3	0	0	0	0
1	2	P02452|CO1A1_HUMAN	K.TGPP(+15.99)GPAGQDGRPGP(+15.99)P(+15.99)GPP(+15.99)GAR.G	Y	56.65	2055.9722	22	1.9	686.3326	3	17.63						0												2.6741E8							1.9311E8						6	F6:4910	3849_01.raw	2	0	0	0	0
1	2	P02452|CO1A1_HUMAN	R.GFP(+15.99)GLP(+15.99)GPSGEP(+15.99)GK.Q	N	56.55	1343.6356	14	2.4	672.8267	2	32.34	1.169E9	1.081E9	1.1536E9	7.9408E8	7.5362E8	9.4291E8	8.9552E8	8.872E8	6.669E8	7.3969E8	7.3705E8	1.8827E8	1.4035E8	1.2466E8	1.0901E8	1.0411E8	9.8066E7	2.4521E8	2.5317E8	2.571E8	8.4386E8	1.1847E9	1.8981E8	0	8.9162E7	7.1615E8	7.0278E8	6.6559E8	9.5498E7	1.0044E8	7	F7:10373	3849_02.raw	30	1	1	1	1
1	2	P02452|CO1A1_HUMAN	K.DGLNGLPGPIGP(+15.99)P(+15.99)GPR.G	Y	56.50	1544.7946	16	1.4	773.4056	2	41.33	1.0374E7	0	8.6254E6	4.3988E6	3.105E6	7.5186E6	6.5449E6	5.8582E6	1.0434E7	8.1637E6	8.9796E6											6.2499E6				0	4.3457E6	3.5031E6			7	F7:13632	3849_02.raw	14	1	0	1	1
1	2	P02452|CO1A1_HUMAN	R.GVPGP(+15.99)PGAVGPAGK.D	Y	56.47	1175.6298	14	2.4	588.8235	2	20.64																									3.4366E7						25	F25:6122	6313_03.raw	1	0	0	0	0
1	2	P02452|CO1A1_HUMAN	K.TGP(+15.99)P(+15.99)GPAGQDGRP(+15.99)GP(+15.99)P(+15.99)GP(+15.99)PGAR.G	Y	56.46	2087.9619	22	0.8	696.9951	3	14.18																		7.5982E6			0				5.6558E6				3.9853E6	3.164E6	25	F25:3522	6313_03.raw	4	0	0	0	0
1	2	P02452|CO1A1_HUMAN	P.AGFAGPP(+15.99)GADGQP(+15.99)GAK.G	N	56.44	1428.6632	16	0.2	715.3390	2	20.36						1.2015E7	1.0356E7	1.26E7																							7	F7:5956	3849_02.raw	3	0	0	0	0
1	2	P02452|CO1A1_HUMAN	R.GFPGLP(+15.99)GPSGEPGK.Q	N	56.42	1311.6459	14	0.0	656.8302	2	36.97	1.032E8	9.4155E7	9.7756E7	6.3883E7	6.6927E7	5.8715E7	5.8872E7	5.9668E7	8.1558E7	8.0477E7	8.8385E7	2.6725E6						0	5.7911E6	5.4114E6	7.6315E7	9.9021E7	4.7805E6	4.3983E6	5.1585E6	6.5596E7	6.1719E7	5.6251E7			7	F7:12181	3849_02.raw	22	1	1	1	1
1	2	P02452|CO1A1_HUMAN	R.GPAGPQGP(+15.99)RGDKGETGEQGDR.G	Y	56.21	2080.9521	21	0.7	521.2457	4	13.25	9.8818E6	9.655E6	9.4355E6			0	0	1.9297E6		1.2072E6											0					2.2876E5	4.619E5	2.3367E6			2	F2:3289	3399_02.raw	11	2	2	2	0
1	2	P02452|CO1A1_HUMAN	R.GLTGPIGPP(+15.99)GPAGAP(+15.99)GDKGESGPSGPAGPTGARG.A	Y	56.14	2925.4216	34	0.6	976.1484	3	30.37	4.3424E7	3.7872E7	3.7889E7					1.6882E7													2.1049E7	3.1589E7	1.0371E7		1.0355E7						2	F2:9794	3399_02.raw	8	1	1	1	0
1	2	P02452|CO1A1_HUMAN	E.TGPAGRP(+15.99)GEVGPP(+15.99)GPP(+15.99)GPAGEK.G	Y	56.10	2028.9863	22	0.6	677.3364	3	17.37	1.0363E7	9.9343E6	1.049E7	7.608E6	7.0138E6	7.7844E6	8.6881E6	7.6354E6	9.8382E6	9.0183E6	1.1383E7	2.146E6									4.5488E6	5.41E6		1.2943E6	1.306E6	4.4744E6	4.3939E6	4.6745E6			11	F11:4879	4312_03.raw	19	1	1	1	1
1	2	P02452|CO1A1_HUMAN	R.GFP(+15.99)GADGVAGPK.G	Y	56.06	1087.5298	12	-1.9	544.7711	2	26.02	2.3099E9	2.2157E9	2.4633E9	1.5511E9	1.5773E9	1.4132E9	1.4389E9	1.2993E9	1.5269E9	1.5772E9	1.5766E9	3.0482E8	2.8787E8	2.6179E8	2.5127E8	2.2324E8	2.3677E8	2.827E8	3.0322E8	2.9468E8	1.881E9	2.408E9	2.6213E8	2.4348E8	2.4146E8	1.3243E9	1.3423E9	1.2846E9	8.2696E7	8.5947E7	7	F7:8021	3849_02.raw	30	1	1	1	1
1	2	P02452|CO1A1_HUMAN	R.GP(+15.99)SGPQGP(+15.99)GGPP(+15.99)GPK.G	Y	56.02	1333.6261	15	0.9	667.8209	2	14.16			2.7928E7	1.4203E7																						1.2014E7	1.3816E7	1.0954E7			26	F26:3436	6401_01.raw	5	0	0	1	1
1	2	P02452|CO1A1_HUMAN	E.AGAQGPPGPAGPAGER.G	Y	55.96	1388.6796	16	2.7	695.3489	2	17.12											2.6374E6																				11	F11:4754	4312_03.raw	1	0	0	0	0
1	2	P02452|CO1A1_HUMAN	P.SGNAGPP(+15.99)GPP(+15.99)GPAGK.E	Y	55.88	1291.6156	15	0.5	646.8154	2	14.76				3.7476E6	4.3481E6	1.9277E7	2.369E7	1.9608E7										1.3082E6	1.3678E6	1.8363E6	0					3.6212E6	3.5442E6	3.0986E6	1.964E6	1.9145E6	20	F20:3735	4484_03.raw	13	0	0	0	1
1	2	P02452|CO1A1_HUMAN	R.GEP(+15.99)GP(+15.99)PGPAGAAGPAGNP(+15.99)GADGQP(+15.99)GAK.G	Y	55.88	2315.0413	27	0.5	772.6881	3	17.93																			4.6577E7											1.2095E7	19	F19:4857	4484_02.raw	2	0	0	0	0
1	2	P02452|CO1A1_HUMAN	R.GVQGPP(+15.99)GPAGPR.G	Y	55.80	1104.5675	12	0.9	553.2915	2	16.53	2.952E9	2.8276E9	3.1187E9	1.7845E9	1.8576E9	2.2592E9	2.1278E9	1.9708E9	1.6251E9	1.6551E9	1.7507E9	4.4241E8	3.9025E8	3.6437E8	3.1156E8	2.9271E8	2.6826E8	3.8766E8	4.2551E8	3.9034E8	1.7267E9	2.3905E9	3.4932E8	3.4834E8	3.1171E8	1.5042E9	1.6413E9	1.5253E9	6.2985E7	5.7171E7	24	F24:4536	6313_02.raw	46	3	3	3	1
1	2	P02452|CO1A1_HUMAN	L.TGPIGPP(+15.99)GPAGAP(+15.99)GDK.G	Y	55.79	1419.6993	16	1.6	710.8581	2	20.79						1.615E7	1.5719E7	1.5191E7																							7	F7:6158	3849_02.raw	3	0	0	0	0
1	2	P02452|CO1A1_HUMAN	P.AGPP(+15.99)GPIGNVGAP(+15.99)GAK.G	Y	55.62	1390.7203	16	-2.4	696.3658	2	24.78				3.9183E7	3.7318E7	1.2591E8	1.1915E8	1.1928E8							0			9.0618E6	9.0102E6	8.4061E6	7.2648E6	1.2005E7				3.4354E7	3.1974E7	3.304E7	2.1762E7	2.0568E7	7	F7:7686	3849_02.raw	15	0	0	0	1
1	2	P02452|CO1A1_HUMAN	R.GETGPAGP(+15.99)PGAPGAP(+15.99)GAP(+15.99)GPVGPAGK.S	Y	55.61	2168.0496	26	2.3	723.6921	3	23.98	1.3535E8										1.6901E8										7.2E7	9.8992E7	1.7421E7								11	F11:7455	4312_03.raw	5	1	0	0	0
1	2	P02452|CO1A1_HUMAN	R.GETGP(+15.99)AGRPGEVGPP(+15.99)GPP(+15.99)GPAGEK.G	Y	55.59	2215.0503	24	0.5	739.3577	3	18.28	1.4869E9	1.452E9		7.2351E8		1.0834E9					7.7325E8		1.6688E8	1.4558E8					1.9117E8	1.8403E8	9.079E8	1.2997E9			1.3892E8			7.7962E8			11	F11:5203	4312_03.raw	13	1	1	0	1
1	2	P02452|CO1A1_HUMAN	R.GQAGVM(+15.99)GFP(+15.99)GP(+15.99)K.G	Y	55.55	1192.5546	12	2.1	597.2858	2	23.14	8.2617E7	7.4552E7	8.4457E7	4.6322E7	4.455E7	5.4682E7	5.1368E7	5.2071E7	4.4351E7	4.5975E7	4.9001E7	1.061E7	0	0	9.6654E6	8.8053E6	9.188E6	1.1062E7	1.3304E7	1.2462E7	4.4374E7	6.175E7	0	8.9495E6	0	3.7274E7	3.5821E7	3.5502E7			22	F22:7173	5289_03_r.raw	24	1	1	1	1
1	2	P02452|CO1A1_HUMAN	R.GAP(+15.99)GDRGEP(+15.99)GP(+15.99)PGPAGFAGP(+15.99)P(+15.99)GADGQP(+15.99)GAK.G	Y	55.53	2734.2217	30	1.7	912.4161	3	21.91		1.8767E7																			8.756E6	4.9901E6									22	F22:6666	5289_03_r.raw	3	0	1	0	0
1	2	P02452|CO1A1_HUMAN	K.GDAGP(+15.99)PGP(+15.99)AGPAGPP(+15.99)GPIGNVGAP(+15.99)GAK.G	Y	55.51	2296.1082	27	1.3	766.3776	3	29.79					1.1059E8																							1.0894E8			5	F5:9451	3484_03_r.raw	2	0	0	0	0
1	2	P02452|CO1A1_HUMAN	K.GSPGADGP(+15.99)AGAP(+15.99)GTP(+15.99)GPQGIAGQR.G	Y	55.50	2119.9880	24	2.2	707.6715	3	22.44	3.009E8			1.8173E8		1.3556E8												4.1955E7	4.0258E7		2.2015E8	2.7192E8					1.6996E8	1.671E8	1.5781E7	2.6689E7	28	F28:6696	6401_03.raw	12	1	0	0	1
1	2	P02452|CO1A1_HUMAN	K.TGPP(+15.99)GPAGQDGRP(+15.99)GPPGPP(+15.99)GAR.G	Y	55.50	2039.9772	22	1.3	681.0005	3	17.90	3.7528E7	3.629E7	3.7579E7	1.5392E7	1.5548E7	2.979E7	3.0483E7	2.8289E7	2.7766E7	2.5279E7	2.8225E7							4.2524E6			1.8661E7	2.4615E7				2.4399E7	2.5317E7	2.2038E7			7	F7:5027	3849_02.raw	17	1	1	1	1
1	2	P02452|CO1A1_HUMAN	K.DGLN(+.98)GLP(+15.99)GPIGPP(+15.99)GPR.G	Y	55.48	1545.7786	16	1.4	773.8976	2	40.50	1.0539E7	9.4616E6	8.5408E6	0	4.0793E6	0	3.9155E6	2.854E6	1.1257E7	9.4396E6	8.1051E6										1.0715E7	1.1436E7				6.8875E6	4.1113E6	3.5349E6			9	F9:13662	4312_01.raw	16	1	1	1	0
1	2	P02452|CO1A1_HUMAN	R.GLTGPIGPP(+15.99)GPAGAP(+15.99)GDKG.E	Y	55.46	1646.8263	19	0.9	824.4211	2	29.21	3.128E8	2.7405E8	3.0381E8	2.0782E8	2.0647E8	2.0835E8	2.1064E8	2.0781E8	3.4933E8	3.4904E8	3.5003E8	3.2615E7	3.3734E7	2.998E7				4.1956E7	4.6324E7	4.5544E7	1.7828E8	2.4819E8	2.8489E7	2.5972E7	2.4641E7	1.3919E8	1.3867E8	1.3481E8			25	F25:8941	6313_03.raw	28	2	2	2	1
1	2	P02452|CO1A1_HUMAN	K.TGP(+15.99)P(+15.99)GPAGQDGRP(+15.99)GP(+15.99)P(+15.99)GP(+15.99)P(+15.99)GAR.G	Y	55.33	2103.9568	22	2.0	702.3276	3	13.86	3.6812E6	3.3203E6	4.3106E6	4.5263E5	4.6228E5				2.2817E6	2.221E6	2.806E6									2.6453E5	1.2004E6	1.5228E6				7.8465E5	8.3999E5	5.9215E5	2.929E5		10	F10:3454	4312_02.raw	15	1	1	1	1
1	2	P02452|CO1A1_HUMAN	K.GDRGETGPAGP(+15.99)P(+15.99)GAP(+15.99)GAP(+15.99)GAP(+15.99)GPVGPAGK.S	Y	55.27	2528.1890	29	0.6	843.7374	3	19.29						5.5036E6	6.7329E6																								6	F6:5590	3849_01.raw	2	0	0	0	0
1	2	P02452|CO1A1_HUMAN	K.GEPGP(+15.99)VGVQGPP(+15.99)GPAGEEGK.R	Y	55.20	1846.8696	20	1.2	616.6312	3	24.98		0	4.3791E7				2.7814E8	2.9063E8				8.1686E7		5.8308E7	6.6596E7				8.7454E7		5.894E8			1.0849E8	1.1694E8	4.3853E8		4.8194E8			8	F8:7673	3849_03.raw	12	0	0	1	0
1	2	P02452|CO1A1_HUMAN	K.TGPP(+15.99)GPAGQDGRP(+15.99)GP(+15.99)P(+15.99)GP(+15.99)PGAR.G	Y	55.17	2071.9670	22	1.6	691.6641	3	14.97														5.4992E7		3.6604E7			4.9476E7	4.8327E7					3.4851E7						25	F25:3708	6313_03.raw	5	0	0	0	0
1	2	P02452|CO1A1_HUMAN	R.GP(+15.99)P(+15.99)GP(+15.99)MGP(+15.99)PGLAGPP(+15.99)GESGR.E	Y	55.04	1863.8419	20	0.6	932.9288	2	24.66													3.3573E6						4.4723E6												19	F19:7516	4484_02.raw	2	0	0	0	0
1	2	P02452|CO1A1_HUMAN	R.GETGPAGRP(+15.99)GEVGP(+15.99)P(+15.99)GP(+15.99)P(+15.99)GP(+15.99)AGEK.G	Y	55.02	2263.0352	24	0.6	755.3528	3	16.23	6.8411E6	0	0			0	9.5111E6	0	0	4.9393E6											3.7738E6	4.8754E6				2.492E6	2.6638E6				7	F7:4314	3849_02.raw	7	1	0	0	0
1	2	P02452|CO1A1_HUMAN	K.TGPP(+15.99)GPAGQDGRP(+15.99)GP(+15.99)PGP(+15.99)P(+15.99)GAR.G	Y	54.95	2071.9670	22	0.5	691.6633	3	15.68								1.6643E8	1.3354E8																						8	F8:3815	3849_03.raw	2	0	0	0	0
1	2	P02452|CO1A1_HUMAN	K.GDAGP(+15.99)P(+15.99)GPAGPAGP(+15.99)P(+15.99)GPIGNVGAP(+15.99)GAK.G	Y	54.84	2312.1030	27	-0.5	1157.0582	2	28.53								1.1748E6																							8	F8:9051	3849_03.raw	1	0	0	0	0
1	2	P02452|CO1A1_HUMAN	R.VGP(+15.99)PGP(+15.99)SGNAGPPGP(+15.99)P(+15.99)GPAGK.E	Y	54.78	1827.8750	21	1.6	914.9462	2	17.90																											6.8904E7				27	F27:4836	6401_02.raw	1	0	0	0	0
1	2	P02452|CO1A1_HUMAN	R.GP(+15.99)PGP(+15.99)MGPPGLAGPP(+15.99)GESGR.E	Y	54.55	1831.8522	20	-2.3	611.6233	3	28.25			1.8988E8					8.6315E7				1.8241E7																			12	F12:8737	4371_01.raw	3	0	0	1	0
1	2	P02452|CO1A1_HUMAN	R.GVQGP(+15.99)P(+15.99)GPAGPR.G	Y	54.46	1120.5625	12	-0.8	561.2881	2	15.62	6.0339E7	5.4727E7	5.9422E7	3.1421E7	2.9373E7	7.1508E7	7.0953E7	6.5265E7	4.0753E7	4.0526E7	4.4029E7	2.4755E7	1.9376E7	2.0829E7	1.8232E7	1.5389E7	1.5012E7	1.1778E7	1.0672E7	1.1543E7	3.1465E7	5.0033E7	1.1536E7		1.1089E7	2.6359E7	2.6542E7	2.5395E7		2.8609E6	7	F7:4075	3849_02.raw	28	1	1	1	1
1	2	P02452|CO1A1_HUMAN	K.GDAGPP(+15.99)GPAGPAGPP(+15.99)GPIGN.V	Y	54.45	1683.7852	20	2.4	842.9019	2	29.05	2.5046E6	4.2084E6	2.5613E6	4.8026E6	3.4966E6	4.8096E6	3.6946E6	4.8961E6	7.3046E6	8.1543E6	7.3226E6											1.7212E6				3.2257E6	3.3898E6	4.1236E6			9	F9:9346	4312_01.raw	15	1	1	1	1
1	2	P02452|CO1A1_HUMAN	R.GPSGPQGPGGPPGP(+15.99)K.G	Y	54.27	1301.6364	15	2.4	651.8270	2	17.25								2.6616E6														0					3.4004E6				22	F22:4834	5289_03_r.raw	2	0	0	0	0
1	2	P02452|CO1A1_HUMAN	K.TGP(+15.99)PGPAGQDGRP(+15.99)GP(+15.99)P(+15.99)GP(+15.99)PGAR.G	Y	54.25	2071.9670	22	1.8	691.6642	3	15.01																								3.4592E7							24	F24:3723	6313_02.raw	1	0	0	0	0
1	2	P02452|CO1A1_HUMAN	K.TGP(+15.99)P(+15.99)GPAGQDGRP(+15.99)GPP(+15.99)GP(+15.99)PGAR.G	Y	54.22	2071.9670	22	0.9	691.6636	3	15.69														5.4992E7					4.9476E7									0	1.5257E7		14	F14:3977	4371_03.raw	3	0	0	0	0
1	2	P02452|CO1A1_HUMAN	R.P(+15.99)GEVGPP(+15.99)GPP(+15.99)GPAGEK.G	Y	54.19	1489.7047	16	1.3	745.8606	2	18.70	1.1222E8	1.1145E8	1.1866E8	1.1626E8	1.1395E8	1.5785E8	1.6606E8	1.5228E8	1.5238E8	1.4999E8	1.6015E8	2.3355E7	2.3601E7	2.2611E7	2.6562E7	2.4742E7	2.6494E7	3.5836E7	3.6918E7	3.7331E7	6.1698E7	9.009E7	7.6521E6	5.9522E6	6.1454E6	1.0049E8	1.0526E8	9.7084E7	3.6195E6	3.4111E6	17	F17:5288	4406_03.raw	30	1	1	1	1
1	2	P02452|CO1A1_HUMAN	R.VGPP(+15.99)GP(+15.99)SGNAGPP(+15.99)GPP(+15.99)GPAGK.E	Y	53.92	1827.8750	21	1.3	914.9460	2	18.92													2.8577E7			2.3431E7				3.1592E7	1.1287E8		5.4819E7						3.2787E6		16	F16:5179	4406_02.raw	6	0	0	0	0
1	2	P02452|CO1A1_HUMAN	R.GNDGATGAAGPPGP(+15.99)TGPAGPP(+15.99)GFPGAVGAK.G	Y	53.80	2531.2039	30	0.6	844.7424	3	35.87		6.9695E7								4.8308E7																					2	F2:12073	3399_02.raw	2	0	1	0	0
1	2	P02452|CO1A1_HUMAN	R.GETGPAGP(+15.99)PGAP(+15.99)GAPGAP(+15.99)GPVGPAGK.S	Y	53.71	2168.0496	26	2.0	723.6919	3	23.99					1.2846E8									1.6352E7																	5	F5:7561	3484_03_r.raw	2	0	0	0	0
1	2	P02452|CO1A1_HUMAN	K.DGEAGAQGPPGPAGP(+15.99)AGERGEQGPAGSP(+15.99)GFQGLP(+15.99)GPAGPP(+15.99)GEAGKP(+15.99)GEQGVPGDLGAP(+15.99)GPSGAR.G	Y	53.66	5783.6704	64	2.2	1157.7439	5	37.90				0																											4	F4:12669	3484_02.raw	0	0	0	0	0
1	2	P02452|CO1A1_HUMAN	R.GEQGPAGSP(+15.99)GFQGLP(+15.99)GPAGP(+15.99)P(+15.99)GEAGKP(+15.99)GEQGVPGDLGAP(+15.99)GPSGAR.G	Y	53.65	4111.9106	45	0.5	1028.9855	4	35.64	7.6021E8																														1	F1:12606	3399_01.raw	1	1	0	0	0
1	2	P02452|CO1A1_HUMAN	R.GN(+.98)DGATGAAGPP(+15.99)GPTGPAGPP(+15.99)GFPGAVGAK.G	Y	53.41	2532.1880	30	5.0	845.0742	3	36.71			0																		0	0				0					26	F26:12048	6401_01.raw	0	0	0	0	0
1	2	P02452|CO1A1_HUMAN	R.GP(+15.99)PGP(+15.99)MGP(+15.99)PGLAGPP(+15.99)GESGR.E	Y	53.34	1847.8470	20	2.4	616.9578	3	25.19									1.6104E8																						9	F9:8121	4312_01.raw	1	0	0	0	0
1	2	P02452|CO1A1_HUMAN	K.NGDDGEAGKPGRP(+15.99)GERGPP(+15.99)GPQGAR.G	Y	53.32	2460.1489	25	1.8	493.0379	5	13.48	2.069E7	9.1577E6	2.417E7				3.304E6	3.0473E6																		3.5235E6	3.1798E6	3.599E6			26	F26:3330	6401_01.raw	10	2	1	2	0
1	2	P02452|CO1A1_HUMAN	R.GFPGLP(+15.99)GPSGEP(+15.99)GK.Q	N	53.27	1327.6407	14	1.5	664.8287	2	34.30	1.0521E9	9.5446E8	1.035E9	7.0994E8	6.6653E8	5.7435E8	4.692E8	5.4391E8	6.5986E8	6.7283E8	7.13E8		0	0				9.3001E7	9.5603E7		6.6148E8	9.1803E8	0	0	7.2137E7	5.4301E8	4.8834E8	5.1701E8			7	F7:11488	3849_02.raw	23	1	1	1	1
1	2	P02452|CO1A1_HUMAN	R.GEPGPP(+15.99)GP(+15.99)AGAAGPAGNP(+15.99)GADGQPGAK.G	Y	53.02	2299.0464	27	3.5	767.3588	3	19.00										4.9309E7		7.3797E6	5.9361E6	5.7863E6					9.196E6					6.8547E6							24	F24:5327	6313_02.raw	6	0	0	0	0
1	2	P02452|CO1A1_HUMAN	R.GLP(+15.99)GPP(+15.99)GAP(+15.99)GPQGFQGP(+15.99)P(+15.99)GEP(+15.99)GEP(+15.99)GASGP(+15.99)MGPR.G	Y	52.91	3131.3889	33	-2.4	1044.8010	3	31.93								1.1533E7																							8	F8:10269	3849_03.raw	1	0	0	0	0
1	2	P02452|CO1A1_HUMAN	K.TGPP(+15.99)GPAGQDGRPGP(+15.99)PGPP(+15.99)GAR.G	Y	52.84	2039.9772	22	0.5	681.0000	3	16.79		3.629E7	3.7579E7		1.5548E7	2.979E7		2.8289E7											4.4212E6	3.8301E6	1.8661E7	2.4615E7									22	F22:4684	5289_03_r.raw	9	0	1	1	0
1	2	P02452|CO1A1_HUMAN	K.DGEAGAQGPPGP(+15.99)AGPAGERGEQGPAGSP(+15.99)GFQGLP(+15.99)GPAGP(+15.99)PGEAGKP(+15.99)GEQGVP(+15.99)GDLGAP(+15.99)GPSGAR.G	Y	52.71	5799.6655	64	1.8	1160.9425	5	36.09																					9.4999E7										21	F21:11624	5289_01.raw	1	0	0	0	0
1	2	P02452|CO1A1_HUMAN	R.GEP(+15.99)GPTGLP(+15.99)GP(+15.99)PGER.G	Y	52.63	1464.6843	15	3.3	733.3519	2	23.74		0	0									0				3.051E8		0	0	0		2.2242E6	0								3	F3:7441	3399_03.raw	2	0	0	0	0
1	2	P02452|CO1A1_HUMAN	D.GPAGAP(+15.99)GTPGPQGIAGQR.G	Y	52.60	1603.8066	18	1.3	802.9116	2	22.48	3.6887E6	3.6553E6	4.9291E6	2.4764E6																		1.6767E6				1.3663E6	1.5118E6				4	F4:6898	3484_02.raw	7	1	1	1	1
1	2	P02452|CO1A1_HUMAN	R.GLTGPIGP(+15.99)PGPAGAP(+15.99)GDKGESGPSGPAGPTGARG.A	Y	52.58	2925.4216	34	1.0	976.1488	3	30.33						1.8218E7				5.0605E6														1.1105E7		1.7761E7					24	F24:9488	6313_02.raw	4	0	0	0	0
1	2	P02452|CO1A1_HUMAN	R.GLP(+15.99)GP(+15.99)PGAP(+15.99)GPQGFQGP(+15.99)P(+15.99)GEP(+15.99)GEP(+15.99)GASGP(+15.99)MGPR.G	Y	52.46	3131.3889	33	3.6	1044.8074	3	31.98						1.3003E7	1.0578E7																								6	F6:10418	3849_01.raw	2	0	0	0	0
1	2	P02452|CO1A1_HUMAN	R.GFP(+15.99)GADGVAGP(+15.99)K.G	Y	52.42	1103.5247	12	1.0	552.7701	2	24.16	3.1849E7	3.1958E7	3.4724E7	3.3311E7	3.088E7	2.9852E7	2.515E7	2.444E7	4.8277E7	4.5735E7	4.7548E7	6.9259E6		5.9487E6			1.4457E7		1.2573E7	1.4327E7	2.4745E7	3.3975E7	4.9703E6			1.709E7	1.7455E7	1.6609E7			2	F2:7645	3399_02.raw	22	1	1	1	1
1	2	P02452|CO1A1_HUMAN	K.GSPGADGPAGAP(+15.99)GTPGPQGI.A	Y	52.28	1675.7802	20	2.2	838.8992	2	33.27						4.3637E7	3.8494E7	3.6486E7		2.1158E6	2.3517E6																				7	F7:10817	3849_02.raw	5	0	0	0	0
1	2	P02452|CO1A1_HUMAN	R.GLP(+15.99)GPP(+15.99)GAP(+15.99)GPQGFQGP(+15.99)PGEP(+15.99)GEP(+15.99)GASGP(+15.99)MGPR.G	Y	52.20	3115.3938	33	-1.0	779.8550	4	33.69								2.0622E7	5.1945E6													2.1891E7	1.7237E7			7.9791E6		8.6248E6			8	F8:10868	3849_03.raw	7	0	0	0	0
1	2	P02452|CO1A1_HUMAN	R.GFP(+15.99)GLPGPSGEPGK.Q	N	52.20	1311.6459	14	0.0	656.8302	2	36.97	1.032E8	9.4155E7	9.7756E7	6.3883E7	6.6927E7	5.8715E7	5.8872E7	5.9668E7	8.1558E7	8.0477E7	8.8385E7										7.6315E7	9.9021E7				6.5596E7	6.1719E7	5.6251E7			7	F7:12350	3849_02.raw	16	1	1	1	1
1	2	P02452|CO1A1_HUMAN	A.TGAAGP(+15.99)PGPTGPAGPP(+15.99)GFP(+15.99)GAVGAK.G	Y	52.18	2133.0488	25	1.9	712.0249	3	32.10			7.6127E6																												3	F3:10559	3399_03.raw	1	0	0	1	0
1	2	P02452|CO1A1_HUMAN	R.GEPGP(+15.99)P(+15.99)GPAGFAGPP(+15.99)GADGQP(+15.99)GAK.G	Y	52.13	2148.9709	24	1.6	1075.4945	2	28.32		2.5818E8			0					0																				1.5664E7	10	F10:9114	4312_02.raw	2	0	1	0	0
1	2	P02452|CO1A1_HUMAN	R.GPP(+15.99)GPMGPP(+15.99)GLAGPP(+15.99)GESGR.E	Y	52.10	1831.8522	20	-0.5	611.6244	3	26.90		1.7275E8																													2	F2:8430	3399_02.raw	1	0	1	0	0
1	2	P02452|CO1A1_HUMAN	D.RGETGPAGP(+15.99)PGAP(+15.99)GAP(+15.99)GAP(+15.99)GPVGPAGK.S	Y	52.05	2340.1458	27	1.7	781.0572	3	19.47						1.4447E7	1.5368E7						2.7012E6			3.9599E6							2.5811E6					6.0531E6			23	F23:5549	6313_01.raw	6	0	0	0	0
1	2	P02452|CO1A1_HUMAN	R.GPPGP(+15.99)MGPPGLAGP(+15.99)PGESGR.E	Y	52.01	1815.8573	20	1.2	908.9370	2	28.36																												3.2907E6			28	F28:9036	6401_03.raw	1	0	0	0	0
1	2	P02452|CO1A1_HUMAN	K.NGDDGEAGKPGRP(+15.99)GERGPPGP(+15.99)QGAR.G	Y	51.92	2460.1489	25	0.2	493.0371	5	13.43			1.092E7			4.1645E6																		2.6923E6							24	F24:3255	6313_02.raw	3	0	0	1	0
1	2	P02452|CO1A1_HUMAN	K.TGP(+15.99)P(+15.99)GPAGQDGRPGP(+15.99)P(+15.99)GP(+15.99)P(+15.99)GAR.G	Y	51.92	2087.9619	22	-0.4	696.9943	3	14.10		3.6923E7		2.3663E7																											2	F2:3493	3399_02.raw	2	0	1	0	1
1	2	P02452|CO1A1_HUMAN	P.AGPP(+15.99)GAP(+15.99)GAPGAP(+15.99)GPVGPAGK.S	Y	51.75	1726.8636	21	2.6	864.4413	2	22.23							1.6849E7	1.5745E7																							8	F8:6695	3849_03.raw	2	0	0	0	0
1	2	P02452|CO1A1_HUMAN	P.AGP(+15.99)PGAPGAP(+15.99)GAP(+15.99)GPVGPAGK.S	Y	51.74	1726.8636	21	2.6	864.4413	2	22.23								1.5745E7																							8	F8:6589	3849_03.raw	1	0	0	0	0
1	2	P02452|CO1A1_HUMAN	M.GPPGLAGPP(+15.99)GESGR.E	Y	51.64	1263.6207	14	0.6	632.8180	2	21.96				1.2707E7	1.2106E7	1.6171E7	1.7728E7	1.8265E7	8.6868E6	9.1069E6	9.9538E6	3.4472E5	5.4033E5	7.0664E5							7.1901E6	1.0563E7				7.3952E6	7.5382E6	7.2313E6	7.8205E6	8.3226E6	8	F8:6502	3849_03.raw	18	0	0	0	1
1	2	P02452|CO1A1_HUMAN	R.GSEGPQGVR.G	Y	51.59	885.4304	9	0.0	443.7225	2	13.66	1.1693E7	1.0861E7	1.4178E7	4.9758E6	3.1561E6	0	7.6826E6	7.0645E6	7.2936E6	7.7565E6	7.072E6	9.4132E5	1.6759E6						9.2815E4		9.4417E5	7.0868E6	9.8812E5			3.5802E6	7.2664E6	6.0714E6			7	F7:3311	3849_02.raw	19	1	1	1	1
1	2	P02452|CO1A1_HUMAN	R.GEP(+15.99)GP(+15.99)P(+15.99)GPAGAAGPAGNP(+15.99)GADGQP(+15.99)GAK.G	Y	51.54	2331.0361	27	1.2	1166.5267	2	17.01						1.6256E7							1.1354E7																		6	F6:4713	3849_01.raw	2	0	0	0	0
1	2	P02452|CO1A1_HUMAN	K.GEPGP(+15.99)VGVQGP(+15.99)P(+15.99)GPAGEEGK.R	Y	51.51	1862.8645	20	2.5	932.4418	2	21.45	6.3765E7	6.0317E7	2.2024E7		1.5552E7	3.9634E7			1.2847E7	1.46E7								5.8452E6			3.6709E7	5.3371E7			5.1378E6	7.8183E6	9.9526E6		5.2362E6	3.5194E6	29	F29:6164	6474_01.raw	15	1	1	1	0
1	2	P02452|CO1A1_HUMAN	R.GAP(+15.99)GDRGEP(+15.99)GPP(+15.99)GPAGF.A	Y	51.46	1582.7010	17	-0.5	792.3574	2	28.43						1.221E7	1.0059E7	1.2358E7																							7	F7:9023	3849_02.raw	3	0	0	0	0
1	2	P02452|CO1A1_HUMAN	R.GNDGATGAAGPPGP(+15.99)TGPAGPP(+15.99)GFP(+15.99)GAVGAK.G	Y	51.38	2547.1987	30	0.4	850.0739	3	35.60			5.2226E7																			3.0396E7				2.1877E7	2.6687E7				26	F26:11583	6401_01.raw	4	0	0	1	0
1	2	P02452|CO1A1_HUMAN	R.GQAGVM(+15.99)GFP(+15.99)GPK(+15.99).G	Y	51.29	1192.5546	12	0.9	597.2851	2	24.45						5.4682E7																									6	F6:7640	3849_01.raw	1	0	0	0	0
1	2	P02452|CO1A1_HUMAN	K.DGLNGLPGPIGP(+15.99)PGP(+15.99)R.G	Y	51.28	1544.7946	16	1.4	773.4056	2	41.33	1.0374E7					7.5186E6	6.5449E6				8.9796E6										5.3057E6	6.2499E6									7	F7:13720	3849_02.raw	6	1	0	0	0
1	2	P02452|CO1A1_HUMAN	P.AGPAGPPGPIGNVGAP(+15.99)GAK.G	Y	50.94	1599.8368	19	0.6	800.9261	2	30.05						2.5697E6	2.6468E6	2.6989E6																		6.8665E5					8	F8:9595	3849_03.raw	4	0	0	0	0
1	2	P02452|CO1A1_HUMAN	P.AGPP(+15.99)GAP(+15.99)GAP(+15.99)GAPGPVGPAGK.S	Y	50.87	1726.8636	21	-1.2	864.4380	2	22.22						1.3713E7	1.6849E7																								7	F7:6773	3849_02.raw	2	0	0	0	0
1	2	P02452|CO1A1_HUMAN	R.GP(+15.99)PGP(+15.99)MGPPGLAGPPGESGR.E	Y	50.84	1815.8573	20	1.4	606.2939	3	29.25		2.4322E7																			2.0848E7	3.1137E7						7.6281E6			21	F21:9188	5289_01.raw	4	0	1	0	0
1	2	P02452|CO1A1_HUMAN	K.TGPP(+15.99)GPAGQDGRP(+15.99)GPPGP(+15.99)PGAR.G	Y	50.79	2039.9772	22	0.8	681.0002	3	16.81				1.5392E7																											4	F4:4584	3484_02.raw	1	0	0	0	1
1	2	P02452|CO1A1_HUMAN	K.P(+15.99)GEQGVP(+15.99)GDLGAPGP(+15.99)SGAR.G	Y	50.79	1765.8230	19	-2.2	883.9168	2	23.54				1.1431E8			1.3648E8																								7	F7:7511	3849_02.raw	2	0	0	0	1
1	2	P02452|CO1A1_HUMAN	R.GEP(+15.99)GPPGP(+15.99)AGFAGPP(+15.99)GADGQPGAK.G	Y	50.72	2132.9761	24	1.3	712.0002	3	28.50																			3.0164E7												19	F19:9131	4484_02.raw	1	0	0	0	0
1	2	P02452|CO1A1_HUMAN	R.GPSGPQGP(+15.99)GGP(+15.99)PGP(+15.99)K.G	Y	50.62	1333.6261	15	0.6	667.8207	2	13.96						2.7468E7													4.6164E6						2.548E6						6	F6:3672	3849_01.raw	3	0	0	0	0
1	2	P02452|CO1A1_HUMAN	R.GP(+15.99)SGPQGPGGPP(+15.99)GP(+15.99)K.G	Y	50.52	1333.6261	15	0.7	667.8208	2	14.04																					1.3114E7	1.8613E7									22	F22:3796	5289_03_r.raw	2	0	0	0	0
1	2	P02452|CO1A1_HUMAN	P.SGPQGPGGPP(+15.99)GPK.G	Y	50.49	1147.5621	13	0.4	574.7886	2	14.42	1.164E7	1.0927E7	1.1114E7	1.0096E8	9.2998E7	2.1683E8	2.3678E8	2.1283E8	2.9847E7	3.0491E7	3.2893E7	6.6664E6	6.6272E6	7.0273E6	2.2248E7	1.9449E7	0	3.1394E7	3.2566E7	3.349E7	2.5265E7	3.7464E7	1.8768E6	1.5789E6	1.3807E6	6.746E7	7.6072E7	6.9723E7	5.998E6	5.112E6	28	F28:3685	6401_03.raw	29	1	1	1	1
1	2	P02452|CO1A1_HUMAN	R.GLP(+15.99)GP(+15.99)PGAP(+15.99)GPQGFQGP(+15.99)PGEP(+15.99)GEP(+15.99)GASGP(+15.99)MGPR.G	Y	50.48	3115.3938	33	1.6	779.8570	4	32.23	1.4829E7					2.0176E7		1.46E7								1.27E7											8.765E6		7.6456E6	8.6091E6	27	F27:10479	6401_02.raw	7	1	0	0	0
1	2	P02452|CO1A1_HUMAN	K.GDRGETGPAGP(+15.99)PGAPGAP(+15.99)GAP(+15.99)GPVGPAGK.S	Y	50.43	2496.1992	29	2.8	833.0760	3	22.35																							0								23	F23:6645	6313_01.raw	0	0	0	0	0
1	2	P02452|CO1A1_HUMAN	P.AGPP(+15.99)GAPGAP(+15.99)GAP(+15.99)GPVGPAGK.S	Y	50.37	1726.8636	21	2.7	864.4414	2	22.18						1.3713E7																									6	F6:6666	3849_01.raw	1	0	0	0	0
1	2	P02452|CO1A1_HUMAN	R.GFSGLQGP(+15.99)P(+15.99)GPPGSP(+15.99)GEQGPSGASGPAGPR.G	Y	50.35	2704.2476	30	-1.1	902.4221	3	34.58			0																												3	F3:11503	3399_03.raw	0	0	0	0	0
1	2	P02452|CO1A1_HUMAN	E.AGAQGPP(+15.99)GPAGPAGER.G	Y	50.23	1404.6746	16	0.3	703.3448	2	16.59								3.0343E7						5.3849E6	5.3599E6																8	F8:4337	3849_03.raw	3	0	0	0	0
1	2	P02452|CO1A1_HUMAN	R.TGDAGPVGP(+15.99)PGPP(+15.99)GPP(+15.99)GPP(+15.99)GPPSAGFDF.S	Y	50.19	2559.1553	28	4.9	1280.5912	2	49.59	2.6893E6		3.7091E5		0	1.6498E7	0	1.4719E7													4.4469E7						2.0302E7	1.8261E7			21	F21:16335	5289_01.raw	7	1	0	1	0
1	2	P02452|CO1A1_HUMAN	K.NGDDGEAGKP(+15.99)GRP(+15.99)GERGPPGP(+15.99)QGAR.G	Y	50.15	2476.1438	25	0.1	496.2361	5	13.00	1.9116E7		1.823E7				1.7579E7	7.2962E6														5.8578E6									1	F1:3251	3399_01.raw	6	1	0	1	0
1	2	P02452|CO1A1_HUMAN	R.GLP(+15.99)GP(+15.99)PGAPGP(+15.99)QGFQGPPGEP(+15.99)GEP(+15.99)GASGP(+15.99)MGPR.G	Y	49.97	3099.3989	33	0.6	775.8575	4	33.74			1.0579E7						4.4847E7																						3	F3:11204	3399_03.raw	2	0	0	1	0
1	2	P02452|CO1A1_HUMAN	P.TGPAGPP(+15.99)GFP(+15.99)GAVGAK.G	Y	49.93	1411.7095	16	-2.5	706.8602	2	29.47						2.4059E7	2.2255E7	2.1286E7																							7	F7:9417	3849_02.raw	3	0	0	0	0
1	2	P02452|CO1A1_HUMAN	R.GPP(+15.99)GPMGPPGLAGPP(+15.99)GESGR.E	Y	49.89	1815.8573	20	-0.6	606.2927	3	28.38		6.0026E6				1.4168E7	2.1593E6	1.7688E6																							2	F2:9117	3399_02.raw	4	0	1	0	0
1	2	P02452|CO1A1_HUMAN	R.GEPGPTGLP(+15.99)GPP(+15.99)GER.G	Y	49.88	1448.6895	15	6.4	725.3566	2	23.61	6.747E7	6.4262E7	6.6851E7	6.4361E7	6.7123E7					4.041E7	4.3589E7												2.757E6		2.2674E6			8.6501E6			23	F23:7144	6313_01.raw	10	1	1	1	1
1	2	P02452|CO1A1_HUMAN	P.AGPP(+15.99)GFP(+15.99)GAVGAK.G	Y	49.81	1156.5875	13	0.0	579.3010	2	26.34				3.0754E7	2.9834E7	8.2808E7	8.2756E7	8.3247E7	2.0863E6	1.7823E6	2.7405E6		5.4417E5					4.7976E6	4.2699E6	5.1587E6	7.3012E6	9.9434E6				2.3576E7	2.4655E7	2.2833E7	1.3303E7	1.4307E7	7	F7:8316	3849_02.raw	19	0	0	0	1
1	2	P02452|CO1A1_HUMAN	K.GSP(+15.99)GADGPAGAP(+15.99)GTPGPQGI.A	Y	49.76	1691.7750	20	2.1	846.8966	2	32.20				6.1719E6		1.2152E8	1.0141E8	1.032E8	1.0904E7	1.3214E7	1.2719E7																				7	F7:10460	3849_02.raw	7	0	0	0	1
1	2	P02452|CO1A1_HUMAN	R.GEP(+15.99)GPPGP(+15.99)AGFAGPP(+15.99)GADGQP(+15.99)GAK.G	Y	49.70	2148.9709	24	0.7	717.3314	3	28.17						1.9238E8																									6	F6:8821	3849_01.raw	1	0	0	0	0
1	2	P02452|CO1A1_HUMAN	R.GPSGPQGP(+15.99)GGPP(+15.99)GP(+15.99)KGNSGEP(+15.99)GAP(+15.99)GSK.G	Y	49.69	2404.0889	27	-4.3	802.3668	3	13.89																						1.567E6									22	F22:3564	5289_03_r.raw	1	0	0	0	0
1	2	P02452|CO1A1_HUMAN	R.GFP(+15.99)GADGVAGP(+15.99)KGPAGER.G	Y	49.65	1670.8011	18	1.6	557.9419	3	24.23	2.6054E7	2.3857E7	2.4959E7		1.1137E7	1.3951E7		1.152E7													2.2056E7	2.5931E7									1	F1:7667	3399_01.raw	8	1	1	1	0
1	2	P02452|CO1A1_HUMAN	P.AGFAGPP(+15.99)GADGQPGAK.G	N	49.55	1412.6683	16	-2.8	707.3395	2	22.37						8.5588E6	1.0068E7	9.114E6																							7	F7:6779	3849_02.raw	3	0	0	0	0
1	2	P02452|CO1A1_HUMAN	S.P(+15.99)GEAGRP(+15.99)GEAGLP(+15.99)GAK.G	Y	49.53	1510.7374	16	-1.1	756.3752	2	15.71	2.8809E7	3.1207E7	2.8191E7	2.2384E7	1.9717E7	3.3953E7	4.5785E7	3.8754E7	2.7145E7	2.504E7	2.1913E7	5.6819E6	4.228E6	5.175E6		4.4232E6		4.3842E6	4.7578E6	5.3441E6	1.5555E7	2.1771E7	2.5545E6	2.1442E6	2.5083E6	1.4618E7	1.7513E7	1.4835E7	1.1984E6		7	F7:4086	3849_02.raw	38	1	2	1	2
1	2	P02452|CO1A1_HUMAN	R.GEPGP(+15.99)P(+15.99)GPAGFAGPP(+15.99)GADGQPGAK.G	Y	49.45	2132.9761	24	2.0	712.0007	3	28.42																				2.7067E7									6.9511E6	7.5069E6	20	F20:8824	4484_03.raw	3	0	0	0	0
1	2	P02452|CO1A1_HUMAN	K.GDRGETGPAGP(+15.99)PGAP(+15.99)GAPGAP(+15.99)GPVGPAGK.S	Y	49.35	2496.1992	29	1.4	833.0748	3	21.83																														0	30	F30:6379	6474_02.raw	0	0	0	0	0
1	2	P02452|CO1A1_HUMAN	K.DGLNGLP(+15.99)GPIGP(+15.99)PGP(+15.99)R.G	Y	49.34	1560.7896	16	1.2	781.4030	2	35.74					1.3419E9			1.3584E9					0																		5	F5:11750	3484_03_r.raw	3	0	0	0	0
1	2	P02452|CO1A1_HUMAN	R.GETGP(+15.99)AGRPGEVGPP(+15.99)GPPGP(+15.99)AGEK.G	Y	49.33	2215.0503	24	1.1	739.3582	3	18.45																										7.9774E8		7.7962E8			26	F26:5152	6401_01.raw	2	0	0	0	0
1	2	P02452|CO1A1_HUMAN	P.IGPP(+15.99)GPAGAP(+15.99)GDK.G	Y	49.32	1164.5774	13	2.0	583.2971	2	16.64						9.4886E7	8.547E7	7.9227E7																					1.4051E7	1.3139E7	29	F29:4405	6474_01.raw	5	0	0	0	0
1	2	P02452|CO1A1_HUMAN	R.GNDGATGAAGPP(+15.99)GPTGP.A	Y	49.28	1408.6218	17	2.0	705.3196	2	21.25						3.2713E7	2.9117E7	2.7246E7																							6	F6:6289	3849_01.raw	3	0	0	0	0
1	2	P02452|CO1A1_HUMAN	R.VGP(+15.99)PGP(+15.99)SGNAGPP(+15.99)GPP(+15.99)GPAGK.E	Y	49.07	1827.8750	21	2.4	610.3004	3	17.93				1.4643E8																											4	F4:4932	3484_02.raw	1	0	0	0	1
1	2	P02452|CO1A1_HUMAN	R.GPSGP(+15.99)QGPGGP(+15.99)P(+15.99)GPK.G	Y	48.93	1333.6261	15	0.4	667.8206	2	13.88		2.4086E7														3.4824E6											1.3816E7				16	F16:3418	4406_02.raw	3	0	1	0	0
1	2	P02452|CO1A1_HUMAN	K.DGLNGLP(+15.99)GPIGPPGPR.G	Y	48.90	1528.7997	16	3.4	765.4097	2	40.70	3.0193E6		3.1194E6						4.5441E6	4.1176E6	4.6273E6																				10	F10:13710	4312_02.raw	5	1	0	1	0
1	2	P02452|CO1A1_HUMAN	V.P(+15.99)GPPGAVGPAGK.D	Y	48.89	1019.5399	12	0.0	510.7772	2	21.41	4.1635E6	4.554E6	5.7088E6	3.8022E6	3.0117E6	2.2894E6		2.289E6	3.5052E6	3.4515E6	4.2351E6										2.3893E6						2.2195E6				11	F11:6464	4312_03.raw	12	1	1	1	1
1	2	P02452|CO1A1_HUMAN	R.GPSGP(+15.99)QGPGGPP(+15.99)GP(+15.99)K.G	Y	48.85	1333.6261	15	0.9	667.8209	2	14.39																		4.3342E6													18	F18:3544	4484_01.raw	1	0	0	0	0
1	2	P02452|CO1A1_HUMAN	G.FP(+15.99)GLP(+15.99)GPSGEPGK.Q	N	48.80	1270.6193	13	0.8	636.3174	2	31.50	8.1615E6	6.3995E6	6.6821E6	4.2525E7	3.9678E7	2.6824E7	2.5031E7	2.3107E7	1.3688E7	1.5464E7	1.5894E7							7.9433E6	6.5274E6	7.1885E6	4.8113E6	6.7338E6				1.0788E7	1.0646E7	9.7532E6	4.1863E6		5	F5:10348	3484_03_r.raw	20	1	1	1	1
1	2	P02452|CO1A1_HUMAN	K.GDAGP(+15.99)PGPAGPAGPP(+15.99)GPIGNVGAPGAK.G	Y	48.80	2264.1184	27	1.8	755.7148	3	32.61	5.2911E7		5.1557E7																									3.8787E7			3	F3:10596	3399_03.raw	3	1	0	1	0
1	2	P02452|CO1A1_HUMAN	R.GLTGPIGPP(+15.99)GP.A	N	48.78	977.5181	11	0.8	489.7667	2	36.48				1.3455E7	1.4698E7	2.7155E7	2.7385E7	2.7461E7													4.5524E6	6.0839E6				1.5736E7	1.4532E7	1.4558E7	8.0585E6	9.2033E6	5	F5:12217	3484_03_r.raw	12	0	0	0	1
1	2	P02452|CO1A1_HUMAN	V.PGPP(+15.99)GAVGPAGK.D	Y	48.78	1019.5399	12	0.8	510.7776	2	20.54	1.1291E7	1.0294E7	9.9779E6	7.2677E6	5.9237E6	6.5215E6	1.1735E7	9.4984E6	9.0616E6	6.7735E6	7.3733E6			8.072E5							6.9405E6	9.2227E6				6.806E6	5.5802E6	5.5148E6			2	F2:6170	3399_02.raw	17	1	1	1	1
1	2	P02452|CO1A1_HUMAN	V.QGPP(+15.99)GPAGEEGK.R	Y	48.63	1138.5254	12	-0.5	570.2697	2	13.95						7.1676E7	7.0487E7	6.7568E7							1.7811E6		1.0181E6														7	F7:3402	3849_02.raw	5	0	0	0	0
1	2	P02452|CO1A1_HUMAN	M.GPP(+15.99)GLAGPP(+15.99)GESGR.E	Y	48.59	1279.6156	14	-1.2	640.8143	2	19.06	1.4651E7	1.7542E7	1.6795E7	1.7377E7	1.9375E7	2.2774E7	2.0103E7		1.1131E7						1.4611E7			1.5219E7	1.8206E7	1.6889E7		1.4203E7				1.5098E7	1.4667E7	1.3953E7	2.2896E7	2.0332E7	29	F29:5365	6474_01.raw	18	1	1	1	1
1	2	P02452|CO1A1_HUMAN	K.DGEAGAQGPPGPAGPAGERGEQGPAGSP(+15.99)GFQGLP(+15.99)GPAGP(+15.99)PGEAGKP(+15.99)GEQGVP(+15.99)GDLGAP(+15.99)GPSGAR.G	Y	48.56	5783.6704	64	1.6	1157.7432	5	36.70		0																				0									22	F22:12230	5289_03_r.raw	0	0	0	0	0
1	2	P02452|CO1A1_HUMAN	R.GEPGP(+15.99)TGLP(+15.99)GPP(+15.99)GER.G	Y	48.44	1464.6843	15	-0.5	489.2351	3	22.13		0								3.0715E7															8.6787E6		3.6549E7				10	F10:6866	4312_02.raw	3	0	0	0	0
1	2	P02452|CO1A1_HUMAN	D.GLNGLP(+15.99)GPIGP(+15.99)P(+15.99)GPR.G	Y	48.35	1445.7626	15	0.3	723.8888	2	33.21	1.1764E7	9.9794E6	1.1533E7	4.4423E7	4.5346E7	9.0708E7	8.6412E7	8.619E7	3.4465E6	3.4397E6	0	0	0	3.8564E6	1.8412E7	1.538E7	1.411E7	9.2891E6	1.0214E7	1.1266E7	9.6183E6	1.3257E7				2.239E8	2.1087E8	2.055E8	1.7692E7	1.9047E7	5	F5:10914	3484_03_r.raw	24	1	1	1	1
1	2	P02452|CO1A1_HUMAN	P.SGPQGPGGP(+15.99)P(+15.99)GPK.G	Y	48.19	1163.5570	13	1.2	582.7865	2	14.02						1.3192E7	1.381E7	1.2278E7																							6	F6:3479	3849_01.raw	3	0	0	0	0
1	2	P02452|CO1A1_HUMAN	K.TGP(+15.99)PGPAGQDGRP(+15.99)GPP(+15.99)GPP(+15.99)GAR.G	Y	48.16	2055.9722	22	-0.2	1028.9932	2	15.66								4.6442E7																				1.8243E7			28	F28:4194	6401_03.raw	2	0	0	0	0
1	2	P02452|CO1A1_HUMAN	R.GP(+15.99)PGP(+15.99)MGPP(+15.99)GLAGPP(+15.99)GESGR.E	Y	48.16	1847.8470	20	2.2	616.9576	3	25.08		2.6901E8				2.1478E8															2.2701E8			4.2529E7			1.7126E8				2	F2:8098	3399_02.raw	5	0	1	0	0
1	2	P02452|CO1A1_HUMAN	K.GDAGPP(+15.99)GPAGPAGP(+15.99)PGPIGNVGAP(+15.99)GAK.G	Y	48.16	2280.1133	27	1.2	761.0460	3	32.34																					1.319E7										21	F21:10439	5289_01.raw	1	0	0	0	0
1	2	P02452|CO1A1_HUMAN	N.AGPP(+15.99)GPP(+15.99)GPAGK.E	Y	48.15	1033.5192	12	-0.7	517.7665	2	14.70				1.2522E6		9.1965E6	1.0865E7	8.195E6	2.0773E6		2.3454E6															1.3215E6	1.7232E6				7	F7:3722	3849_02.raw	8	0	0	0	1
1	2	P02452|CO1A1_HUMAN	D.GLNGLP(+15.99)GPIGPP(+15.99)GPR.G	Y	48.09	1429.7677	15	1.8	715.8924	2	35.34																										6.2578E6	5.7794E6	5.3534E6			27	F27:11613	6401_02.raw	3	0	0	0	0
1	2	P02452|CO1A1_HUMAN	R.GPP(+15.99)GPMGP(+15.99)PGLAGPP(+15.99)GESGR.E	Y	48.08	1831.8522	20	3.2	611.6266	3	27.10							8.9367E7																				9.9498E7				27	F27:8389	6401_02.raw	2	0	0	0	0
1	2	P02452|CO1A1_HUMAN	K.GDAGPPGP(+15.99)AGPAGPP(+15.99)GPIGNVGAP(+15.99)GAK.G	Y	48.06	2280.1133	27	1.3	761.0460	3	31.36	1.4702E9			1.1363E9				7.3969E8	7.8381E8			1.6788E8				9.0469E7		1.684E8	2.0811E8							9.0321E8					8	F8:10230	3849_03.raw	9	1	0	0	1
1	2	P02452|CO1A1_HUMAN	P.MGP(+15.99)P(+15.99)GLAGPP(+15.99)GESGR.E	Y	48.06	1426.6510	15	-0.7	714.3323	2	21.67				2.4582E7	2.2654E7	9.1985E7	9.4389E7	8.8311E7		4.3714E6					6.7767E6		8.1958E6	1.0327E7	1.1246E7	9.1403E6	5.6952E6	9.4231E6				1.9927E7	2.2014E7	1.9714E7	2.0335E7	2.133E7	7	F7:6468	3849_02.raw	18	0	0	0	1
1	2	P02452|CO1A1_HUMAN	G.ANGAP(+15.99)GIAGAP(+15.99)GFP(+15.99)GAR.G	Y	48.02	1527.7429	17	3.4	764.8813	2	28.50				9.169E6	7.9558E6	6.6712E6	6.6109E6	6.7497E6											2.0953E6	2.1987E6									1.6629E6	1.8099E6	4	F4:9165	3484_02.raw	9	0	0	0	1
1	2	P02452|CO1A1_HUMAN	P.AGP(+15.99)PGAP(+15.99)GAPGAP(+15.99)GPVGPAGK.S	Y	48.02	1726.8636	21	2.6	864.4413	2	22.23								1.5745E7																							8	F8:6487	3849_03.raw	1	0	0	0	0
1	2	P02452|CO1A1_HUMAN	R.GP(+15.99)SGPQGP(+15.99)GGPPGP(+15.99)K.G	Y	47.96	1333.6261	15	1.3	667.8212	2	14.52																			4.6164E6	5.3479E6											20	F20:3490	4484_03.raw	2	0	0	0	0
1	2	P02452|CO1A1_HUMAN	R.TGDAGPVGPP(+15.99)GPP(+15.99)GPP(+15.99)GPP(+15.99)GPPSA.G	Y	47.88	2092.9700	24	0.4	1047.4927	2	29.83	7.4194E6	8.1325E6	1.6129E7				2.3404E6	2.8245E6		2.3614E6												6.6935E7									1	F1:9695	3399_01.raw	8	1	1	1	0
1	2	P02452|CO1A1_HUMAN	K.TGPP(+15.99)GPAGQDGR.P	Y	47.84	1124.5210	12	0.6	563.2681	2	13.96	1.1076E6	1.2643E6	1.4001E6	1.3148E6	1.2557E6	3.8803E7	3.8497E7	3.6504E7	0		0															7.3583E5					6	F6:3460	3849_01.raw	9	1	1	1	1
1	2	P02452|CO1A1_HUMAN	P.AGQDGRP(+15.99)GPP(+15.99)GPP(+15.99)GAR.G	Y	47.76	1533.7283	16	1.1	512.2506	3	14.01				3.1859E6	2.8467E6	1.7091E7	1.6208E7	1.7084E7	6.7379E5	5.8919E5								1.586E6	1.8587E6	1.4063E6	7.6067E5	8.8237E5				3.2377E6	3.6196E6	3.5769E6	2.7657E6	2.4939E6	7	F7:3466	3849_02.raw	17	0	0	0	1
1	2	P02452|CO1A1_HUMAN	P.SGPQGPGGPP(+15.99)GP(+15.99)K.G	Y	47.75	1163.5570	13	-0.2	582.7856	2	14.82				4.291E6	3.9962E6	1.0154E7	1.0359E7	9.1538E6														1.4103E6									7	F7:3724	3849_02.raw	6	0	0	0	1
1	2	P02452|CO1A1_HUMAN	R.GP(+15.99)PGPMGPPGLAGPP(+15.99)GESGR.E	Y	47.64	1815.8573	20	0.9	606.2936	3	28.32																					6.771E6	6.217E6						9.7944E6			21	F21:8882	5289_01.raw	3	0	0	0	0
1	2	P02452|CO1A1_HUMAN	S.AGPP(+15.99)GATGFP(+15.99)GAAGR.V	Y	47.58	1314.6316	15	-0.1	658.3230	2	22.31	8.5854E6	6.707E6	7.7469E6	2.0955E7	2.1819E7	1.5942E7	1.476E7	1.602E7	1.4973E7	1.3472E7	1.5708E7			4.5551E5	3.5357E6	3.0032E6	3.2695E6	6.0142E6	5.8745E6	5.1427E6		5.8449E6				8.2116E6	8.1753E6	8.6374E6	0	1.7905E6	5	F5:6782	3484_03_r.raw	23	1	1	1	1
1	2	P02452|CO1A1_HUMAN	R.GEPGPTGLP(+15.99)GP(+15.99)PGER.G	Y	47.55	1448.6895	15	7.5	725.3574	2	25.03													1.5666E6	1.2191E6					5.2855E6												13	F13:7549	4371_02.raw	3	0	0	0	0
1	2	P02452|CO1A1_HUMAN	H.RGFSGLQGPP(+15.99)GPP(+15.99)GSP(+15.99)GEQGPSGASGPAGPR.G	Y	47.43	2860.3486	31	1.0	954.4578	3	29.22	4.5148E6		4.0415E6																												3	F3:9548	3399_03.raw	2	1	0	1	0
1	2	P02452|CO1A1_HUMAN	R.GPSGP(+15.99)QGP(+15.99)GGPP(+15.99)GPK.G	Y	47.37	1333.6261	15	0.6	667.8207	2	13.82															5.207E6																15	F15:3479	4406_01.raw	1	0	0	0	0
1	2	P02452|CO1A1_HUMAN	K.GSP(+15.99)GADGP(+15.99)AGAP(+15.99)GTP(+15.99)GPQGIAGQR.G	Y	47.31	2135.9832	24	1.2	1069.0001	2	20.10	9.5681E6	9.8199E6	7.1936E6								4.473E6												2.4628E6								2	F2:5949	3399_02.raw	7	2	2	1	0
1	2	P02452|CO1A1_HUMAN	R.GEQGPAGSP(+15.99)GFQGLP(+15.99)GP(+15.99)AGPPGEAGKP(+15.99)GEQGVP(+15.99)GDLGAP(+15.99)GPSGAR.G	Y	47.09	4111.9106	45	-1.0	823.3885	5	37.07						1.6234E7																									6	F6:12217	3849_01.raw	1	0	0	0	0
1	2	P02452|CO1A1_HUMAN	R.GFPGLPGPSGEP(+15.99)GK.Q	N	47.06	1311.6459	14	3.5	656.8325	2	37.40	4.7489E6	3.887E6	4.5912E6			4.7229E6	4.8783E6	4.7042E6		5.0092E6												4.4835E6					3.0527E6	4.4404E6			2	F2:12472	3399_02.raw	10	1	1	1	0
1	2	P02452|CO1A1_HUMAN	K.TGPP(+15.99)GPAGQDGRPGP(+15.99)P(+15.99)GPPGAR.G	Y	47.01	2039.9772	22	2.6	681.0014	3	17.90													2.4245E6					4.2524E6					2.2018E6								13	F13:4931	4371_02.raw	3	0	0	0	0
1	2	P02452|CO1A1_HUMAN	N.GAP(+15.99)GIAGAP(+15.99)GFP(+15.99)GAR.G	Y	46.95	1342.6628	15	1.0	672.3394	2	29.58	8.3431E7	7.8526E7	8.2344E7	1.2356E8	1.1942E8	1.0204E8	9.2067E7	9.357E7	1.6563E8	1.6309E8	1.7203E8	1.8674E7	1.8046E7	1.7613E7	3.4159E7	3.0095E7	3.0907E7	2.1008E7	2.4944E7	2.4826E7	4.5532E7	5.9734E7	1.1962E7	1.1034E7	1.156E7	7.938E7	7.295E7	7.5182E7	5.5688E6	6.3682E6	7	F7:9533	3849_02.raw	30	1	1	1	1
1	2	P02452|CO1A1_HUMAN	R.GEP(+15.99)GPP(+15.99)GPAGFAGP(+15.99)P(+15.99)GADGQP(+15.99)GAK.G	Y	46.89	2164.9661	24	2.5	722.6644	3	26.49	5.4391E6	5.7439E7	6.1188E6	1.4983E7	3.9158E6	6.3621E6	9.307E6	7.7494E6	9.0524E6	9.824E6	8.6613E6								1.0018E6	8.5117E5	4.1066E6						4.4595E6	2.3254E6			4	F4:8546	3484_02.raw	17	1	1	1	2
1	2	P02452|CO1A1_HUMAN	R.GEP(+15.99)GPP(+15.99)GP(+15.99)AGFAGPP(+15.99)GADGQP(+15.99)GAK.G	Y	46.79	2164.9661	24	-1.1	722.6619	3	26.37						5.4387E6	4.9014E6		5.8505E6	9.8456E6												2.4853E6				1.2612E6					7	F7:8307	3849_02.raw	7	0	0	0	0
1	2	P02452|CO1A1_HUMAN	E.RGVQGPP(+15.99)GPAGPR.G	Y	46.79	1260.6687	13	-4.2	421.2284	3	15.07	0	0	0	0	0																0						0	0			2	F2:3970	3399_02.raw	0	0	0	0	0
1	2	P02452|CO1A1_HUMAN	K.DGLNGLPGPIGP(+15.99)PGPR.G	Y	46.72	1528.7997	16	5.1	765.4110	2	41.96	2.8482E6		2.9819E6			1.5632E6	1.5203E6	1.2934E6		3.0815E6	3.3332E6										1.2932E6	2.1451E6						1.2546E6			10	F10:14165	4312_02.raw	10	1	0	1	0
1	2	P02452|CO1A1_HUMAN	R.TGDAGPVGPP(+15.99)GPP(+15.99)GPP(+15.99)GPP(+15.99)GPP(+15.99)SAGFDF.S	Y	46.66	2575.1501	28	1.7	859.3921	3	49.26	2.2649E7	2.5451E7							6.7059E6												2.3815E7	3.348E7				9.9636E6					2	F2:16651	3399_02.raw	6	1	1	0	0
1	2	P02452|CO1A1_HUMAN	R.TGDAGPVGP(+15.99)PGP(+15.99)PGPP(+15.99)GPP(+15.99)GPPSAGFDF.S	Y	46.50	2559.1553	28	1.4	1280.5867	2	51.71		1.961E6																				0									22	F22:17432	5289_03_r.raw	1	0	1	0	0
1	2	P02452|CO1A1_HUMAN	V.PGPPGAVGPAGK.D	Y	46.47	1003.5450	12	2.3	502.7809	2	24.05		2.588E6	3.2221E6						1.5749E6												2.3518E6										2	F2:7480	3399_02.raw	4	0	1	1	0
1	2	P02452|CO1A1_HUMAN	K.GEPGP(+15.99)VGVQGPPGPAGEEGK.R	Y	46.39	1830.8748	20	1.5	916.4460	2	25.35			2.1932E7																												3	F3:8209	3399_03.raw	1	0	0	1	0
1	2	P02452|CO1A1_HUMAN	P.AGPP(+15.99)GFPGAVGAK.G	Y	46.37	1140.5927	13	1.7	571.3046	2	30.51						1.5715E7	1.5009E7	1.5015E7																							7	F7:9786	3849_02.raw	3	0	0	0	0
1	2	P02452|CO1A1_HUMAN	K.P(+15.99)GEQGVPGDLGAPGP(+15.99)SGAR.G	Y	46.36	1749.8281	19	0.6	875.9219	2	26.11																										2.2531E7					26	F26:8315	6401_01.raw	1	0	0	0	0
1	2	P02452|CO1A1_HUMAN	R.GLP(+15.99)GPP(+15.99)GAP(+15.99)GPQGF.Q	Y	46.34	1295.6145	14	1.8	648.8157	2	37.78	5.1059E6	4.7657E6	4.5043E6	8.2676E6	8.0788E6	2.0448E7	2.0608E7	2.1639E7	1.4174E7	1.4576E7	1.4493E7											3.8134E6				7.3086E6	8.0642E6	7.4163E6			8	F8:12336	3849_03.raw	15	1	1	1	1
1	2	P02452|CO1A1_HUMAN	R.GNDGATGAAGP(+15.99)PGPTGPAGPP(+15.99)GFPGAVGAK.G	Y	46.25	2531.2039	30	-2.5	844.7397	3	37.24												4.624E6																			12	F12:12110	4371_01.raw	1	0	0	0	0
1	2	P02452|CO1A1_HUMAN	R.GPAGPQGPRGDKGETGEQGDR.G	Y	46.10	2064.9573	21	2.8	517.2480	4	13.36	5.3497E5	7.7663E5	0			5.0083E5			4.7567E5	5.1463E5													1.0239E6		7.8612E5		0	0			1	F1:3353	3399_01.raw	7	1	1	0	0
1	2	P02452|CO1A1_HUMAN	K.GSP(+15.99)GADGPAGAP(+15.99)GTP(+15.99)GPQGI.A	Y	46.07	1707.7699	20	2.0	854.8939	2	29.01						1.0179E8	8.865E7	8.0699E7																							7	F7:9390	3849_02.raw	3	0	0	0	0
1	2	P02452|CO1A1_HUMAN	R.GNDGATGAAGP(+15.99)PGPTGPAGPP(+15.99)GFP(+15.99)GAVGAK.G	Y	46.04	2547.1987	30	1.3	850.0746	3	32.96																														1.1498E7	30	F30:10455	6474_02.raw	1	0	0	0	0
1	2	P02452|CO1A1_HUMAN	K.DGLN(+.98)GLPGPIGP(+15.99)PGP(+15.99)R.G	Y	45.88	1545.7786	16	2.4	773.8984	2	40.28																					1.0715E7										21	F21:13130	5289_01.raw	1	0	0	0	0
1	2	P02452|CO1A1_HUMAN	R.GEP(+15.99)GPTGLP(+15.99)GP(+15.99)P(+15.99)GER.G	Y	45.80	1480.6793	15	1.8	741.3483	2	18.93																													0		29	F29:5314	6474_01.raw	0	0	0	0	0
1	2	P02452|CO1A1_HUMAN	R.GVPGP(+15.99)P(+15.99)GAVGPAGK.D	Y	45.72	1191.6248	14	1.4	398.2161	3	19.71	1.1243E7						5.0062E6																								7	F7:5687	3849_02.raw	2	1	0	0	0
1	2	P02452|CO1A1_HUMAN	R.GPAGPQGPR.G	Y	45.67	835.4300	9	1.8	418.7230	2	13.72	1.6114E7	1.5106E7	2.014E7	6.5463E6	4.4698E6	4.8111E6	9.2167E6	8.4449E6	8.7147E6	9.5997E6	8.5591E6		2.2413E6	1.5882E6		4.6275E5	4.0777E5	0	9.2998E5	0	7.2899E6	1.0033E7	1.1599E6	9.1278E5	1.2035E6	5.0284E6	9.3616E6	7.896E6			7	F7:3321	3849_02.raw	24	1	1	1	1
1	2	P02452|CO1A1_HUMAN	R.TGDAGPVGPP(+15.99)GPP(+15.99)GPP(+15.99)GPP(+15.99)GPP(+15.99)SA.G	Y	45.67	2108.9648	24	0.2	1055.4899	2	27.73	1.0076E7	1.4201E7	1.2137E7																			1.5611E7				0		6.3176E6			26	F26:8758	6401_01.raw	5	1	1	1	0
1	2	P02452|CO1A1_HUMAN	G.FP(+15.99)GLP(+15.99)GPSGEP(+15.99)GK.Q	N	45.65	1286.6141	13	-1.2	644.3136	2	31.19	3.8304E6		7.7494E6	3.8925E7	3.6286E7	0	2.3507E7	2.7227E7	1.6315E7									1.4325E7	0	0						1.4157E7				6.2272E6	7	F7:10004	3849_02.raw	10	1	0	1	1
1	2	P02452|CO1A1_HUMAN	D.GLNGLP(+15.99)GPIGP(+15.99)PGP(+15.99)R.G	Y	45.62	1445.7626	15	1.7	723.8898	2	34.69		9.9794E6			4.5346E7		8.6412E7								1.8412E7				1.0214E7	1.1266E7	9.6183E6		0	0	2.6482E6		2.1087E8	2.055E8			7	F7:11470	3849_02.raw	10	0	1	0	0
1	2	P02452|CO1A1_HUMAN	R.GETGPAGRP(+15.99)GEVGPP(+15.99)GPP(+15.99)GPAGEKG.S	Y	45.59	2272.0718	25	2.8	758.3666	3	18.38	3.6624E8	3.4714E8	3.6717E8									4.5644E7		3.917E7							1.5448E8	2.264E8	6.9606E7	6.294E7	6.1942E7		1.4544E8	1.4163E8			23	F23:5266	6313_01.raw	12	1	1	1	0
1	2	P02452|CO1A1_HUMAN	G.SAGPP(+15.99)GATGFP(+15.99)GAAGR.V	Y	45.53	1401.6636	16	2.6	701.8409	2	23.91					0	2.3397E7		0										9.9848E6		9.7125E6											8	F8:7301	3849_03.raw	3	0	0	0	0
1	2	P02452|CO1A1_HUMAN	V.P(+15.99)GPP(+15.99)GAVGPAGK.D	Y	45.35	1035.5348	12	-0.3	518.7745	2	19.66	7.9108E7	7.6095E7	7.2949E7	5.1968E7	5.1547E7	6.6615E7	8.8865E7	8.5038E7													6.4856E7	6.1276E7				4.3194E7	3.746E7	3.7517E7			7	F7:5732	3849_02.raw	17	2	1	1	1
1	2	P02452|CO1A1_HUMAN	R.GFSGLDGAK.G	Y	45.33	850.4185	9	1.5	426.2172	2	23.82	1.0468E9	1.0064E9	1.1518E9	7.3269E8	8.0543E8	8.2626E8	7.4582E8	7.8079E8	8.0169E8	8.2183E8	8.4456E8	1.3281E8	1.2141E8	1.0886E8	1.2963E8	1.1762E8	1.1311E8	1.2371E8	1.3327E8	1.2798E8	8.4862E8	1.1503E9	9.3888E7	8.3101E7	7.9752E7	6.1179E8	6.086E8	5.8877E8	3.0709E7	3.1765E7	11	F11:7449	4312_03.raw	48	1	1	2	2
1	2	P02452|CO1A1_HUMAN	R.GNDGATGAAGP(+15.99)PGPTGPAGP(+15.99)PGFP(+15.99)GAVGAK.G	Y	45.30	2547.1987	30	1.7	850.0750	3	35.80	4.4234E7	0					1.9047E7																								2	F2:11889	3399_02.raw	2	1	0	0	0
1	2	P02452|CO1A1_HUMAN	R.GEPGP(+15.99)P(+15.99)GPAGAAGP(+15.99)AGNP(+15.99)GADGQP(+15.99)GAK.G	Y	45.27	2331.0361	27	1.4	778.0204	3	16.08					3.2587E7																					3.2099E7					5	F5:4435	3484_03_r.raw	2	0	0	0	0
1	2	P02452|CO1A1_HUMAN	P.AGP(+15.99)PGAP(+15.99)GAP(+15.99)GAP(+15.99)GPVGPAGK.S	Y	45.09	1742.8586	21	4.2	872.4402	2	18.72					5.2579E6	1.249E7																									5	F5:5447	3484_03_r.raw	2	0	0	0	0
1	2	P02452|CO1A1_HUMAN	F.P(+15.99)GADGVAGPK.G	Y	45.08	883.4399	10	1.0	442.7277	2	24.73	1.1213E8	1.0642E8	1.131E8	8.9461E7	1.0309E8	6.6373E7	8.6253E7	7.7492E7	1.1441E8	1.1901E8	1.1359E8	1.4443E7	1.9573E7	1.6905E7	1.4029E7	1.4003E7	1.1787E7	1.1641E7	4.1289E7	4.7431E7	1.3254E8	1.5818E8	1.1873E7	1.165E7	9.005E6	6.6531E7	6.3218E7	5.8592E7			24	F24:7358	6313_02.raw	35	1	1	1	1
1	2	P02452|CO1A1_HUMAN	V.RGEP(+15.99)GPP(+15.99)GPAGAAGP(+15.99)AGNP(+15.99)GADGQP(+15.99)GAK.G	Y	45.06	2487.1372	28	1.9	830.0546	3	15.45						0																									6	F6:4022	3849_01.raw	0	0	0	0	0
1	2	P02452|CO1A1_HUMAN	K.TGPP(+15.99)GP(+15.99)AGQDGRPGP(+15.99)P(+15.99)GP(+15.99)PGAR.G	Y	44.99	2071.9670	22	1.8	691.6642	3	15.10																														1.3502E7	30	F30:3811	6474_02.raw	1	0	0	0	0
1	2	P02452|CO1A1_HUMAN	R.GPP(+15.99)GSAGAPGKDGLNGLP(+15.99)GPIGP(+15.99)P(+15.99)GPR.G	Y	44.91	2453.2297	27	2.9	818.7529	3	32.37	1.377E6																														1	F1:10682	3399_01.raw	1	1	0	0	0
1	2	P02452|CO1A1_HUMAN	K.NGDDGEAGKP(+15.99)GRP(+15.99)GERGP(+15.99)PGPQGAR.G	Y	44.83	2476.1438	25	1.1	620.0439	4	13.01		1.6564E7		2.337E6				7.4527E6		2.9372E6											0		4.8373E6		3.7387E6		5.756E6				23	F23:3206	6313_01.raw	7	0	1	0	1
1	2	P02452|CO1A1_HUMAN	R.VGPPGP(+15.99)SGNAGPP(+15.99)GPP(+15.99)GPAGK.E	Y	44.80	1811.8801	21	-0.1	604.9673	3	19.54					4.1982E8															7.765E7						3.6024E8					26	F26:5655	6401_01.raw	3	0	0	0	0
1	2	P02452|CO1A1_HUMAN	K.QGPSGASGERGP(+15.99)P(+15.99)GPMGPPGLAGP(+15.99)PGESGR.E	Y	44.63	2758.2727	30	9.0	920.4398	3	25.91			4.0437E6																												3	F3:8398	3399_03.raw	1	0	0	1	0
1	2	P02452|CO1A1_HUMAN	K.DGLNGLPGP(+15.99)IGPP(+15.99)GPR.G	Y	44.63	1544.7946	16	1.2	773.4055	2	39.08								3.2836E7																							8	F8:13019	3849_03.raw	1	0	0	0	0
1	2	P02452|CO1A1_HUMAN	R.GLTGPIGPP(+15.99)GP(+15.99)AGAP(+15.99)GDK.G	Y	44.60	1605.7997	18	2.2	803.9089	2	30.33	2.847E7		1.9809E7	5.3287E7	4.1393E7	2.5389E7	2.7075E7	2.5628E7	4.3639E7	4.4809E7	4.5066E7				5.0438E6	5.9146E6	5.038E6	4.9497E6	5.2217E6	5.6804E6	1.0214E7					2.0592E7		1.7979E7			7	F7:9685	3849_02.raw	19	1	0	1	1
1	2	P02452|CO1A1_HUMAN	R.GPP(+15.99)GP(+15.99)MGPP(+15.99)GLAGP(+15.99)P(+15.99)GESGR.E	Y	44.60	1863.8419	20	5.6	932.9335	2	24.38								2.0689E6																							8	F8:7476	3849_03.raw	1	0	0	0	0
1	2	P02452|CO1A1_HUMAN	R.GPAGPQGP(+15.99)RGDKGETGEQGDRG.I	Y	44.57	2137.9736	22	0.1	535.5007	4	13.35	1.624E6	1.6868E6	1.278E6																				1.3421E6	8.9042E5							24	F24:3265	6313_02.raw	5	1	1	1	0
1	2	P02452|CO1A1_HUMAN	A.NGAP(+15.99)GIAGAP(+15.99)GFP(+15.99)GAR.G	Y	44.56	1456.7058	16	1.9	729.3616	2	28.50		3.2727E6	3.4004E6	1.9267E7	2.1281E7	1.7893E7			6.9553E6	7.5763E6	8.0284E6				3.8053E6			3.3288E6		3.4737E6						8.4757E6	8.2126E6	1.0249E7	2.0445E6	2.0135E6	4	F4:9130	3484_02.raw	16	0	1	1	1
1	2	P02452|CO1A1_HUMAN	G.FPGLP(+15.99)GPSGEPGK.Q	N	44.51	1254.6244	13	1.3	628.3203	2	35.44				6.509E6	5.9618E6	5.5138E6	5.1546E6	5.4757E6	2.7015E6		2.9684E6																	2.1694E6			7	F7:11599	3849_02.raw	8	0	0	0	1
1	2	P02452|CO1A1_HUMAN	K.GSPGADGPAGAP(+15.99)GTP(+15.99)GPQGI.A	Y	44.49	1691.7750	20	2.0	846.8965	2	30.16						1.6633E7	1.3605E7	1.4387E7																							7	F7:9706	3849_02.raw	3	0	0	0	0
1	2	P02452|CO1A1_HUMAN	K.GDAGP(+15.99)PGPAGPAGPP(+15.99)GPIGNVGAP(+15.99)GAK.G	Y	44.45	2280.1133	27	1.5	761.0461	3	31.95								6.6695E6		1.4684E7			1.5022E8				9.7925E7			1.8199E8	0		1.238E6								21	F21:10201	5289_01.raw	6	0	0	0	0
1	2	P02452|CO1A1_HUMAN	R.GFP(+15.99)GLP(+15.99)GP(+15.99)SGEP(+15.99)GK.Q	N	44.44	1359.6305	14	-6.2	680.8183	2	27.91	3.417E6																					7.3011E6									22	F22:9144	5289_03_r.raw	3	1	0	0	0
1	2	P02452|CO1A1_HUMAN	R.GLP(+15.99)GPP(+15.99)GAPGP(+15.99)QGFQGPPGEP(+15.99)GEP(+15.99)GASGP(+15.99)MGPR.G	Y	44.42	3099.3989	33	2.3	775.8588	4	33.77	1.269E7										6.2252E6											1.1919E7									22	F22:11161	5289_03_r.raw	3	1	0	0	0
1	2	P02452|CO1A1_HUMAN	A.GAP(+15.99)GTPGPQGIAGQR.G	Y	44.37	1378.6953	15	2.6	690.3568	2	20.11	0	0	0	0	0				0	0	0								0							0		0			5	F5:5921	3484_03_r.raw	0	0	0	0	0
1	2	P02452|CO1A1_HUMAN	K.DGLN(+.98)GLPGPIGP(+15.99)P(+15.99)GPR.G	Y	44.28	1545.7786	16	7.7	773.9025	2	40.09																						1.0564E6						1.3264E6			28	F28:13248	6401_03.raw	2	0	0	0	0
1	2	P02452|CO1A1_HUMAN	R.P(+15.99)GEVGPP(+15.99)GPP(+15.99)GP(+15.99)AGEK.G	Y	44.22	1505.6997	16	-0.1	753.8571	2	17.39	1.4848E7	1.3881E7	1.5931E7	3.2366E7	3.1833E7	2.5835E7	2.7583E7	3.5031E7	2.6205E7	2.5376E7	2.7612E7			3.0072E6	6.0598E6	5.7881E6	8.765E6	6.1118E6	5.519E6	5.8754E6	7.2706E6	1.013E7		7.969E5		2.1361E7	1.5649E7	1.9624E7		5.6417E5	26	F26:4820	6401_01.raw	25	1	1	1	1
1	2	P02452|CO1A1_HUMAN	R.GVVGLP(+15.99)GQR.G	Y	44.12	897.5032	9	-0.4	449.7587	2	22.30	2.5322E9	2.3794E9	2.6976E9	1.5456E9	1.7101E9	1.7947E9	1.48E9	1.4462E9	1.3971E9	1.442E9	1.5274E9	2.8901E8	2.7441E8	2.4411E8	2.2913E8	1.8858E8	1.7162E8	2.9457E8	2.9122E8	2.9035E8	1.7388E9	2.4249E9	2.8022E8	2.6188E8	2.6314E8	1.3177E9	1.3694E9	1.3094E9	7.0481E7	7.3078E7	24	F24:6387	6313_02.raw	36	1	1	1	2
1	2	P02452|CO1A1_HUMAN	G.FPGLP(+15.99)GPSGEP(+15.99)GK.Q	N	43.92	1270.6193	13	2.2	636.3183	2	33.03				4.2525E7		2.6824E7	2.5031E7	2.3107E7																		1.0788E7	1.0646E7	9.7532E6			8	F8:10921	3849_03.raw	7	0	0	0	1
1	2	P02452|CO1A1_HUMAN	K.QGPSGASGER.G	Y	43.75	944.4312	10	0.9	473.2233	2	14.09	2.0666E6	2.2429E6	2.4159E6	2.8955E6	1.9781E6	2.8302E6	5.0719E6	3.7767E6	3.0053E6	3.3928E6	3.3758E6			9.5605E5				1.8932E6	1.7584E6	2.2443E6	1.7059E6	1.8927E6				2.5457E6	1.9775E6				20	F20:3480	4484_03.raw	19	1	1	1	1
1	2	P02452|CO1A1_HUMAN	K.DGEAGAQGPPGPAGPAGERGEQGPAGSP(+15.99)GFQGLP(+15.99)GPAGPP(+15.99)GEAGKP(+15.99)GEQGVPGDLGAP(+15.99)GPSGAR.G	Y	43.64	5767.6758	64	-0.5	1154.5419	5	38.49		0																													2	F2:12856	3399_02.raw	0	0	0	0	0
1	2	P02452|CO1A1_HUMAN	Q.AGVM(+15.99)GFP(+15.99)GPK.G	Y	43.62	991.4797	10	-4.6	496.7448	2	24.83	5.3681E6	4.7048E6	4.8114E6	9.56E6	9.3651E6	7.457E6	7.7629E6	8.0431E6		8.1782E6	1.0455E7											0					4.2918E6				7	F7:7700	3849_02.raw	11	1	1	1	1
1	2	P02452|CO1A1_HUMAN	R.GNDGATGAAGPP(+15.99)GPTGPAGPP(+15.99)GFP(+15.99)GAV.G	Y	43.61	2291.0454	27	5.4	1146.5361	2	41.14						4.7309E6	4.2754E6	3.8863E6																							7	F7:13635	3849_02.raw	3	0	0	0	0
1	2	P02452|CO1A1_HUMAN	K.DGLN(+.98)GLPGP(+15.99)IGPP(+15.99)GPR.G	Y	43.58	1545.7786	16	7.2	773.9022	2	40.29																											0				27	F27:13358	6401_02.raw	0	0	0	0	0
1	2	P02452|CO1A1_HUMAN	R.VGP(+15.99)PGP(+15.99)SGNAGPP(+15.99)GP(+15.99)P(+15.99)GPAGK.E	Y	43.51	1843.8699	21	1.4	922.9435	2	17.23															9.6597E6																15	F15:4600	4406_01.raw	1	0	0	0	0
1	2	P02452|CO1A1_HUMAN	R.GPP(+15.99)GP(+15.99)MGP(+15.99)P(+15.99)GLAGPP(+15.99)GESGR.E	Y	43.48	1863.8419	20	-5.0	622.2848	3	25.78										6.9713E6				0	3.3456E6																14	F14:7792	4371_03.raw	2	0	0	0	0
1	2	P02452|CO1A1_HUMAN	G.FP(+15.99)GADGVAGPK.G	Y	43.47	1030.5083	11	-2.6	516.2601	2	24.08	4.2638E7	4.8519E7	5.7194E7	2.3641E8	2.4103E8	1.3946E8	1.3551E8	1.2296E8	9.1722E7	9.0016E7	1.0522E8		0		9.3855E7	0	6.9322E7	6.553E7	6.8979E7	7.0969E7	3.2586E7	4.4126E7	3.0457E7	2.2334E7	1.7385E7	7.1375E7	7.4243E7	7.0126E7	5.3333E7	5.5801E7	7	F7:7393	3849_02.raw	27	1	1	2	1
1	2	P02452|CO1A1_HUMAN	G.VQGPP(+15.99)GPAGEEGK.R	Y	43.43	1237.5938	13	-0.1	619.8041	2	15.71															1.4953E7	1.3904E7	1.4274E7									2.6782E7	2.8195E7	2.8577E7			16	F16:4146	4406_02.raw	6	0	0	0	0
1	2	P02452|CO1A1_HUMAN	R.GP(+15.99)P(+15.99)GPMGPPGLAGPPGESGR.E	Y	43.29	1815.8573	20	3.1	606.2949	3	29.22					2.3244E7																2.0848E7					9.0109E6	8.9684E6	7.6281E6			28	F28:9330	6401_03.raw	5	0	0	0	0
1	2	P02452|CO1A1_HUMAN	G.FSGLQGPPGPPGS(+203.08)PGEQGPSGASGPAGPR.G	Y	43.10	2802.3208	29	-6.4	935.1082	3	39.48		2.5277E7			1.1237E7			6.5981E6		3.2672E7	3.1696E7															3.859E6					26	F26:13150	6401_01.raw	6	0	1	0	0
1	2	P02452|CO1A1_HUMAN	R.GLTGPIGPP(+15.99)GPAGAPGDKG.E	Y	43.07	1630.8314	19	2.0	816.4246	2	30.97	2.4663E7	2.2689E7	2.396E7																												2	F2:10026	3399_02.raw	3	1	1	1	0
1	2	P02452|CO1A1_HUMAN	D.GLNGLP(+15.99)GPIGP(+15.99)PGPR.G	Y	43.02	1429.7677	15	1.8	715.8924	2	35.34																										6.2578E6	5.7794E6	5.3534E6			27	F27:11508	6401_02.raw	3	0	0	0	0
1	2	P02452|CO1A1_HUMAN	R.GETGPAGRP(+15.99)GEVGPP(+15.99)GPP(+15.99)GP(+15.99)AGEKGSP(+15.99)GADGPAGAP(+15.99)GTP(+15.99)GPQGIAGQR.G	Y	42.99	4333.0229	48	1.5	1084.2646	4	25.21																					3.3849E6										21	F21:7751	5289_01.raw	1	0	0	0	0
1	2	P02452|CO1A1_HUMAN	K.DGLNGLPGPIGPP(+15.99)GPR.G	Y	42.97	1528.7997	16	3.0	765.4094	2	41.82	2.8482E6	2.3238E6						1.2934E6	2.8308E6		3.3332E6															2.3201E6					2	F2:14015	3399_02.raw	6	1	1	0	0
1	2	P02452|CO1A1_HUMAN	R.GAP(+15.99)GDRGEP(+15.99)GPP(+15.99)GPAGFAGP(+15.99)P(+15.99)GADGQP(+15.99)GAK.G	Y	42.97	2734.2217	30	1.6	912.4160	3	21.96	1.8474E7	2.3189E7	1.4087E7																												2	F2:6751	3399_02.raw	4	1	2	1	0
1	2	P02452|CO1A1_HUMAN	R.GEQGP(+15.99)AGSPGFQGLPGP(+15.99)AGP(+15.99)P(+15.99)GEAGKPGEQGVPGDLGAPGP(+15.99)SGAR.G	Y	42.97	4095.9155	45	-7.0	1024.9790	4	38.58																							0								23	F23:12522	6313_01.raw	0	0	0	0	0
1	2	P02452|CO1A1_HUMAN	R.P(+15.99)GEVGPP(+15.99)GP(+15.99)P(+15.99)GP(+15.99)AGEK.G	Y	42.86	1521.6946	16	0.2	761.8547	2	16.23				2.0989E6	2.0285E6	6.058E6	5.8602E6	5.1554E6	3.3547E6	3.7053E6	4.7932E6								1.1006E6		3.2031E5	5.9037E5				1.6242E6	1.1023E6	8.507E5			7	F7:4280	3849_02.raw	14	0	0	0	1
1	2	P02452|CO1A1_HUMAN	K.GDAGPP(+15.99)GPAGPAGPP(+15.99)GPIGNVGAPGAK.G	Y	42.64	2264.1184	27	2.2	755.7151	3	32.80																										3.2913E7					26	F26:10501	6401_01.raw	1	0	0	0	0
1	2	P02452|CO1A1_HUMAN	A.GFAGPP(+15.99)GADGQP(+15.99)GAK.G	N	42.57	1357.6261	15	2.5	679.8220	2	18.29															4.0637E6	3.599E6	3.2897E6														16	F16:5076	4406_02.raw	3	0	0	0	0
1	2	P02452|CO1A1_HUMAN	G.SPGADGPAGAPGT(+203.08)P(+15.99)GPQGIAGQR.G	Y	42.55	2234.0564	23	-9.2	745.6859	3	25.94		7.4564E7			2.4299E7	2.0188E7		1.6325E7			4.9983E7	1.1873E7	1.5092E7											2.2905E7	2.6336E7	1.6204E7	1.6688E7				25	F25:7965	6313_03.raw	14	0	2	0	0
1	2	P02452|CO1A1_HUMAN	G.SPGADGPAGAPGT(+203.08)PGPQGIAGQR.G	Y	42.55	2218.0613	23	-9.5	740.3540	3	28.10			8.8721E7	5.5466E6	3.2891E7					6.9753E7		2.1309E6		2.6268E6								3.0688E7	2.7574E6	2.1412E6							5	F5:9027	3484_03_r.raw	9	0	0	1	1
1	2	P02452|CO1A1_HUMAN	G.EP(+15.99)GPTGLP(+15.99)GPP(+15.99)GER.G	Y	42.48	1407.6630	14	-4.2	704.8358	2	23.27						1.2403E7	1.1823E7	1.1315E7													1.6609E6					9.2689E6					7	F7:7083	3849_02.raw	5	0	0	0	0
1	2	P02452|CO1A1_HUMAN	Q.GP(+15.99)P(+15.99)GP(+15.99)AGEEGKRGARGEP(+15.99)GPTGLP(+15.99)GP(+15.99)PGER.G	Y	42.44	2929.3911	30	-7.0	977.4642	3	21.91		9.4114E6					5.5364E6																								2	F2:6748	3399_02.raw	2	0	1	0	0
1	2	P02452|CO1A1_HUMAN	K.GEAGPQGPR.G	Y	42.41	867.4199	9	0.4	434.7174	2	13.29	2.1812E6	2.9708E6	3.0198E6	1.3436E6	1.4156E6	2.1219E6	3.8541E6	4.1091E6	1.2311E6	1.5378E6	1.1675E6										1.342E6	1.3423E6	2.0198E5	2.5365E5		1.0414E6	1.4098E6	1.3008E6			8	F8:3245	3849_03.raw	21	1	2	2	1
1	2	P02452|CO1A1_HUMAN	A.RGSAGPP(+15.99)GATGFP(+15.99)GAAGR.V	Y	42.22	1614.7861	18	-1.6	539.2684	3	19.25	1.7934E7	1.6813E7	1.6921E7		9.0281E6	1.5201E7															1.0289E7	1.5304E7				9.688E6	9.0712E6				3	F3:5741	3399_03.raw	9	1	1	1	0
1	2	P02452|CO1A1_HUMAN	K.GSPGEAGRP(+15.99)GEAGLP(+15.99)GAK.G	Y	42.20	1638.7960	18	-0.8	547.2722	3	15.72	1.4504E7	1.2693E7	1.278E7																		5.7579E6	7.5223E6									2	F2:4204	3399_02.raw	5	1	1	1	0
1	2	P02452|CO1A1_HUMAN	Q.GP(+15.99)P(+15.99)GP(+15.99)AGEEGKRGARGEP(+15.99)GPTGLP(+15.99)GPP(+15.99)GER.G	Y	42.13	2929.3911	30	-7.0	977.4642	3	21.91		9.4114E6	9.5763E6			6.7008E6		5.3453E6																							2	F2:6646	3399_02.raw	4	0	1	1	0
1	2	P02452|CO1A1_HUMAN	G.ISVPGP(+15.99)MGPSGPR.G	Y	42.09	1266.6390	13	0.6	634.3271	2	27.16	2.25E7	2.1344E7	2.2019E7	9.0319E6	9.4139E6	8.5738E6	7.1767E6	7.9718E6	7.9244E6	8.6571E6	7.2822E6										1.6313E7	2.1827E7				9.562E6	8.6187E6	7.81E6			21	F21:8476	5289_01.raw	16	1	1	1	1
1	2	P02452|CO1A1_HUMAN	R.GEPGP(+15.99)P(+15.99)GPAGAAGPAGNP(+15.99)GADGQP(+15.99)GAK.G	Y	42.04	2315.0413	27	-0.2	772.6876	3	18.86									0																						9	F9:5445	4312_01.raw	0	0	0	0	0
1	2	P02452|CO1A1_HUMAN	E.TGPAGP(+15.99)PGAP(+15.99)GAP(+15.99)GAP(+15.99)GPVGPAGK.S	Y	41.99	1997.9805	24	-1.7	666.9996	3	21.05							6.6054E6							0						9.5779E5			1.416E6								23	F23:6185	6313_01.raw	3	0	0	0	0
1	2	P02452|CO1A1_HUMAN	R.GNDGATGAAGPP(+15.99)GPTGPAGP(+15.99)P(+15.99)GFPGAVGAK.G	Y	41.96	2547.1987	30	-1.1	850.0726	3	35.49																												2.5681E7			28	F28:11746	6401_03.raw	1	0	0	0	0
1	2	P02452|CO1A1_HUMAN	R.GAP(+15.99)GDRGEP(+15.99)GPP(+15.99)GPAG.F	Y	41.89	1435.6327	16	-1.7	718.8224	2	14.92						3.4843E6	4.2734E6	4.0094E6																		2.1906E6	2.5098E6	2.2328E6			7	F7:3793	3849_02.raw	6	0	0	0	0
1	2	P02452|CO1A1_HUMAN	R.GEQGPAGSP(+15.99)GFQGLP(+15.99)GPAGPP(+15.99)GEAGKP(+15.99)GEQGVP(+15.99)GDLGAP(+15.99)GPSGARG.E	Y	41.82	4168.9321	46	0.5	1390.6520	3	35.60	4.9078E7	1.9227E8	2.0728E8																				3.5539E7	2.9436E7	3.6778E7						2	F2:11746	3399_02.raw	8	1	2	2	0
1	2	P02452|CO1A1_HUMAN	G.EP(+15.99)GPTGLP(+15.99)GP(+15.99)PGER.G	Y	41.71	1407.6630	14	0.8	704.8394	2	22.00				1.2509E7	1.2533E7																										4	F4:6603	3484_02.raw	2	0	0	0	1
1	2	P02452|CO1A1_HUMAN	R.GETGP(+15.99)AGRPGEVGPP(+15.99)GP(+15.99)P(+15.99)GP(+15.99)AGEK.G	Y	41.57	2247.0403	24	1.4	750.0217	3	16.61								5.104E7																			2.8254E7		5.9892E6		27	F27:4449	6401_02.raw	3	0	0	0	0
1	2	P02452|CO1A1_HUMAN	A.GAQGPP(+15.99)GPAGPAGER.G	Y	41.52	1333.6375	15	-0.8	667.8255	2	15.48				4.5382E6	0		6.3608E6																								5	F5:4097	3484_03_r.raw	2	0	0	0	1
1	2	P02452|CO1A1_HUMAN	R.TGDAGPVGPP(+15.99)GPP(+15.99)GPP(+15.99)GPP(+15.99)GPPSAG.F	Y	41.37	2149.9915	25	2.2	1076.0054	2	28.91	8.7218E6		9.4483E6																			8.4936E6									22	F22:9269	5289_03_r.raw	3	1	0	1	0
1	2	P02452|CO1A1_HUMAN	S.P(+15.99)GEQGPSGASGPAGPR.G	Y	41.35	1436.6643	16	4.8	719.3429	2	32.16				6.1432E6	5.5116E6				5.0798E6		7.1907E6										8.0208E6	1.161E7									11	F11:10744	4312_03.raw	6	0	0	0	1
1	2	P02452|CO1A1_HUMAN	R.GETGPAGRP(+15.99)GEVGPP(+15.99)GPP(+15.99)GP(+15.99)AGEKG.S	Y	41.26	2288.0667	25	0.1	763.6962	3	17.97	5.7776E7	5.7578E7	5.8178E7																					1.0907E7							1	F1:5261	3399_01.raw	4	1	1	1	0
1	2	P02452|CO1A1_HUMAN	R.TGDAGPVGP(+15.99)PGP(+15.99)PGP(+15.99)PGPP(+15.99)GP(+15.99)PSAGFDF.S	Y	41.04	2575.1501	28	1.0	859.3915	3	49.48																						3.348E7									22	F22:16643	5289_03_r.raw	1	0	0	0	0
1	2	P02452|CO1A1_HUMAN	R.GETGPAGRP(+15.99)GEVGPP(+15.99)GP(+15.99)P(+15.99)GP.A	Y	41.02	1845.8491	20	1.3	923.9330	2	20.79							1.1967E6																								7	F7:6169	3849_02.raw	1	0	0	0	0
1	2	P02452|CO1A1_HUMAN	R.GFSGLQGP(+15.99)P(+15.99)GP(+15.99)P(+15.99)GSPGEQGPSGASGPAGPR.G	Y	40.94	2720.2424	30	3.6	907.7581	3	31.97		5.0592E7			6.9564E7	6.2641E7			5.5473E7			0		0					1.5492E7						1.4002E7						14	F14:10011	4371_03.raw	6	0	1	0	0
1	2	P02452|CO1A1_HUMAN	G.FS(+203.08)GLQGPPGPPGSPGEQGPSGASGPAGPR.G	Y	40.92	2802.3208	29	-9.5	935.1053	3	39.27		2.5277E7	2.8219E7			6.8891E6	0		3.2727E7	3.2672E7	3.1696E7																				11	F11:13461	4312_03.raw	6	0	1	1	0
1	2	P02452|CO1A1_HUMAN	R.TGDAGPVGPP(+15.99)GP(+15.99)PGP(+15.99)PGPP(+15.99)GPPSAGFDF.S	Y	40.90	2559.1553	28	0.6	854.0596	3	52.65		5.2902E7				1.6498E7	1.5046E7	1.0419E7			1.9646E7											5.2576E7									7	F7:17295	3849_02.raw	6	0	1	0	0
1	2	P02452|CO1A1_HUMAN	R.TGDAGPVGPP(+15.99)GP(+15.99)PGPP(+15.99)GPPGPPSAGFDF.S	Y	40.85	2543.1604	28	3.8	848.7306	3	51.09	8.2253E6																				7.057E6	4.4431E6									22	F22:17294	5289_03_r.raw	3	1	0	0	0
1	2	P02452|CO1A1_HUMAN	P.AGRP(+15.99)GEVGPP(+15.99)GPP(+15.99)GPAGEK.G	Y	40.81	1773.8644	19	-0.3	592.2952	3	16.80						1.383E7	1.2988E7	1.3885E7																							8	F8:4554	3849_03.raw	3	0	0	0	0
1	2	P02452|CO1A1_HUMAN	R.GEPGPP(+15.99)GP(+15.99)AGAAGP(+15.99)AGNP(+15.99)GADGQP(+15.99)GAK.G	Y	40.75	2331.0361	27	1.4	778.0204	3	16.08					3.2587E7																										5	F5:4227	3484_03_r.raw	1	0	0	0	0
1	2	P02452|CO1A1_HUMAN	R.GETGPAGP(+15.99)PGAPGAP(+15.99)GAPGPVGPAGK.S	Y	40.74	2152.0547	26	2.6	718.3607	3	25.95		4.9396E7																													2	F2:8368	3399_02.raw	1	0	1	0	0
1	2	P02452|CO1A1_HUMAN	R.GSEGPQGVRGEP(+15.99)GP(+15.99)PGPAGAAGP(+15.99)AGNP(+15.99)GADGQP(+15.99)GAK.G	Y	40.64	3198.4561	36	7.2	1067.1670	3	19.75	1.7104E6																														1	F1:5873	3399_01.raw	1	1	0	0	0
1	2	P02452|CO1A1_HUMAN	R.TGDAGPVGPP(+15.99)GPP(+15.99)GP(+15.99)PGP(+15.99)PGPPSAG.F	Y	40.63	2149.9915	25	0.7	1076.0038	2	28.94																										4.958E6					26	F26:9305	6401_01.raw	1	0	0	0	0
1	2	P02452|CO1A1_HUMAN	R.TGDAGPVGP(+15.99)PGP(+15.99)PGPP(+15.99)GP(+15.99)PGPPSAG.F	Y	40.51	2149.9915	25	-0.1	1076.0029	2	28.94		7.4187E7																													2	F2:9414	3399_02.raw	2	0	2	0	0
1	2	P02452|CO1A1_HUMAN	G.FSGLQGPPGPPGS(+203.08)P(+15.99)GEQGPSGASGPAGPR.G	Y	40.48	2818.3157	29	-8.2	940.4381	3	38.02																				3.5763E6											20	F20:12482	4484_03.raw	1	0	0	0	0
1	2	P02452|CO1A1_HUMAN	A.KGEP(+15.99)GPVGVQGPP(+15.99)GPAGEEGK.R	Y	40.42	1974.9646	21	2.1	659.3302	3	20.44																										1.2045E7	1.2445E7	1.29E7			28	F28:6022	6401_03.raw	3	0	0	0	0
1	2	P02452|CO1A1_HUMAN	R.GEP(+15.99)GPPGP(+15.99)AGAAGP(+15.99)AGNP(+15.99)GADGQP(+15.99)GAK.G	Y	40.37	2331.0361	27	1.7	778.0206	3	16.10											1.2028E7										5.1723E6				9.2596E6						25	F25:4180	6313_03.raw	3	0	0	0	0
1	2	P02452|CO1A1_HUMAN	R.GEPGPP(+15.99)GP(+15.99)AGAAGPAGNP(+15.99)GADGQP(+15.99)GAK.G	Y	40.30	2315.0413	27	1.3	772.6887	3	17.82			0																										1.2115E7		29	F29:4792	6474_01.raw	1	0	0	0	0
1	2	P02452|CO1A1_HUMAN	R.GRP(+15.99)GAP(+15.99)GPAGAR.G	Y	40.26	1094.5580	12	0.7	365.8602	3	12.92						4.1972E6	3.8816E6	3.7138E6				4.1879E5																			6	F6:3088	3849_01.raw	7	0	0	0	0
1	2	P02452|CO1A1_HUMAN	A.GPP(+15.99)GPIGNVGAP(+15.99)GAK.G	Y	40.20	1319.6832	15	3.1	660.8510	2	22.65																													4.334E6	4.6231E6	29	F29:6687	6474_01.raw	2	0	0	0	0
1	2	P02452|CO1A1_HUMAN	K.GEP(+15.99)GSPGENGAP(+15.99)GQMGP(+15.99)R.G	Y	40.13	1741.7324	18	-4.7	871.8694	2	14.04	7.3083E5			2.0697E6																											1	F1:3598	3399_01.raw	2	1	0	0	1
1	2	P02452|CO1A1_HUMAN	G.FS(+203.08)GLQGPPGPPGSP(+15.99)GEQGPSGASGPAGPR.G	Y	40.08	2818.3157	29	-8.2	1410.1536	2	39.08	1.6309E8	1.6512E8	1.8538E8	5.2383E7	5.0792E7	5.6181E7	5.5075E7	5.616E7	1.4812E8	1.551E8	1.6525E8	1.5781E7	1.5848E7	1.3873E7							5.1147E7	6.2658E7	3.2215E7	3.1075E7	3.0553E7	3.4328E7	3.787E7	3.5626E7			8	F8:12893	3849_03.raw	27	1	1	2	1
1	2	P02452|CO1A1_HUMAN	R.TGDAGPVGPP(+15.99)GPP(+15.99)GPP(+15.99)GPP(+15.99)GPP.S	Y	40.04	1934.9009	22	1.1	968.4587	2	30.20	9.6123E6	8.9069E6	9.4744E6						3.1606E6		3.5871E6										8.068E6	9.5703E6				0		3.775E6			1	F1:9840	3399_01.raw	8	1	1	1	0
1	2	P02452|CO1A1_HUMAN	R.GETGP(+15.99)AGRPGEVGP(+15.99)P(+15.99)GP(+15.99)P(+15.99)GPAGEK.G	Y	40.02	2247.0403	24	-0.3	750.0205	3	15.72																3.7251E6				0					1.2908E6			5.7963E6			25	F25:4090	6313_03.raw	3	0	0	0	0
1	2	P02452|CO1A1_HUMAN	K.TGP(+15.99)P(+15.99)GPAGQDGRP(+15.99)GPPGP(+15.99)P(+15.99)GAR.G	Y	40.01	2071.9670	22	-1.2	691.6621	3	15.60							1.7513E8																								7	F7:4382	3849_02.raw	1	0	0	0	0
1	2	P02452|CO1A1_HUMAN	R.TGDAGPVGPP(+15.99)GPP(+15.99)GP(+15.99)PGPP(+15.99)GPPSAGFDFSFLPQPPQ.E	Y	40.00	3453.6152	36	3.9	1152.2168	3	66.87					0																										5	F5:22428	3484_03_r.raw	0	0	0	0	0
1	2	P02452|CO1A1_HUMAN	T.GPVGPVGAR.G	Y	39.94	808.4555	9	-0.8	405.2347	2	17.95				4.9553E7	5.3998E7	9.4425E7	9.1451E7	7.9764E7	7.7497E6	8.3129E6	9.2985E6				2.1577E7	2.0368E7	1.9131E7	1.3452E7	1.1238E7	1.2423E7						1.3022E7	1.4666E7	1.3338E7	5.0256E7	4.8657E7	7	F7:5040	3849_02.raw	19	0	0	0	1
1	2	P02452|CO1A1_HUMAN	R.TGDAGPVGPP(+15.99)GP(+15.99)PGPP(+15.99)GPP(+15.99)GPPSAGFDFSFLPQPPQ.E	Y	39.94	3453.6152	36	0.4	1152.2128	3	65.17		0																													2	F2:21842	3399_02.raw	0	0	0	0	0
1	2	P02452|CO1A1_HUMAN	R.GLP(+15.99)GP(+15.99)PGAP(+15.99)GPQGFQGPPGEP(+15.99)GEP(+15.99)GASGP(+15.99)MGPR.G	Y	39.88	3099.3989	33	1.2	775.8580	4	33.80																					7.4145E6										21	F21:10880	5289_01.raw	1	0	0	0	0
1	2	P02452|CO1A1_HUMAN	F.P(+15.99)GLP(+15.99)GPSGEPGK.Q	N	39.70	1123.5509	12	-2.6	562.7812	2	34.04		2.5219E6		2.4588E6				1.7184E6		2.8212E6																					8	F8:11108	3849_03.raw	4	0	1	0	1
1	2	P02452|CO1A1_HUMAN	R.TGDAGPVGP(+15.99)PGPP(+15.99)GPP(+15.99)GPP(+15.99)GPPSAGFDFSFLPQPPQ.E	Y	39.66	3453.6152	36	2.1	1152.2147	3	65.45	0																					7.3817E6									22	F22:22490	5289_03_r.raw	1	0	0	0	0
1	2	P02452|CO1A1_HUMAN	A.TGAAGPP(+15.99)GPTGPAGP(+15.99)P(+15.99)GFP(+15.99)GAVGAK.G	Y	39.56	2149.0439	25	5.4	1075.5350	2	33.03				3.1613E6			2.8043E6		7.4861E6	6.5856E6	6.1317E6															2.7675E6					7	F7:10810	3849_02.raw	6	0	0	0	1
1	2	P02452|CO1A1_HUMAN	R.GAAGLP(+15.99)GPK.G	Y	39.45	782.4286	9	-0.7	392.2213	2	15.72	6.0871E8	5.8563E8	6.527E8	3.3049E8	3.7201E8	8.9565E8	8.417E8	7.9226E8	3.263E8	3.2666E8	3.107E8	1.7046E8	1.5459E8	1.4564E8	8.9208E7	8.3422E7	8.467E7	9.4797E7	9.644E7	1.0253E8	4.092E8	5.1031E8	7.4897E7	6.7862E7	7.5011E7	3.4848E8	3.8685E8	3.6193E8	8.0856E6		23	F23:4054	6313_01.raw	29	1	1	1	1
1	2	P02452|CO1A1_HUMAN	E.PGP(+15.99)VGVQGPP(+15.99)GPAGEEGK.R	Y	39.44	1660.8055	18	3.8	554.6112	3	23.69																						1.4307E6									22	F22:7418	5289_03_r.raw	1	0	0	0	0
1	2	P02452|CO1A1_HUMAN	R.GGP(+15.99)GSRGFP(+15.99)GADGVAGPK.G	Y	39.40	1614.7749	18	1.2	539.2662	3	21.13	1.1388E7	9.8986E6	1.0825E7																		8.4329E6	1.1922E7						4.495E6			22	F22:6449	5289_03_r.raw	6	1	1	1	0
1	2	P02452|CO1A1_HUMAN	K.NGDDGEAGKPGRP(+15.99)GERGP(+15.99)P(+15.99)GPQGAR.G	Y	39.40	2476.1438	25	0.1	496.2361	5	13.00	1.9116E7									2.7776E6																					1	F1:3174	3399_01.raw	2	1	0	0	0
1	2	P02452|CO1A1_HUMAN	K.DGLN(+.98)GLP(+15.99)GPIGP(+15.99)PGPR.G	Y	39.36	1545.7786	16	2.4	773.8984	2	40.28	1.0539E7									2.5437E6											1.0715E7										21	F21:13304	5289_01.raw	3	1	0	0	0
1	2	P02452|CO1A1_HUMAN	R.GNDGATGAAGPP(+15.99)GPTGPAGPP(+15.99)GFPGAVGAK(+178.05)GEAGPQGPR.G	Y	39.19	3558.6609	39	4.9	890.6769	4	33.38																						1.8004E7									22	F22:11034	5289_03_r.raw	1	0	0	0	0
1	2	P02452|CO1A1_HUMAN	R.TGDAGPVGP(+15.99)PGPP(+15.99)GP(+15.99)PGP(+15.99)PGPPSAG.F	Y	39.07	2149.9915	25	-1.2	1076.0017	2	29.13						0					4.7112E7																3.6041E6				27	F27:9249	6401_02.raw	2	0	0	0	0
1	2	P02452|CO1A1_HUMAN	R.GP(+15.99)SGPQGP(+15.99)GGPP(+15.99)GP(+15.99)K.G	Y	38.74	1349.6211	15	0.8	675.8184	2	13.47								0																							8	F8:3238	3849_03.raw	0	0	0	0	0
1	2	P02452|CO1A1_HUMAN	R.TGDAGPVGPP(+15.99)GPP(+15.99)GP(+15.99)PGPP(+15.99)GPPSAG.F	Y	38.73	2149.9915	25	-4.6	1075.9980	2	28.70	8.7218E6	8.4168E6	4.5753E7																		6.0431E7	6.0172E7						0			1	F1:9334	3399_01.raw	5	1	1	1	0
1	2	P02452|CO1A1_HUMAN	R.GEP(+15.99)GPTGLP(+15.99)GP(+15.99)PGERGGP(+15.99)GSR.G	Y	38.11	1991.9296	21	0.6	664.9842	3	19.01																							9.2828E6								23	F23:5443	6313_01.raw	1	0	0	0	0
1	2	P02452|CO1A1_HUMAN	G.VQGPP(+15.99)GPAGPR.G	Y	38.02	1047.5460	11	-1.1	524.7797	2	16.21	4.9053E6			3.2348E7	3.293E7	2.7349E7	2.3604E7	2.7573E7	1.0625E7	1.362E7	1.2658E7				6.0223E6	5.2414E6	5.9454E6	1.3475E7	1.3504E7	9.326E6						1.3048E7					20	F20:4336	4484_03.raw	16	1	0	0	1
1	2	P02452|CO1A1_HUMAN	K.TGPP(+15.99)GPAGQDGRPGPPGP(+15.99)P(+15.99)GAR.G	Y	38.01	2039.9772	22	1.4	681.0006	3	18.00								2.8289E7						2.6288E6																	14	F14:4917	4371_03.raw	2	0	0	0	0
1	2	P02452|CO1A1_HUMAN	R.GAP(+15.99)GDRGEP(+15.99)GPP(+15.99)GP.A	Y	38.01	1307.5741	14	0.5	654.7947	2	14.70				0	5.9304E5	7.5965E6	7.2594E6	6.9073E6																		2.1801E6	2.619E6	2.1552E6	1.718E6	1.3785E6	29	F29:3742	6474_01.raw	9	0	0	0	0
1	2	P02452|CO1A1_HUMAN	R.GVVGLPGQR.G	Y	38.00	881.5083	9	-0.2	441.7613	2	26.83	7.6915E6	6.4522E6	6.6393E6	4.7015E6	4.8188E6	9.3136E6	7.8632E6	7.471E6	5.1076E6												6.5837E6	9.493E6				6.0287E6	6.8797E6	7.0076E6			22	F22:8524	5289_03_r.raw	14	1	1	1	1
1	2	P02452|CO1A1_HUMAN	E.SGPSGPAGPTGAR.G	Y	37.84	1110.5417	13	-1.7	556.2772	2	15.29	2.3623E7		2.5115E7	1.9672E7	1.6549E7	1.6718E7		1.6324E7		1.8862E7	2.3194E7										8.986E6			2.8001E6	4.2303E6	1.2028E7	1.3028E7				6	F6:4246	3849_01.raw	13	1	0	1	1
1	2	P02452|CO1A1_HUMAN	R.GEPGPP(+15.99)GP(+15.99)AGFAGPP(+15.99)GADGQP(+15.99)GAK.G	Y	37.77	2148.9709	24	0.9	717.3315	3	28.04															3.4091E7																15	F15:9005	4406_01.raw	1	0	0	0	0
1	2	P02452|CO1A1_HUMAN	R.TGDAGPVGPP(+15.99)GPP(+15.99)GPP(+15.99)GPP(+15.99)GPPSAGF.D	Y	37.69	2297.0598	26	1.9	766.6954	3	40.09	0	9.2382E6	1.0042E7																		0										1	F1:13482	3399_01.raw	2	0	1	1	0
1	2	P02452|CO1A1_HUMAN	R.VGPP(+15.99)GPSGNAGPP(+15.99)GPP(+15.99)GP.A	Y	37.63	1555.7266	18	-2.4	778.8687	2	25.26					1.39E7	2.2586E7	2.0324E7	2.295E7																		6.6186E6		6.2611E6			7	F7:7859	3849_02.raw	6	0	0	0	0
1	2	P02452|CO1A1_HUMAN	R.TGDAGPVGPP(+15.99)GP(+15.99)PGPP(+15.99)GP(+15.99)PGPP(+15.99)SAGFDF.S	Y	37.50	2575.1501	28	4.7	859.3947	3	47.76			2.0001E7	5.5807E6																											3	F3:16576	3399_03.raw	2	0	0	1	1
1	2	P02452|CO1A1_HUMAN	R.VGPP(+15.99)GPSGNAGP(+15.99)P(+15.99)GPPGP(+15.99)AGK.E	Y	37.46	1827.8750	21	1.8	610.3000	3	17.84																					1.1287E8										21	F21:4783	5289_01.raw	1	0	0	0	0
1	2	P02452|CO1A1_HUMAN	P.IGNVGAP(+15.99)GAK.G	Y	37.45	898.4872	10	0.5	450.2511	2	15.22						0	2.8817E6	2.2403E6																							8	F8:3880	3849_03.raw	2	0	0	0	0
1	2	P02452|CO1A1_HUMAN	I.SVPGPMGP(+15.99)SGPR.G	Y	37.37	1153.5549	12	-0.8	577.7843	2	18.58																					6.3498E6	1.2632E7									21	F21:5316	5289_01.raw	2	0	0	0	0
1	2	P02452|CO1A1_HUMAN	R.TGDAGPVGP(+15.99)PGP(+15.99)PGP(+15.99)PGPP(+15.99)GPPSAGFDFSFLPQPPQ.E	Y	37.31	3453.6152	36	1.7	1152.2144	3	65.38	0	1.5854E5	3.725E6		0																1.0853E7	7.3817E6									2	F2:21914	3399_02.raw	5	0	1	1	0
1	2	P02452|CO1A1_HUMAN	K.DGLN(+.98)GLP(+15.99)GPIGPPGPR.G	Y	37.27	1529.7837	16	2.1	765.9008	2	42.99											1.4382E5																				11	F11:14604	4312_03.raw	1	0	0	0	0
1	2	P02452|CO1A1_HUMAN	K.TGPP(+15.99)GPAGQDGRP(+15.99)GPPGP(+15.99)P(+15.99)GAR.G	Y	37.19	2055.9722	22	6.2	686.3356	3	17.13			6.9677E7																						1.9311E8						3	F3:5227	3399_03.raw	2	0	0	1	0
1	2	P02452|CO1A1_HUMAN	A.P(+15.99)GIAGAP(+15.99)GFP(+15.99)GAR.G	Y	37.18	1214.6042	13	3.7	608.3116	2	28.71													1.4765E6								3.3649E6							0			21	F21:8949	5289_01.raw	2	0	0	0	0
1	2	P02452|CO1A1_HUMAN	R.VGPP(+15.99)GP(+15.99)SGNAGP(+15.99)P(+15.99)GP(+15.99)P(+15.99)GPAGK.E	Y	37.17	1859.8647	21	1.7	620.9633	3	15.18																					2.5012E7										21	F21:4048	5289_01.raw	1	0	0	0	0
1	2	P02452|CO1A1_HUMAN	R.TGDAGPVGPP(+15.99)GPP(+15.99)GP(+15.99)PGP(+15.99)PGPP(+15.99)SAGFDF.S	Y	37.16	2575.1501	28	1.7	859.3921	3	49.26		2.5451E7			6.1992E6																										2	F2:16731	3399_02.raw	2	0	1	0	0
1	2	P02452|CO1A1_HUMAN	R.GEQGP(+15.99)AGSPGFQGLP(+15.99)GPAGPP(+15.99)GEAGK.P	Y	36.98	2364.0981	26	-0.1	1183.0563	2	32.60																									1.2117E6						25	F25:10312	6313_03.raw	1	0	0	0	0
1	2	P02452|CO1A1_HUMAN	T.GPIGPP(+15.99)GPAGAP(+15.99)GDK.G	Y	36.90	1318.6516	15	-5.7	660.3293	2	29.25		0																			3.7873E5										21	F21:9220	5289_01.raw	1	0	0	0	0
1	2	P02452|CO1A1_HUMAN	R.GRP(+15.99)GAPGPAGAR.G	Y	36.83	1078.5631	12	-0.7	360.5280	3	13.35	0							2.467E5																							8	F8:3182	3849_03.raw	1	0	0	0	0
1	2	P02452|CO1A1_HUMAN	R.GPP(+15.99)GPMGP(+15.99)P(+15.99)GLAGPP(+15.99)GESGR.E	Y	36.70	1847.8470	20	2.2	924.9329	2	25.05	3.0548E8	2.8643E8																				2.4287E8						1.4015E8			1	F1:7748	3399_01.raw	4	1	1	0	0
1	2	P02452|CO1A1_HUMAN	R.TGDAGPVGPP(+15.99)GP(+15.99)PGP(+15.99)PGPP(+15.99)GPPSAGFDFSFLPQPPQ.E	Y	36.68	3453.6152	36	0.4	1152.2128	3	66.79	1.5266E6	7.855E5																			1.0853E7	7.3817E6									1	F1:22461	3399_01.raw	5	1	1	0	0
1	2	P02452|CO1A1_HUMAN	R.GETGP(+15.99)AGRPGEVGP(+15.99)P(+15.99)GP(+15.99)PGP(+15.99)AGEK.G	Y	36.59	2247.0403	24	-1.7	750.0194	3	15.62		1.6019E7																													2	F2:4271	3399_02.raw	1	0	1	0	0
1	2	P02452|CO1A1_HUMAN	R.TGDAGPVGPP(+15.99)GPP(+15.99)GPP(+15.99)GPP(+15.99)GPP(+15.99).S	Y	36.50	1950.8958	22	-1.6	976.4536	2	27.23	3.2684E6																				3.4548E6	3.7373E6									1	F1:8747	3399_01.raw	3	1	0	0	0
1	2	P02452|CO1A1_HUMAN	K.DGEAGAQGPP(+15.99)GPAGPAGERG.E	Y	36.49	1762.7870	20	0.1	882.4009	2	18.05	2.8983E8	2.8815E8	1.8711E8		7.2158E7	1.1736E8						4.1636E7	4.1824E7	4.2302E7							3.4488E7		4.2168E7	7.0259E7	6.8482E7		6.3982E7	5.7386E7			24	F24:4897	6313_02.raw	18	2	2	1	0
1	2	P02452|CO1A1_HUMAN	K.TGPP(+15.99)GPAGQDGRP(+15.99)GP(+15.99)PGPP(+15.99)GAR.G	Y	36.47	2055.9722	22	6.5	686.3358	3	18.19						0																									6	F6:5129	3849_01.raw	0	0	0	0	0
1	2	P02452|CO1A1_HUMAN	R.GEPGP(+15.99)PGP(+15.99)AGAAGPAGNP(+15.99)GADGQPGAK.G	Y	36.33	2299.0464	27	2.6	767.3580	3	19.05																										3.8118E7					26	F26:5628	6401_01.raw	1	0	0	0	0
1	2	P02452|CO1A1_HUMAN	R.TGDAGPVGPP(+15.99)GP(+15.99)PGPP(+15.99)GP(+15.99)PGPPSAG.F	Y	36.31	2149.9915	25	4.2	717.6741	3	29.07		6.577E7																													2	F2:9382	3399_02.raw	1	0	1	0	0
1	2	P02452|CO1A1_HUMAN	K.GSPGADGP(+15.99)AGAP(+15.99)GTP(+15.99)GPQGI.A	Y	36.30	1707.7699	20	2.1	854.8940	2	28.97					4.448E6	1.0179E8	8.865E7			6.9295E6																					6	F6:9515	3849_01.raw	4	0	0	0	0
1	2	P02452|CO1A1_HUMAN	G.LTGPIGPP(+15.99)GPAGAP(+15.99)GDK.G	Y	36.28	1532.7833	17	2.7	767.4010	2	27.19							2.2148E6																								7	F7:8559	3849_02.raw	1	0	0	0	0
1	2	P02452|CO1A1_HUMAN	R.TGDAGPVGPP(+15.99)GPP(+15.99)GP(+15.99)PGP(+15.99)PGP(+15.99)PSAGFDF.S	Y	36.23	2575.1501	28	3.0	859.3932	3	49.61			2.0001E7							9.5148E6											2.3815E7										10	F10:16813	4312_02.raw	3	0	0	1	0
1	2	P02452|CO1A1_HUMAN	L.PGPS(+365.13)GEPGKQGPSGASGER.G	Y	36.22	2115.9556	19	-4.3	529.9939	4	13.22			0																												3	F3:3309	3399_03.raw	0	0	0	0	0
1	2	P02452|CO1A1_HUMAN	K.DGEAGAQGPPGPAGPAGERG.E	Y	36.16	1746.7920	20	1.0	874.4041	2	19.84	2.8888E7	2.6027E7	2.9758E7				1.3512E7																								3	F3:5771	3399_03.raw	4	1	1	1	0
1	2	P02452|CO1A1_HUMAN	G.VQGP(+15.99)PGPAGEEGK.R	Y	36.13	1237.5938	13	2.2	619.8055	2	15.81						2.5408E7	2.5309E7	2.2747E7																							6	F6:4125	3849_01.raw	3	0	0	0	0
1	2	P02452|CO1A1_HUMAN	R.GFSGLDGAK(+15.99).G	Y	35.95	866.4133	9	2.5	434.2150	2	23.17	1.3055E8	1.251E8	1.3799E8	8.5989E7	8.9938E7	9.0946E7		7.8317E7													9.3974E7	1.287E8				6.8931E7	6.8553E7	6.3521E7			22	F22:7112	5289_03_r.raw	12	1	1	1	1
1	2	P02452|CO1A1_HUMAN	R.VGP(+15.99)PGP(+15.99)SGNAGPP(+15.99)GP(+15.99)PGP(+15.99)AGK.E	Y	35.67	1843.8699	21	0.3	615.6307	3	16.64																		1.0113E7													18	F18:4576	4484_01.raw	1	0	0	0	0
1	2	P02452|CO1A1_HUMAN	K.GSPGADGP(+15.99)AGAP(+15.99)GTPGPQGI.A	Y	35.65	1691.7750	20	0.1	846.8949	2	31.03					7.2855E6				1.0904E7							3.3351E6															9	F9:10119	4312_01.raw	3	0	0	0	0
1	2	P02452|CO1A1_HUMAN	R.TGDAGPVGPP(+15.99)GPP(+15.99)GP(+15.99)PGPPGPPSAGFDF.S	Y	35.52	2543.1604	28	2.2	848.7292	3	52.96	7.7502E6	6.386E6	1.2851E7																												1	F1:17825	3399_01.raw	4	1	1	2	0
1	2	P02452|CO1A1_HUMAN	R.TGDAGPVGPP(+15.99)GPP(+15.99)GP(+15.99)PGPP(+15.99)GP(+15.99)PSAGFDF.S	Y	35.50	2575.1501	28	2.4	859.3927	3	49.53				5.5807E6					6.7059E6		0																	1.1681E7			28	F28:16464	6401_03.raw	3	0	0	0	1
1	2	P02452|CO1A1_HUMAN	R.TGDAGPVGPP(+15.99)GPP(+15.99)GPP(+15.99)GP(+15.99)PGPP(+15.99)SAGFDF.S	Y	35.30	2575.1501	28	1.0	859.3915	3	49.48			2.0001E7																			3.348E7									22	F22:16725	5289_03_r.raw	2	0	0	1	0
1	2	P02452|CO1A1_HUMAN	R.TGDAGPVGP(+15.99)PGP(+15.99)PGP(+15.99)PGPP(+15.99)GPPSAGFDF.S	Y	35.27	2559.1553	28	0.8	1280.5859	2	51.55							1.5046E7																			5.9606E5					26	F26:17140	6401_01.raw	2	0	0	0	0
1	2	P02452|CO1A1_HUMAN	R.GPSGPQGPGGP(+15.99)P(+15.99)GP(+15.99)K.G	Y	35.27	1333.6261	15	1.1	667.8210	2	14.03								1.7123E7						4.5668E6										2.5643E6							24	F24:3558	6313_02.raw	3	0	0	0	0
1	2	P02452|CO1A1_HUMAN	R.P(+15.99)GEAGLP(+15.99)GAK.G	Y	35.18	927.4661	10	0.6	464.7406	2	15.84					4.2502E6	1.5923E7	1.5941E7	1.5711E7					3.8507E6	3.4056E6	2.8508E6											2.6824E6	3.6701E6	3.1826E6			8	F8:4070	3849_03.raw	10	0	0	0	0
1	2	P02452|CO1A1_HUMAN	R.P(+15.99)GEVGP(+15.99)P(+15.99)GP(+15.99)P(+15.99)GPAGEK.G	Y	35.16	1521.6946	16	4.1	761.8577	2	15.51						9.7848E5																									6	F6:4038	3849_01.raw	1	0	0	0	0
1	2	P02452|CO1A1_HUMAN	G.LQGPPGPPGS(+365.13)PGEQGPSGASGPAGPR.G	Y	35.06	2673.2517	26	0.8	892.0919	3	35.40			3.2515E6																			5.4867E6									22	F22:11769	5289_03_r.raw	2	0	0	1	0
1	2	P02452|CO1A1_HUMAN	R.GEP(+15.99)GPTGLP(+15.99)GPP(+15.99)GERG.G	Y	35.05	1521.7058	16	0.5	761.8605	2	22.09	4.4991E8	4.3784E8			2.5319E8								7.5743E7	6.3471E7									9.1253E7	8.4006E7	8.197E7	2.1535E8	2.1077E8	1.9189E8			23	F23:6738	6313_01.raw	11	1	1	0	0
1	2	P02452|CO1A1_HUMAN	G.GISVPGP(+15.99)MGPSGPR.G	Y	34.82	1323.6605	14	1.1	662.8383	2	28.49		1.5133E7	1.4152E7				7.974E6														8.7513E6	1.0669E7						5.9058E6			2	F2:9156	3399_02.raw	6	0	1	1	0
1	2	P02452|CO1A1_HUMAN	R.GEP(+15.99)GPPGP(+15.99)AGFAGP(+15.99)P(+15.99)GADGQP(+15.99)GAK.G	Y	34.72	2164.9661	24	0.0	722.6626	3	26.43			0																												3	F3:8468	3399_03.raw	0	0	0	0	0
1	2	P02452|CO1A1_HUMAN	P.SGPQGPGGP(+15.99)PGP(+15.99)K.G	Y	34.61	1163.5570	13	1.4	582.7866	2	13.94															1.0701E6																15	F15:3456	4406_01.raw	1	0	0	0	0
1	2	P02452|CO1A1_HUMAN	R.TGDAGPVGPP(+15.99)GP(+15.99)PGP(+15.99)PGPP(+15.99)GPP(+15.99)SAGFDF.S	Y	34.58	2575.1501	28	2.8	859.3931	3	49.68																											2.3756E7				27	F27:16449	6401_02.raw	2	0	0	0	0
1	2	P02452|CO1A1_HUMAN	R.TGDAGPVGPP(+15.99)GPP(+15.99)GP(+15.99)PGP(+15.99)P(+15.99)GPPSAGFDF.S	Y	34.49	2575.1501	28	0.2	859.3908	3	49.48	2.2649E7																														1	F1:16779	3399_01.raw	1	1	0	0	0
1	2	P02452|CO1A1_HUMAN	R.GLTGPIGP(+15.99)PGP(+15.99)AGAP(+15.99)GDK.G	Y	34.43	1605.7997	18	2.7	803.9093	2	28.86																						1.4312E7									22	F22:9383	5289_03_r.raw	1	0	0	0	0
1	2	P02452|CO1A1_HUMAN	R.VGPPGP(+15.99)SGNAGPP(+15.99)GPP(+15.99)GP.A	Y	34.39	1555.7266	18	0.5	778.8709	2	23.97				1.1693E7																								6.2611E6			28	F28:7414	6401_03.raw	2	0	0	0	1
1	2	P02452|CO1A1_HUMAN	I.SVPGPMGPSGP(+15.99)R.G	Y	34.38	1153.5549	12	0.3	577.7849	2	17.63							6.5897E8																								7	F7:5320	3849_02.raw	1	0	0	0	0
1	2	P02452|CO1A1_HUMAN	G.AP(+15.99)GIAGAP(+15.99)GFP(+15.99)GAR.G	Y	34.37	1285.6414	14	2.7	643.8297	2	27.88					3.5378E6																										5	F5:8969	3484_03_r.raw	1	0	0	0	0
1	2	P02452|CO1A1_HUMAN	R.GFP(+15.99)GLPGP(+15.99)SGEPGK.Q	N	34.18	1327.6407	14	0.4	664.8279	2	32.80																					6.6148E8										21	F21:11359	5289_01.raw	1	0	0	0	0
1	2	P02452|CO1A1_HUMAN	R.GAAGLP(+15.99)GP(+15.99)K.G	Y	34.17	798.4235	9	-1.9	400.2183	2	16.26	7.3403E7	7.4961E7	8.181E7	3.9394E7	4.2436E7	1.4278E8	1.5468E8	1.3824E8	4.205E7	4.5816E7	4.166E7	2.7297E7	2.615E7	2.3106E7	1.6956E7	1.669E7	1.7268E7	1.0074E7	9.1902E6	1.1861E7	5.1237E7	5.9885E7	9.0887E6	9.4505E6	8.5207E6	3.8154E7	4.1819E7	4.0152E7			15	F15:4396	4406_01.raw	28	1	1	1	1
1	2	P02452|CO1A1_HUMAN	R.TGDAGPVGPP(+15.99)GPP(+15.99)GPP(+15.99)GP(+15.99)PGPPSAG.F	Y	34.16	2149.9915	25	1.6	717.6722	3	29.02				2.8069E6			0														6.0431E7	6.0172E7						4.8824E6			21	F21:9186	5289_01.raw	4	0	0	0	1
1	2	P02452|CO1A1_HUMAN	R.GERGFP(+15.99)GLP(+15.99)GPSGEP(+15.99)GK.Q	N	34.14	1685.8008	17	1.8	562.9419	3	33.51	1.7254E7			7.0215E6	7.1212E6				2.5299E7	3.5377E7	3.6507E7																1.0467E7				27	F27:10989	6401_02.raw	7	1	0	0	1
1	2	P02452|CO1A1_HUMAN	H.RGFSGLDGAK.G	Y	34.14	1006.5195	10	1.5	504.2678	2	19.87			4.1292E6																		3.74E6	3.3054E6					1.6842E6	8.2267E5			21	F21:5900	5289_01.raw	6	0	0	1	0
1	2	P02452|CO1A1_HUMAN	R.TGDAGPVGPP(+15.99)GPP(+15.99)GPP(+15.99)GPPGPPSAGFDF.S	Y	34.14	2543.1604	28	-4.0	848.7240	3	51.59	8.2253E6	6.386E6	6.5917E6																			1.2192E7									2	F2:17738	3399_02.raw	5	1	1	1	0
1	2	P02452|CO1A1_HUMAN	R.TGDAGPVGPP(+15.99)GPP(+15.99)GPP(+15.99)GP(+15.99)PGP(+15.99)PSAGFDF.S	Y	34.08	2575.1501	28	1.5	859.3920	3	49.53			2.7448E7						6.7059E6																			1.1681E7			3	F3:16833	3399_03.raw	3	0	0	1	0
1	2	P02452|CO1A1_HUMAN	R.TGDAGPVGPP(+15.99)GPP(+15.99)GP(+15.99)P(+15.99)GPP(+15.99)GPPSAGFDF.S	Y	34.02	2575.1501	28	-1.0	859.3898	3	50.50																						3.4069E7									22	F22:17159	5289_03_r.raw	2	0	0	0	0
1	2	P02452|CO1A1_HUMAN	P.AGP(+15.99)PGAPGAP(+15.99)GAPGPVGPAGK.S	Y	33.96	1710.8688	21	0.8	856.4424	2	24.45						4.9097E6																									6	F6:7629	3849_01.raw	1	0	0	0	0
1	2	P02452|CO1A1_HUMAN	K.GEP(+15.99)GPVGV.Q	Y	33.84	726.3548	8	0.1	364.1847	2	24.41						1.1888E8	8.8017E7	8.2469E7																							6	F6:7746	3849_01.raw	3	0	0	0	0
1	2	P02452|CO1A1_HUMAN	K.NGDDGEAGKPGRP(+15.99)GERGP(+15.99)PGPQGAR.G	Y	33.66	2460.1489	25	1.0	616.0451	4	13.31		1.1291E7																									5.818E6				2	F2:3340	3399_02.raw	2	0	1	0	0
1	2	P02452|CO1A1_HUMAN	R.GETGP(+15.99)AGRPGEVGPP(+15.99)GPP(+15.99)GP(+15.99)AGEK.G	Y	33.63	2231.0454	24	0.3	744.6893	3	18.67																						0									22	F22:5405	5289_03_r.raw	0	0	0	0	0
1	2	P02452|CO1A1_HUMAN	R.TGDAGPVGP(+15.99)PGP(+15.99)PGPP(+15.99)GPP(+15.99)GPP(+15.99)SA.G	Y	33.62	2108.9648	24	2.6	1055.4924	2	27.73																					2.7522E6										21	F21:8675	5289_01.raw	1	0	0	0	0
1	2	P02452|CO1A1_HUMAN	R.GEPGP(+15.99)P(+15.99)GP(+15.99)AGAAGPAGNP(+15.99)GADGQP(+15.99)GAK.G	Y	33.57	2331.0361	27	1.8	778.0208	3	16.09																								8.524E6							24	F24:4300	6313_02.raw	1	0	0	0	0
1	2	P02452|CO1A1_HUMAN	R.TGDAGPVGPP(+15.99)GPP(+15.99)GP(+15.99)PGPP(+15.99)GPPSAGFDF.S	Y	33.54	2559.1553	28	0.4	854.0594	3	49.54	5.2911E7							1.4719E7																							1	F1:17040	3399_01.raw	2	1	0	0	0
1	2	P02452|CO1A1_HUMAN	S.GNAGP(+15.99)P(+15.99)GPP(+15.99)GPAGK.E	Y	33.53	1220.5785	14	-2.4	611.2950	2	18.74										2.8396E7																					10	F10:5452	4312_02.raw	1	0	0	0	0
1	2	P02452|CO1A1_HUMAN	R.TGDAGPVGPP(+15.99)GP(+15.99)PGP(+15.99)PGPP(+15.99)GPPSAG.F	Y	33.52	2149.9915	25	4.2	717.6741	3	29.07	6.0744E7	6.577E7																								4.958E6					2	F2:9298	3399_02.raw	3	1	1	0	0
[truncated: 7,746 more rows]
[truncated: 31 more columns]
